# Supplementary material for: A systems biology network analysis of nutri(epi)genomic changes in endothelial cells exposed to epicatechin metabolites
Source: PubMed Central journal article supplement (PMC6195584; doi:10.1038/s41598-018-33959-x), 2018-10-19
Supplement: 41598_2018_33959_MOESM2_ESM.pdf [file 41598_2018_33959_MOESM2_ESM.pdf]

## Supplemental information

### A systems biology network analysis of nutri(epi)genomic changes in endothelial cells exposed to epicatechin metabolites

Dragan Milenkovic<sup>a,b\*</sup>, Wim Vanden Berghe<sup>c,d</sup>, Christine Morand<sup>a</sup>, Sylvain Claude<sup>a</sup>, Annette van de Sandt<sup>e</sup>, Simone Gorressen<sup>e</sup>, Laurent-Emmanuel Monfoulet<sup>a</sup>, Chandra S. Chirumamilla<sup>c</sup>, Ken Declerck<sup>c</sup>, Katarzyna Szarc vel Szic<sup>c</sup>, Maija Lahtela-Kakkonen<sup>f</sup>, Clarissa Gerhauser<sup>g</sup>, Marc W. Merx<sup>d#</sup>, Malte Kelm<sup>c</sup>

<sup>a</sup> INRA, UMR 1019, UNH, CRNH Auvergne, F-63000 Clermont-Ferrand ; Clermont Université, Université d'Auvergne, Unité de Nutrition Humaine, BP 10448, F-63000 Clermont-Ferrand, France

<sup>b</sup> Department of Internal Medicine, Division of Cardiovascular Medicine, School of Medicine, University of California Davis, Davis, California, 95616, United States of America.

<sup>c</sup> PPES, Department of Biomedical Sciences, University of Antwerp (UA), Wilrijk, Belgium

<sup>d</sup> L-GEST, Department of Biochemistry and Microbiology, UGent, Ghent, Belgium

<sup>e</sup> Department of Medicine, Division of Cardiology, Pneumology and Angiology, University Hospital Düsseldorf, Germany

<sup>f</sup> School of Pharmacy, University of Eastern Finland, Kuopio, Finland

<sup>g</sup> Division of Epigenomics and Cancer Risk Factors, DKFZ, Heidelberg, Germany

<sup>#</sup> Actual address: KRH Klinikum Robert Koch Gehrden, Department of Cardiovascular Diseases and Internal Intensive Medicine, Von-Reden-Straße 1, 30989 Gehrden, Germany

Supplemental Note:

***Microcirculation mouse model - Intravital fluorescence microscopy***

Mice were anesthetized by an intraperitoneal (i.p.) administration of ketamine (60 µg/g body weight) and xylazine (10 µg/g body weight). Upon surgical anesthesia, the entire back of the mice was shaven and a chemical hair remover was used to remove any remaining hair. The technique of implanting an Aluminium access chamber in the dorsal skin flap of rats, originally described by Papenfuss et al. (Papenfuss et al, 1979), was modified and adapted to meet carefully established criteria of stability (thin, translucent skin) in mice. Therefore, spacers made of stainless steel were used yielding in a frame-to-frame distance of 400-450 µm while the chamber was affixed in a position perpendicular to the animal's back. The thickness of the preparation and thus the distance between both frames were chosen on the basis of optical translucency needed for proper visualization of microscopic blood channels without compressing larger blood vessels. This chamber was tolerated by all animals.

The surgical procedure was done by placing the animal on a surgical stage. A midpoint line was drawn along the back and a dorsal skin fold was affixed to the surgical stage by means of silk sutures (5-0) to stabilize the preparation. One part of the chamber frame consisting of the frame, two lower bolts and spacers was slightly pushed under the skin-fold causing the skin to protrude. Two holes were cut carefully through the skin, this part of the chamber introduced through the holes and fixed using two baby mosquito hemostats. A template, equivalent to the outer diameter of the chamber's collar served to mark a circle outlining the subsequent incision. A crisscross cut resulting in four skin flaps was made, and each of the four flaps was removed with a fine, curved scissor tracing precisely the perimeter of the outline with an effort to follow the hypodermis. The

area exposed was freed from overlaying fascia utilizing an operating microscope leaving one layer of s.c. tissue at the opposite side of the epidermis intact. During this surgical procedure, the area was kept moist by allowing drops of warmed normal saline to irrigate the preparation that was limited to one side of the skin-fold only. After trimming the area under observation, the matching side of the chamber was inserted. Mechanical connection of the two chamber frames was accomplished using metal nuts for top and lower bolts. At seven points, the 5-0 sutures were fixed around the chamber to support the position of the skin flap. Animals were allowed for recovery for 72h before first intravital fluorescence microscopy was performed. Pain medication (buprenorphine 0.05mg/kg body weight) was administered subcutaneously immediately after surgery and every 8 hours thereafter.

For the in vivo microscopy analysis, mice were immobilized and the skin fold preparation was attached to the microscope stage. After intravenous injection of 0.05 ml of 5% Fluorescein isothiocyanate-dextran (Sigma-Aldrich, Germany) which stains blood plasma, and in vivo leukocyte staining by 0.05 ml 1% Rhodamine 6G chloride (Invitrogen, Germany) injection in a tail vein or the retro-bulbar venous plexus, in vivo microscopy was performed using a Leica DM 4000M microscope. The observations were recorded by video camera and transferred to a video system for off-line evaluation. The microscope images were recorded on DVD and analyzed during playback by using CapImage (Dr. Zeintl, Germany). Microscopy was performed at baseline (72 h after application of dorsal skin fold chamber) and 12h after CLP induction.

#### *Microcirculatory analysis*

Stained plasma allowed the measurement of vessel diameters and red blood cell velocity (RBCV). RBCV was assessed in the centerline of the respective vessel by frame-to-frame analysis. Stained rolling leukocytes were defined as cells moving along the endothelial lining at a

velocity markedly slower than that of the surrounding red cell and are given as percentage of the total number of calculated leukocytes passing through the observed vessel segment in 1 minute.

### *Sepsis induction*

Mice were rendered septic by cecum ligation and puncture (CLP) (Merx et al, 2005; Merx et al, 2004) 6 h after baseline intravital fluorescence microscopy was performed. Anesthesia was induced by intraperitoneal (i.p.) administration of ketamine (60  $\mu\text{g/g}$  body weight) and xylazine (10  $\mu\text{g/g}$  body weight). Through a 1-cm abdominal midline incision, the cecum was ligated below the ileo-cecal valve with careful attention to avoid obstruction of the ileum or colon. The cecum was then subjected to a single “through and through” perforation with a 20-gauge needle. After repositioning of the bowel, the abdominal incision was closed in layers with standard silk surgical suture 4-0 (Ethicon, Somerville, New Jersey). Sham operated mice underwent the same procedure, except for ligation and perforation of the cecum. Pain medication (buprenorphine 0.05mg/kg body weight) and volume support (NaCl 0.9%, 0.05 ml/g BW) were administered subcutaneously immediately after sepsis induction and every 8 hours thereafter. All mice had unlimited access to food and water. Twelve hours after sepsis induction, intravital microscopy was performed again to analyze the effects of microbial sepsis in microcirculation.

**Supplemental Figure S1:** Mice study. (A): schematic presentation of study design. (B): composition of used diets

A)

| Diet                 | Flavanol free diet |           | flavanol rich diet |           |
|----------------------|--------------------|-----------|--------------------|-----------|
|                      | gm%                | kcal%     | gm%                | kcal%     |
| Protein              | 16                 | 15        | 16                 | 15        |
| Carbohydrate         | 57                 | 50        | 57                 | 50        |
| <b>Fat</b>           | <b>18</b>          | <b>36</b> | <b>18</b>          | <b>36</b> |
| Total                |                    | 100       |                    | 100       |
| Kcal/gm              | 4,5                |           | 4,5                |           |
|                      |                    |           |                    |           |
| Ingredients          | gm                 | kcal      | gm                 | kcal      |
| Casein               | 167,5              | 670       | 167,5              | 670       |
| DL-Methionine        | 2,57               | 10,28     | 2,57               | 10,28     |
| Corn starch          | 286,5              | 1146      | 286,5              | 1146      |
| Fructose             | 143,25             | 573       | 143,25             | 573       |
| Dextrose (Glucose)   | 143,25             | 573       | 143,25             | 573       |
| Cellulose,BW200      | 50                 | 0         | 50                 | 0         |
| Milk Fat (Anhydrous) | 176                | 1584      | 176                | 1584      |
| Corn Oil             | 10                 | 90        | 10                 | 90        |
| Ethoxyquin           | 0,04               | 0         | 0,04               | 0         |
| Mineral Mix S10001   | 35                 | 0         | 35                 | 0         |
| Calcium Carbonate    | 4                  | 0         | 4                  | 0         |
| Vitamin Mix V13005   | 10                 | 40        | 10                 | 40        |
| Vitamin K1           | 0,0005             | 0         | 0,0005             | 0         |
| Choline Bitartrate   | 2                  | 0         | 2                  | 0         |
| Cholesterol          | 1,5                | 0         | 1,5                | 0         |
| epicatechin          | 0                  | 0         | 0,06               | 0         |
| Nitrate              | 0                  | 0         | 0                  | 0         |
|                      |                    |           |                    |           |
| Yellow-Orange Dye    | 0                  | 0         | 0,05               | 0         |
| Blue Dye             | 0                  | 0         | 0                  | 0         |

B)



**Supplemental Figure S2:** Chemical structures of epicatechin metabolites used for in-vitro studies



(-)-epicatechin-4'-sulfate



3'-*O*-methyl(-)-epicatechin



4'-*O*-methyl(-)-epicatechin-7-β-D-glucuronide

**Supplemental Figure S3:** Circulating white blood cells were analyzed at baseline and 12h after sepsis induction after treatment with flavanol-free and flavanol-rich diet over a period of 7 days. Both groups slightly diminished circulating white blood cells 12h post CLP compared to baseline, while circulating white blood cells did not differ at baseline and 12h post CLP induction between both groups (n=5, mean +/- SEM; 2-way ANOVA and Bonferoni's posttest).



**Supplemental Figure S4:** Venules diameter measurements in the dorsal skinfold chamber in post-capillary venules at baseline and 12h after sepsis induction. Mice are treated with flavanol-free and flavanol-rich diet over a period of 7 days. A: picture of measurements in venules (D: diameter; V: velocity) B: Venules diameter measured 12h after CLP induction in mice compared to baseline (n=5, mean +/- SEM; \*\*p< 0,01; 2-way ANOVA and Bonferoni's posttest).



**Supplemental Figure S5:** Red blood cell velocity measurements in the dorsal skinfold chamber in post-capillary venules at baseline and 12h after sepsis induction (n=5, mean +/- SEM; \*\*p< 0,01; 2-way ANOVA and Bonferoni's posttest).



**Supplemental Figure S6:** Merge of three top scoring gene networks obtained from the list of differentially expressed miRNA in response to epicatechin metabolites in HUVEC with their validated target genes. The networks and target genes were obtained from MetaCore database. Red, bleu and orange lines represent the three networks.



**Supplemental Figure S7:** Western blot analysis of the impact of flavanol metabolites on phosphorylation of p38 cell signalling proteins in HUVECs. n=3 ; mean +/- SEM; \*: p < 0.01; 2-way ANOVA.



Supplemental information: western-blot gels for p38 and Phospho-p38. Gels were analyzed using Odyssey Li-Cor (Lincoln, Nebraska, USA) detection system and density of the signals was quantified using Odyssey software. TNF: tumor necrosis factor; MIX: mixture of studied flavanol metabolites; NR: samples not related to this work



**Supplemental Figure S8:** Docking studies showing the binding of the metabolites to the ATP binding cavity of the P38-MAPK. A) 3'-O-methyl(-)-epicatechin; B) 4'-O-methyl(-)-epicatechin-7- $\beta$ -D-glucuronide; C) (-)-epicatechin-4'-sulfate

**A) 3'-O-methyl(-)-epicatechin**



**B) 4'-*O*-methyl(-)-epicatechin-7- $\beta$ -D-glucuronide**



C) (-)-epicatechin-4'-sulfate



**Supplemental Figure S9:** Flow chart describing workflow of DNA methylation analysis.



**Supplemental Table S1:** Site map property values and Dscore ranks for the p38 MAPK (Pdb id: 4F9Y)

| <b>Entry Name (Top ranked )</b> | <b>SiteScore</b> | <b>Dscore</b> | <b>Volume</b> | <b>Important residues of site map predicted binding site</b>                                                                                                                       |
|---------------------------------|------------------|---------------|---------------|------------------------------------------------------------------------------------------------------------------------------------------------------------------------------------|
| <b>F9Yproteinsitemap_site_1</b> | 1.119            | 1.166         | 535.08        | <b>Chain A:</b> 71,171,104,74,105,75,51,106,52,107,53,108,152,109,178,30,154,179,31,155,32<br>33,157,35,36,111, <b>180</b> ,38,112, <b>181</b> ,84, <b>183</b> ,86,165,167,168,169 |
| <b>F9Yproteinsitemap_site_2</b> | 1.107            | 1.149         | 168.41        | <b>Chain A:</b> 191,294,192,296,195,196,250,197,251,198,252,255,232,259,236,242,246,291,292,249,293                                                                                |
| <b>F9Yproteinsitemap_site_3</b> | 0.96             | 0.991         | 300.12        | <b>Chain A:</b> 351,129,75,106,76,107,78,79,132,133,80,316,81,136,82,83,84,85,86,87,163,165,347,348,349                                                                            |
| <b>F9Yproteinsitemap_site_4</b> | 0.892            | 0.797         | 184.19        | <b>Chain A:</b> 147,200,328,202,149,193,70,170,196,172,197,173,74,198,174,175,323,325,145,146,327                                                                                  |
| <b>F9Yproteinsitemap_site_5</b> | 0.793            | 0.77          | 218.83        | <b>Chain A:</b> 23,48,24,93,94,350,351,353,50,105,5,6,8,87,88,89,345,346,43,348,45,46,90,21,91                                                                                     |

Supplemental table S2 : Genes differentially expressed by TNF in endothelial cells

| Gene Symbol | Description                                                                                           | FC_mean     |
|-------------|-------------------------------------------------------------------------------------------------------|-------------|
| A2M         | alpha-2-macroglobulin [Source:HGNC Symbol;Acc:HGNC:7]                                                 | -1.295993   |
| AAAS        | aladin WD repeat nucleoporin [Source:HGNC Symbol;Acc:HGNC:13666]                                      | 1.2532548   |
| AADAC       | arylacetamide deacetylase [Source:HGNC Symbol;Acc:HGNC:17]                                            | 1.2346227   |
| AADAT       | aminoadipate aminotransferase [Source:HGNC Symbol;Acc:HGNC:17929]                                     | 1.1930633   |
| AASDH       | aminoadipate-semialdehyde dehydrogenase [Source:HGNC Symbol;Acc:HGNC:23993]                           | 1.2574718   |
| AASDHPPT    | lipate-semialdehyde dehydrogenase-phosphopantetheinyl transferase [Source:HGNC Symbol;Acc:HGNC:17366] | 1.4679608   |
| AASS        | aminoadipate-semialdehyde synthase [Source:HGNC Symbol;Acc:HGNC:17366]                                | 1.3107485   |
| ABAT        | 4-aminobutyrate aminotransferase [Source:HGNC Symbol;Acc:HGNC:23]                                     | 1.1162478   |
| ABCA1       | ATP binding cassette subfamily A member 1 [Source:HGNC Symbol;Acc:HGNC:29]                            | -1.23403375 |
| ABCA2       | ATP binding cassette subfamily A member 2 [Source:HGNC Symbol;Acc:HGNC:32]                            | 1.1289406   |
| ABCA7       | ATP binding cassette subfamily A member 7 [Source:HGNC Symbol;Acc:HGNC:37]                            | 1.0874552   |
| ABCB10      | ATP binding cassette subfamily B member 10 [Source:HGNC Symbol;Acc:HGNC:41]                           | 1.1608669   |
| ABCB6       | TP binding cassette subfamily B member 6 (Langereis blood group) [Source:HGNC Symbol;Acc:HGNC:47]     | 1.390825    |
| ABCB9       | ATP binding cassette subfamily B member 9 [Source:HGNC Symbol;Acc:HGNC:50]                            | 1.1446027   |
| ABCC1       | ATP binding cassette subfamily C member 1 [Source:HGNC Symbol;Acc:HGNC:51]                            | 1.1526519   |
| ABCC10      | ATP binding cassette subfamily C member 10 [Source:HGNC Symbol;Acc:HGNC:52]                           | -1.2424773  |
| ABCC13      | ATP binding cassette subfamily C member 13 (pseudogene) [Source:HGNC Symbol;Acc:HGNC:16022]           | 1.1197207   |
| ABCC4       | ATP binding cassette subfamily C member 4 [Source:HGNC Symbol;Acc:HGNC:55]                            | -1.1140414  |
| ABCC9       | ATP binding cassette subfamily C member 9 [Source:HGNC Symbol;Acc:HGNC:60]                            | 1.1195009   |
| ABCD1       | ATP binding cassette subfamily D member 1 [Source:HGNC Symbol;Acc:HGNC:61]                            | 1.3689568   |
| ABCD2       | ATP binding cassette subfamily D member 2 [Source:HGNC Symbol;Acc:HGNC:66]                            | 1.111039    |
| ABCD3       | ATP binding cassette subfamily D member 3 [Source:HGNC Symbol;Acc:HGNC:67]                            | -1.2039258  |
| ABCD4       | ATP binding cassette subfamily D member 4 [Source:HGNC Symbol;Acc:HGNC:68]                            | -1.0678612  |
| ABCF1       | ATP binding cassette subfamily F member 1 [Source:HGNC Symbol;Acc:HGNC:70]                            | -1.6139004  |
| ABCG1       | ATP binding cassette subfamily G member 1 [Source:HGNC Symbol;Acc:HGNC:73]                            | -2.2921114  |
| ABHD15      | abhydrolase domain containing 15 [Source:HGNC Symbol;Acc:HGNC:26971]                                  | 1.284376    |
| ABHD6       | abhydrolase domain containing 6 [Source:HGNC Symbol;Acc:HGNC:21398]                                   | 1.1806154   |
| ABL2        | ABL proto-oncogene 2, non-receptor tyrosine kinase [Source:HGNC Symbol;Acc:HGNC:77]                   | -1.3186278  |
| ABR         | active BCR-related [Source:HGNC Symbol;Acc:HGNC:81]                                                   | -1.40119205 |
| ABRA        | actin binding Rho activating protein [Source:HGNC Symbol;Acc:HGNC:30655]                              | 1.1575011   |
| ABT1        | activator of basal transcription 1 [Source:HGNC Symbol;Acc:HGNC:17369]                                | -1.1810149  |
| ABTB2       | ankyrin repeat and BTB domain containing 2 [Source:HGNC Symbol;Acc:HGNC:23842]                        | -2.4537582  |
| ACACB       | acetyl-CoA carboxylase beta [Source:HGNC Symbol;Acc:HGNC:85]                                          | 1.1930591   |
| ACAD9       | acyl-CoA dehydrogenase family member 9 [Source:HGNC Symbol;Acc:HGNC:21497]                            | -1.1158419  |
| ACAN        | aggrecan [Source:HGNC Symbol;Acc:HGNC:319]                                                            | -1.0911885  |
| ACBD7       | acyl-CoA binding domain containing 7 [Source:HGNC Symbol;Acc:HGNC:17715]                              | -1.0948354  |
| ACO1        | aconitase 1 [Source:HGNC Symbol;Acc:HGNC:117]                                                         | -1.3130834  |
| ACOT1       | acyl-CoA thioesterase 1 [Source:HGNC Symbol;Acc:HGNC:33128]                                           | -1.2267752  |
| ACOT13      | acyl-CoA thioesterase 13 [Source:HGNC Symbol;Acc:HGNC:20999]                                          | 1.078244    |
| ACOT4       | acyl-CoA thioesterase 4 [Source:HGNC Symbol;Acc:HGNC:19748]                                           | -1.2729762  |
| ACP2        | acid phosphatase 2, lysosomal [Source:HGNC Symbol;Acc:HGNC:123]                                       | -1.1342864  |
| ACSS1       | acyl-CoA synthetase short-chain family member 1 [Source:HGNC Symbol;Acc:HGNC:16091]                   | -1.2038226  |
| ACTL9       | actin like 9 [Source:HGNC Symbol;Acc:HGNC:28494]                                                      | -1.087294   |
| ACTN4       | actinin alpha 4 [Source:HGNC Symbol;Acc:HGNC:166]                                                     | 1.1720281   |
| ACTR3B      | ARP3 actin related protein 3 homolog B [Source:HGNC Symbol;Acc:HGNC:17256]                            | 1.0671289   |
| ACTR3C      | ARP3 actin-related protein 3 homolog C [Source:HGNC Symbol;Acc:HGNC:37282]                            | -1.1309211  |
| ACTR8       | ARP8 actin-related protein 8 homolog [Source:HGNC Symbol;Acc:HGNC:14672]                              | 1.1478686   |
| ACTRT2      | actin related protein T2 [Source:HGNC Symbol;Acc:HGNC:24026]                                          | 1.1693397   |
| ACVRL1      | activin A receptor like type 1 [Source:HGNC Symbol;Acc:HGNC:175]                                      | -1.2399968  |
| ACYP1       | acylphosphatase 1 [Source:HGNC Symbol;Acc:HGNC:179]                                                   | 1.2725029   |
| ADAL        | adenosine deaminase like [Source:HGNC Symbol;Acc:HGNC:31853]                                          | 1.1278715   |
| ADAM15      | ADAM metalloproteinase domain 15 [Source:HGNC Symbol;Acc:HGNC:193]                                    | 1.1599994   |
| ADAM19      | ADAM metalloproteinase domain 19 [Source:HGNC Symbol;Acc:HGNC:197]                                    | -1.232372   |
| ADAM28      | ADAM metalloproteinase domain 28 [Source:HGNC Symbol;Acc:HGNC:206]                                    | -1.0864991  |
| ADAM33      | ADAM metalloproteinase domain 33 [Source:HGNC Symbol;Acc:HGNC:15478]                                  | -1.1671146  |
| ADAM8       | ADAM metalloproteinase domain 8 [Source:HGNC Symbol;Acc:HGNC:215]                                     | -1.6214597  |
| ADAMTS10    | ADAM metalloproteinase with thrombospondin type 1 motif 10 [Source:HGNC Symbol;Acc:HGNC:13201]        | -1.4123731  |
| ADAMTS13    | ADAM metalloproteinase with thrombospondin type 1 motif 13 [Source:HGNC Symbol;Acc:HGNC:1366]         | 1.3268881   |
| ADAMTS14    | ADAM metalloproteinase with thrombospondin type 1 motif 14 [Source:HGNC Symbol;Acc:HGNC:14899]        | -1.1410211  |
| ADAMTS15    | ADAM metalloproteinase with thrombospondin type 1 motif 15 [Source:HGNC Symbol;Acc:HGNC:16305]        | -1.0838786  |
| ADAMTS16    | ADAM metalloproteinase with thrombospondin type 1 motif 16 [Source:HGNC Symbol;Acc:HGNC:17108]        | -1.1026491  |
| ADAMTS17    | ADAM metalloproteinase with thrombospondin type 1 motif 17 [Source:HGNC Symbol;Acc:HGNC:17109]        | -1.0519661  |
| ADAMTS19    | ADAM metalloproteinase with thrombospondin type 1 motif 19 [Source:HGNC Symbol;Acc:HGNC:17111]        | -1.2041692  |
| ADAMTS20    | ADAM metalloproteinase with thrombospondin type 1 motif 20 [Source:HGNC Symbol;Acc:HGNC:17178]        | 1.0593333   |
| ADAMTS4     | ADAM metalloproteinase with thrombospondin type 1 motif 4 [Source:HGNC Symbol;Acc:HGNC:220]           | -2.1937551  |
| ADAMTS7     | ADAM metalloproteinase with thrombospondin type 1 motif 7 [Source:HGNC Symbol;Acc:HGNC:223]           | 1.2491819   |
| ADAMTS9     | ADAM metalloproteinase with thrombospondin type 1 motif 9 [Source:HGNC Symbol;Acc:HGNC:13202]         | -1.2689196  |
| ADAMTSL1    | ADAMTS like 1 [Source:HGNC Symbol;Acc:HGNC:14632]                                                     | 1.1048983   |
| ADAMTSL2    | ADAMTS like 2 [Source:HGNC Symbol;Acc:HGNC:14631]                                                     | -1.1920514  |
| ADAMTSL3    | ADAMTS like 3 [Source:HGNC Symbol;Acc:HGNC:14633]                                                     | 1.0863901   |
| ADAMTSL4    | ADAMTS like 4 [Source:HGNC Symbol;Acc:HGNC:19706]                                                     | -1.1369889  |
| ADAP1       | ArfGAP with dual PH domains 1 [Source:HGNC Symbol;Acc:HGNC:16486]                                     | -1.2168728  |
| ADARB1      | adenosine deaminase, RNA specific B1 [Source:HGNC Symbol;Acc:HGNC:226]                                | 1.2508187   |
| ADAT2       | adenosine deaminase, tRNA specific 2 [Source:HGNC Symbol;Acc:HGNC:21172]                              | -1.4781575  |
| ADC         | antizyme inhibitor 2                                                                                  | -1.1236424  |
| ADCK3       | coenzyme Q8A                                                                                          | -1.187149   |
| ADCK4       | coenzyme Q8B                                                                                          | 1.2047751   |
| ADCY4       | adenylate cyclase 4 [Source:HGNC Symbol;Acc:HGNC:235]                                                 | -1.2466023  |
| ADCYAP1R1   | ADCYAP receptor type I [Source:HGNC Symbol;Acc:HGNC:242]                                              | -1.1824162  |
| ADH1A       | alcohol dehydrogenase 1A (class I), alpha polypeptide [Source:HGNC Symbol;Acc:HGNC:249]               | 1.0718597   |
| ADH5        | alcohol dehydrogenase 5 (class III), chi polypeptide [Source:HGNC Symbol;Acc:HGNC:253]                | 1.2090188   |
| ADH6        | alcohol dehydrogenase 6 (class V) [Source:HGNC Symbol;Acc:HGNC:255]                                   | 1.11222915  |
| ADK         | adenosine kinase [Source:HGNC Symbol;Acc:HGNC:257]                                                    | 1.1093177   |

|           |                                                                                                      |            |
|-----------|------------------------------------------------------------------------------------------------------|------------|
| ADM       | adrenomedullin [Source:HGNC Symbol;Acc:HGNC:259]                                                     | 1.7993667  |
| ADNP      | activity dependent neuroprotector homeobox [Source:HGNC Symbol;Acc:HGNC:15766]                       | 1.3423048  |
| ADO       | 2-aminoethanethiol dioxygenase [Source:HGNC Symbol;Acc:HGNC:23506]                                   | 1.2320936  |
| ADPRH     | ADP-ribosylarginine hydrolase [Source:HGNC Symbol;Acc:HGNC:269]                                      | -1.3570276 |
| ADPRHL2   | ADP-ribosylhydrolase like 2 [Source:HGNC Symbol;Acc:HGNC:21304]                                      | -1.3022674 |
| ADRA1B    | adrenoceptor alpha 1B [Source:HGNC Symbol;Acc:HGNC:278]                                              | 1.5798137  |
| ADRA1D    | adrenoceptor alpha 1D [Source:HGNC Symbol;Acc:HGNC:280]                                              | 1.1034441  |
| ADRB1     | adrenoceptor beta 1 [Source:HGNC Symbol;Acc:HGNC:285]                                                | 1.4576823  |
| ADRB3     | adrenoceptor beta 3 [Source:HGNC Symbol;Acc:HGNC:288]                                                | -1.1099663 |
| ADSS      | adenylosuccinate synthase [Source:HGNC Symbol;Acc:HGNC:292]                                          | 1.4793819  |
| AFAP1L1   | actin filament associated protein 1 like 1 [Source:HGNC Symbol;Acc:HGNC:26714]                       | -1.1824666 |
| AF2       | AF4/FMR2 family member 2 [Source:HGNC Symbol;Acc:HGNC:3776]                                          | -1.119592  |
| AFMID     | arylformamidase [Source:HGNC Symbol;Acc:HGNC:20910]                                                  | 1.0874438  |
| AGAP1     | ArfGAP with GTPase domain, ankyrin repeat and PH domain 1 [Source:HGNC Symbol;Acc:HGNC:16922]        | -1.1519274 |
| AGAP2     | ArfGAP with GTPase domain, ankyrin repeat and PH domain 2 [Source:HGNC Symbol;Acc:HGNC:16921]        | 1.2381144  |
| AGAP3     | ArfGAP with GTPase domain, ankyrin repeat and PH domain 3 [Source:HGNC Symbol;Acc:HGNC:16923]        | 1.0960298  |
| AGER      | advanced glycosylation end-product specific receptor [Source:HGNC Symbol;Acc:HGNC:320]               | 1.12015    |
| AGFG1     | ArfGAP with FG repeats 1 [Source:HGNC Symbol;Acc:HGNC:5175]                                          | -1.0805941 |
| AGPAT1    | 1-acylglycerol-3-phosphate O-acyltransferase 1 [Source:HGNC Symbol;Acc:HGNC:324]                     | 1.2362485  |
| AGPAT3    | 1-acylglycerol-3-phosphate O-acyltransferase 3 [Source:HGNC Symbol;Acc:HGNC:326]                     | -1.1128453 |
| AGPAT6    | glycerol-3-phosphate acyltransferase 4                                                               | -1.3704916 |
| AGPAT9    | lysophosphatidylcholine acyltransferase 1                                                            | 1.5517836  |
| AGPS      | alkylglycerone phosphate synthase [Source:HGNC Symbol;Acc:HGNC:327]                                  | 1.3030115  |
| AGRN      | agrin [Source:HGNC Symbol;Acc:HGNC:329]                                                              | -1.450005  |
| AGSK1     | golgin A2 pseudogene 10                                                                              | 1.1697268  |
| AGXT2     | alanine-glyoxylate aminotransferase 2 [Source:HGNC Symbol;Acc:HGNC:14412]                            | 1.1135411  |
| AGXT2L2   | 5-phosphohydroxy-L-lysine phospho-lyase                                                              | -1.1433324 |
| AHCYL1    | adenosylhomocysteinase like 1 [Source:HGNC Symbol;Acc:HGNC:344]                                      | -1.2469922 |
| AHD01     | AT-hook DNA binding motif containing 1 [Source:HGNC Symbol;Acc:HGNC:25230]                           | -2.3617847 |
| AHR       | aryl hydrocarbon receptor [Source:HGNC Symbol;Acc:HGNC:348]                                          | 1.2535999  |
| AHRR      | aryl-hydrocarbon receptor repressor [Source:HGNC Symbol;Acc:HGNC:346]                                | -1.3035115 |
| AHSA2     | 1, activator of heat shock 90kDa protein ATPase homolog 2 (yeast) [Source:HGNC Symbol;Acc:HGNC:20]   | 1.2514814  |
| AIF1      | allograft inflammatory factor 1 [Source:HGNC Symbol;Acc:HGNC:352]                                    | -1.1333927 |
| AIF1L     | allograft inflammatory factor 1 like [Source:HGNC Symbol;Acc:HGNC:28904]                             | -1.1981606 |
| AIG1      | androgen induced 1 [Source:HGNC Symbol;Acc:HGNC:21607]                                               | -1.16302   |
| AIM2      | absent in melanoma 2 [Source:HGNC Symbol;Acc:HGNC:357]                                               | 1.1194698  |
| AIMP1     | acyl tRNA synthetase complex interacting multifunctional protein 1 [Source:HGNC Symbol;Acc:HGNC:1]   | 1.2470869  |
| AIPL1     | aryl hydrocarbon receptor interacting protein like 1 [Source:HGNC Symbol;Acc:HGNC:359]               | 1.0694968  |
| AK3       | adenylate kinase 3 [Source:HGNC Symbol;Acc:HGNC:17376]                                               | 1.2033451  |
| AKAP17A   | A-kinase anchoring protein 17A [Source:HGNC Symbol;Acc:HGNC:18783]                                   | -1.1262562 |
| AKAP2     | A-kinase anchoring protein 2 [Source:HGNC Symbol;Acc:HGNC:372]                                       | -1.1450834 |
| AKAP8     | A-kinase anchoring protein 8 [Source:HGNC Symbol;Acc:HGNC:378]                                       | 1.1265244  |
| AKD1      | adenylate kinase 9                                                                                   | -1.1273862 |
| AKIRIN1   | akirin 1 [Source:HGNC Symbol;Acc:HGNC:25744]                                                         | -1.2322332 |
| AKIRIN2   | akirin 2 [Source:HGNC Symbol;Acc:HGNC:21407]                                                         | -1.2217575 |
| AKNA      | AT-hook transcription factor [Source:HGNC Symbol;Acc:HGNC:24108]                                     | -1.1536517 |
| AKT1      | AKT serine/threonine kinase 1 [Source:HGNC Symbol;Acc:HGNC:391]                                      | 1.134962   |
| AKT1S1    | AKT1 substrate 1 [Source:HGNC Symbol;Acc:HGNC:28426]                                                 | 1.2209451  |
| ALAD      | aminolevulinate dehydratase [Source:HGNC Symbol;Acc:HGNC:395]                                        | -1.1701211 |
| ALAS1     | 5'-aminolevulinate synthase 1 [Source:HGNC Symbol;Acc:HGNC:396]                                      | -1.4068297 |
| ALDH1A3   | aldehyde dehydrogenase 1 family member A3 [Source:HGNC Symbol;Acc:HGNC:409]                          | -1.1932596 |
| ALDH3B1   | aldehyde dehydrogenase 3 family member B1 [Source:HGNC Symbol;Acc:HGNC:410]                          | -1.1427356 |
| ALDH7A1   | aldehyde dehydrogenase 7 family member A1 [Source:HGNC Symbol;Acc:HGNC:877]                          | 1.0728403  |
| ALG2      | ALG2, alpha-1,3/1,6-mannosyltransferase [Source:HGNC Symbol;Acc:HGNC:23159]                          | -1.3034068 |
| ALG6      | ALG6, alpha-1,3-glucosyltransferase [Source:HGNC Symbol;Acc:HGNC:23157]                              | 1.1889843  |
| ALG8      | ALG8, alpha-1,3-glucosyltransferase [Source:HGNC Symbol;Acc:HGNC:23161]                              | -1.238926  |
| ALKB1     | alkB homolog 1, histone H2A dioxygenase [Source:HGNC Symbol;Acc:HGNC:17911]                          | -1.1765679 |
| ALKBH5    | alkB homolog 5, RNA demethylase [Source:HGNC Symbol;Acc:HGNC:25996]                                  | 1.1238653  |
| ALOX15    | arachidonate 15-lipoxygenase [Source:HGNC Symbol;Acc:HGNC:433]                                       | -1.1474167 |
| ALPK1     | alpha kinase 1 [Source:HGNC Symbol;Acc:HGNC:20917]                                                   | -1.1219901 |
| ALPK3     | alpha kinase 3 [Source:HGNC Symbol;Acc:HGNC:17574]                                                   | -1.1666327 |
| ALPP      | alkaline phosphatase, placental [Source:HGNC Symbol;Acc:HGNC:439]                                    | -1.147836  |
| ALS2      | ALS2, alsin Rho guanine nucleotide exchange factor [Source:HGNC Symbol;Acc:HGNC:443]                 | 1.1730324  |
| ALS2CL    | ALS2 C-terminal like [Source:HGNC Symbol;Acc:HGNC:20605]                                             | -1.6029048 |
| ALX1      | ALX homeobox 1 [Source:HGNC Symbol;Acc:HGNC:1494]                                                    | 1.4387568  |
| AMBN      | ameloblastin [Source:HGNC Symbol;Acc:HGNC:452]                                                       | -1.1854475 |
| AMBRA1    | autophagy and beclin 1 regulator 1 [Source:HGNC Symbol;Acc:HGNC:25990]                               | -1.2786399 |
| AMD1      | adenosylmethionine decarboxylase 1 [Source:HGNC Symbol;Acc:HGNC:457]                                 | 1.7828411  |
| AMELX     | amelogenin, X-linked [Source:HGNC Symbol;Acc:HGNC:461]                                               | -1.090403  |
| AMHR2     | anti-Mullerian hormone receptor type 2 [Source:HGNC Symbol;Acc:HGNC:465]                             | -1.0604098 |
| AMICA1    | junction adhesion molecule like                                                                      | 1.0956241  |
| AMMECR1   | ental retardation, midface hypoplasia and elliptocytosis chromosomal region gene 1 [Source:HGNC Symn | -1.3696743 |
| AMOT      | angiominin [Source:HGNC Symbol;Acc:HGNC:17810]                                                       | 1.100864   |
| AMOTL2    | angiominin like 2 [Source:HGNC Symbol;Acc:HGNC:17812]                                                | 1.0528084  |
| ANAPC13   | anaphase promoting complex subunit 13 [Source:HGNC Symbol;Acc:HGNC:24540]                            | 1.1336751  |
| ANGPT1    | angiopoietin 1 [Source:HGNC Symbol;Acc:HGNC:484]                                                     | 1.1155918  |
| ANGPTL4   | angiopoietin like 4 [Source:HGNC Symbol;Acc:HGNC:16039]                                              | 1.940775   |
| ANGPTL5   | angiopoietin like 5 [Source:HGNC Symbol;Acc:HGNC:19705]                                              | 1.1307821  |
| ANK1      | ankyrin 1 [Source:HGNC Symbol;Acc:HGNC:492]                                                          | -1.1840773 |
| ANKFY1    | ankyrin repeat and FYVE domain containing 1 [Source:HGNC Symbol;Acc:HGNC:20763]                      | -1.2805209 |
| ANKH      | ANKH inorganic pyrophosphate transport regulator [Source:HGNC Symbol;Acc:HGNC:15492]                 | 1.1340746  |
| ANKK1     | ankyrin repeat and kinase domain containing 1 [Source:HGNC Symbol;Acc:HGNC:21027]                    | -1.1366614 |
| ANKLE2    | ankyrin repeat and LEM domain containing 2 [Source:HGNC Symbol;Acc:HGNC:29101]                       | -1.5028042 |
| ANKRD11   | ankyrin repeat domain 11 [Source:HGNC Symbol;Acc:HGNC:21316]                                         | 1.1364534  |
| ANKRD13D  | ankyrin repeat domain 13D [Source:HGNC Symbol;Acc:HGNC:27880]                                        | 1.1911414  |
| ANKRD20A2 | ankyrin repeat domain 20 family member A2 [Source:HGNC Symbol;Acc:HGNC:31979]                        | 1.32748785 |

|            |                                                                                                                |             |
|------------|----------------------------------------------------------------------------------------------------------------|-------------|
| ANKRD20A9P | ankyrin repeat domain 20 family member A9, pseudogene [Source:HGNC Symbol;Acc:HGNC:42023]                      | 1.1827317   |
| ANKRD23    | ankyrin repeat domain 23 [Source:HGNC Symbol;Acc:HGNC:24470]                                                   | -1.1301494  |
| ANKRD26    | ankyrin repeat domain 26 [Source:HGNC Symbol;Acc:HGNC:29186]                                                   | 1.1245983   |
| ANKRD27    | ankyrin repeat domain 27 [Source:HGNC Symbol;Acc:HGNC:25310]                                                   | -1.39345035 |
| ANKRD28    | ankyrin repeat domain 28 [Source:HGNC Symbol;Acc:HGNC:29024]                                                   | 1.4562614   |
| ANKRD30BL  | ankyrin repeat domain 30B-like [Source:HGNC Symbol;Acc:HGNC:35167]                                             | -1.0791416  |
| ANKRD30BP2 | ankyrin repeat domain 30B pseudogene 2 [Source:HGNC Symbol;Acc:HGNC:16620]                                     | 1.1488045   |
| ANKRD33B   | ankyrin repeat domain 33B [Source:HGNC Symbol;Acc:HGNC:35240]                                                  | -1.3332356  |
| ANKRD35    | ankyrin repeat domain 35 [Source:HGNC Symbol;Acc:HGNC:26323]                                                   | 1.4072214   |
| ANKS1A     | ankyrin repeat and sterile alpha motif domain containing 1A [Source:HGNC Symbol;Acc:HGNC:20961]                | 1.2282481   |
| ANKS3      | ankyrin repeat and sterile alpha motif domain containing 3 [Source:HGNC Symbol;Acc:HGNC:29422]                 | 1.1742829   |
| ANO10      | anoctamin 10 [Source:HGNC Symbol;Acc:HGNC:25519]                                                               | -1.1463088  |
| ANO2       | anoctamin 2 [Source:HGNC Symbol;Acc:HGNC:1183]                                                                 | 1.2004906   |
| ANO4       | anoctamin 4 [Source:HGNC Symbol;Acc:HGNC:23837]                                                                | 1.1382886   |
| ANO8       | anoctamin 8 [Source:HGNC Symbol;Acc:HGNC:29329]                                                                | 1.0660795   |
| ANO9       | anoctamin 9 [Source:HGNC Symbol;Acc:HGNC:20679]                                                                | -1.5962213  |
| ANP32A     | acidic nuclear phosphoprotein 32 family member A [Source:HGNC Symbol;Acc:HGNC:13233]                           | 1.1652434   |
| ANP32D     | acidic nuclear phosphoprotein 32 family member D [Source:HGNC Symbol;Acc:HGNC:16676]                           | 1.2596217   |
| ANTXRL     | anthrax toxin receptor-like [Source:HGNC Symbol;Acc:HGNC:27277]                                                | 1.1517117   |
| ANXA1      | annexin A1 [Source:HGNC Symbol;Acc:HGNC:533]                                                                   | 1.6887745   |
| ANXA11     | annexin A11 [Source:HGNC Symbol;Acc:HGNC:535]                                                                  | -1.1404953  |
| AOC2       | amine oxidase, copper containing 2 [Source:HGNC Symbol;Acc:HGNC:549]                                           | 1.2001185   |
| AOX1       | aldehyde oxidase 1 [Source:HGNC Symbol;Acc:HGNC:553]                                                           | -1.1059792  |
| APIAR      | daptor related protein complex 1 associated regulatory protein [Source:HGNC Symbol;Acc:HGNC:2880]              | 1.3158482   |
| APIB1      | adaptor related protein complex 1 beta 1 subunit [Source:HGNC Symbol;Acc:HGNC:554]                             | 1.1775063   |
| API51      | adaptor related protein complex 1 sigma 1 subunit [Source:HGNC Symbol;Acc:HGNC:559]                            | 1.3231467   |
| API52      | adaptor related protein complex 1 sigma 2 subunit [Source:HGNC Symbol;Acc:HGNC:560]                            | 1.2719432   |
| API53      | adaptor related protein complex 1 sigma 3 subunit [Source:HGNC Symbol;Acc:HGNC:18971]                          | -1.1543322  |
| AP2A1      | adaptor related protein complex 2 alpha 1 subunit [Source:HGNC Symbol;Acc:HGNC:561]                            | 1.3732315   |
| AP3D1      | adaptor related protein complex 3 delta 1 subunit [Source:HGNC Symbol;Acc:HGNC:568]                            | -1.247038   |
| AP3M2      | adaptor related protein complex 3 mu 2 subunit [Source:HGNC Symbol;Acc:HGNC:570]                               | 1.2480363   |
| AP3S2      | adaptor related protein complex 3 sigma 2 subunit [Source:HGNC Symbol;Acc:HGNC:571]                            | -1.2104422  |
| AP4B1      | adaptor related protein complex 4 beta 1 subunit [Source:HGNC Symbol;Acc:HGNC:572]                             | 1.1523722   |
| APBA3      | amyloid beta precursor protein binding family A member 3 [Source:HGNC Symbol;Acc:HGNC:580]                     | -1.5584203  |
| APCDD1     | APC down-regulated 1 [Source:HGNC Symbol;Acc:HGNC:15718]                                                       | 1.4026713   |
| APLN       | apelin [Source:HGNC Symbol;Acc:HGNC:16665]                                                                     | 1.8412083   |
| APOA4      | apolipoprotein A4 [Source:HGNC Symbol;Acc:HGNC:602]                                                            | -1.0561597  |
| APOA5      | apolipoprotein A5 [Source:HGNC Symbol;Acc:HGNC:17288]                                                          | -1.1250774  |
| APOB       | apolipoprotein B [Source:HGNC Symbol;Acc:HGNC:603]                                                             | 1.0794657   |
| APOBEC3B   | apolipoprotein B mRNA editing enzyme catalytic subunit 3B [Source:HGNC Symbol;Acc:HGNC:17352]                  | -1.1613922  |
| APOBEC3C   | apolipoprotein B mRNA editing enzyme catalytic subunit 3C [Source:HGNC Symbol;Acc:HGNC:17353]                  | 1.1980796   |
| APOBEC3G   | apolipoprotein B mRNA editing enzyme catalytic subunit 3G [Source:HGNC Symbol;Acc:HGNC:17357]                  | -1.2448577  |
| APOC3      | apolipoprotein C3 [Source:HGNC Symbol;Acc:HGNC:610]                                                            | 1.0713217   |
| APOC4      | apolipoprotein C4 [Source:HGNC Symbol;Acc:HGNC:611]                                                            | -1.0723298  |
| APOL2      | apolipoprotein L2 [Source:HGNC Symbol;Acc:HGNC:619]                                                            | -2.0766153  |
| APOL3      | apolipoprotein L3 [Source:HGNC Symbol;Acc:HGNC:14868]                                                          | -2.6731124  |
| APOL4      | apolipoprotein L4 [Source:HGNC Symbol;Acc:HGNC:14867]                                                          | -2.1201253  |
| APOL5      | apolipoprotein L5 [Source:HGNC Symbol;Acc:HGNC:14869]                                                          | 1.242814    |
| APOL6      | apolipoprotein L6 [Source:HGNC Symbol;Acc:HGNC:14870]                                                          | -1.84664745 |
| APPL2      | rotein, phosphotyrosine interacting with PH domain and leucine zipper 2 [Source:HGNC Symbol;Acc:HGNC:11289085] | 1.1289085   |
| AQP2       | aquaporin 2 [Source:HGNC Symbol;Acc:HGNC:634]                                                                  | -1.1617019  |
| AQP6       | aquaporin 6 [Source:HGNC Symbol;Acc:HGNC:639]                                                                  | -1.0822448  |
| AQP7P1     | aquaporin 7 pseudogene 1 [Source:HGNC Symbol;Acc:HGNC:32048]                                                   | -1.1152661  |
| AQP9       | aquaporin 9 [Source:HGNC Symbol;Acc:HGNC:643]                                                                  | 1.0620369   |
| ARAP3      | ArfGAP with RhoGAP domain, ankyrin repeat and PH domain 3 [Source:HGNC Symbol;Acc:HGNC:24097]                  | 1.2647666   |
| ARF3       | ADP ribosylation factor 3 [Source:HGNC Symbol;Acc:HGNC:654]                                                    | -1.23373055 |
| ARFRP1     | ADP ribosylation factor related protein 1 [Source:HGNC Symbol;Acc:HGNC:662]                                    | -1.3252905  |
| ARG1       | arginase 1 [Source:HGNC Symbol;Acc:HGNC:663]                                                                   | 1.0760386   |
| ARGFX      | arginine-fifty homeobox [Source:HGNC Symbol;Acc:HGNC:30146]                                                    | -1.1389344  |
| ARHGAP12   | Rho GTPase activating protein 12 [Source:HGNC Symbol;Acc:HGNC:16348]                                           | 1.5420827   |
| ARHGAP18   | Rho GTPase activating protein 18 [Source:HGNC Symbol;Acc:HGNC:21035]                                           | 2.1440883   |
| ARHGAP19   | Rho GTPase activating protein 19 [Source:HGNC Symbol;Acc:HGNC:23724]                                           | -1.13050945 |
| ARHGAP20   | Rho GTPase activating protein 20 [Source:HGNC Symbol;Acc:HGNC:18357]                                           | 1.1477607   |
| ARHGAP22   | Rho GTPase activating protein 22 [Source:HGNC Symbol;Acc:HGNC:30320]                                           | -1.3118076  |
| ARHGAP24   | Rho GTPase activating protein 24 [Source:HGNC Symbol;Acc:HGNC:25361]                                           | 1.4855636   |
| ARHGAP25   | Rho GTPase activating protein 25 [Source:HGNC Symbol;Acc:HGNC:28951]                                           | -1.2206204  |
| ARHGAP31   | Rho GTPase activating protein 31 [Source:HGNC Symbol;Acc:HGNC:29216]                                           | -1.9456972  |
| ARHGAP32   | Rho GTPase activating protein 32 [Source:HGNC Symbol;Acc:HGNC:17399]                                           | -1.3427783  |
| ARHGAP35   | Rho GTPase activating protein 35 [Source:HGNC Symbol;Acc:HGNC:4591]                                            | 1.1647383   |
| ARHGAP36   | Rho GTPase activating protein 36 [Source:HGNC Symbol;Acc:HGNC:26388]                                           | 1.0910088   |
| ARHGAP5    | Rho GTPase activating protein 5 [Source:HGNC Symbol;Acc:HGNC:675]                                              | 1.1743265   |
| ARHGAP6    | Rho GTPase activating protein 6 [Source:HGNC Symbol;Acc:HGNC:676]                                              | -1.1165998  |
| ARHGEF10L  | Rho guanine nucleotide exchange factor 10 like [Source:HGNC Symbol;Acc:HGNC:25540]                             | -1.32104525 |
| ARHGEF12   | Rho guanine nucleotide exchange factor 12 [Source:HGNC Symbol;Acc:HGNC:14193]                                  | 1.1657554   |
| ARHGEF15   | Rho guanine nucleotide exchange factor 15 [Source:HGNC Symbol;Acc:HGNC:15590]                                  | -1.285653   |
| ARHGEF16   | Rho guanine nucleotide exchange factor 16 [Source:HGNC Symbol;Acc:HGNC:15515]                                  | -1.709941   |
| ARHGEF17   | Rho guanine nucleotide exchange factor 17 [Source:HGNC Symbol;Acc:HGNC:21726]                                  | 1.210676    |
| ARHGEF26   | Rho guanine nucleotide exchange factor 26 [Source:HGNC Symbol;Acc:HGNC:24490]                                  | 1.1715456   |
| ARHGEF37   | Rho guanine nucleotide exchange factor 37 [Source:HGNC Symbol;Acc:HGNC:34430]                                  | 1.2946156   |
| ARHGEF38   | Rho guanine nucleotide exchange factor 38 [Source:HGNC Symbol;Acc:HGNC:25968]                                  | 1.103191    |
| ARHGEF40   | Rho guanine nucleotide exchange factor 40 [Source:HGNC Symbol;Acc:HGNC:25516]                                  | -3.796834   |
| ARHGEF6    | Rac/Cdc42 guanine nucleotide exchange factor 6 [Source:HGNC Symbol;Acc:HGNC:685]                               | 1.0740124   |
| ARHGEF7    | Rho guanine nucleotide exchange factor 7 [Source:HGNC Symbol;Acc:HGNC:15607]                                   | -1.17362945 |
| ARID1B     | AT-rich interaction domain 1B [Source:HGNC Symbol;Acc:HGNC:18040]                                              | -1.1709648  |
| ARID3B     | AT-rich interaction domain 3B [Source:HGNC Symbol;Acc:HGNC:14350]                                              | -1.6698583  |
| ARID5A     | AT-rich interaction domain 5A [Source:HGNC Symbol;Acc:HGNC:17361]                                              | -1.5348624  |

|            |                                                                                                                  |             |
|------------|------------------------------------------------------------------------------------------------------------------|-------------|
| ARL17B     | ADP ribosylation factor like GTPase 2 binding protein [Source:HGNC Symbol;Acc:HGNC:32387]                        | -1.2318981  |
| ARL2BP     | ADP ribosylation factor like GTPase 2 binding protein [Source:HGNC Symbol;Acc:HGNC:17146]                        | -1.3956972  |
| ARL4A      | ADP ribosylation factor like GTPase 4A [Source:HGNC Symbol;Acc:HGNC:695]                                         | -1.2045508  |
| ARL4C      | ADP ribosylation factor like GTPase 4C [Source:HGNC Symbol;Acc:HGNC:698]                                         | -1.4356825  |
| ARL5A      | ADP ribosylation factor like GTPase 5A [Source:HGNC Symbol;Acc:HGNC:696]                                         | 1.4994498   |
| ARL5C      | ADP ribosylation factor like GTPase 5C [Source:HGNC Symbol;Acc:HGNC:31111]                                       | -1.1733562  |
| ARL6IP5    | ADP ribosylation factor like GTPase 6 interacting protein 5 [Source:HGNC Symbol;Acc:HGNC:16937]                  | -1.3173611  |
| ARL8A      | ADP ribosylation factor like GTPase 8A [Source:HGNC Symbol;Acc:HGNC:25192]                                       | 1.1317644   |
| ARMC1      | armadillo repeat containing 1 [Source:HGNC Symbol;Acc:HGNC:17684]                                                | 1.3632983   |
| ARMC4      | armadillo repeat containing 4 [Source:HGNC Symbol;Acc:HGNC:25583]                                                | 1.1648505   |
| ARMC8      | armadillo repeat containing 8 [Source:HGNC Symbol;Acc:HGNC:24999]                                                | 1.3305542   |
| ARMC9      | armadillo repeat containing 9 [Source:HGNC Symbol;Acc:HGNC:20730]                                                | -1.1706734  |
| ARMCX6     | armadillo repeat containing, X-linked 6 [Source:HGNC Symbol;Acc:HGNC:26094]                                      | -1.0861462  |
| ARNT2      | aryl hydrocarbon receptor nuclear translocator 2 [Source:HGNC Symbol;Acc:HGNC:16876]                             | -1.1736228  |
| ARNTL      | aryl hydrocarbon receptor nuclear translocator like [Source:HGNC Symbol;Acc:HGNC:701]                            | -1.0527279  |
| ARPC1A     | actin related protein 2/3 complex subunit 1A [Source:HGNC Symbol;Acc:HGNC:703]                                   | 1.2115438   |
| ARPM1      | actin related protein T3                                                                                         | -1.0826732  |
| ARPP19     | cAMP regulated phosphoprotein 19 [Source:HGNC Symbol;Acc:HGNC:16967]                                             | 1.322349    |
| ARRB1      | arrestin beta 1 [Source:HGNC Symbol;Acc:HGNC:711]                                                                | -1.6861901  |
| ARRDC2     | arrestin domain containing 2 [Source:HGNC Symbol;Acc:HGNC:25225]                                                 | -1.4012861  |
| ARRDC3     | arrestin domain containing 3 [Source:HGNC Symbol;Acc:HGNC:29263]                                                 | 1.2088153   |
| ARSD       | arylsulfatase D [Source:HGNC Symbol;Acc:HGNC:717]                                                                | -1.2720516  |
| ART1       | ADP-ribosyltransferase 1 [Source:HGNC Symbol;Acc:HGNC:723]                                                       | -1.0607938  |
| ART4       | ADP-ribosyltransferase 4 (Dombrock blood group) [Source:HGNC Symbol;Acc:HGNC:726]                                | -2.2783897  |
| ART5       | ADP-ribosyltransferase 5 [Source:HGNC Symbol;Acc:HGNC:24049]                                                     | -1.1922164  |
| ASAH2      | N-acylsphingosine amidohydrolase 2 [Source:HGNC Symbol;Acc:HGNC:18860]                                           | 1.1645775   |
| ASB13      | ankyrin repeat and SOCS box containing 13 [Source:HGNC Symbol;Acc:HGNC:19765]                                    | 1.423418    |
| ASB17      | ankyrin repeat and SOCS box containing 17 [Source:HGNC Symbol;Acc:HGNC:19769]                                    | 1.1808741   |
| ASB7       | ankyrin repeat and SOCS box containing 7 [Source:HGNC Symbol;Acc:HGNC:17182]                                     | -1.2424747  |
| ASGR1      | asialoglycoprotein receptor 1 [Source:HGNC Symbol;Acc:HGNC:742]                                                  | -1.1838837  |
| ASIC1      | acid sensing ion channel subunit 1                                                                               | 1.1748358   |
| ASIP       | agouti signaling protein [Source:HGNC Symbol;Acc:HGNC:745]                                                       | -1.0596741  |
| ASNA1      | arsA arsenite transporter, ATP-binding, homolog 1 (bacterial) [Source:HGNC Symbol;Acc:HGNC:752]                  | 1.2656978   |
| ASNSD1     | asparagine synthetase domain containing 1 [Source:HGNC Symbol;Acc:HGNC:24910]                                    | 1.5138249   |
| ASPH       | aspartate beta-hydroxylase [Source:HGNC Symbol;Acc:HGNC:757]                                                     | 1.3792418   |
| ASPHD2     | aspartate beta-hydroxylase domain containing 2 [Source:HGNC Symbol;Acc:HGNC:30437]                               | -1.2865282  |
| ASPSCR1    | ASPSCR1, UBX domain containing tether for SLC2A4 [Source:HGNC Symbol;Acc:HGNC:13825]                             | -1.0610112  |
| ASS1       | argininosuccinate synthase 1 [Source:HGNC Symbol;Acc:HGNC:758]                                                   | -1.07619    |
| ASTN2      | astrotactin 2 [Source:HGNC Symbol;Acc:HGNC:17021]                                                                | 1.1385942   |
| ATAD2      | ATPase family, AAA domain containing 2 [Source:HGNC Symbol;Acc:HGNC:30123]                                       | 1.5684117   |
| ATAD3B     | ATPase family, AAA domain containing 3B [Source:HGNC Symbol;Acc:HGNC:24007]                                      | 1.1467226   |
| ATF1       | activating transcription factor 1 [Source:HGNC Symbol;Acc:HGNC:783]                                              | 1.1707162   |
| ATF3       | activating transcription factor 3 [Source:HGNC Symbol;Acc:HGNC:785]                                              | -2.5273751  |
| ATF5       | activating transcription factor 5 [Source:HGNC Symbol;Acc:HGNC:790]                                              | -1.2639709  |
| ATF6       | activating transcription factor 6 [Source:HGNC Symbol;Acc:HGNC:791]                                              | -1.2513235  |
| ATF7IP2    | activating transcription factor 7 interacting protein 2 [Source:HGNC Symbol;Acc:HGNC:20397]                      | 1.3261163   |
| ATG13      | autophagy related 13 [Source:HGNC Symbol;Acc:HGNC:29091]                                                         | -1.2528231  |
| ATG14      | autophagy related 14 [Source:HGNC Symbol;Acc:HGNC:19962]                                                         | 1.1349314   |
| ATG16L2    | autophagy related 16 like 2 [Source:HGNC Symbol;Acc:HGNC:25464]                                                  | -1.2765108  |
| ATG4A      | autophagy related 4A cysteine peptidase [Source:HGNC Symbol;Acc:HGNC:16489]                                      | 1.3133653   |
| ATG7       | autophagy related 7 [Source:HGNC Symbol;Acc:HGNC:16935]                                                          | -1.2043744  |
| ATMIN      | ATM interactor [Source:HGNC Symbol;Acc:HGNC:29034]                                                               | 1.2705523   |
| ATP11B     | ATPase phospholipid transporting 11B (putative) [Source:HGNC Symbol;Acc:HGNC:13553]                              | 1.1881589   |
| ATP1A4     | ATPase Na <sup>+</sup> /K <sup>+</sup> transporting subunit alpha 4 [Source:HGNC Symbol;Acc:HGNC:14073]          | -1.1978463  |
| ATP1B1     | ATPase Na <sup>+</sup> /K <sup>+</sup> transporting subunit beta 1 [Source:HGNC Symbol;Acc:HGNC:804]             | -1.9287975  |
| ATP2A1     | ATPase sarcoplasmic/endoplasmic reticulum Ca <sup>2+</sup> transporting 1 [Source:HGNC Symbol;Acc:HGNC:811]      | 1.1828079   |
| ATP2B4     | ATPase plasma membrane Ca <sup>2+</sup> transporting 4 [Source:HGNC Symbol;Acc:HGNC:817]                         | -1.1585565  |
| ATP4B      | ATPase H <sup>+</sup> /K <sup>+</sup> transporting beta subunit [Source:HGNC Symbol;Acc:HGNC:820]                | 1.1430212   |
| ATP5D      | synthase, H <sup>+</sup> transporting, mitochondrial F1 complex, delta subunit [Source:HGNC Symbol;Acc:HGNC:818] | -1.1162703  |
| ATP5H      | TP synthase, H <sup>+</sup> transporting, mitochondrial Fo complex subunit D [Source:HGNC Symbol;Acc:HGNC:841]   | 1.0855707   |
| ATP5I      | TP synthase, H <sup>+</sup> transporting, mitochondrial Fo complex subunit E [Source:HGNC Symbol;Acc:HGNC:841]   | -1.1508979  |
| ATP6AP1    | ATPase H <sup>+</sup> transporting accessory protein 1 [Source:HGNC Symbol;Acc:HGNC:868]                         | -1.0536419  |
| ATP6AP1L   | ATPase H <sup>+</sup> transporting accessory protein 1 like [Source:HGNC Symbol;Acc:HGNC:28091]                  | 1.2490357   |
| ATP6VOA1   | ATPase H <sup>+</sup> transporting V0 subunit a1 [Source:HGNC Symbol;Acc:HGNC:865]                               | 1.1078784   |
| ATP6VOD1   | ATPase H <sup>+</sup> transporting V0 subunit d1 [Source:HGNC Symbol;Acc:HGNC:13724]                             | -1.1738416  |
| ATP6VOE1   | ATPase H <sup>+</sup> transporting V0 subunit e1 [Source:HGNC Symbol;Acc:HGNC:863]                               | -1.0720892  |
| ATP6VIC1   | ATPase H <sup>+</sup> transporting V1 subunit C1 [Source:HGNC Symbol;Acc:HGNC:856]                               | 1.3770074   |
| ATP6VIE1   | ATPase H <sup>+</sup> transporting V1 subunit E1 [Source:HGNC Symbol;Acc:HGNC:857]                               | -1.0743483  |
| ATP6VIG2   | ATPase H <sup>+</sup> transporting V1 subunit G2 [Source:HGNC Symbol;Acc:HGNC:862]                               | -1.1512762  |
| ATP6VIG3   | ATPase H <sup>+</sup> transporting V1 subunit G3 [Source:HGNC Symbol;Acc:HGNC:18265]                             | 1.1707712   |
| ATP7A      | ATPase copper transporting alpha [Source:HGNC Symbol;Acc:HGNC:869]                                               | 1.3624587   |
| ATP8B2     | ATPase phospholipid transporting 8B2 [Source:HGNC Symbol;Acc:HGNC:13534]                                         | -1.2168714  |
| ATP8B3     | ATPase phospholipid transporting 8B3 [Source:HGNC Symbol;Acc:HGNC:13535]                                         | 1.1277881   |
| ATP8B5P    | ATPase phospholipid transporting 8B5, pseudogene [Source:HGNC Symbol;Acc:HGNC:27245]                             | 1.1684906   |
| ATP9B      | ATPase phospholipid transporting 9B (putative) [Source:HGNC Symbol;Acc:HGNC:13541]                               | -1.1588206  |
| ATPAF1-AS1 | testis expressed 38                                                                                              | 1.136972    |
| ATPIF1     | ATPase inhibitory factor 1 [Source:HGNC Symbol;Acc:HGNC:871]                                                     | 1.1442711   |
| ATRNL1     | attractin like 1 [Source:HGNC Symbol;Acc:HGNC:29063]                                                             | -1.1539842  |
| ATXN2L     | ataxin 2 like [Source:HGNC Symbol;Acc:HGNC:31326]                                                                | -1.23803355 |
| ATXN3L     | ataxin 3 like [Source:HGNC Symbol;Acc:HGNC:24173]                                                                | 1.0700265   |
| ATXN7L1    | ataxin 7 like 1 [Source:HGNC Symbol;Acc:HGNC:22210]                                                              | -1.0865167  |
| AURKB      | aurora kinase B [Source:HGNC Symbol;Acc:HGNC:11390]                                                              | -1.1043131  |
| AVEN       | apoptosis and caspase activation inhibitor [Source:HGNC Symbol;Acc:HGNC:13509]                                   | -1.1246307  |
| AZGP1P1    | alpha-2-glycoprotein 1, zinc-binding pseudogene 1 [Source:HGNC Symbol;Acc:HGNC:911]                              | 1.0757635   |
| AZ12       | 5-azacytidine induced 2 [Source:HGNC Symbol;Acc:HGNC:24002]                                                      | 1.1558623   |
| B4GALNT3   | beta-1,4-N-acetyl-galactosaminyltransferase 3 [Source:HGNC Symbol;Acc:HGNC:24137]                                | 1.0571241   |

|         |                                                                                                        |             |
|---------|--------------------------------------------------------------------------------------------------------|-------------|
| B4GALT1 | beta-1,4-galactosyltransferase 1 [Source:HGNC Symbol;Acc:HGNC:924]                                     | -1.9519022  |
| B4GALT2 | beta-1,4-galactosyltransferase 2 [Source:HGNC Symbol;Acc:HGNC:925]                                     | 1.2084926   |
| B4GALT4 | beta-1,4-galactosyltransferase 4 [Source:HGNC Symbol;Acc:HGNC:927]                                     | -1.1900249  |
| B4GALT5 | beta-1,4-galactosyltransferase 5 [Source:HGNC Symbol;Acc:HGNC:928]                                     | -1.7326291  |
| BAALC   | brain and acute leukemia, cytoplasmic [Source:HGNC Symbol;Acc:HGNC:14333]                              | -1.1608124  |
| BABAM1  | BRIS1 and BRCA1 A complex member 1 [Source:HGNC Symbol;Acc:HGNC:25008]                                 | 1.1690655   |
| BACE1   | beta-secretase 1 [Source:HGNC Symbol;Acc:HGNC:933]                                                     | -1.2863574  |
| BAD     | BCL2 associated agonist of cell death [Source:HGNC Symbol;Acc:HGNC:936]                                | -1.1132538  |
| BAG2    | BCL2 associated athanogene 2 [Source:HGNC Symbol;Acc:HGNC:938]                                         | 1.2176627   |
| BAG4    | BCL2 associated athanogene 4 [Source:HGNC Symbol;Acc:HGNC:940]                                         | 1.1364249   |
| BAGE    | B melanoma antigen                                                                                     | -1.1304287  |
| BAIAP2  | BAI1 associated protein 2 [Source:HGNC Symbol;Acc:HGNC:947]                                            | 1.12370395  |
| BAMBI   | BMP and activin membrane bound inhibitor [Source:HGNC Symbol;Acc:HGNC:30251]                           | -2.4658017  |
| BANF1   | barrier to autointegration factor 1 [Source:HGNC Symbol;Acc:HGNC:17397]                                | 1.0583279   |
| BANP    | BTG3 associated nuclear protein [Source:HGNC Symbol;Acc:HGNC:13450]                                    | -1.0843782  |
| BARD1   | BRCA1 associated RING domain 1 [Source:HGNC Symbol;Acc:HGNC:952]                                       | 1.3892603   |
| BATF    | basic leucine zipper ATF-like transcription factor [Source:HGNC Symbol;Acc:HGNC:958]                   | -1.0835506  |
| BATF3   | basic leucine zipper ATF-like transcription factor 3 [Source:HGNC Symbol;Acc:HGNC:28915]               | -1.5118812  |
| BAX     | BCL2 associated X, apoptosis regulator [Source:HGNC Symbol;Acc:HGNC:959]                               | 1.4119049   |
| BAZ1B   | bromodomain adjacent to zinc finger domain 1B [Source:HGNC Symbol;Acc:HGNC:961]                        | 1.4825696   |
| BBC3    | BCL2 binding component 3 [Source:HGNC Symbol;Acc:HGNC:17868]                                           | -1.987462   |
| BBS1    | Bardet-Biedl syndrome 1 [Source:HGNC Symbol;Acc:HGNC:966]                                              | -1.1490573  |
| BBS4    | Bardet-Biedl syndrome 4 [Source:HGNC Symbol;Acc:HGNC:969]                                              | -1.0916607  |
| BBS5    | Bardet-Biedl syndrome 5 [Source:HGNC Symbol;Acc:HGNC:970]                                              | 1.137248    |
| BCAN    | brevican [Source:HGNC Symbol;Acc:HGNC:23059]                                                           | -1.0868853  |
| BCAT1   | branched chain amino acid transaminase 1 [Source:HGNC Symbol;Acc:HGNC:976]                             | 2.0375526   |
| BCDIN3D | BCDIN3 domain containing RNA methyltransferase [Source:HGNC Symbol;Acc:HGNC:27050]                     | 1.328748    |
| BCL11A  | B-cell CLL/lymphoma 11A [Source:HGNC Symbol;Acc:HGNC:13221]                                            | 1.09127815  |
| BCL2    | BCL2, apoptosis regulator [Source:HGNC Symbol;Acc:HGNC:990]                                            | 1.1681875   |
| BCL2A1  | BCL2 related protein A1 [Source:HGNC Symbol;Acc:HGNC:991]                                              | -2.484996   |
| BCL2L1  | BCL2 like 1 [Source:HGNC Symbol;Acc:HGNC:992]                                                          | 1.4653032   |
| BCL2L10 | BCL2 like 10 [Source:HGNC Symbol;Acc:HGNC:993]                                                         | 1.1074464   |
| BCL2L11 | BCL2 like 11 [Source:HGNC Symbol;Acc:HGNC:994]                                                         | -1.705509   |
| BCL2L15 | BCL2 like 15 [Source:HGNC Symbol;Acc:HGNC:33624]                                                       | -1.1152124  |
| BCL2L2  | BCL2 like 2 [Source:HGNC Symbol;Acc:HGNC:995]                                                          | -1.2008884  |
| BCL3    | B-cell CLL/lymphoma 3 [Source:HGNC Symbol;Acc:HGNC:998]                                                | -3.5352957  |
| BCL6    | B-cell CLL/lymphoma 6 [Source:HGNC Symbol;Acc:HGNC:1001]                                               | -1.1438493  |
| BCL6B   | B-cell CLL/lymphoma 6B [Source:HGNC Symbol;Acc:HGNC:1002]                                              | -2.321052   |
| BCL9L   | B-cell CLL/lymphoma 9-like [Source:HGNC Symbol;Acc:HGNC:23688]                                         | -1.22514    |
| BCO2    | beta-carotene oxygenase 2 [Source:HGNC Symbol;Acc:HGNC:18503]                                          | 1.1213925   |
| BCOR    | BCL6 corepressor [Source:HGNC Symbol;Acc:HGNC:20893]                                                   | -1.28321335 |
| BCR     | BCR, RhoGEF and GTPase activating protein [Source:HGNC Symbol;Acc:HGNC:1014]                           | -1.1858041  |
| BCRP2   | breakpoint cluster region pseudogene 2 [Source:HGNC Symbol;Acc:HGNC:1015]                              | -1.283097   |
| BDH1    | 3-hydroxybutyrate dehydrogenase, type 1 [Source:HGNC Symbol;Acc:HGNC:1027]                             | 1.4033644   |
| BDKRB1  | bradykinin receptor B1 [Source:HGNC Symbol;Acc:HGNC:1029]                                              | -1.1134189  |
| BDKRB2  | bradykinin receptor B2 [Source:HGNC Symbol;Acc:HGNC:1030]                                              | -1.9707477  |
| BDNF    | brain derived neurotrophic factor [Source:HGNC Symbol;Acc:HGNC:1033]                                   | 1.41973505  |
| BEGAIN  | brain enriched guanylate kinase associated [Source:HGNC Symbol;Acc:HGNC:24163]                         | -1.4803464  |
| BEND7   | BEN domain containing 7 [Source:HGNC Symbol;Acc:HGNC:23514]                                            | -1.2252234  |
| BEST1   | bestrophin 1 [Source:HGNC Symbol;Acc:HGNC:12703]                                                       | 1.0681973   |
| BET3L   | trafficking protein particle complex 3 like                                                            | -1.0716788  |
| BEX2    | brain expressed X-linked 2 [Source:HGNC Symbol;Acc:HGNC:30933]                                         | -1.2434828  |
| BEX4    | brain expressed X-linked 4 [Source:HGNC Symbol;Acc:HGNC:25475]                                         | -1.0661619  |
| BFSP1   | beaded filament structural protein 1 [Source:HGNC Symbol;Acc:HGNC:1040]                                | 1.1312419   |
| BGN     | biglycan [Source:HGNC Symbol;Acc:HGNC:1044]                                                            | 1.8416222   |
| BHLHA15 | basic helix-loop-helix family member a15 [Source:HGNC Symbol;Acc:HGNC:22265]                           | -1.0989157  |
| BHLHE22 | basic helix-loop-helix family member e22 [Source:HGNC Symbol;Acc:HGNC:11963]                           | 1.0699666   |
| BHLHE40 | basic helix-loop-helix family member e40 [Source:HGNC Symbol;Acc:HGNC:1046]                            | -1.6723416  |
| BHLHE41 | basic helix-loop-helix family member e41 [Source:HGNC Symbol;Acc:HGNC:16617]                           | -1.7422471  |
| BICC1   | BicC family RNA binding protein 1 [Source:HGNC Symbol;Acc:HGNC:19351]                                  | -1.1615374  |
| BID     | BH3 interacting domain death agonist [Source:HGNC Symbol;Acc:HGNC:1050]                                | -1.1472667  |
| BIK     | BCL2 interacting killer [Source:HGNC Symbol;Acc:HGNC:1051]                                             | -1.8745261  |
| BIRC3   | baculoviral IAP repeat containing 3 [Source:HGNC Symbol;Acc:HGNC:591]                                  | -8.632974   |
| BIVM    | basic, immunoglobulin-like variable motif containing [Source:HGNC Symbol;Acc:HGNC:16034]               | 1.4044118   |
| BLM     | Bloom syndrome RecQ like helicase [Source:HGNC Symbol;Acc:HGNC:1058]                                   | 1.358415    |
| BLOC152 | biogenesis of lysosomal organelles complex 1 subunit 2 [Source:HGNC Symbol;Acc:HGNC:20984]             | 1.2011064   |
| BMF     | Bcl2 modifying factor [Source:HGNC Symbol;Acc:HGNC:24132]                                              | -1.6515329  |
| BM11    | BM11 proto-oncogene, polycomb ring finger [Source:HGNC Symbol;Acc:HGNC:1066]                           | 1.1267371   |
| BMP2    | bone morphogenetic protein 2 [Source:HGNC Symbol;Acc:HGNC:1069]                                        | -2.7585454  |
| BMP2K   | BMP2 inducible kinase [Source:HGNC Symbol;Acc:HGNC:18041]                                              | 1.1979887   |
| BMP3    | bone morphogenetic protein 3 [Source:HGNC Symbol;Acc:HGNC:1070]                                        | 1.0753007   |
| BMP4    | bone morphogenetic protein 4 [Source:HGNC Symbol;Acc:HGNC:1071]                                        | 1.3945035   |
| BNIP1   | BCL2 interacting protein 1 [Source:HGNC Symbol;Acc:HGNC:1082]                                          | -1.332247   |
| BNIP3L  | BCL2 interacting protein 3 like [Source:HGNC Symbol;Acc:HGNC:1085]                                     | 1.6140515   |
| BOD1    | biorientation of chromosomes in cell division 1 [Source:HGNC Symbol;Acc:HGNC:25114]                    | -1.1513828  |
| BOK     | BOK, BCL2 family apoptosis regulator [Source:HGNC Symbol;Acc:HGNC:1087]                                | -1.3769368  |
| BPGM    | bisphosphoglycerate mutase [Source:HGNC Symbol;Acc:HGNC:1093]                                          | -1.39353    |
| BPNT1   | 3'(2'), 5'-bisphosphate nucleotidase 1 [Source:HGNC Symbol;Acc:HGNC:1096]                              | -1.1938287  |
| BRCA2   | BRCA2, DNA repair associated [Source:HGNC Symbol;Acc:HGNC:1101]                                        | 1.0850444   |
| BRCC3   | BRCA1/BRCA2-containing complex subunit 3 [Source:HGNC Symbol;Acc:HGNC:24185]                           | 1.5193005   |
| BRD3    | bromodomain containing 3 [Source:HGNC Symbol;Acc:HGNC:1104]                                            | -1.0745567  |
| BRD4    | bromodomain containing 4 [Source:HGNC Symbol;Acc:HGNC:13575]                                           | -1.2179859  |
| BRDT    | bromodomain testis associated [Source:HGNC Symbol;Acc:HGNC:1105]                                       | 1.195707    |
| BRF1    | 1, RNA polymerase III transcription initiation factor 90 kDa subunit [Source:HGNC Symbol;Acc:HGNC:111] | 1.3878995   |
| BRP44L  | mitochondrial pyruvate carrier 1                                                                       | -1.3508238  |
| BRPF1   | bromodomain and PHD finger containing 1 [Source:HGNC Symbol;Acc:HGNC:14255]                            | -1.2391176  |

|          |                                                                                                   |              |
|----------|---------------------------------------------------------------------------------------------------|--------------|
| BRPF3    | bromodomain and PHD finger containing 3 [Source:HGNC Symbol;Acc:HGNC:14256]                       | -1.1694245   |
| BSDC1    | BSD domain containing 1 [Source:HGNC Symbol;Acc:HGNC:25501]                                       | -1.251499833 |
| BSN      | bassoon presynaptic cytomatrix protein [Source:HGNC Symbol;Acc:HGNC:1117]                         | 1.0774626    |
| BST1     | bone marrow stromal cell antigen 1 [Source:HGNC Symbol;Acc:HGNC:1118]                             | -1.2324651   |
| BTBD1    | BTB domain containing 1 [Source:HGNC Symbol;Acc:HGNC:1120]                                        | 1.3135189    |
| BTBD17   | BTB domain containing 17 [Source:HGNC Symbol;Acc:HGNC:33758]                                      | -1.1142645   |
| BTBD2    | BTB domain containing 2 [Source:HGNC Symbol;Acc:HGNC:15504]                                       | 1.4108995    |
| BTBD3    | BTB domain containing 3 [Source:HGNC Symbol;Acc:HGNC:15854]                                       | 1.1184211    |
| BTBD7    | BTB domain containing 7 [Source:HGNC Symbol;Acc:HGNC:18269]                                       | 1.2374692    |
| BTBD9    | BTB domain containing 9 [Source:HGNC Symbol;Acc:HGNC:21228]                                       | -1.155976    |
| BTG2     | BTG anti-proliferation factor 2 [Source:HGNC Symbol;Acc:HGNC:1131]                                | -1.2182752   |
| BTK      | Bruton tyrosine kinase [Source:HGNC Symbol;Acc:HGNC:1133]                                         | 1.1353592    |
| BTN2A1   | butyrophilin subfamily 2 member A1 [Source:HGNC Symbol;Acc:HGNC:1136]                             | -1.39907195  |
| BTN2A2   | butyrophilin subfamily 2 member A2 [Source:HGNC Symbol;Acc:HGNC:1137]                             | -2.1564157   |
| BTN2A3   | butyrophilin subfamily 2 member A3, pseudogene                                                    | -1.4954653   |
| BTN3A1   | butyrophilin subfamily 3 member A1 [Source:HGNC Symbol;Acc:HGNC:1138]                             | -1.3293505   |
| BTN3A2   | butyrophilin subfamily 3 member A2 [Source:HGNC Symbol;Acc:HGNC:1139]                             | -1.23984015  |
| BTRC     | beta-transducin repeat containing E3 ubiquitin protein ligase [Source:HGNC Symbol;Acc:HGNC:1144]  | 1.1071655    |
| BUB1     | BUB1 mitotic checkpoint serine/threonine kinase [Source:HGNC Symbol;Acc:HGNC:1148]                | 1.3283908    |
| BUB1B    | BUB1 mitotic checkpoint serine/threonine kinase B [Source:HGNC Symbol;Acc:HGNC:1149]              | 1.3888223    |
| BUD31    | BUD31 homolog [Source:HGNC Symbol;Acc:HGNC:29629]                                                 | -1.1293468   |
| BZRAP1   | TSPO associated protein 1                                                                         | 1.1130446    |
| BZW1     | basic leucine zipper and W2 domains 1 [Source:HGNC Symbol;Acc:HGNC:18380]                         | 1.5280015    |
| CA13     | carbonic anhydrase 13 [Source:HGNC Symbol;Acc:HGNC:14914]                                         | -1.5966207   |
| CA5BP1   | carbonic anhydrase 5B pseudogene 1 [Source:HGNC Symbol;Acc:HGNC:29544]                            | 1.0731641    |
| CA7      | carbonic anhydrase 7 [Source:HGNC Symbol;Acc:HGNC:1381]                                           | -1.0907911   |
| CA8      | carbonic anhydrase 8 [Source:HGNC Symbol;Acc:HGNC:1382]                                           | -1.2134297   |
| CAB39    | calcium binding protein 39 [Source:HGNC Symbol;Acc:HGNC:20292]                                    | -1.3557761   |
| CABLES1  | Cdk5 and Abl enzyme substrate 1 [Source:HGNC Symbol;Acc:HGNC:25097]                               | 1.8719213    |
| CABS1    | calcium binding protein, spermatid associated 1 [Source:HGNC Symbol;Acc:HGNC:30710]               | 1.1244646    |
| CABYR    | calcium binding tyrosine phosphorylation regulated [Source:HGNC Symbol;Acc:HGNC:15569]            | -1.551064    |
| CACNA2D3 | calcium voltage-gated channel auxiliary subunit alpha2delta 3 [Source:HGNC Symbol;Acc:HGNC:15460] | 1.1084201    |
| CACNG3   | calcium voltage-gated channel auxiliary subunit gamma 3 [Source:HGNC Symbol;Acc:HGNC:1407]        | -1.130643    |
| CACYBP   | calcyclin binding protein [Source:HGNC Symbol;Acc:HGNC:30423]                                     | 1.1253649    |
| CADPS    | calcium dependent secretion activator [Source:HGNC Symbol;Acc:HGNC:1426]                          | -1.208708    |
| CADPS2   | calcium dependent secretion activator 2 [Source:HGNC Symbol;Acc:HGNC:16018]                       | -1.1154019   |
| CALB2    | calbindin 2 [Source:HGNC Symbol;Acc:HGNC:1435]                                                    | -1.222056    |
| CALCA    | calcitonin related polypeptide alpha [Source:HGNC Symbol;Acc:HGNC:1437]                           | -1.0827203   |
| CALCR    | calcitonin receptor like receptor [Source:HGNC Symbol;Acc:HGNC:16709]                             | 1.731325     |
| CALHM2   | calcium homeostasis modulator 2 [Source:HGNC Symbol;Acc:HGNC:23493]                               | 1.814719     |
| CALM1    | calmodulin 1 [Source:HGNC Symbol;Acc:HGNC:1442]                                                   | -1.1997496   |
| CALM2    | calmodulin 2 [Source:HGNC Symbol;Acc:HGNC:1445]                                                   | 1.3150295    |
| CALM3    | calmodulin 3 [Source:HGNC Symbol;Acc:HGNC:1449]                                                   | 1.155265     |
| CAMK2D   | calcium/calmodulin dependent protein kinase II delta [Source:HGNC Symbol;Acc:HGNC:1462]           | 1.10263      |
| CAMK2G   | calcium/calmodulin dependent protein kinase II gamma [Source:HGNC Symbol;Acc:HGNC:1463]           | 1.1799176    |
| CAMKK2   | calcium/calmodulin dependent protein kinase kinase 2 [Source:HGNC Symbol;Acc:HGNC:1470]           | -1.4172559   |
| CAMTA2   | calmodulin binding transcription activator 2 [Source:HGNC Symbol;Acc:HGNC:18807]                  | 1.1752386    |
| CAND1    | cullin associated and neddylation dissociated 1 [Source:HGNC Symbol;Acc:HGNC:30688]               | -1.2486426   |
| CAPN12   | calpain 12 [Source:HGNC Symbol;Acc:HGNC:13249]                                                    | 1.0674342    |
| CAPN14   | calpain 14 [Source:HGNC Symbol;Acc:HGNC:16664]                                                    | 1.1103263    |
| CAPS     | calyphosine [Source:HGNC Symbol;Acc:HGNC:1487]                                                    | 1.1143286    |
| CAPZA2   | capping actin protein of muscle Z-line alpha subunit 2 [Source:HGNC Symbol;Acc:HGNC:1490]         | 1.5588872    |
| CAPZB    | capping actin protein of muscle Z-line beta subunit [Source:HGNC Symbol;Acc:HGNC:1491]            | 1.1272553    |
| CARD10   | caspase recruitment domain family member 10 [Source:HGNC Symbol;Acc:HGNC:16422]                   | 1.6181695    |
| CARD11   | caspase recruitment domain family member 11 [Source:HGNC Symbol;Acc:HGNC:16393]                   | -1.0986353   |
| CARD6    | caspase recruitment domain family member 6 [Source:HGNC Symbol;Acc:HGNC:16394]                    | 1.2187955    |
| CARD8    | caspase recruitment domain family member 8 [Source:HGNC Symbol;Acc:HGNC:17057]                    | 1.9096254    |
| CARD9    | caspase recruitment domain family member 9 [Source:HGNC Symbol;Acc:HGNC:16391]                    | -1.2662306   |
| CARM1    | coactivator associated arginine methyltransferase 1 [Source:HGNC Symbol;Acc:HGNC:23393]           | -1.0642453   |
| CARS     | cysteinyI-tRNA synthetase [Source:HGNC Symbol;Acc:HGNC:1493]                                      | -1.2984945   |
| CARS2    | cysteinyI-tRNA synthetase 2, mitochondrial (putative) [Source:HGNC Symbol;Acc:HGNC:25695]         | 1.0972837    |
| CASC3    | cancer susceptibility candidate 3 [Source:HGNC Symbol;Acc:HGNC:17040]                             | -1.1128179   |
| CASC5    | kinetochore scaffold 1                                                                            | 1.0782192    |
| CASK     | calcium/calmodulin dependent serine protein kinase [Source:HGNC Symbol;Acc:HGNC:1497]             | 1.0503185    |
| CASP10   | caspase 10 [Source:HGNC Symbol;Acc:HGNC:1500]                                                     | -1.1915936   |
| CASP2    | caspase 2 [Source:HGNC Symbol;Acc:HGNC:1503]                                                      | 1.2206196    |
| CASS4    | Cas scaffolding protein family member 4 [Source:HGNC Symbol;Acc:HGNC:15878]                       | -1.2246492   |
| CAT      | catalase [Source:HGNC Symbol;Acc:HGNC:1516]                                                       | -1.1889257   |
| CBLL1    | Cbl proto-oncogene like 1 [Source:HGNC Symbol;Acc:HGNC:21225]                                     | -1.321054    |
| CBLN2    | cerebellin 2 precursor [Source:HGNC Symbol;Acc:HGNC:1544]                                         | -1.5886966   |
| CBLN3    | cerebellin 3 precursor [Source:HGNC Symbol;Acc:HGNC:20146]                                        | -2.8616996   |
| CBR3     | carbonyl reductase 3 [Source:HGNC Symbol;Acc:HGNC:1549]                                           | -2.6813447   |
| CBWD5    | COBW domain containing 5 [Source:HGNC Symbol;Acc:HGNC:24584]                                      | 1.21022255   |
| CBX1     | chromobox 1 [Source:HGNC Symbol;Acc:HGNC:1551]                                                    | 1.2934592    |
| CBX2     | chromobox 2 [Source:HGNC Symbol;Acc:HGNC:1552]                                                    | -1.2486842   |
| CBX3     | chromobox 3 [Source:HGNC Symbol;Acc:HGNC:1553]                                                    | 1.4430742    |
| CBX8     | chromobox 8 [Source:HGNC Symbol;Acc:HGNC:15962]                                                   | 1.272581     |
| CC2D1A   | coiled-coil and C2 domain containing 1A [Source:HGNC Symbol;Acc:HGNC:30237]                       | 1.1964161    |
| CC2D1B   | coiled-coil and C2 domain containing 1B [Source:HGNC Symbol;Acc:HGNC:29386]                       | -1.1948502   |
| CC2D2A   | coiled-coil and C2 domain containing 2A [Source:HGNC Symbol;Acc:HGNC:29253]                       | 1.1013218    |
| CC2D2B   | coiled-coil and C2 domain containing 2B [Source:HGNC Symbol;Acc:HGNC:31666]                       | 1.0635815    |
| CCBE1    | collagen and calcium binding EGF domains 1 [Source:HGNC Symbol;Acc:HGNC:29426]                    | 1.0840408    |
| CCBP2    | atypical chemokine receptor 4                                                                     | -1.0664968   |
| CCDC102A | coiled-coil domain containing 102A [Source:HGNC Symbol;Acc:HGNC:28097]                            | -2.074409    |
| CCDC102B | coiled-coil domain containing 102B [Source:HGNC Symbol;Acc:HGNC:26295]                            | 1.06603725   |
| CCDC114  | coiled-coil domain containing 114 [Source:HGNC Symbol;Acc:HGNC:26560]                             | 1.1013131    |

|         |                                                                                     |             |
|---------|-------------------------------------------------------------------------------------|-------------|
| CCDC117 | coiled-coil domain containing 117 [Source:HGNC Symbol;Acc:HGNC:26599]               | 1.268229    |
| CCDC122 | coiled-coil domain containing 122 [Source:HGNC Symbol;Acc:HGNC:26478]               | 1.0873597   |
| CCDC125 | coiled-coil domain containing 125 [Source:HGNC Symbol;Acc:HGNC:28924]               | 1.262252    |
| CCDC127 | coiled-coil domain containing 127 [Source:HGNC Symbol;Acc:HGNC:30520]               | -1.2325678  |
| CCDC130 | coiled-coil domain containing 130 [Source:HGNC Symbol;Acc:HGNC:28118]               | -1.5990587  |
| CCDC135 | dynein regulatory complex subunit 7                                                 | -1.0597217  |
| CCDC136 | coiled-coil domain containing 136 [Source:HGNC Symbol;Acc:HGNC:22225]               | 1.0772107   |
| CCDC147 | cilia and flagella associated protein 58                                            | 1.1415145   |
| CCDC158 | coiled-coil domain containing 158 [Source:HGNC Symbol;Acc:HGNC:26374]               | -1.2003424  |
| CCDC165 | microtubule crosslinking factor 1                                                   | 1.4233621   |
| CCDC17  | coiled-coil domain containing 17 [Source:HGNC Symbol;Acc:HGNC:26574]                | -1.1202221  |
| CCDC18  | coiled-coil domain containing 18 [Source:HGNC Symbol;Acc:HGNC:30370]                | 1.3375928   |
| CCDC34  | coiled-coil domain containing 34 [Source:HGNC Symbol;Acc:HGNC:25079]                | 1.1961079   |
| CCDC43  | coiled-coil domain containing 43 [Source:HGNC Symbol;Acc:HGNC:26472]                | 1.2030979   |
| CCDC48  | EF-hand and coiled-coil domain containing 1                                         | 1.4252007   |
| CCDC57  | coiled-coil domain containing 57 [Source:HGNC Symbol;Acc:HGNC:27564]                | -1.1053814  |
| CCDC6   | coiled-coil domain containing 6 [Source:HGNC Symbol;Acc:HGNC:18782]                 | 1.3472356   |
| CCDC66  | coiled-coil domain containing 66 [Source:HGNC Symbol;Acc:HGNC:27709]                | 1.2598557   |
| CCDC68  | coiled-coil domain containing 68 [Source:HGNC Symbol;Acc:HGNC:24350]                | 1.0944777   |
| CCDC69  | coiled-coil domain containing 69 [Source:HGNC Symbol;Acc:HGNC:24487]                | -1.5884665  |
| CCDC7   | coiled-coil domain containing 7 [Source:HGNC Symbol;Acc:HGNC:26533]                 | -1.2096258  |
| CCDC72  | translation machinery associated 7 homolog                                          | -1.1235614  |
| CCDC77  | coiled-coil domain containing 77 [Source:HGNC Symbol;Acc:HGNC:28203]                | 1.3094445   |
| CCDC87  | coiled-coil domain containing 87 [Source:HGNC Symbol;Acc:HGNC:25579]                | -1.1664268  |
| CCDC88B | coiled-coil domain containing 88B [Source:HGNC Symbol;Acc:HGNC:26757]               | 1.2318027   |
| CCDC9   | coiled-coil domain containing 9 [Source:HGNC Symbol;Acc:HGNC:24560]                 | -1.4933194  |
| CCDC90A | mitochondrial calcium uniporter regulator 1                                         | -1.1656632  |
| CCDC92  | coiled-coil domain containing 92 [Source:HGNC Symbol;Acc:HGNC:29563]                | -1.1962309  |
| CCDC94  | coiled-coil domain containing 94 [Source:HGNC Symbol;Acc:HGNC:25518]                | -1.2415799  |
| CCIN    | calicin [Source:HGNC Symbol;Acc:HGNC:1568]                                          | -1.7423061  |
| CCL1    | C-C motif chemokine ligand 1 [Source:HGNC Symbol;Acc:HGNC:10609]                    | -1.1278946  |
| CCL11   | C-C motif chemokine ligand 11 [Source:HGNC Symbol;Acc:HGNC:10610]                   | -1.2430913  |
| CCL16   | C-C motif chemokine ligand 16 [Source:HGNC Symbol;Acc:HGNC:10614]                   | 1.1499176   |
| CCL17   | C-C motif chemokine ligand 17 [Source:HGNC Symbol;Acc:HGNC:10615]                   | -1.4459815  |
| CCL20   | C-C motif chemokine ligand 20 [Source:HGNC Symbol;Acc:HGNC:10619]                   | -16.189316  |
| CCL27   | C-C motif chemokine ligand 27 [Source:HGNC Symbol;Acc:HGNC:10626]                   | 1.0958531   |
| CCL3L3  | C-C motif chemokine ligand 3 like 3 [Source:HGNC Symbol;Acc:HGNC:30554]             | -1.1380721  |
| CCL4    | C-C motif chemokine ligand 4 [Source:HGNC Symbol;Acc:HGNC:10630]                    | -1.1003438  |
| CCL5    | C-C motif chemokine ligand 5 [Source:HGNC Symbol;Acc:HGNC:10632]                    | -1.4648074  |
| CCL7    | C-C motif chemokine ligand 7 [Source:HGNC Symbol;Acc:HGNC:10634]                    | -1.6453692  |
| CCND3   | cyclin D3 [Source:HGNC Symbol;Acc:HGNC:1585]                                        | 1.4880316   |
| CCNDBP1 | cyclin D1 binding protein 1 [Source:HGNC Symbol;Acc:HGNC:1587]                      | 1.051129    |
| CCNE1   | cyclin E1 [Source:HGNC Symbol;Acc:HGNC:1589]                                        | 1.1546259   |
| CCNE2   | cyclin E2 [Source:HGNC Symbol;Acc:HGNC:1590]                                        | 1.38179315  |
| CCNG1   | cyclin G1 [Source:HGNC Symbol;Acc:HGNC:1592]                                        | 1.1649122   |
| CCNH    | cyclin H [Source:HGNC Symbol;Acc:HGNC:1594]                                         | 1.3526845   |
| CCNJL   | cyclin J like [Source:HGNC Symbol;Acc:HGNC:25876]                                   | -1.2287031  |
| CCNK    | cyclin K [Source:HGNC Symbol;Acc:HGNC:1596]                                         | -1.1897988  |
| CCNO    | cyclin O [Source:HGNC Symbol;Acc:HGNC:18576]                                        | -1.3829342  |
| CCR10   | C-C motif chemokine receptor 10 [Source:HGNC Symbol;Acc:HGNC:4474]                  | -1.685271   |
| CCRL2   | C-C motif chemokine receptor like 2 [Source:HGNC Symbol;Acc:HGNC:1612]              | -1.3415862  |
| CCRN4L  | nocturnin                                                                           | -1.8238574  |
| CCT3    | chaperonin containing TCP1 subunit 3 [Source:HGNC Symbol;Acc:HGNC:1616]             | -1.233663   |
| CCT8L2  | chaperonin containing TCP1 subunit 8 like 2 [Source:HGNC Symbol;Acc:HGNC:15553]     | 1.1354038   |
| CD14    | CD14 molecule [Source:HGNC Symbol;Acc:HGNC:1628]                                    | -1.2066199  |
| CD164   | CD164 molecule [Source:HGNC Symbol;Acc:HGNC:1632]                                   | -1.0877779  |
| CD19    | CD19 molecule [Source:HGNC Symbol;Acc:HGNC:1633]                                    | -1.0952975  |
| CD2     | CD2 molecule [Source:HGNC Symbol;Acc:HGNC:1639]                                     | -1.1567912  |
| CD200R1 | CD200 receptor 1 [Source:HGNC Symbol;Acc:HGNC:24235]                                | 1.116739    |
| CD247   | CD247 molecule [Source:HGNC Symbol;Acc:HGNC:1677]                                   | 1.2551904   |
| CD274   | CD274 molecule [Source:HGNC Symbol;Acc:HGNC:17635]                                  | -1.2411003  |
| CD300E  | CD300e molecule [Source:HGNC Symbol;Acc:HGNC:28874]                                 | -1.1087426  |
| CD300LD | CD300 molecule like family member d [Source:HGNC Symbol;Acc:HGNC:16848]             | 1.0899926   |
| CD34    | CD34 molecule [Source:HGNC Symbol;Acc:HGNC:1662]                                    | -1.3446221  |
| CD3EAP  | CD3e molecule associated protein [Source:HGNC Symbol;Acc:HGNC:24219]                | 1.2518119   |
| CD40    | CD40 molecule [Source:HGNC Symbol;Acc:HGNC:11919]                                   | -1.50629995 |
| CD46    | CD46 molecule [Source:HGNC Symbol;Acc:HGNC:6953]                                    | 1.1097405   |
| CD47    | CD47 molecule [Source:HGNC Symbol;Acc:HGNC:1682]                                    | -1.4642583  |
| CD52    | CD52 molecule [Source:HGNC Symbol;Acc:HGNC:1804]                                    | 1.0710961   |
| CD58    | CD58 molecule [Source:HGNC Symbol;Acc:HGNC:1688]                                    | -1.4621334  |
| CD69    | CD69 molecule [Source:HGNC Symbol;Acc:HGNC:1694]                                    | -3.9310902  |
| CD70    | CD70 molecule [Source:HGNC Symbol;Acc:HGNC:11937]                                   | -2.034662   |
| CD72    | CD72 molecule [Source:HGNC Symbol;Acc:HGNC:1696]                                    | 1.0671585   |
| CD81    | CD81 molecule [Source:HGNC Symbol;Acc:HGNC:1701]                                    | -1.11832445 |
| CD82    | CD82 molecule [Source:HGNC Symbol;Acc:HGNC:6210]                                    | -1.274367   |
| CD83    | CD83 molecule [Source:HGNC Symbol;Acc:HGNC:1703]                                    | -8.712782   |
| CD8A    | CD8a molecule [Source:HGNC Symbol;Acc:HGNC:1706]                                    | -1.1076034  |
| CD99    | CD99 molecule [Source:HGNC Symbol;Acc:HGNC:7082]                                    | -1.2449781  |
| CD99L2  | CD99 molecule like 2 [Source:HGNC Symbol;Acc:HGNC:18237]                            | -1.1827847  |
| CDAD1   | cytidine and dCMP deaminase domain containing 1 [Source:HGNC Symbol;Acc:HGNC:20299] | 1.101491    |
| CDC14A  | cell division cycle 14A [Source:HGNC Symbol;Acc:HGNC:1718]                          | -1.2947338  |
| CDC14C  | cell division cycle 14C, pseudogene [Source:HGNC Symbol;Acc:HGNC:22427]             | -1.0666852  |
| CDC20B  | cell division cycle 20B [Source:HGNC Symbol;Acc:HGNC:24222]                         | 1.1306446   |
| CDC27   | cell division cycle 27 [Source:HGNC Symbol;Acc:HGNC:1728]                           | 1.3274866   |
| CDC37   | cell division cycle 37 [Source:HGNC Symbol;Acc:HGNC:1735]                           | -1.1099256  |
| CDC40   | cell division cycle 40 [Source:HGNC Symbol;Acc:HGNC:17350]                          | 1.429435    |

|          |                                                                                                            |             |
|----------|------------------------------------------------------------------------------------------------------------|-------------|
| CDC42EP2 | CDC42 effector protein 2 [Source:HGNC Symbol;Acc:HGNC:16263]                                               | -1.526188   |
| CDC42SE1 | CDC42 small effector 1 [Source:HGNC Symbol;Acc:HGNC:17719]                                                 | -1.3183223  |
| CD45     | cell division factor 45 [Source:HGNC Symbol;Acc:HGNC:1739]                                                 | 1.198193    |
| CD7      | cell division cycle 7 [Source:HGNC Symbol;Acc:HGNC:1745]                                                   | 1.404828    |
| CDC42    | cell division cycle associated 2 [Source:HGNC Symbol;Acc:HGNC:14623]                                       | 1.392837    |
| CDH11    | cadherin 11 [Source:HGNC Symbol;Acc:HGNC:1750]                                                             | -1.3912827  |
| CDH3     | cadherin 3 [Source:HGNC Symbol;Acc:HGNC:1762]                                                              | -1.0770509  |
| CDH5     | cadherin 5 [Source:HGNC Symbol;Acc:HGNC:1764]                                                              | -1.2215142  |
| CDH6     | cadherin 6 [Source:HGNC Symbol;Acc:HGNC:1765]                                                              | 1.0934659   |
| CDHR1    | cadherin related family member 1 [Source:HGNC Symbol;Acc:HGNC:14550]                                       | -1.0701951  |
| CDHR2    | cadherin related family member 2 [Source:HGNC Symbol;Acc:HGNC:18231]                                       | -1.186482   |
| CDHR4    | cadherin related family member 4 [Source:HGNC Symbol;Acc:HGNC:34527]                                       | -1.0907234  |
| CDK1     | cyclin dependent kinase 1 [Source:HGNC Symbol;Acc:HGNC:1722]                                               | 1.5477147   |
| CDK19    | cyclin dependent kinase 19 [Source:HGNC Symbol;Acc:HGNC:19338]                                             | 1.3349775   |
| CDK2     | cyclin dependent kinase 2 [Source:HGNC Symbol;Acc:HGNC:1771]                                               | 1.0927821   |
| CDK2AP2  | cyclin dependent kinase 2 associated protein 2 [Source:HGNC Symbol;Acc:HGNC:30833]                         | -1.1945862  |
| CDK5R1   | cyclin dependent kinase 5 regulatory subunit 1 [Source:HGNC Symbol;Acc:HGNC:1775]                          | 1.0657651   |
| CDKL1    | cyclin dependent kinase like 1 [Source:HGNC Symbol;Acc:HGNC:1781]                                          | -1.1402655  |
| CDKN2A   | cyclin dependent kinase inhibitor 2A [Source:HGNC Symbol;Acc:HGNC:1787]                                    | -1.1714987  |
| CDKN3    | cyclin dependent kinase inhibitor 3 [Source:HGNC Symbol;Acc:HGNC:1791]                                     | 1.2285981   |
| CDNF     | cerebral dopamine neurotrophic factor [Source:HGNC Symbol;Acc:HGNC:24913]                                  | 1.1389828   |
| CDV3     | CDV3 homolog [Source:HGNC Symbol;Acc:HGNC:26928]                                                           | -1.52176005 |
| CDY2A    | chromodomain Y-linked 2A [Source:HGNC Symbol;Acc:HGNC:1810]                                                | 1.068769    |
| CEACAM20 | carcinoembryonic antigen related cell adhesion molecule 20 [Source:HGNC Symbol;Acc:HGNC:24879]             | -1.2031957  |
| CEACAM4  | carcinoembryonic antigen related cell adhesion molecule 4 [Source:HGNC Symbol;Acc:HGNC:1816]               | -1.1137035  |
| CEBPG    | CCAAT/enhancer binding protein gamma [Source:HGNC Symbol;Acc:HGNC:1837]                                    | 1.2769895   |
| CECR2    | CECR2, histone acetyl-lysine reader [Source:HGNC Symbol;Acc:HGNC:1840]                                     | -1.2035571  |
| CECR3    | ye syndrome chromosome region, candidate 3 (non-protein coding) [Source:HGNC Symbol;Acc:HGNC:1841]         | -1.1294549  |
| CECR6    | cat eye syndrome chromosome region, candidate 6 [Source:HGNC Symbol;Acc:HGNC:1844]                         | 1.289251    |
| CELF3    | CUGBP, Elav-like family member 3 [Source:HGNC Symbol;Acc:HGNC:11967]                                       | 1.382329    |
| CELF6    | CUGBP, Elav-like family member 6 [Source:HGNC Symbol;Acc:HGNC:14059]                                       | -1.2530304  |
| CELSR1   | cadherin EGF LAG seven-pass G-type receptor 1 [Source:HGNC Symbol;Acc:HGNC:1850]                           | -1.1888963  |
| CENP1    | cementum protein 1 [Source:HGNC Symbol;Acc:HGNC:32553]                                                     | 1.1171341   |
| CENPB    | centromere protein B [Source:HGNC Symbol;Acc:HGNC:1852]                                                    | 1.4983394   |
| CENPN    | centromere protein N [Source:HGNC Symbol;Acc:HGNC:30873]                                                   | 1.1702483   |
| CENPO    | centromere protein O [Source:HGNC Symbol;Acc:HGNC:28152]                                                   | -1.1749657  |
| CENPQ    | centromere protein Q [Source:HGNC Symbol;Acc:HGNC:21347]                                                   | 1.4293792   |
| CENPT    | centromere protein T [Source:HGNC Symbol;Acc:HGNC:25787]                                                   | -1.2762923  |
| CEP44    | centrosomal protein 44 [Source:HGNC Symbol;Acc:HGNC:29356]                                                 | 1.274821    |
| CEP55    | centrosomal protein 55 [Source:HGNC Symbol;Acc:HGNC:1161]                                                  | 1.5273156   |
| CEP68    | centrosomal protein 68 [Source:HGNC Symbol;Acc:HGNC:29076]                                                 | -1.0627037  |
| CEP78    | centrosomal protein 78 [Source:HGNC Symbol;Acc:HGNC:25740]                                                 | 1.112971    |
| CERS1    | ceramide synthase 1 [Source:HGNC Symbol;Acc:HGNC:14253]                                                    | 1.3349206   |
| CERS4    | ceramide synthase 4 [Source:HGNC Symbol;Acc:HGNC:23747]                                                    | -1.2284675  |
| CERS6    | ceramide synthase 6 [Source:HGNC Symbol;Acc:HGNC:23826]                                                    | 1.5767936   |
| CETN3    | centrin 3 [Source:HGNC Symbol;Acc:HGNC:1868]                                                               | 1.4286331   |
| CF1      | cofilin 1 [Source:HGNC Symbol;Acc:HGNC:1874]                                                               | 1.6365959   |
| CFLAR    | CASP8 and FADD like apoptosis regulator [Source:HGNC Symbol;Acc:HGNC:1876]                                 | -2.2210145  |
| CGGBP1   | CGG triplet repeat binding protein 1 [Source:HGNC Symbol;Acc:HGNC:1888]                                    | 1.3796169   |
| CGN      | cingulin [Source:HGNC Symbol;Acc:HGNC:17429]                                                               | 1.173265    |
| CGRFF1   | cell growth regulator with ring finger domain 1 [Source:HGNC Symbol;Acc:HGNC:15528]                        | -1.211295   |
| CHAF1B   | chromatin assembly factor 1 subunit B [Source:HGNC Symbol;Acc:HGNC:1911]                                   | 1.1342682   |
| CHCHD2   | coiled-coil-helix-coiled-coil-helix domain containing 2 [Source:HGNC Symbol;Acc:HGNC:21645]                | -1.2115042  |
| CHCHD7   | coiled-coil-helix-coiled-coil-helix domain containing 7 [Source:HGNC Symbol;Acc:HGNC:28314]                | 1.3429021   |
| CHD3     | chromodomain helicase DNA binding protein 3 [Source:HGNC Symbol;Acc:HGNC:1918]                             | -1.2134196  |
| CHD4     | chromodomain helicase DNA binding protein 4 [Source:HGNC Symbol;Acc:HGNC:1919]                             | -1.492511   |
| CHD5     | chromodomain helicase DNA binding protein 5 [Source:HGNC Symbol;Acc:HGNC:16816]                            | -1.1523012  |
| CHD7     | chromodomain helicase DNA binding protein 7 [Source:HGNC Symbol;Acc:HGNC:20626]                            | -1.3585821  |
| CHGB     | chromogranin B [Source:HGNC Symbol;Acc:HGNC:1930]                                                          | 1.078956    |
| CH13L2   | chitinase 3 like 2 [Source:HGNC Symbol;Acc:HGNC:1933]                                                      | 1.0916927   |
| CHIC2    | cysteine rich hydrophobic domain 2 [Source:HGNC Symbol;Acc:HGNC:1935]                                      | -1.5332059  |
| CHMP2B   | charged multivesicular body protein 2B [Source:HGNC Symbol;Acc:HGNC:24537]                                 | 1.2864021   |
| CHMP5    | charged multivesicular body protein 5 [Source:HGNC Symbol;Acc:HGNC:26942]                                  | 1.2925906   |
| CHN1     | chimerin 1 [Source:HGNC Symbol;Acc:HGNC:1943]                                                              | -1.1034654  |
| CHPF     | chondroitin polymerizing factor [Source:HGNC Symbol;Acc:HGNC:24291]                                        | -1.0709256  |
| CHPF2    | chondroitin polymerizing factor 2 [Source:HGNC Symbol;Acc:HGNC:29270]                                      | 1.1258259   |
| CHRD12   | chordin like 2 [Source:HGNC Symbol;Acc:HGNC:24168]                                                         | 1.1278981   |
| CHRM5    | cholinergic receptor muscarinic 5 [Source:HGNC Symbol;Acc:HGNC:1954]                                       | -1.0505883  |
| CHRNA1   | cholinergic receptor nicotinic alpha 1 subunit [Source:HGNC Symbol;Acc:HGNC:1955]                          | -1.0992494  |
| CHRNA4   | cholinergic receptor nicotinic alpha 4 subunit [Source:HGNC Symbol;Acc:HGNC:1958]                          | 1.0896581   |
| CHRNB1   | cholinergic receptor nicotinic beta 1 subunit [Source:HGNC Symbol;Acc:HGNC:1961]                           | -1.3048493  |
| CHRNB4   | cholinergic receptor nicotinic beta 4 subunit [Source:HGNC Symbol;Acc:HGNC:1964]                           | 1.0629847   |
| CHST11   | carbohydrate sulfotransferase 11 [Source:HGNC Symbol;Acc:HGNC:17422]                                       | -1.1847728  |
| CHST4    | carbohydrate sulfotransferase 4 [Source:HGNC Symbol;Acc:HGNC:1972]                                         | -1.1798018  |
| CHST5    | carbohydrate sulfotransferase 5 [Source:HGNC Symbol;Acc:HGNC:1973]                                         | -1.1764448  |
| CHST9    | carbohydrate sulfotransferase 9 [Source:HGNC Symbol;Acc:HGNC:19898]                                        | -1.0786827  |
| CHTOP    | chromatin target of PRMT1 [Source:HGNC Symbol;Acc:HGNC:24511]                                              | -1.0715858  |
| CHUK     | conserved helix-loop-helix ubiquitous kinase [Source:HGNC Symbol;Acc:HGNC:1974]                            | 1.3930103   |
| CIAPIN1  | cytokine induced apoptosis inhibitor 1 [Source:HGNC Symbol;Acc:HGNC:28050]                                 | -1.15125755 |
| CIDEC    | cell death inducing DFFA like effector c [Source:HGNC Symbol;Acc:HGNC:24229]                               | -1.2266004  |
| CIDECP   | cell death-inducing DFFA-like effector c pseudogene [Source:HGNC Symbol;Acc:HGNC:24230]                    | -1.4041673  |
| CIITA    | class II major histocompatibility complex transactivator [Source:HGNC Symbol;Acc:HGNC:7067]                | -1.0939559  |
| CIRBP    | cold inducible RNA binding protein [Source:HGNC Symbol;Acc:HGNC:1982]                                      | 1.1738772   |
| CITED2   | interacting transactivator with Glu/Asp rich carboxy-terminal domain 2 [Source:HGNC Symbol;Acc:HGNC:24231] | 1.4461203   |
| CITED4   | interacting transactivator with Glu/Asp rich carboxy-terminal domain 4 [Source:HGNC Symbol;Acc:HGNC:24232] | -6.7478375  |
| CKLF     | chemokine like factor [Source:HGNC Symbol;Acc:HGNC:13253]                                                  | -1.1130064  |

|          |                                                                                                    |             |
|----------|----------------------------------------------------------------------------------------------------|-------------|
| CKS1B    | CDC28 protein kinase regulatory subunit 1B [Source:HGNC Symbol;Acc:HGNC:19083]                     | 1.0569695   |
| CLASRP   | CLK4 associating serine/arginine rich protein [Source:HGNC Symbol;Acc:HGNC:17731]                  | 1.1578135   |
| CLCA1    | chloride channel accessory 1 [Source:HGNC Symbol;Acc:HGNC:2015]                                    | 1.1619898   |
| CLCN5    | chloride voltage-gated channel 5 [Source:HGNC Symbol;Acc:HGNC:2023]                                | -1.2384921  |
| CLCNKA   | chloride voltage-gated channel Ka [Source:HGNC Symbol;Acc:HGNC:2026]                               | -1.15006    |
| CLDN1    | claudin 1 [Source:HGNC Symbol;Acc:HGNC:2032]                                                       | -1.153556   |
| CLDN10   | claudin 10 [Source:HGNC Symbol;Acc:HGNC:2033]                                                      | -1.097779   |
| CLDN14   | claudin 14 [Source:HGNC Symbol;Acc:HGNC:2035]                                                      | -2.4382842  |
| CLDN2    | claudin 2 [Source:HGNC Symbol;Acc:HGNC:2041]                                                       | -1.4316212  |
| CLDN20   | claudin 20 [Source:HGNC Symbol;Acc:HGNC:2042]                                                      | 1.0906242   |
| CLDN24   | claudin 24 [Source:HGNC Symbol;Acc:HGNC:37200]                                                     | -1.1404729  |
| CLDN3    | claudin 3 [Source:HGNC Symbol;Acc:HGNC:2045]                                                       | 1.1285096   |
| CLDN5    | claudin 5 [Source:HGNC Symbol;Acc:HGNC:2047]                                                       | -1.8893173  |
| CLDN6    | claudin 6 [Source:HGNC Symbol;Acc:HGNC:2048]                                                       | -1.1232823  |
| CLEC14A  | C-type lectin domain family 14 member A [Source:HGNC Symbol;Acc:HGNC:19832]                        | 1.2823393   |
| CLEC17A  | C-type lectin domain family 17 member A [Source:HGNC Symbol;Acc:HGNC:34520]                        | -1.1239182  |
| CLEC1A   | C-type lectin domain family 1 member A [Source:HGNC Symbol;Acc:HGNC:24355]                         | -2.30176    |
| CLEC2D   | C-type lectin domain family 2 member D [Source:HGNC Symbol;Acc:HGNC:14351]                         | -1.2593296  |
| CLEC4GP1 | C-type lectin domain family 4 member G pseudogene 1 [Source:HGNC Symbol;Acc:HGNC:33502]            | 2.1335766   |
| CLEC5A   | C-type lectin domain family 5 member A [Source:HGNC Symbol;Acc:HGNC:2054]                          | 1.1410142   |
| CLEC7A   | C-type lectin domain family 7 member A [Source:HGNC Symbol;Acc:HGNC:14558]                         | 1.11641765  |
| CLEC9A   | C-type lectin domain family 9 member A [Source:HGNC Symbol;Acc:HGNC:26705]                         | 1.1081402   |
| CLIC4    | chloride intracellular channel 4 [Source:HGNC Symbol;Acc:HGNC:13518]                               | -1.325485   |
| CLIP2    | CAP-Gly domain containing linker protein 2 [Source:HGNC Symbol;Acc:HGNC:2586]                      | -1.49145165 |
| CLIP4    | CAP-Gly domain containing linker protein family member 4 [Source:HGNC Symbol;Acc:HGNC:26108]       | -1.0971203  |
| CLK3     | CDC like kinase 3 [Source:HGNC Symbol;Acc:HGNC:2071]                                               | -1.0954059  |
| CLUU10S  | chronic lymphocytic leukemia up-regulated 1 opposite strand [Source:HGNC Symbol;Acc:HGNC:24070]    | -1.1460944  |
| CLMN     | calmin [Source:HGNC Symbol;Acc:HGNC:19972]                                                         | 1.4177538   |
| CLN8     | ceroid-lipofuscinosis, neuronal 8 [Source:HGNC Symbol;Acc:HGNC:2079]                               | -1.2263199  |
| CLNK     | cytokine dependent hematopoietic cell linker [Source:HGNC Symbol;Acc:HGNC:17438]                   | 1.0978724   |
| CLP1     | cleavage and polyadenylation factor I subunit 1 [Source:HGNC Symbol;Acc:HGNC:16999]                | -1.156904   |
| CLPP     | caseinolytic mitochondrial matrix peptidase proteolytic subunit [Source:HGNC Symbol;Acc:HGNC:2084] | 1.2030133   |
| CLPTM1   | CLPTM1, transmembrane protein [Source:HGNC Symbol;Acc:HGNC:2087]                                   | 1.3943906   |
| CLRN1    | clarin 1 [Source:HGNC Symbol;Acc:HGNC:12605]                                                       | 1.1275384   |
| CLRN2    | clarin 2 [Source:HGNC Symbol;Acc:HGNC:33939]                                                       | 1.1069058   |
| CLSTN1   | calsyntenin 1 [Source:HGNC Symbol;Acc:HGNC:17447]                                                  | -1.1261196  |
| CLSTN3   | calsyntenin 3 [Source:HGNC Symbol;Acc:HGNC:18371]                                                  | 1.1784119   |
| CLTA     | clathrin light chain A [Source:HGNC Symbol;Acc:HGNC:2090]                                          | -1.1609766  |
| CLU      | clusterin [Source:HGNC Symbol;Acc:HGNC:2095]                                                       | -1.1240908  |
| CLUAP1   | clusterin associated protein 1 [Source:HGNC Symbol;Acc:HGNC:19009]                                 | 1.3289251   |
| CMBL     | carboxymethylglutaminyl deaminase homolog [Source:HGNC Symbol;Acc:HGNC:25090]                      | 1.1177225   |
| CMTM3    | CKLF like MARVEL transmembrane domain containing 3 [Source:HGNC Symbol;Acc:HGNC:19174]             | -1.1710814  |
| CMTM7    | CKLF like MARVEL transmembrane domain containing 7 [Source:HGNC Symbol;Acc:HGNC:19178]             | 1.1628163   |
| CMTM8    | CKLF like MARVEL transmembrane domain containing 8 [Source:HGNC Symbol;Acc:HGNC:19179]             | 1.4079307   |
| CNDP2    | CNDP dipeptidase 2 (metallopeptidase M20 family) [Source:HGNC Symbol;Acc:HGNC:24437]               | -1.2163818  |
| CNGA1    | cyclic nucleotide gated channel alpha 1 [Source:HGNC Symbol;Acc:HGNC:2148]                         | 1.1465813   |
| CNIH4    | cornichon family AMPA receptor auxiliary protein 4 [Source:HGNC Symbol;Acc:HGNC:25013]             | -1.10078285 |
| CNKSR2   | connector enhancer of kinase suppressor of Ras 2 [Source:HGNC Symbol;Acc:HGNC:19701]               | 1.0963234   |
| CNKSR3   | CNKSR family member 3 [Source:HGNC Symbol;Acc:HGNC:23034]                                          | -3.14431505 |
| CNOT2    | CCR4-NOT transcription complex subunit 2 [Source:HGNC Symbol;Acc:HGNC:7878]                        | 1.2214175   |
| CNOT4    | CCR4-NOT transcription complex subunit 4 [Source:HGNC Symbol;Acc:HGNC:7880]                        | 1.0868953   |
| CNP      | 2',3'-cyclic nucleotide 3' phosphodiesterase [Source:HGNC Symbol;Acc:HGNC:2158]                    | 1.0699669   |
| CNPY2    | canopy FGF signaling regulator 2 [Source:HGNC Symbol;Acc:HGNC:13529]                               | 1.0882498   |
| CNPY4    | canopy FGF signaling regulator 4 [Source:HGNC Symbol;Acc:HGNC:28631]                               | -1.0825522  |
| CNTN3    | contactin 3 [Source:HGNC Symbol;Acc:HGNC:2173]                                                     | 1.087419    |
| CNTNAP1  | contactin associated protein 1 [Source:HGNC Symbol;Acc:HGNC:8011]                                  | -1.3719059  |
| CNTNAP2  | contactin associated protein-like 2 [Source:HGNC Symbol;Acc:HGNC:13830]                            | 1.1986312   |
| CNTNAP3  | contactin associated protein-like 3 [Source:HGNC Symbol;Acc:HGNC:13834]                            | 1.6613365   |
| CNTNAP3B | contactin associated protein-like 3B [Source:HGNC Symbol;Acc:HGNC:32035]                           | 1.1038735   |
| CNTRL    | centriolin [Source:HGNC Symbol;Acc:HGNC:1858]                                                      | 1.15269     |
| COBL     | cordons-bleu WH2 repeat protein [Source:HGNC Symbol;Acc:HGNC:22199]                                | -1.0788543  |
| COG1     | component of oligomeric golgi complex 1 [Source:HGNC Symbol;Acc:HGNC:6545]                         | -1.1609445  |
| COG4     | component of oligomeric golgi complex 4 [Source:HGNC Symbol;Acc:HGNC:18620]                        | -1.2365643  |
| COG8     | component of oligomeric golgi complex 8 [Source:HGNC Symbol;Acc:HGNC:18623]                        | 1.1469045   |
| COL11A2  | collagen type XI alpha 2 chain [Source:HGNC Symbol;Acc:HGNC:2187]                                  | -1.1690038  |
| COL19A1  | collagen type XIX alpha 1 chain [Source:HGNC Symbol;Acc:HGNC:2196]                                 | 1.0917976   |
| COL20A1  | collagen type XX alpha 1 chain [Source:HGNC Symbol;Acc:HGNC:14670]                                 | -1.1107092  |
| COL27A1  | collagen type XXVII alpha 1 chain [Source:HGNC Symbol;Acc:HGNC:22986]                              | -1.94497425 |
| COL4A1   | collagen type IV alpha 1 chain [Source:HGNC Symbol;Acc:HGNC:2202]                                  | -1.3767632  |
| COL5A1   | collagen type V alpha 1 chain [Source:HGNC Symbol;Acc:HGNC:2209]                                   | -1.14863495 |
| COL5A3   | collagen type V alpha 3 chain [Source:HGNC Symbol;Acc:HGNC:14864]                                  | 1.1443648   |
| COL6A4P2 | collagen type VI alpha 4 pseudogene 2 [Source:HGNC Symbol;Acc:HGNC:38501]                          | 1.106017    |
| COL7A1   | collagen type VII alpha 1 chain [Source:HGNC Symbol;Acc:HGNC:2214]                                 | -1.0596586  |
| COL9A2   | collagen type IX alpha 2 chain [Source:HGNC Symbol;Acc:HGNC:2218]                                  | -1.4563527  |
| COMMD8   | COMM domain containing 8 [Source:HGNC Symbol;Acc:HGNC:26036]                                       | 1.6332517   |
| COMT     | catechol-O-methyltransferase [Source:HGNC Symbol;Acc:HGNC:2228]                                    | -1.1229084  |
| COP54    | COP9 signalosome subunit 4 [Source:HGNC Symbol;Acc:HGNC:16702]                                     | 1.3179946   |
| COQ2     | coenzyme Q2, polyprenyltransferase [Source:HGNC Symbol;Acc:HGNC:25223]                             | 1.1170671   |
| CORO2B   | coronin 2B [Source:HGNC Symbol;Acc:HGNC:2256]                                                      | -1.1370021  |
| COTL1    | coactosin like F-actin binding protein 1 [Source:HGNC Symbol;Acc:HGNC:18304]                       | -1.225889   |
| COX15    | COX15, cytochrome c oxidase assembly homolog [Source:HGNC Symbol;Acc:HGNC:2263]                    | -1.0603908  |
| COX17    | COX17, cytochrome c oxidase copper chaperone [Source:HGNC Symbol;Acc:HGNC:2264]                    | -1.1280407  |
| COX19    | COX19, cytochrome c oxidase assembly factor [Source:HGNC Symbol;Acc:HGNC:28074]                    | -1.1987144  |
| COX411   | cytochrome c oxidase subunit 411 [Source:HGNC Symbol;Acc:HGNC:2265]                                | -1.2745554  |
| COX6A2   | cytochrome c oxidase subunit 6A2 [Source:HGNC Symbol;Acc:HGNC:2279]                                | -1.2210068  |
| CP       | ceruloplasmin [Source:HGNC Symbol;Acc:HGNC:2295]                                                   | 1.097947    |

|            |                                                                                              |              |
|------------|----------------------------------------------------------------------------------------------|--------------|
| CPA2       | carboxypeptidase A2 [Source:HGNC Symbol;Acc:HGNC:2297]                                       | -1.090973    |
| CPB1       | carboxypeptidase B1 [Source:HGNC Symbol;Acc:HGNC:2299]                                       | -1.1146188   |
| CPNE2      | copine 2 [Source:HGNC Symbol;Acc:HGNC:2315]                                                  | -1.0834568   |
| CPNE3      | copine 3 [Source:HGNC Symbol;Acc:HGNC:2316]                                                  | 1.2675887    |
| CPOX       | coproporphyrinogen oxidase [Source:HGNC Symbol;Acc:HGNC:2321]                                | 1.2864143    |
| CPPED1     | calcineurin like phosphoesterase domain containing 1 [Source:HGNC Symbol;Acc:HGNC:25632]     | -1.2824229   |
| CPSF2      | cleavage and polyadenylation specific factor 2 [Source:HGNC Symbol;Acc:HGNC:2325]            | 1.2245158    |
| CPSF3L     | cleavage and polyadenylation specific factor 3-like [Source:HGNC Symbol;Acc:HGNC:26052]      | -1.1432475   |
| CPSF7      | cleavage and polyadenylation specific factor 7 [Source:HGNC Symbol;Acc:HGNC:30098]           | -1.0677586   |
| CPT1B      | carnitine palmitoyltransferase 1B [Source:HGNC Symbol;Acc:HGNC:2329]                         | 1.1522236    |
| CR1        | complement component 3b/4b receptor 1 (Knops blood group) [Source:HGNC Symbol;Acc:HGNC:2334] | 1.1302441    |
| CRABP2     | cellular retinoic acid binding protein 2 [Source:HGNC Symbol;Acc:HGNC:2339]                  | -1.1324071   |
| CRB2       | crumbs 2, cell polarity complex component [Source:HGNC Symbol;Acc:HGNC:18688]                | 1.1038187    |
| CREB3      | cAMP responsive element binding protein 3 [Source:HGNC Symbol;Acc:HGNC:2347]                 | -1.6444906   |
| CREB5      | cAMP responsive element binding protein 5 [Source:HGNC Symbol;Acc:HGNC:16844]                | -1.6096094   |
| CRELD1     | cysteine rich with EGF like domains 1 [Source:HGNC Symbol;Acc:HGNC:14630]                    | -1.1253083   |
| CRHR1      | corticotropin releasing hormone receptor 1 [Source:HGNC Symbol;Acc:HGNC:2357]                | -1.1627062   |
| CRHR2      | corticotropin releasing hormone receptor 2 [Source:HGNC Symbol;Acc:HGNC:2358]                | -1.1677796   |
| CRIP2      | cysteine rich protein 2 [Source:HGNC Symbol;Acc:HGNC:2361]                                   | 1.1835985    |
| CRMP1      | collapsin response mediator protein 1 [Source:HGNC Symbol;Acc:HGNC:2365]                     | -1.1747061   |
| CRNN       | cornulin [Source:HGNC Symbol;Acc:HGNC:1230]                                                  | -1.1120282   |
| CROCCP2    | ciliary rootlet coiled-coil, rootletin pseudogene 2 [Source:HGNC Symbol;Acc:HGNC:28170]      | 1.2071775    |
| CRP        | C-reactive protein, pentraxin-related [Source:HGNC Symbol;Acc:HGNC:2367]                     | -1.1338637   |
| CRTAC1     | cartilage acidic protein 1 [Source:HGNC Symbol;Acc:HGNC:14882]                               | -1.3316295   |
| CRX        | cone-rod homeobox [Source:HGNC Symbol;Acc:HGNC:2383]                                         | -1.1038014   |
| CRYBA4     | crystallin beta A4 [Source:HGNC Symbol;Acc:HGNC:2396]                                        | -1.0678827   |
| CRYGA      | crystallin gamma A [Source:HGNC Symbol;Acc:HGNC:2408]                                        | -1.1254486   |
| CRYGD      | crystallin gamma D [Source:HGNC Symbol;Acc:HGNC:2411]                                        | -1.0746359   |
| CSE1L      | chromosome segregation 1 like [Source:HGNC Symbol;Acc:HGNC:2431]                             | 1.36635325   |
| CSF1       | colony stimulating factor 1 [Source:HGNC Symbol;Acc:HGNC:2432]                               | -1.859645067 |
| CSF2       | colony stimulating factor 2 [Source:HGNC Symbol;Acc:HGNC:2434]                               | -6.7446213   |
| CSF2RB     | colony stimulating factor 2 receptor beta common subunit [Source:HGNC Symbol;Acc:HGNC:2436]  | -1.2695988   |
| CSF3       | colony stimulating factor 3 [Source:HGNC Symbol;Acc:HGNC:2438]                               | 1.0935498    |
| CSGALNACT1 | chondroitin sulfate N-acetylgalactosaminyltransferase 1 [Source:HGNC Symbol;Acc:HGNC:24290]  | 1.1393949    |
| CSMD2      | CSMD and Sushi multiple domains 2 [Source:HGNC Symbol;Acc:HGNC:19290]                        | 1.078597     |
| CSNK1G1    | casein kinase 1 gamma 1 [Source:HGNC Symbol;Acc:HGNC:2454]                                   | -1.1858975   |
| CSNK1G2    | casein kinase 1 gamma 2 [Source:HGNC Symbol;Acc:HGNC:2455]                                   | -1.3353855   |
| CSNK2A2    | casein kinase 2 alpha 2 [Source:HGNC Symbol;Acc:HGNC:2459]                                   | -1.1260507   |
| CSRNP1     | cysteine and serine rich nuclear protein 1 [Source:HGNC Symbol;Acc:HGNC:14300]               | -1.66625475  |
| CSRP2      | cysteine and glycine rich protein 2 [Source:HGNC Symbol;Acc:HGNC:2470]                       | -1.5023353   |
| CSRP2BP    | lysine acetyltransferase 14                                                                  | 1.4702252    |
| CST3       | cystatin C [Source:HGNC Symbol;Acc:HGNC:2475]                                                | -1.2424277   |
| CST6       | cystatin E/M [Source:HGNC Symbol;Acc:HGNC:2478]                                              | -1.0778985   |
| CST8       | cystatin 8 [Source:HGNC Symbol;Acc:HGNC:2480]                                                | 1.0998218    |
| CT45A1     | cancer/testis antigen family 45, member A1 [Source:HGNC Symbol;Acc:HGNC:33267]               | 1.1072483    |
| CTC1       | CTS telomere maintenance complex component 1 [Source:HGNC Symbol;Acc:HGNC:26169]             | -1.363353    |
| CTDNBP1    | CTD nuclear envelope phosphatase 1 [Source:HGNC Symbol;Acc:HGNC:19085]                       | 1.1867591    |
| CTDSP1     | CTD small phosphatase 1 [Source:HGNC Symbol;Acc:HGNC:21614]                                  | 1.4793745    |
| CTDSP2     | CTD small phosphatase 2 [Source:HGNC Symbol;Acc:HGNC:17077]                                  | 1.2208004    |
| CTDSPL     | CTD small phosphatase like [Source:HGNC Symbol;Acc:HGNC:16890]                               | 1.2641559    |
| CTH        | cystathionine gamma-lyase [Source:HGNC Symbol;Acc:HGNC:2501]                                 | 1.2443477    |
| CTHR1      | collagen triple helix repeat containing 1 [Source:HGNC Symbol;Acc:HGNC:18831]                | -1.9386941   |
| CTLA4      | cytotoxic T-lymphocyte associated protein 4 [Source:HGNC Symbol;Acc:HGNC:2505]               | 1.1018863    |
| CTNNA2     | catenin alpha 2 [Source:HGNC Symbol;Acc:HGNC:2510]                                           | 1.0531777    |
| CTNNA1     | catenin alpha like 1 [Source:HGNC Symbol;Acc:HGNC:2512]                                      | 1.6667547    |
| CTNND1     | catenin delta 1 [Source:HGNC Symbol;Acc:HGNC:2515]                                           | 1.0600032    |
| CTNND2     | catenin delta 2 [Source:HGNC Symbol;Acc:HGNC:2516]                                           | -1.0800072   |
| CTRL       | chymotrypsin like [Source:HGNC Symbol;Acc:HGNC:2524]                                         | -1.1494532   |
| CTS8       | cathepsin B [Source:HGNC Symbol;Acc:HGNC:2527]                                               | -1.2449077   |
| CTSC       | cathepsin C [Source:HGNC Symbol;Acc:HGNC:2528]                                               | 1.3861682    |
| CTSE       | cathepsin E [Source:HGNC Symbol;Acc:HGNC:2530]                                               | -1.0979679   |
| CTSG       | cathepsin G [Source:HGNC Symbol;Acc:HGNC:2532]                                               | -1.1364323   |
| CTSK       | cathepsin K [Source:HGNC Symbol;Acc:HGNC:2536]                                               | -1.837117    |
| CTSW       | cathepsin W [Source:HGNC Symbol;Acc:HGNC:2546]                                               | 1.1355982    |
| CUL1       | cullin 1 [Source:HGNC Symbol;Acc:HGNC:2551]                                                  | 1.1490462    |
| CUL3       | cullin 3 [Source:HGNC Symbol;Acc:HGNC:2553]                                                  | 1.1502621    |
| CUL4B      | cullin 4B [Source:HGNC Symbol;Acc:HGNC:2555]                                                 | 1.5395381    |
| CUTC       | cutC copper transporter [Source:HGNC Symbol;Acc:HGNC:24271]                                  | 1.0982262    |
| CWH43      | cell wall biogenesis 43 C-terminal homolog [Source:HGNC Symbol;Acc:HGNC:26133]               | 1.0515262    |
| CX3CL1     | C-X3-C motif chemokine ligand 1 [Source:HGNC Symbol;Acc:HGNC:10647]                          | -7.8765554   |
| CXADR      | coxsackie virus and adenovirus receptor [Source:HGNC Symbol;Acc:HGNC:2559]                   | 1.3749342    |
| CXCL1      | C-X-C motif chemokine ligand 1 [Source:HGNC Symbol;Acc:HGNC:4602]                            | -9.5333325   |
| CXCL11     | C-X-C motif chemokine ligand 11 [Source:HGNC Symbol;Acc:HGNC:10638]                          | -1.2888006   |
| CXCL12     | C-X-C motif chemokine ligand 12 [Source:HGNC Symbol;Acc:HGNC:10672]                          | -1.0890541   |
| CXCL13     | C-X-C motif chemokine ligand 13 [Source:HGNC Symbol;Acc:HGNC:10639]                          | 1.0681758    |
| CXCL14     | C-X-C motif chemokine ligand 14 [Source:HGNC Symbol;Acc:HGNC:10640]                          | 1.1251385    |
| CXCL2      | C-X-C motif chemokine ligand 2 [Source:HGNC Symbol;Acc:HGNC:4603]                            | -12.50969735 |
| CXCL3      | C-X-C motif chemokine ligand 3 [Source:HGNC Symbol;Acc:HGNC:4604]                            | -5.859939    |
| CXCL6      | C-X-C motif chemokine ligand 6 [Source:HGNC Symbol;Acc:HGNC:10643]                           | -1.4627546   |
| CXCR1      | C-X-C motif chemokine receptor 1 [Source:HGNC Symbol;Acc:HGNC:6026]                          | -1.1601862   |
| CXCR3      | C-X-C motif chemokine receptor 3 [Source:HGNC Symbol;Acc:HGNC:4540]                          | -1.0888819   |
| CXCR4      | C-X-C motif chemokine receptor 4 [Source:HGNC Symbol;Acc:HGNC:2561]                          | 1.108087     |
| CXCR6      | C-X-C motif chemokine receptor 6 [Source:HGNC Symbol;Acc:HGNC:16647]                         | 1.055194     |
| CXCR7      | atypical chemokine receptor 3                                                                | -14.334749   |
| CXorf18    | SPANXA2 overlapping transcript 1                                                             | 1.095253     |
| CXorf21    | chromosome X open reading frame 21 [Source:HGNC Symbol;Acc:HGNC:25667]                       | 1.1078659    |

|          |                                                                                           |             |
|----------|-------------------------------------------------------------------------------------------|-------------|
| CXorf36  | chromosome X open reading frame 36 [Source:HGNC Symbol;Acc:HGNC:25866]                    | -1.1323607  |
| CXorf38  | chromosome X open reading frame 38 [Source:HGNC Symbol;Acc:HGNC:28589]                    | -1.2250423  |
| CXorf51  | chromosome X open reading frame 51A                                                       | 1.0736921   |
| CXorf64  | proline rich 32                                                                           | -1.1249257  |
| CXXC5    | CXXC finger protein 5 [Source:HGNC Symbol;Acc:HGNC:26943]                                 | -1.5005684  |
| CYB5A    | cytochrome b5 type A [Source:HGNC Symbol;Acc:HGNC:2570]                                   | -1.29712405 |
| CYB5D1   | cytochrome b5 domain containing 1 [Source:HGNC Symbol;Acc:HGNC:26516]                     | 1.10247     |
| CYB5R2   | cytochrome b5 reductase 2 [Source:HGNC Symbol;Acc:HGNC:24376]                             | -1.6740136  |
| CYB5R3   | cytochrome b5 reductase 3 [Source:HGNC Symbol;Acc:HGNC:2873]                              | 1.3956097   |
| CYB5R4   | cytochrome b5 reductase 4 [Source:HGNC Symbol;Acc:HGNC:20147]                             | 1.1720557   |
| CYB5RL   | cytochrome b5 reductase like [Source:HGNC Symbol;Acc:HGNC:32220]                          | 1.0829794   |
| CYBRD1   | cytochrome b reductase 1 [Source:HGNC Symbol;Acc:HGNC:20797]                              | 1.2041178   |
| CYC1     | cytochrome c1 [Source:HGNC Symbol;Acc:HGNC:2579]                                          | -1.2096454  |
| CYFIP1   | cytoplasmic FMR1 interacting protein 1 [Source:HGNC Symbol;Acc:HGNC:13759]                | -1.1765275  |
| CYLD     | CYLD lysine 63 deubiquitinase [Source:HGNC Symbol;Acc:HGNC:2584]                          | -1.3167466  |
| CYorf15B | taxilin gamma pseudogene, Y-linked                                                        | 1.0742285   |
| CYP11A1  | cytochrome P450 family 11 subfamily A member 1 [Source:HGNC Symbol;Acc:HGNC:2590]         | -1.3378371  |
| CYP19A1  | cytochrome P450 family 19 subfamily A member 1 [Source:HGNC Symbol;Acc:HGNC:2594]         | 1.1069825   |
| CYP1A1   | cytochrome P450 family 1 subfamily A member 1 [Source:HGNC Symbol;Acc:HGNC:2595]          | 1.3860935   |
| CYP26B1  | cytochrome P450 family 26 subfamily B member 1 [Source:HGNC Symbol;Acc:HGNC:20581]        | 1.0655626   |
| CYP2B6   | cytochrome P450 family 2 subfamily B member 6 [Source:HGNC Symbol;Acc:HGNC:2615]          | -1.1604466  |
| CYP2C18  | cytochrome P450 family 2 subfamily C member 18 [Source:HGNC Symbol;Acc:HGNC:2620]         | 1.0651631   |
| CYP2C19  | cytochrome P450 family 2 subfamily C member 19 [Source:HGNC Symbol;Acc:HGNC:2621]         | 1.223847    |
| CYP2R1   | cytochrome P450 family 2 subfamily R member 1 [Source:HGNC Symbol;Acc:HGNC:20580]         | 1.2569096   |
| CYP2U1   | cytochrome P450 family 2 subfamily U member 1 [Source:HGNC Symbol;Acc:HGNC:20582]         | 1.2846699   |
| CYP4A11  | cytochrome P450 family 4 subfamily A member 11 [Source:HGNC Symbol;Acc:HGNC:2642]         | -1.0868634  |
| CYP4A22  | cytochrome P450 family 4 subfamily A member 22 [Source:HGNC Symbol;Acc:HGNC:20575]        | -1.1514848  |
| CYP4V2   | cytochrome P450 family 4 subfamily V member 2 [Source:HGNC Symbol;Acc:HGNC:23198]         | 1.1050348   |
| CYSLTR1  | cysteinyl leukotriene receptor 1 [Source:HGNC Symbol;Acc:HGNC:17451]                      | -1.1258904  |
| CYTH1    | cytohesin 1 [Source:HGNC Symbol;Acc:HGNC:9501]                                            | -1.4833946  |
| CYTH3    | cytohesin 3 [Source:HGNC Symbol;Acc:HGNC:9504]                                            | -1.1836414  |
| CYTH4    | cytohesin 4 [Source:HGNC Symbol;Acc:HGNC:9505]                                            | -1.2447225  |
| CYR1     | cysteine and tyrosine rich 1 [Source:HGNC Symbol;Acc:HGNC:16274]                          | 1.1770687   |
| D2HGDH   | D-2-hydroxyglutarate dehydrogenase [Source:HGNC Symbol;Acc:HGNC:28358]                    | 1.2745272   |
| DAAM2    | dishevelled associated activator of morphogenesis 2 [Source:HGNC Symbol;Acc:HGNC:18143]   | -1.1322964  |
| DAB2IP   | DAB2 interacting protein [Source:HGNC Symbol;Acc:HGNC:17294]                              | 1.1102239   |
| DACH1    | dachshund family transcription factor 1 [Source:HGNC Symbol;Acc:HGNC:2663]                | 1.5632034   |
| DACT2    | dishevelled binding antagonist of beta catenin 2 [Source:HGNC Symbol;Acc:HGNC:21231]      | 1.097339    |
| DACT3    | dishevelled binding antagonist of beta catenin 3 [Source:HGNC Symbol;Acc:HGNC:30745]      | 1.3489164   |
| DAD1     | defender against cell death 1 [Source:HGNC Symbol;Acc:HGNC:2664]                          | -1.0709051  |
| DAG1     | dystroglycan 1 [Source:HGNC Symbol;Acc:HGNC:2666]                                         | 1.08992     |
| DAGLB    | diacylglycerol lipase beta [Source:HGNC Symbol;Acc:HGNC:28923]                            | 1.2434747   |
| DAK      | triokinase and FMN cyclase                                                                | -1.1756042  |
| DAND5    | DAN domain BMP antagonist family member 5 [Source:HGNC Symbol;Acc:HGNC:26780]             | 1.1164163   |
| DAPK2    | death associated protein kinase 2 [Source:HGNC Symbol;Acc:HGNC:2675]                      | -2.6219275  |
| DAPK3    | death associated protein kinase 3 [Source:HGNC Symbol;Acc:HGNC:2676]                      | -1.7319168  |
| DAPL1    | death associated protein like 1 [Source:HGNC Symbol;Acc:HGNC:21490]                       | 1.1656348   |
| DARC     | atypical chemokine receptor 1 (Duffy blood group)                                         | -1.2593654  |
| DARS     | aspartyl-tRNA synthetase [Source:HGNC Symbol;Acc:HGNC:2678]                               | 1.16403     |
| DAXX     | death domain associated protein [Source:HGNC Symbol;Acc:HGNC:2681]                        | -1.4579426  |
| DAZZ     | deleted in azoospermia 2 [Source:HGNC Symbol;Acc:HGNC:15964]                              | 1.060838    |
| DAZAP1   | DAZ associated protein 1 [Source:HGNC Symbol;Acc:HGNC:2683]                               | 1.0811741   |
| DBC1     | cell cycle and apoptosis regulator 2                                                      | 1.0608325   |
| DBIL5P2  | diazepam binding inhibitor-like 5 pseudogene 2 [Source:HGNC Symbol;Acc:HGNC:38518]        | -1.190495   |
| DBT      | dihydroliipoamide branched chain transacylase E2 [Source:HGNC Symbol;Acc:HGNC:2698]       | 1.0566113   |
| DCAF10   | DDB1 and CUL4 associated factor 10 [Source:HGNC Symbol;Acc:HGNC:23686]                    | -1.1582558  |
| DCAF12L1 | DDB1 and CUL4 associated factor 12 like 1 [Source:HGNC Symbol;Acc:HGNC:29395]             | 1.348303    |
| DCAF12L2 | DDB1 and CUL4 associated factor 12 like 2 [Source:HGNC Symbol;Acc:HGNC:32950]             | -1.1793085  |
| DCAF17   | DDB1 and CUL4 associated factor 17 [Source:HGNC Symbol;Acc:HGNC:25784]                    | 1.4117918   |
| DCAF5    | DDB1 and CUL4 associated factor 5 [Source:HGNC Symbol;Acc:HGNC:20224]                     | -1.160475   |
| DCAF6    | DDB1 and CUL4 associated factor 6 [Source:HGNC Symbol;Acc:HGNC:30002]                     | -1.0571734  |
| DCAF8    | DDB1 and CUL4 associated factor 8 [Source:HGNC Symbol;Acc:HGNC:24891]                     | -1.3338059  |
| DCAF8L1  | DDB1 and CUL4 associated factor 8 like 1 [Source:HGNC Symbol;Acc:HGNC:31810]              | -1.0860978  |
| DCBLD1   | discoidin, CUB and LCCL domain containing 1 [Source:HGNC Symbol;Acc:HGNC:21479]           | 1.4889072   |
| DCBLD2   | discoidin, CUB and LCCL domain containing 2 [Source:HGNC Symbol;Acc:HGNC:24627]           | 1.5104313   |
| DCDC2B   | doublecortin domain containing 2B [Source:HGNC Symbol;Acc:HGNC:32576]                     | 1.0810536   |
| DCDC5    | doublecortin domain containing 5                                                          | 1.0958408   |
| DCHS1    | dachsous cadherin-related 1 [Source:HGNC Symbol;Acc:HGNC:13681]                           | 1.1983539   |
| DCLRE1A  | DNA cross-link repair 1A [Source:HGNC Symbol;Acc:HGNC:17660]                              | 1.4012119   |
| DCN      | decorin [Source:HGNC Symbol;Acc:HGNC:2705]                                                | 1.0989908   |
| DCP1B    | decapping mRNA 1B [Source:HGNC Symbol;Acc:HGNC:24451]                                     | 1.1064767   |
| DCST2    | DC-STAMP domain containing 2 [Source:HGNC Symbol;Acc:HGNC:26562]                          | -1.1777972  |
| DCTN5    | dynactin subunit 5 [Source:HGNC Symbol;Acc:HGNC:24594]                                    | -1.2802501  |
| DCUN1D3  | defective in cullin neddylation 1 domain containing 3 [Source:HGNC Symbol;Acc:HGNC:28734] | -1.4613856  |
| DDB1     | damage specific DNA binding protein 1 [Source:HGNC Symbol;Acc:HGNC:2717]                  | -1.1855358  |
| DDB2     | damage specific DNA binding protein 2 [Source:HGNC Symbol;Acc:HGNC:2718]                  | 1.1020458   |
| DDC      | dopa decarboxylase [Source:HGNC Symbol;Acc:HGNC:2719]                                     | 1.1106675   |
| DDIT3    | DNA damage inducible transcript 3 [Source:HGNC Symbol;Acc:HGNC:2726]                      | -1.2038928  |
| DDN      | dendrin [Source:HGNC Symbol;Acc:HGNC:24458]                                               | -1.0941209  |
| DDRGK1   | DDRKG domain containing 1 [Source:HGNC Symbol;Acc:HGNC:16110]                             | -1.2230808  |
| DDTL     | D-dopachrome tautomerase-like [Source:HGNC Symbol;Acc:HGNC:33446]                         | -1.1296269  |
| DDX1     | DEAD/H-box helicase 1 [Source:HGNC Symbol;Acc:HGNC:2734]                                  | 1.2417631   |
| DDX10    | DEAD-box helicase 10 [Source:HGNC Symbol;Acc:HGNC:2735]                                   | 1.4677984   |
| DDX11    | DEAD/H-box helicase 11 [Source:HGNC Symbol;Acc:HGNC:2736]                                 | 1.2632715   |
| DDX19B   | DEAD-box helicase 19B [Source:HGNC Symbol;Acc:HGNC:2742]                                  | -1.136775   |
| DDX27    | DEAD-box helicase 27 [Source:HGNC Symbol;Acc:HGNC:15837]                                  | -1.1201895  |

|                |                                                                                                  |              |
|----------------|--------------------------------------------------------------------------------------------------|--------------|
| DDX31          | DEAD-box helicase 31 [Source:HGNC Symbol;Acc:HGNC:16715]                                         | -1.1445807   |
| DDX39A         | DEAD-box helicase 39A [Source:HGNC Symbol;Acc:HGNC:17821]                                        | -1.1351616   |
| DDX50          | DEAD-box helicase 50 [Source:HGNC Symbol;Acc:HGNC:17906]                                         | 1.1113956    |
| DDX55          | DEAD-box helicase 55 [Source:HGNC Symbol;Acc:HGNC:20085]                                         | 1.2344874    |
| DDX58          | DEXD/H-box helicase 58 [Source:HGNC Symbol;Acc:HGNC:19102]                                       | -2.03503335  |
| DDX6           | DEAD-box helicase 6 [Source:HGNC Symbol;Acc:HGNC:2747]                                           | 1.494621     |
| DEDD           | death effector domain containing [Source:HGNC Symbol;Acc:HGNC:2755]                              | -1.4066712   |
| DEF6           | DEF6, guanine nucleotide exchange factor [Source:HGNC Symbol;Acc:HGNC:2760]                      | -1.1234981   |
| DEFA7P         | defensin alpha 7, pseudogene [Source:HGNC Symbol;Acc:HGNC:31798]                                 | -1.1195017   |
| DEFB1          | defensin beta 1 [Source:HGNC Symbol;Acc:HGNC:2766]                                               | -1.1559272   |
| DEFB103A       | defensin beta 103A [Source:HGNC Symbol;Acc:HGNC:15967]                                           | 1.1889591    |
| DEFB109P1      | defensin beta 109 pseudogene 1 [Source:HGNC Symbol;Acc:HGNC:18090]                               | -1.0843436   |
| DEFB109P1B     | defensin beta 109 pseudogene 1B [Source:HGNC Symbol;Acc:HGNC:33469]                              | 1.1380223    |
| DEFB110        | defensin beta 110 [Source:HGNC Symbol;Acc:HGNC:18091]                                            | -1.0916909   |
| DEFB114        | defensin beta 114 [Source:HGNC Symbol;Acc:HGNC:18095]                                            | 1.134733     |
| DEFB119        | defensin beta 119 [Source:HGNC Symbol;Acc:HGNC:18099]                                            | 1.1038206    |
| DEFB121        | defensin beta 121 [Source:HGNC Symbol;Acc:HGNC:18101]                                            | -1.0653747   |
| DEFB125        | defensin beta 125 [Source:HGNC Symbol;Acc:HGNC:18105]                                            | 1.0649292    |
| DEFB126        | defensin beta 126 [Source:HGNC Symbol;Acc:HGNC:15900]                                            | -1.0762001   |
| DEFB127        | defensin beta 127 [Source:HGNC Symbol;Acc:HGNC:16206]                                            | -1.0581785   |
| DEFB129        | defensin beta 129 [Source:HGNC Symbol;Acc:HGNC:16218]                                            | -1.1291511   |
| DEFB131        | defensin beta 131 [Source:HGNC Symbol;Acc:HGNC:18108]                                            | 1.0855083    |
| DENND2C        | DENN domain containing 2C [Source:HGNC Symbol;Acc:HGNC:24748]                                    | 1.1418628    |
| DENND2D        | DENN domain containing 2D [Source:HGNC Symbol;Acc:HGNC:26192]                                    | -1.9576846   |
| DENND3         | DENN domain containing 3 [Source:HGNC Symbol;Acc:HGNC:29134]                                     | -1.368438333 |
| DEPDC1         | DEP domain containing 1 [Source:HGNC Symbol;Acc:HGNC:22949]                                      | 1.7942548    |
| DEPTOR         | DEP domain containing MTOR-interacting protein [Source:HGNC Symbol;Acc:HGNC:22953]               | -1.0528218   |
| DEXI           | Dexi homolog [Source:HGNC Symbol;Acc:HGNC:13267]                                                 | -1.1713661   |
| DFNB59         | deafness, autosomal recessive 59 [Source:HGNC Symbol;Acc:HGNC:29502]                             | 1.0894096    |
| DGKA           | diacylglycerol kinase alpha [Source:HGNC Symbol;Acc:HGNC:2849]                                   | 1.247584     |
| DGKD           | diacylglycerol kinase delta [Source:HGNC Symbol;Acc:HGNC:2851]                                   | -1.6001997   |
| DGKE           | diacylglycerol kinase epsilon [Source:HGNC Symbol;Acc:HGNC:2852]                                 | 1.1149938    |
| DGUOK          | deoxyguanosine kinase [Source:HGNC Symbol;Acc:HGNC:2858]                                         | -1.0898392   |
| DHCR24         | 24-dehydrocholesterol reductase [Source:HGNC Symbol;Acc:HGNC:2859]                               | 1.2931651    |
| DHCR7          | 7-dehydrocholesterol reductase [Source:HGNC Symbol;Acc:HGNC:2860]                                | -1.2607217   |
| DHDDS          | dehydrodicolichyl diphosphate synthase subunit [Source:HGNC Symbol;Acc:HGNC:20603]               | -1.1430659   |
| DHFR           | dihydrofolate reductase [Source:HGNC Symbol;Acc:HGNC:2861]                                       | -1.0714201   |
| DHRS3          | dehydrogenase/reductase 3 [Source:HGNC Symbol;Acc:HGNC:17693]                                    | -1.5317779   |
| DHRS4          | dehydrogenase/reductase 4 [Source:HGNC Symbol;Acc:HGNC:16985]                                    | -1.0874914   |
| DHRS7          | dehydrogenase/reductase 7 [Source:HGNC Symbol;Acc:HGNC:21524]                                    | -1.1704454   |
| DHRSX          | dehydrogenase/reductase X-linked [Source:HGNC Symbol;Acc:HGNC:18399]                             | -1.1266266   |
| DHTKD1         | dehydrogenase E1 and transketolase domain containing 1 [Source:HGNC Symbol;Acc:HGNC:23537]       | -1.4028864   |
| DHX29          | DEAH-box helicase 29 [Source:HGNC Symbol;Acc:HGNC:15815]                                         | 1.4496934    |
| DHX32          | DEAH-box helicase 32 (putative) [Source:HGNC Symbol;Acc:HGNC:16717]                              | 1.1722004    |
| DHX57          | DEAH-box helicase 57 [Source:HGNC Symbol;Acc:HGNC:20086]                                         | 1.1725931    |
| DHX58          | DEXH-box helicase 58 [Source:HGNC Symbol;Acc:HGNC:29517]                                         | -1.6872457   |
| DIABLO         | diablo IAP-binding mitochondrial protein [Source:HGNC Symbol;Acc:HGNC:21528]                     | -1.0802038   |
| DID10          | death inducer-obliterator 1 [Source:HGNC Symbol;Acc:HGNC:2680]                                   | -1.250554667 |
| DIP2A          | disco interacting protein 2 homolog A [Source:HGNC Symbol;Acc:HGNC:17217]                        | -1.1740835   |
| DIRA52         | DIRAS family GTPase 2 [Source:HGNC Symbol;Acc:HGNC:19323]                                        | 1.0895224    |
| DIRC2          | disrupted in renal carcinoma 2 [Source:HGNC Symbol;Acc:HGNC:16628]                               | -1.14381065  |
| DIS3           | 3 homolog, exosome endoribonuclease and 3'-5' exoribonuclease [Source:HGNC Symbol;Acc:HGNC:206]  | 1.176632     |
| DIS3L          | DIS3 like exosome 3'-5' exoribonuclease [Source:HGNC Symbol;Acc:HGNC:28698]                      | 1.3491099    |
| DISP1          | dispatched RND transporter family member 1 [Source:HGNC Symbol;Acc:HGNC:19711]                   | 1.0960468    |
| DXDC1          | DIX domain containing 1 [Source:HGNC Symbol;Acc:HGNC:23695]                                      | 1.1372764    |
| DKFZP434K028   | uncharacterized LOC26070                                                                         | -1.077371    |
| DKFZP434L187   | uncharacterized LOC26082                                                                         | 1.1501323    |
| DKFZP686115217 | long intergenic non-protein coding RNA 1011                                                      | -1.1108372   |
| DKFZP68601327  | testis expressed 41 (non-protein coding)                                                         | -1.3920181   |
| DKK2           | dickkopf WNT signaling pathway inhibitor 2 [Source:HGNC Symbol;Acc:HGNC:2892]                    | 1.0658523    |
| DKK3           | dickkopf WNT signaling pathway inhibitor 3 [Source:HGNC Symbol;Acc:HGNC:2893]                    | -1.2618476   |
| DLAT           | dihydrolipamide S-acetyltransferase [Source:HGNC Symbol;Acc:HGNC:2896]                           | 1.3758544    |
| DLEU1          | deleted in lymphocytic leukemia 1 [Source:HGNC Symbol;Acc:HGNC:13747]                            | 1.1873877    |
| DLEU2L         | deleted in lymphocytic leukemia 2-like [Source:HGNC Symbol;Acc:HGNC:13225]                       | 1.0803314    |
| DLGAP3         | DLG associated protein 3 [Source:HGNC Symbol;Acc:HGNC:30368]                                     | -1.1644888   |
| DLGAP4         | DLG associated protein 4 [Source:HGNC Symbol;Acc:HGNC:24476]                                     | -1.1471112   |
| DLGAP5         | DLG associated protein 5 [Source:HGNC Symbol;Acc:HGNC:16864]                                     | 1.671802     |
| DLK2           | delta like non-canonical Notch ligand 2 [Source:HGNC Symbol;Acc:HGNC:21113]                      | -1.2348998   |
| DLL1           | delta like canonical Notch ligand 1 [Source:HGNC Symbol;Acc:HGNC:2908]                           | 1.0888776    |
| DLX2           | distal-less homeobox 2 [Source:HGNC Symbol;Acc:HGNC:2915]                                        | 1.0856155    |
| DLX5           | distal-less homeobox 5 [Source:HGNC Symbol;Acc:HGNC:2918]                                        | 1.0703852    |
| DMD            | dystrophin [Source:HGNC Symbol;Acc:HGNC:2928]                                                    | 1.1004931    |
| DMRTA1         | DMRT like family A1 [Source:HGNC Symbol;Acc:HGNC:13826]                                          | 1.1460854    |
| DMXL2          | Dmx like 2 [Source:HGNC Symbol;Acc:HGNC:2938]                                                    | 1.1173317    |
| DNAAF1         | dynein axonemal assembly factor 1 [Source:HGNC Symbol;Acc:HGNC:30539]                            | 1.1140326    |
| DNAH10         | dynein axonemal heavy chain 10 [Source:HGNC Symbol;Acc:HGNC:2941]                                | 1.1869098    |
| DNAH10O5       | dynein axonemal heavy chain 10 opposite strand [Source:HGNC Symbol;Acc:HGNC:37121]               | -1.1655846   |
| DNAH17         | dynein axonemal heavy chain 17 [Source:HGNC Symbol;Acc:HGNC:2946]                                | 1.12843      |
| DNAH2          | dynein axonemal heavy chain 2 [Source:HGNC Symbol;Acc:HGNC:2948]                                 | -1.1530064   |
| DNAI1          | dynein axonemal intermediate chain 1 [Source:HGNC Symbol;Acc:HGNC:2954]                          | -1.1280396   |
| DNAJA1         | DnaJ heat shock protein family (Hsp40) member A1 [Source:HGNC Symbol;Acc:HGNC:5229]              | -1.666193    |
| DNAJA1P5       | DnaJ heat shock protein family (Hsp40) member A1 pseudogene 5 [Source:HGNC Symbol;Acc:HGNC:3934] | -1.5662454   |
| DNAJB4         | DnaJ heat shock protein family (Hsp40) member B4 [Source:HGNC Symbol;Acc:HGNC:14886]             | 2.4465613    |
| DNAJB5         | DnaJ heat shock protein family (Hsp40) member B5 [Source:HGNC Symbol;Acc:HGNC:14887]             | -1.2877755   |
| DNAJB7         | DnaJ heat shock protein family (Hsp40) member B7 [Source:HGNC Symbol;Acc:HGNC:24986]             | 1.1513389    |
| DNAJC2         | DnaJ heat shock protein family (Hsp40) member C2 [Source:HGNC Symbol;Acc:HGNC:13192]             | 1.4854336    |

|                                             |                                                                                                 |              |
|---------------------------------------------|-------------------------------------------------------------------------------------------------|--------------|
| DNAJC5                                      | DnaJ heat shock protein family (Hsp40) member C5 [Source:HGNC Symbol;Acc:HGNC:16235]            | -1.2373856   |
| DNAJC5G                                     | DnaJ heat shock protein family (Hsp40) member C5 gamma [Source:HGNC Symbol;Acc:HGNC:24844]      | -1.0776639   |
| DNAJC7                                      | DnaJ heat shock protein family (Hsp40) member C7 [Source:HGNC Symbol;Acc:HGNC:12392]            | 1.2758703    |
| DND1                                        | DND microRNA-mediated repression inhibitor 1 [Source:HGNC Symbol;Acc:HGNC:23799]                | 1.1042858    |
| DNER                                        | delta/notch like EGF repeat containing [Source:HGNC Symbol;Acc:HGNC:24456]                      | 1.0853204    |
| DNH01                                       | dynein heavy chain domain 1 [Source:HGNC Symbol;Acc:HGNC:26532]                                 | 1.0947062    |
| DNM2                                        | dynamain 2 [Source:HGNC Symbol;Acc:HGNC:2974]                                                   | 1.2012839    |
| DNM3                                        | dynamain 3 [Source:HGNC Symbol;Acc:HGNC:29125]                                                  | 1.0869591    |
| DNMT3A                                      | DNA methyltransferase 3 alpha [Source:HGNC Symbol;Acc:HGNC:2978]                                | -1.3591165   |
| DNMT3B                                      | DNA methyltransferase 3 beta [Source:HGNC Symbol;Acc:HGNC:2979]                                 | 1.1827402    |
| DNMT3L                                      | DNA methyltransferase 3 like [Source:HGNC Symbol;Acc:HGNC:2980]                                 | -1.0724828   |
| DNPEP                                       | aspartyl aminopeptidase [Source:HGNC Symbol;Acc:HGNC:2981]                                      | -1.320053    |
| DOCK6                                       | dedicator of cytokinesis 6 [Source:HGNC Symbol;Acc:HGNC:19189]                                  | 1.1956887    |
| DOCK7                                       | dedicator of cytokinesis 7 [Source:HGNC Symbol;Acc:HGNC:19190]                                  | 1.5407163    |
| DOCK9                                       | dedicator of cytokinesis 9 [Source:HGNC Symbol;Acc:HGNC:14132]                                  | -1.223552    |
| DOK4                                        | docking protein 4 [Source:HGNC Symbol;Acc:HGNC:19868]                                           | 1.3267583    |
| DOK5                                        | docking protein 5 [Source:HGNC Symbol;Acc:HGNC:16173]                                           | -1.7620904   |
| DOK7                                        | docking protein 7 [Source:HGNC Symbol;Acc:HGNC:26594]                                           | 1.0998422    |
| DONSON                                      | downstream neighbor of SON [Source:HGNC Symbol;Acc:HGNC:2993]                                   | 1.1744759    |
| DOT1L                                       | DOT1 like histone lysine methyltransferase [Source:HGNC Symbol;Acc:HGNC:24948]                  | -1.2630701   |
| DPCD                                        | deleted in primary ciliary dyskinesia homolog (mouse) [Source:HGNC Symbol;Acc:HGNC:24542]       | -1.1380336   |
| DPF2                                        | double PHD fingers 2 [Source:HGNC Symbol;Acc:HGNC:9964]                                         | 1.1379308    |
| DPF3                                        | double PHD fingers 3 [Source:HGNC Symbol;Acc:HGNC:17427]                                        | -1.517012925 |
| DPH3                                        | diphthamide biosynthesis 3 [Source:HGNC Symbol;Acc:HGNC:27717]                                  | -1.1696813   |
| DPH3P1                                      | diphthamide biosynthesis 3 pseudogene 1 [Source:HGNC Symbol;Acc:HGNC:16136]                     | -1.1200739   |
| DPH5                                        | diphthamide biosynthesis 5 [Source:HGNC Symbol;Acc:HGNC:24270]                                  | -1.206536    |
| DPP9                                        | dipeptidyl peptidase 9 [Source:HGNC Symbol;Acc:HGNC:18648]                                      | -1.1943061   |
| DPT                                         | dermatopontin [Source:HGNC Symbol;Acc:HGNC:3011]                                                | -1.217323    |
| DPY19L1                                     | dpy-19 like 1 [Source:HGNC Symbol;Acc:HGNC:22205]                                               | 1.2373129    |
| DPY19L2P2                                   | DPY19L2 pseudogene 2 [Source:HGNC Symbol;Acc:HGNC:21764]                                        | 1.1666224    |
| DOX1                                        | DEAQ-box RNA dependent ATPase 1 [Source:HGNC Symbol;Acc:HGNC:20410]                             | -1.133204    |
| DR1                                         | down-regulator of transcription 1 [Source:HGNC Symbol;Acc:HGNC:3017]                            | -1.3932658   |
| DRAM1                                       | DNA damage regulated autophagy modulator 1 [Source:HGNC Symbol;Acc:HGNC:25645]                  | -1.6728582   |
| DRD4                                        | dopamine receptor D4 [Source:HGNC Symbol;Acc:HGNC:3025]                                         | 1.1841228    |
| DRD5                                        | dopamine receptor D5 [Source:HGNC Symbol;Acc:HGNC:3026]                                         | -1.1729592   |
| DSCAM                                       | DS cell adhesion molecule [Source:HGNC Symbol;Acc:HGNC:3039]                                    | -1.1684315   |
| DSCR10                                      | Down syndrome critical region 10 (non-protein coding) [Source:HGNC Symbol;Acc:HGNC:16302]       | -1.2796013   |
| DSCR3                                       | DSCR3 arrestin fold containing [Source:HGNC Symbol;Acc:HGNC:3044]                               | -1.110164    |
| DSCR8                                       | Down syndrome critical region 8 [Source:HGNC Symbol;Acc:HGNC:16707]                             | 1.097571     |
| DSE                                         | dermatan sulfate epimerase [Source:HGNC Symbol;Acc:HGNC:21144]                                  | -1.4986777   |
| DSEL                                        | dermatan sulfate epimerase-like [Source:HGNC Symbol;Acc:HGNC:18144]                             | -1.2486271   |
| DSPP                                        | dentin sialophosphoprotein [Source:HGNC Symbol;Acc:HGNC:3054]                                   | 1.07887185   |
| DSTYK                                       | dual serine/threonine and tyrosine protein kinase [Source:HGNC Symbol;Acc:HGNC:29043]           | -1.1395392   |
| DTL                                         | denticless E3 ubiquitin protein ligase homolog [Source:HGNC Symbol;Acc:HGNC:30288]              | 1.5213585    |
| DTNA                                        | dystrobrevin alpha [Source:HGNC Symbol;Acc:HGNC:3057]                                           | 1.0739483    |
| DTX2P1-UPK3BP1-PMS2P11 X2P1-UPK3BP1-PMS2P11 | readthrough, transcribed pseudogene [Source:HGNC Symbol;Acc:HGNC:4236]                          | -1.1842337   |
| DTX3                                        | deltex E3 ubiquitin ligase 3 [Source:HGNC Symbol;Acc:HGNC:24457]                                | 1.1237551    |
| DTX3L                                       | deltex E3 ubiquitin ligase 3L [Source:HGNC Symbol;Acc:HGNC:30323]                               | -1.88932     |
| DTYMK                                       | deoxythymidylate kinase [Source:HGNC Symbol;Acc:HGNC:3061]                                      | -1.0985533   |
| DUS1L                                       | dihydrouridine synthase 1 like [Source:HGNC Symbol;Acc:HGNC:30086]                              | -1.1729836   |
| DUSP11                                      | dual specificity phosphatase 11 [Source:HGNC Symbol;Acc:HGNC:3066]                              | -1.1125304   |
| DUSP14                                      | dual specificity phosphatase 14 [Source:HGNC Symbol;Acc:HGNC:17007]                             | 1.1705328    |
| DUSP16                                      | dual specificity phosphatase 16 [Source:HGNC Symbol;Acc:HGNC:17909]                             | -1.1610054   |
| DUSP22                                      | dual specificity phosphatase 22 [Source:HGNC Symbol;Acc:HGNC:16077]                             | -1.1626757   |
| DUSP23                                      | dual specificity phosphatase 23 [Source:HGNC Symbol;Acc:HGNC:21480]                             | 1.3084495    |
| DUSP27                                      | dual specificity phosphatase 27 (putative) [Source:HGNC Symbol;Acc:HGNC:25034]                  | -1.0605184   |
| DUSP3                                       | dual specificity phosphatase 3 [Source:HGNC Symbol;Acc:HGNC:3069]                               | -1.4581567   |
| DUSP4                                       | dual specificity phosphatase 4 [Source:HGNC Symbol;Acc:HGNC:3070]                               | 1.9665419    |
| DUSP5                                       | dual specificity phosphatase 5 [Source:HGNC Symbol;Acc:HGNC:3071]                               | -1.6911609   |
| DUSP8                                       | dual specificity phosphatase 8 [Source:HGNC Symbol;Acc:HGNC:3074]                               | -1.2854617   |
| DUXA                                        | double homeobox A [Source:HGNC Symbol;Acc:HGNC:32179]                                           | -1.1215689   |
| DVL1                                        | dishevelled segment polarity protein 1 [Source:HGNC Symbol;Acc:HGNC:3084]                       | 1.2205336    |
| DVL2                                        | dishevelled segment polarity protein 2 [Source:HGNC Symbol;Acc:HGNC:3086]                       | 1.464206     |
| DYNC1L1                                     | dynein cytoplasmic 1 light intermediate chain 1 [Source:HGNC Symbol;Acc:HGNC:18745]             | 1.2483132    |
| DYNC2L1                                     | dynein cytoplasmic 2 light intermediate chain 1 [Source:HGNC Symbol;Acc:HGNC:24595]             | -1.1046063   |
| DYNLRB1                                     | dynein light chain roadblock-type 1 [Source:HGNC Symbol;Acc:HGNC:15468]                         | -1.1551585   |
| DYNLT1                                      | dynein light chain Tctex-type 1 [Source:HGNC Symbol;Acc:HGNC:11697]                             | -1.1994211   |
| DYRK3                                       | dual specificity tyrosine phosphorylation regulated kinase 3 [Source:HGNC Symbol;Acc:HGNC:3094] | -1.2630743   |
| E2F4                                        | E2F transcription factor 4 [Source:HGNC Symbol;Acc:HGNC:3118]                                   | 1.2095329    |
| E2F8                                        | E2F transcription factor 8 [Source:HGNC Symbol;Acc:HGNC:24727]                                  | 1.6150968    |
| EAPP                                        | E2F associated phosphoprotein [Source:HGNC Symbol;Acc:HGNC:19312]                               | 1.1342822    |
| EAR52                                       | glutamyl-tRNA synthetase 2, mitochondrial [Source:HGNC Symbol;Acc:HGNC:29419]                   | 1.2250125    |
| EBF2                                        | early B-cell factor 2 [Source:HGNC Symbol;Acc:HGNC:19090]                                       | -1.1474425   |
| EBF3                                        | early B-cell factor 3 [Source:HGNC Symbol;Acc:HGNC:19087]                                       | 1.26155255   |
| EBF4                                        | early B-cell factor 4 [Source:HGNC Symbol;Acc:HGNC:29278]                                       | -1.1566467   |
| EBI3                                        | Epstein-Barr virus induced 3 [Source:HGNC Symbol;Acc:HGNC:3129]                                 | -7.3279433   |
| EBP                                         | emopamil binding protein (sterol isomerase) [Source:HGNC Symbol;Acc:HGNC:3133]                  | 1.174145     |
| EBPL                                        | emopamil binding protein like [Source:HGNC Symbol;Acc:HGNC:18061]                               | 1.286869     |
| ECE1                                        | endothelin converting enzyme 1 [Source:HGNC Symbol;Acc:HGNC:3146]                               | -1.1795846   |
| ECE2                                        | endothelin converting enzyme 2 [Source:HGNC Symbol;Acc:HGNC:13275]                              | -1.1198297   |
| ECHDC1                                      | ethylmalonyl-CoA decarboxylase 1 [Source:HGNC Symbol;Acc:HGNC:21489]                            | 1.1304486    |
| ECHS1                                       | enoyl-CoA hydratase, short chain 1 [Source:HGNC Symbol;Acc:HGNC:3151]                           | -1.2449684   |
| EDA                                         | ectodysplasin A [Source:HGNC Symbol;Acc:HGNC:3157]                                              | 1.1657732    |
| EDAR                                        | ectodysplasin A receptor [Source:HGNC Symbol;Acc:HGNC:2895]                                     | 1.0503049    |
| EDC3                                        | enhancer of mRNA decapping 3 [Source:HGNC Symbol;Acc:HGNC:26114]                                | -1.3001764   |
| EDC4                                        | enhancer of mRNA decapping 4 [Source:HGNC Symbol;Acc:HGNC:17157]                                | -1.2234017   |

|           |                                                                                                       |            |
|-----------|-------------------------------------------------------------------------------------------------------|------------|
| EDEM3     | ER degradation enhancing alpha-mannosidase like protein 3 [Source:HGNC Symbol;Acc:HGNC:16787]         | 1.1182569  |
| EDN3      | endothelin 3 [Source:HGNC Symbol;Acc:HGNC:3178]                                                       | -1.1606373 |
| EDNRA     | endothelin receptor type A [Source:HGNC Symbol;Acc:HGNC:3179]                                         | -1.147842  |
| EFCAB2    | EF-hand calcium binding domain 2 [Source:HGNC Symbol;Acc:HGNC:28166]                                  | 1.1428593  |
| EFCAB4B   | calcium release activated channel regulator 2A                                                        | -1.132601  |
| EFCAB5    | EF-hand calcium binding domain 5 [Source:HGNC Symbol;Acc:HGNC:24801]                                  | 1.0997818  |
| EFCAB9    | EF-hand calcium binding domain 9 [Source:HGNC Symbol;Acc:HGNC:34530]                                  | -1.4674324 |
| EFHA1     | mitochondrial calcium uptake 2                                                                        | 1.4516697  |
| EFHD2     | EF-hand domain family member D2 [Source:HGNC Symbol;Acc:HGNC:28670]                                   | -1.121864  |
| EFNA1     | ephrin A1 [Source:HGNC Symbol;Acc:HGNC:3221]                                                          | -4.0122566 |
| EFNB1     | ephrin B1 [Source:HGNC Symbol;Acc:HGNC:3226]                                                          | -2.367385  |
| EFNB3     | ephrin B3 [Source:HGNC Symbol;Acc:HGNC:3228]                                                          | -1.1695634 |
| EFR3A     | EFR3 homolog A [Source:HGNC Symbol;Acc:HGNC:28970]                                                    | 1.5596405  |
| EGFL7     | EGF like domain multiple 7 [Source:HGNC Symbol;Acc:HGNC:20594]                                        | 1.8818054  |
| EGFR      | epidermal growth factor receptor [Source:HGNC Symbol;Acc:HGNC:3236]                                   | -1.299817  |
| EGLN1     | egl-9 family hypoxia inducible factor 1 [Source:HGNC Symbol;Acc:HGNC:1232]                            | -1.338289  |
| EGLN2     | egl-9 family hypoxia inducible factor 2 [Source:HGNC Symbol;Acc:HGNC:14660]                           | -1.2420547 |
| EGR1      | early growth response 1 [Source:HGNC Symbol;Acc:HGNC:3238]                                            | -1.3900765 |
| EGR3      | early growth response 3 [Source:HGNC Symbol;Acc:HGNC:3240]                                            | -1.0901271 |
| EHBP1     | EH domain binding protein 1 [Source:HGNC Symbol;Acc:HGNC:29144]                                       | 1.1500909  |
| EHBP11    | EH domain binding protein 1 like 1 [Source:HGNC Symbol;Acc:HGNC:30682]                                | -1.1504953 |
| EHD1      | EH domain containing 1 [Source:HGNC Symbol;Acc:HGNC:3242]                                             | -2.0393786 |
| EHD2      | EH domain containing 2 [Source:HGNC Symbol;Acc:HGNC:3243]                                             | 1.1929669  |
| EHD4      | EH domain containing 4 [Source:HGNC Symbol;Acc:HGNC:3245]                                             | -1.1534959 |
| EHMT1     | euchromatic histone lysine methyltransferase 1 [Source:HGNC Symbol;Acc:HGNC:24650]                    | -1.1291439 |
| EHMT2     | euchromatic histone lysine methyltransferase 2 [Source:HGNC Symbol;Acc:HGNC:14129]                    | 1.3164546  |
| EIF1AX    | eukaryotic translation initiation factor 1A, X-linked [Source:HGNC Symbol;Acc:HGNC:3250]              | 1.3421187  |
| EIF1B     | eukaryotic translation initiation factor 1B [Source:HGNC Symbol;Acc:HGNC:30792]                       | -1.1926552 |
| EIF2AK1   | eukaryotic translation initiation factor 2 alpha kinase 1 [Source:HGNC Symbol;Acc:HGNC:24921]         | -1.207122  |
| EIF2C1    | argonaute 1, RISC catalytic component                                                                 | -1.1766923 |
| EIF2C2    | argonaute 2, RISC catalytic component                                                                 | -1.4192165 |
| EIF2C3    | argonaute 3, RISC catalytic component                                                                 | -1.2021523 |
| EIF2S1    | eukaryotic translation initiation factor 2 subunit alpha [Source:HGNC Symbol;Acc:HGNC:3265]           | 1.2025362  |
| EIF3D     | eukaryotic translation initiation factor 3 subunit D [Source:HGNC Symbol;Acc:HGNC:3278]               | -1.2524226 |
| EIF3E     | eukaryotic translation initiation factor 3 subunit E [Source:HGNC Symbol;Acc:HGNC:3277]               | 1.657031   |
| EIF3F     | eukaryotic translation initiation factor 3 subunit F [Source:HGNC Symbol;Acc:HGNC:3275]               | -1.065591  |
| EIF4A1    | eukaryotic translation initiation factor 4A1 [Source:HGNC Symbol;Acc:HGNC:3282]                       | 1.1480283  |
| EIF4A3    | eukaryotic translation initiation factor 4A3 [Source:HGNC Symbol;Acc:HGNC:18683]                      | 1.183338   |
| EIF4E2    | eukaryotic translation initiation factor 4E family member 2 [Source:HGNC Symbol;Acc:HGNC:3293]        | -1.1510102 |
| EIF4EBP1  | eukaryotic translation initiation factor 4E binding protein 1 [Source:HGNC Symbol;Acc:HGNC:3288]      | 1.1354073  |
| EIF4EBP2  | eukaryotic translation initiation factor 4E binding protein 2 [Source:HGNC Symbol;Acc:HGNC:3289]      | 1.1208414  |
| EIF4ENIF1 | ukaryotic translation initiation factor 4E nuclear import factor 1 [Source:HGNC Symbol;Acc:HGNC:1668] | -1.1831337 |
| EIF4H     | eukaryotic translation initiation factor 4H [Source:HGNC Symbol;Acc:HGNC:12741]                       | -1.1992096 |
| EIF5A     | eukaryotic translation initiation factor 5A [Source:HGNC Symbol;Acc:HGNC:3300]                        | 1.2836711  |
| ELAVL2    | ELAV like neuron-specific RNA binding protein 2 [Source:HGNC Symbol;Acc:HGNC:3313]                    | 1.1683027  |
| ELF4      | E74 like ETS transcription factor 4 [Source:HGNC Symbol;Acc:HGNC:3319]                                | -1.3874252 |
| ELK1      | ELK1, ETS transcription factor [Source:HGNC Symbol;Acc:HGNC:3321]                                     | 1.1894788  |
| ELL2      | elongation factor for RNA polymerase II 2 [Source:HGNC Symbol;Acc:HGNC:17064]                         | -1.2212749 |
| ELMO2     | engulfment and cell motility 2 [Source:HGNC Symbol;Acc:HGNC:17233]                                    | -1.1928166 |
| ELN       | elastin [Source:HGNC Symbol;Acc:HGNC:3327]                                                            | -1.1903949 |
| ELOVL1    | ELOVL fatty acid elongase 1 [Source:HGNC Symbol;Acc:HGNC:14418]                                       | -1.1828214 |
| ELOVL4    | ELOVL fatty acid elongase 4 [Source:HGNC Symbol;Acc:HGNC:14415]                                       | 1.2773852  |
| ELTD1     | adhesion G protein-coupled receptor L4                                                                | 1.60149285 |
| EMCN      | endomucin [Source:HGNC Symbol;Acc:HGNC:16041]                                                         | 1.4838629  |
| EMG1      | EMG1, N1-specific pseudouridine methyltransferase [Source:HGNC Symbol;Acc:HGNC:16912]                 | -1.1863599 |
| EMILIN3   | elastin microfibril interfacer 3 [Source:HGNC Symbol;Acc:HGNC:16123]                                  | -1.2361492 |
| EML1      | echinoderm microtubule associated protein like 1 [Source:HGNC Symbol;Acc:HGNC:3330]                   | 1.1799785  |
| EML3      | echinoderm microtubule associated protein like 3 [Source:HGNC Symbol;Acc:HGNC:26666]                  | 1.3895365  |
| EML5      | echinoderm microtubule associated protein like 5 [Source:HGNC Symbol;Acc:HGNC:18197]                  | 1.1199621  |
| EML6      | echinoderm microtubule associated protein like 6 [Source:HGNC Symbol;Acc:HGNC:35412]                  | 1.1467834  |
| EMP3      | epithelial membrane protein 3 [Source:HGNC Symbol;Acc:HGNC:3335]                                      | -1.223551  |
| EMX2OS    | EMX2 opposite strand/antisense RNA [Source:HGNC Symbol;Acc:HGNC:18511]                                | 1.060556   |
| ENAH      | enabled homolog (Drosophila) [Source:HGNC Symbol;Acc:HGNC:18271]                                      | 1.1233554  |
| ENDOD1    | endonuclease domain containing 1 [Source:HGNC Symbol;Acc:HGNC:29129]                                  | 1.3225248  |
| ENG       | endoglin [Source:HGNC Symbol;Acc:HGNC:3349]                                                           | 1.2331437  |
| ENHO      | energy homeostasis associated [Source:HGNC Symbol;Acc:HGNC:24838]                                     | -1.1172864 |
| ENO2      | enolase 2 [Source:HGNC Symbol;Acc:HGNC:3353]                                                          | 1.228249   |
| ENPP5     | ectonucleotide pyrophosphatase/phosphodiesterase 5 (putative) [Source:HGNC Symbol;Acc:HGNC:1371]      | 1.0907967  |
| ENTPD1    | ectonucleoside triphosphate diphosphohydrolase 1 [Source:HGNC Symbol;Acc:HGNC:3363]                   | 1.0548581  |
| ENTPD2    | ectonucleoside triphosphate diphosphohydrolase 2 [Source:HGNC Symbol;Acc:HGNC:3364]                   | -1.2220347 |
| ENTPD5    | ectonucleoside triphosphate diphosphohydrolase 5 [Source:HGNC Symbol;Acc:HGNC:3367]                   | 1.0896422  |
| ENTPD6    | ectonucleoside triphosphate diphosphohydrolase 6 (putative) [Source:HGNC Symbol;Acc:HGNC:3368]        | -1.1892891 |
| ENTPD7    | ectonucleoside triphosphate diphosphohydrolase 7 [Source:HGNC Symbol;Acc:HGNC:19745]                  | -1.1319438 |
| OMES      | eomesodermin [Source:HGNC Symbol;Acc:HGNC:3372]                                                       | 1.0848895  |
| EP400NL   | EP400 N-terminal like [Source:HGNC Symbol;Acc:HGNC:26602]                                             | -1.1098138 |
| EPB41L1   | erythrocyte membrane protein band 4.1 like 1 [Source:HGNC Symbol;Acc:HGNC:3378]                       | -1.1830696 |
| EPB49     | dematin actin binding protein                                                                         | 1.3098614  |
| EPC2      | enhancer of polycomb homolog 2 [Source:HGNC Symbol;Acc:HGNC:24543]                                    | 1.2227528  |
| EPHA2     | EPH receptor A2 [Source:HGNC Symbol;Acc:HGNC:3386]                                                    | -1.2691249 |
| EPHB4     | EPH receptor B4 [Source:HGNC Symbol;Acc:HGNC:3395]                                                    | 1.2669405  |
| EPHX1     | epoxide hydrolase 1 [Source:HGNC Symbol;Acc:HGNC:3401]                                                | 1.1209075  |
| EPHX2     | epoxide hydrolase 2 [Source:HGNC Symbol;Acc:HGNC:3402]                                                | -1.0825481 |
| EPM2A     | epilepsy, progressive myoclonus type 2A, Lafora disease (laforin) [Source:HGNC Symbol;Acc:HGNC:3413]  | -1.1401364 |
| EPRS      | glutamyl-prolyl-tRNA synthetase [Source:HGNC Symbol;Acc:HGNC:3418]                                    | 1.7862285  |
| EPS8L1    | EPS8 like 1 [Source:HGNC Symbol;Acc:HGNC:21295]                                                       | -2.1828158 |
| ERCC5     | ERCC excision repair 5, endonuclease [Source:HGNC Symbol;Acc:HGNC:3437]                               | 1.5793844  |

|               |                                                                                                      |             |
|---------------|------------------------------------------------------------------------------------------------------|-------------|
| ERCC6         | ERCC excision repair 6, chromatin remodeling factor [Source:HGNC Symbol;Acc:HGNC:3438]               | 1.4538237   |
| ERCC6L        | RCC excision repair 6 like, spindle assembly checkpoint helicase [Source:HGNC Symbol;Acc:HGNC:20794] | 1.2393249   |
| ERF           | ETS2 repressor factor [Source:HGNC Symbol;Acc:HGNC:3444]                                             | 1.4446235   |
| ER1           | exoribonuclease 1 [Source:HGNC Symbol;Acc:HGNC:23994]                                                | 1.2119555   |
| ERLEC1        | endoplasmic reticulum lectin 1 [Source:HGNC Symbol;Acc:HGNC:25222]                                   | 1.2333854   |
| ERLIN2        | ER lipid raft associated 2 [Source:HGNC Symbol;Acc:HGNC:1356]                                        | -1.1322606  |
| ERP27         | endoplasmic reticulum protein 27 [Source:HGNC Symbol;Acc:HGNC:26495]                                 | 1.0941213   |
| ERP29         | endoplasmic reticulum protein 29 [Source:HGNC Symbol;Acc:HGNC:13799]                                 | 1.1336172   |
| ERRF1         | ERBB receptor feedback inhibitor 1 [Source:HGNC Symbol;Acc:HGNC:18185]                               | 1.4890271   |
| ERV3-1        | endogenous retrovirus group 3 member 1 [Source:HGNC Symbol;Acc:HGNC:3454]                            | 1.0638402   |
| ERVV-2        | endogenous retrovirus group V member 2 [Source:HGNC Symbol;Acc:HGNC:39051]                           | 1.102484    |
| ESAM          | endothelial cell adhesion molecule [Source:HGNC Symbol;Acc:HGNC:17474]                               | 1.197814    |
| ESCO1         | establishment of sister chromatid cohesion N-acetyltransferase 1 [Source:HGNC Symbol;Acc:HGNC:2464]  | 1.1774127   |
| ESD           | esterase D [Source:HGNC Symbol;Acc:HGNC:3465]                                                        | 1.2406377   |
| ETF1          | eukaryotic translation termination factor 1 [Source:HGNC Symbol;Acc:HGNC:3477]                       | 1.2201648   |
| ETNK1         | ethanolamine kinase 1 [Source:HGNC Symbol;Acc:HGNC:24649]                                            | -1.1791266  |
| ETNK2         | ethanolamine kinase 2 [Source:HGNC Symbol;Acc:HGNC:25575]                                            | 1.1992302   |
| ETS1          | ETS proto-oncogene 1, transcription factor [Source:HGNC Symbol;Acc:HGNC:3488]                        | -1.9341439  |
| ETS2          | ETS proto-oncogene 2, transcription factor [Source:HGNC Symbol;Acc:HGNC:3489]                        | -1.6591127  |
| ETV1          | ETS variant 1 [Source:HGNC Symbol;Acc:HGNC:3490]                                                     | 1.37350565  |
| ETV3          | ETS variant 3 [Source:HGNC Symbol;Acc:HGNC:3492]                                                     | -1.2142553  |
| ETV3L         | ETS variant 3 like [Source:HGNC Symbol;Acc:HGNC:33834]                                               | -1.1681204  |
| ETV6          | ETS variant 6 [Source:HGNC Symbol;Acc:HGNC:3495]                                                     | -1.4474646  |
| ETV7          | ETS variant 7 [Source:HGNC Symbol;Acc:HGNC:18160]                                                    | -2.5817695  |
| EVC2          | EvC ciliary complex subunit 2 [Source:HGNC Symbol;Acc:HGNC:19747]                                    | -1.30770775 |
| EXO1          | exonuclease 1 [Source:HGNC Symbol;Acc:HGNC:3511]                                                     | 1.3401127   |
| EXOC3         | exocyst complex component 3 [Source:HGNC Symbol;Acc:HGNC:30378]                                      | -1.0914062  |
| EXOC3L2       | exocyst complex component 3 like 2 [Source:HGNC Symbol;Acc:HGNC:30162]                               | 1.2802544   |
| EXOC3L4       | exocyst complex component 3 like 4 [Source:HGNC Symbol;Acc:HGNC:20120]                               | -1.1522777  |
| EXOC4         | exocyst complex component 4 [Source:HGNC Symbol;Acc:HGNC:30389]                                      | -1.0870023  |
| EXOC6         | exocyst complex component 6 [Source:HGNC Symbol;Acc:HGNC:23196]                                      | 1.5559857   |
| EXOSC2        | exosome component 2 [Source:HGNC Symbol;Acc:HGNC:17097]                                              | 1.1353625   |
| EXT1          | exostosin glycosyltransferase 1 [Source:HGNC Symbol;Acc:HGNC:3512]                                   | -1.6120268  |
| EYS           | eyes shut homolog (Drosophila) [Source:HGNC Symbol;Acc:HGNC:21555]                                   | 1.12744795  |
| EZR           | ezrin [Source:HGNC Symbol;Acc:HGNC:12691]                                                            | -1.2226564  |
| F11R          | F11 receptor [Source:HGNC Symbol;Acc:HGNC:14685]                                                     | -1.3764684  |
| F13A1         | coagulation factor XIII A chain [Source:HGNC Symbol;Acc:HGNC:3531]                                   | 1.1117668   |
| F13B          | coagulation factor XIII B chain [Source:HGNC Symbol;Acc:HGNC:3534]                                   | 1.1365911   |
| F2RL1         | F2R like trypsin receptor 1 [Source:HGNC Symbol;Acc:HGNC:3538]                                       | -2.863564   |
| F3            | coagulation factor III, tissue factor [Source:HGNC Symbol;Acc:HGNC:3541]                             | -4.0262837  |
| FADS3         | fatty acid desaturase 3 [Source:HGNC Symbol;Acc:HGNC:3576]                                           | -1.3494232  |
| FAM101A       | family with sequence similarity 101 member A [Source:HGNC Symbol;Acc:HGNC:27051]                     | -2.4509072  |
| FAM102A       | family with sequence similarity 102 member A [Source:HGNC Symbol;Acc:HGNC:31419]                     | 1.271664    |
| FAM103A1      | family with sequence similarity 103 member A1 [Source:HGNC Symbol;Acc:HGNC:31022]                    | -1.1619539  |
| FAM106CP      | family with sequence similarity 106 member C, pseudogene [Source:HGNC Symbol;Acc:HGNC:38396]         | -1.0610504  |
| FAM107A       | family with sequence similarity 107 member A [Source:HGNC Symbol;Acc:HGNC:30827]                     | -1.1839452  |
| FAM107B       | family with sequence similarity 107 member B [Source:HGNC Symbol;Acc:HGNC:23726]                     | 1.260671967 |
| FAM108A1      | abhydrolase domain containing 17A                                                                    | 1.1142707   |
| FAM109A       | family with sequence similarity 109 member A [Source:HGNC Symbol;Acc:HGNC:26509]                     | 1.3533446   |
| FAM110A       | family with sequence similarity 110 member A [Source:HGNC Symbol;Acc:HGNC:16188]                     | -1.918569   |
| FAM110C       | family with sequence similarity 110 member C [Source:HGNC Symbol;Acc:HGNC:33340]                     | -1.1273499  |
| FAM114A1      | family with sequence similarity 114 member A1 [Source:HGNC Symbol;Acc:HGNC:25087]                    | -1.2067163  |
| FAM115A       | TRPM8 channel associated factor 1                                                                    | 1.3824047   |
| FAM117A       | family with sequence similarity 117 member A [Source:HGNC Symbol;Acc:HGNC:24179]                     | 1.5592538   |
| FAM117B       | family with sequence similarity 117 member B [Source:HGNC Symbol;Acc:HGNC:14440]                     | 1.3739785   |
| FAM118A       | family with sequence similarity 118 member A [Source:HGNC Symbol;Acc:HGNC:1313]                      | -1.6688662  |
| FAM118B       | family with sequence similarity 118 member B [Source:HGNC Symbol;Acc:HGNC:26110]                     | -1.3104504  |
| FAM123B       | APC membrane recruitment protein 1                                                                   | -1.0628511  |
| FAM124B       | family with sequence similarity 124 member B [Source:HGNC Symbol;Acc:HGNC:26224]                     | 1.5430545   |
| FAM125B       | multivesicular body subunit 12B                                                                      | 1.24662245  |
| FAM129A       | family with sequence similarity 129 member A [Source:HGNC Symbol;Acc:HGNC:16784]                     | -2.7730992  |
| FAM134C       | family with sequence similarity 134 member C [Source:HGNC Symbol;Acc:HGNC:27258]                     | -1.2070445  |
| FAM138D       | family with sequence similarity 138 member D [Source:HGNC Symbol;Acc:HGNC:33583]                     | 1.1140243   |
| FAM13A        | family with sequence similarity 13 member A [Source:HGNC Symbol;Acc:HGNC:19367]                      | 1.2420425   |
| FAM13AOS      | FAM13A antisense RNA 1                                                                               | 1.131773    |
| FAM150B       | family with sequence similarity 150 member B [Source:HGNC Symbol;Acc:HGNC:27683]                     | -1.448254   |
| FAM156A       | family with sequence similarity 156 member A [Source:HGNC Symbol;Acc:HGNC:30114]                     | 1.1270336   |
| FAM159A       | family with sequence similarity 159 member A [Source:HGNC Symbol;Acc:HGNC:28757]                     | -1.3886821  |
| FAM162B       | family with sequence similarity 162 member B [Source:HGNC Symbol;Acc:HGNC:21549]                     | 1.1003072   |
| FAM165B       | small integral membrane protein 11A                                                                  | -1.1030816  |
| FAM168B       | family with sequence similarity 168 member B [Source:HGNC Symbol;Acc:HGNC:27016]                     | -1.1253661  |
| FAM172BP      | family with sequence similarity 172 member B, pseudogene [Source:HGNC Symbol;Acc:HGNC:34336]         | -1.0506604  |
| FAM174B       | family with sequence similarity 174 member B [Source:HGNC Symbol;Acc:HGNC:34339]                     | 2.1517942   |
| FAM175A       | family with sequence similarity 175 member A [Source:HGNC Symbol;Acc:HGNC:25829]                     | 1.2244804   |
| FAM184A       | family with sequence similarity 184 member A [Source:HGNC Symbol;Acc:HGNC:20991]                     | -1.1058563  |
| FAM185A       | family with sequence similarity 185 member A [Source:HGNC Symbol;Acc:HGNC:22412]                     | 1.1930611   |
| FAM189A2      | family with sequence similarity 189 member A2 [Source:HGNC Symbol;Acc:HGNC:24820]                    | -1.58587025 |
| FAM189B       | family with sequence similarity 189 member B [Source:HGNC Symbol;Acc:HGNC:1233]                      | 1.0977932   |
| FAM18B2-CDRT4 | TVP23C-CDRT4 readthrough                                                                             | 1.131101    |
| FAM194A       | glutamate rich 6                                                                                     | -1.0867585  |
| FAM198A       | family with sequence similarity 198 member A [Source:HGNC Symbol;Acc:HGNC:24485]                     | 1.125563    |
| FAM19A1       | y with sequence similarity 19 member A1, C-C motif chemokine like [Source:HGNC Symbol;Acc:HGNC:2]    | 1.0895251   |
| FAM19A2       | y with sequence similarity 19 member A2, C-C motif chemokine like [Source:HGNC Symbol;Acc:HGNC:2]    | 1.1190819   |
| FAM19A4       | y with sequence similarity 19 member A4, C-C motif chemokine like [Source:HGNC Symbol;Acc:HGNC:2]    | -1.1012409  |
| FAM204A       | family with sequence similarity 204 member A [Source:HGNC Symbol;Acc:HGNC:25794]                     | -1.1335496  |
| FAM20A        | family with sequence similarity 20 member A [Source:HGNC Symbol;Acc:HGNC:23015]                      | -1.1926072  |

|         |                                                                                         |             |
|---------|-----------------------------------------------------------------------------------------|-------------|
| FAM20B  | family with sequence similarity 20 member B [Source:HGNC Symbol;Acc:HGNC:23017]         | 1.1993611   |
| FAM21C  | family with sequence similarity 21 member C [Source:HGNC Symbol;Acc:HGNC:23414]         | -1.1797668  |
| FAM22A  | NUT family member 2A                                                                    | -1.1235532  |
| FAM22D  | NUT family member 2D                                                                    | -1.1509987  |
| FAM26E  | family with sequence similarity 26 member E [Source:HGNC Symbol;Acc:HGNC:21568]         | 1.1049467   |
| FAM27A  | family with sequence similarity 27 member C                                             | 1.3954761   |
| FAM27E3 | family with sequence similarity 27 member E3 [Source:HGNC Symbol;Acc:HGNC:28655]        | 1.9286112   |
| FAM38A  | piezo type mechanosensitive ion channel component 1                                     | -1.3118521  |
| FAM38B  | piezo type mechanosensitive ion channel component 2                                     | 1.0849895   |
| FAM43A  | family with sequence similarity 43 member A [Source:HGNC Symbol;Acc:HGNC:26888]         | 1.1076658   |
| FAM43B  | family with sequence similarity 43 member B [Source:HGNC Symbol;Acc:HGNC:31791]         | 1.0879297   |
| FAM45A  | family with sequence similarity 45 member A [Source:HGNC Symbol;Acc:HGNC:31793]         | 1.25016075  |
| FAM46B  | family with sequence similarity 46 member B [Source:HGNC Symbol;Acc:HGNC:28273]         | -1.3675963  |
| FAM47A  | family with sequence similarity 47 member A [Source:HGNC Symbol;Acc:HGNC:29962]         | 1.1372169   |
| FAM48B2 | SPT20 homolog, SAGA complex component-like 2                                            | -1.0854527  |
| FAM50B  | family with sequence similarity 50 member B [Source:HGNC Symbol;Acc:HGNC:18789]         | 1.3184817   |
| FAM59A  | GRB2 associated regulator of MAPK1 subtype 1                                            | 1.0546161   |
| FAM65A  | family with sequence similarity 65 member A [Source:HGNC Symbol;Acc:HGNC:25836]         | -1.6511898  |
| FAM69A  | family with sequence similarity 69 member A [Source:HGNC Symbol;Acc:HGNC:32213]         | 1.1170827   |
| FAM69B  | family with sequence similarity 69 member B [Source:HGNC Symbol;Acc:HGNC:28290]         | 1.1853181   |
| FAM69C  | family with sequence similarity 69 member C [Source:HGNC Symbol;Acc:HGNC:31729]         | 1.1429052   |
| FAM72D  | family with sequence similarity 72 member D [Source:HGNC Symbol;Acc:HGNC:33593]         | 1.2885058   |
| FAM74A1 | family with sequence similarity 74 member A1 [Source:HGNC Symbol;Acc:HGNC:32029]        | 1.6329926   |
| FAM74A3 | family with sequence similarity 74 member A3 [Source:HGNC Symbol;Acc:HGNC:32031]        | 1.3101009   |
| FAM78A  | family with sequence similarity 78 member A [Source:HGNC Symbol;Acc:HGNC:25465]         | 1.6823552   |
| FAM82A1 | regulator of microtubule dynamics 2                                                     | 1.149435    |
| FAM82B  | regulator of microtubule dynamics 1                                                     | 1.1300373   |
| FAM84B  | family with sequence similarity 84 member B [Source:HGNC Symbol;Acc:HGNC:24166]         | -1.2021307  |
| FAM86B1 | family with sequence similarity 86 member B1 [Source:HGNC Symbol;Acc:HGNC:28268]        | 1.2195119   |
| FAN1    | FANCD2/FANCI-associated nuclease 1 [Source:HGNC Symbol;Acc:HGNC:29170]                  | 1.2757679   |
| FANCC   | Fanconi anemia complementation group C [Source:HGNC Symbol;Acc:HGNC:3584]               | -1.0678729  |
| FANCE   | Fanconi anemia complementation group E [Source:HGNC Symbol;Acc:HGNC:3586]               | 1.5591723   |
| FANCI   | Fanconi anemia complementation group I [Source:HGNC Symbol;Acc:HGNC:25568]              | 1.2206393   |
| FANCM   | Fanconi anemia complementation group M [Source:HGNC Symbol;Acc:HGNC:23168]              | 1.9093301   |
| FANK1   | fibronectin type III and ankyrin repeat domains 1 [Source:HGNC Symbol;Acc:HGNC:23527]   | 1.07005115  |
| FAP     | fibroblast activation protein alpha [Source:HGNC Symbol;Acc:HGNC:3590]                  | 1.1096455   |
| FARP1   | FERM, ARH/RhoGEF and pleckstrin domain protein 1 [Source:HGNC Symbol;Acc:HGNC:3591]     | -1.14852865 |
| FASLG   | Fas ligand [Source:HGNC Symbol;Acc:HGNC:11936]                                          | 1.0540824   |
| FASTK02 | FAST kinase domains 2 [Source:HGNC Symbol;Acc:HGNC:29160]                               | 1.2151566   |
| FASTK03 | FAST kinase domains 3 [Source:HGNC Symbol;Acc:HGNC:28758]                               | 1.1788312   |
| FASTK05 | FAST kinase domains 5 [Source:HGNC Symbol;Acc:HGNC:25790]                               | -1.3081359  |
| FAT3    | FAT atypical cadherin 3 [Source:HGNC Symbol;Acc:HGNC:23112]                             | -1.1210229  |
| FBLIM1  | filamin binding LIM protein 1 [Source:HGNC Symbol;Acc:HGNC:24686]                       | 1.2096055   |
| FBLN7   | fibulin 7 [Source:HGNC Symbol;Acc:HGNC:26740]                                           | -1.1630198  |
| FBR5    | fibrosin [Source:HGNC Symbol;Acc:HGNC:20442]                                            | -1.37614435 |
| FBXL13  | F-box and leucine rich repeat protein 13 [Source:HGNC Symbol;Acc:HGNC:21658]            | 1.1086694   |
| FBXL2   | F-box and leucine rich repeat protein 2 [Source:HGNC Symbol;Acc:HGNC:13598]             | -1.1044519  |
| FBXL4   | F-box and leucine rich repeat protein 4 [Source:HGNC Symbol;Acc:HGNC:13601]             | 1.3806888   |
| FBXL6   | F-box and leucine rich repeat protein 6 [Source:HGNC Symbol;Acc:HGNC:13603]             | -1.139332   |
| FBXO10  | F-box protein 10 [Source:HGNC Symbol;Acc:HGNC:13589]                                    | -1.3518378  |
| FBXO16  | F-box protein 16 [Source:HGNC Symbol;Acc:HGNC:13618]                                    | -1.117609   |
| FBXO28  | F-box protein 28 [Source:HGNC Symbol;Acc:HGNC:29046]                                    | 1.207461    |
| FBXO31  | F-box protein 31 [Source:HGNC Symbol;Acc:HGNC:16510]                                    | -1.0754695  |
| FBXO32  | F-box protein 32 [Source:HGNC Symbol;Acc:HGNC:16731]                                    | -1.240741   |
| FBXO44  | F-box protein 44 [Source:HGNC Symbol;Acc:HGNC:24847]                                    | 1.2248933   |
| FBXO5   | F-box protein 5 [Source:HGNC Symbol;Acc:HGNC:13584]                                     | 1.4749461   |
| FBXO7   | F-box protein 7 [Source:HGNC Symbol;Acc:HGNC:13586]                                     | -1.1708609  |
| FBXW12  | F-box and WD repeat domain containing 12 [Source:HGNC Symbol;Acc:HGNC:20729]            | -1.1190117  |
| FCAMR   | Fc fragment of IgA and IgM receptor [Source:HGNC Symbol;Acc:HGNC:24692]                 | -1.0647765  |
| FCE1R1G | Fc fragment of IgE receptor Ig [Source:HGNC Symbol;Acc:HGNC:3611]                       | -1.1729678  |
| FCGR2A  | Fc fragment of IgG receptor IIa [Source:HGNC Symbol;Acc:HGNC:3616]                      | -1.104438   |
| FCRLB   | Fc receptor like B [Source:HGNC Symbol;Acc:HGNC:26431]                                  | 1.0973054   |
| FECH    | ferrochelataase [Source:HGNC Symbol;Acc:HGNC:3647]                                      | -1.2471945  |
| FEM1B   | fem-1 homolog B [Source:HGNC Symbol;Acc:HGNC:3649]                                      | -1.305102   |
| FER1L4  | fer-1 like family member 4, pseudogene [Source:HGNC Symbol;Acc:HGNC:15801]              | -1.0951308  |
| FEZF2   | FEZ family zinc finger 2 [Source:HGNC Symbol;Acc:HGNC:13506]                            | 1.1047986   |
| FFAR2   | free fatty acid receptor 2 [Source:HGNC Symbol;Acc:HGNC:4501]                           | -1.1299802  |
| FGA     | fibrinogen alpha chain [Source:HGNC Symbol;Acc:HGNC:3661]                               | 1.0830665   |
| FGD2    | FYVE, RhoGEF and PH domain containing 2 [Source:HGNC Symbol;Acc:HGNC:3664]              | -1.0993179  |
| FGD5    | FYVE, RhoGEF and PH domain containing 5 [Source:HGNC Symbol;Acc:HGNC:19117]             | 1.1117337   |
| FGF1    | fibroblast growth factor 1 [Source:HGNC Symbol;Acc:HGNC:3665]                           | -1.1520204  |
| FGF10   | fibroblast growth factor 10 [Source:HGNC Symbol;Acc:HGNC:3666]                          | 1.0655729   |
| FGF14   | fibroblast growth factor 14 [Source:HGNC Symbol;Acc:HGNC:3671]                          | 1.0926294   |
| FGF22   | fibroblast growth factor 22 [Source:HGNC Symbol;Acc:HGNC:3679]                          | -1.1360885  |
| FGF5    | fibroblast growth factor 5 [Source:HGNC Symbol;Acc:HGNC:3683]                           | -1.1695783  |
| FGF7    | fibroblast growth factor 7 [Source:HGNC Symbol;Acc:HGNC:3685]                           | 1.2131114   |
| FGF8    | fibroblast growth factor 8 [Source:HGNC Symbol;Acc:HGNC:3686]                           | -1.1355691  |
| FGFBP2  | fibroblast growth factor binding protein 2 [Source:HGNC Symbol;Acc:HGNC:29451]          | 1.070655    |
| FGFR1   | fibroblast growth factor receptor 1 [Source:HGNC Symbol;Acc:HGNC:3688]                  | 1.18937735  |
| FGFR3   | fibroblast growth factor receptor 3 [Source:HGNC Symbol;Acc:HGNC:3690]                  | 1.1737288   |
| FGFRL1  | fibroblast growth factor receptor-like 1 [Source:HGNC Symbol;Acc:HGNC:3693]             | 1.3149416   |
| FGR     | FGR proto-oncogene, Src family tyrosine kinase [Source:HGNC Symbol;Acc:HGNC:3697]       | -1.1315042  |
| FHT     | fragile histidine triad [Source:HGNC Symbol;Acc:HGNC:3701]                              | 1.0965632   |
| FHL2    | four and a half LIM domains 2 [Source:HGNC Symbol;Acc:HGNC:3703]                        | 1.41391795  |
| FIGLA   | folliculogenesis specific bHLH transcription factor [Source:HGNC Symbol;Acc:HGNC:24669] | 1.1515675   |
| FIGLN2  | fidgetin like 2 [Source:HGNC Symbol;Acc:HGNC:13287]                                     | -1.7447519  |

|          |                                                                                                         |             |
|----------|---------------------------------------------------------------------------------------------------------|-------------|
| FILIP1L  | filamin A interacting protein 1 like [Source:HGNC Symbol;Acc:HGNC:24589]                                | -1.258265   |
| FKBP10   | FK506 binding protein 10 [Source:HGNC Symbol;Acc:HGNC:18169]                                            | 1.3032496   |
| FKBP15   | FK506 binding protein 15 [Source:HGNC Symbol;Acc:HGNC:23397]                                            | -1.2941095  |
| FKBP3    | FK506 binding protein 3 [Source:HGNC Symbol;Acc:HGNC:3719]                                              | 1.3089318   |
| FKRP     | fukutin related protein [Source:HGNC Symbol;Acc:HGNC:17997]                                             | -1.1508261  |
| FKSG2    | tumor protein, translationally-controlled 1 pseudogene 8                                                | -1.3412471  |
| FKSG83   | VN1R10P vomeronasal 1 receptor 10 pseudogene                                                            | -1.1020849  |
| FLCN     | folliculin [Source:HGNC Symbol;Acc:HGNC:27310]                                                          | -1.132727   |
| FLI1     | Fli-1 proto-oncogene, ETS transcription factor [Source:HGNC Symbol;Acc:HGNC:3749]                       | -1.6368232  |
| FLJ10489 | long intergenic non-protein coding RNA 1181                                                             | 1.0700691   |
| FLJ10661 | family with sequence similarity 86 member C1                                                            | 1.1481845   |
| FLJ12334 | long intergenic non-protein coding RNA 954                                                              | -1.146683   |
| FLJ14186 | long intergenic non-protein coding RNA 1061                                                             | 1.1104034   |
| FLJ16124 | uncharacterized LOC440867                                                                               | -1.0694792  |
| FLJ16341 | long intergenic non-protein coding RNA 1185                                                             | 1.106076    |
| FLJ16734 | uncharacterized LOC641928                                                                               | -1.068993   |
| FLJ22447 | uncharacterized LOC400221                                                                               | -1.1611881  |
| FLJ25363 | long intergenic non-protein coding RNA 1205                                                             | -1.133348   |
| FLJ27352 | chromosome 15 open reading frame 65                                                                     | 1.1378055   |
| FLJ27502 | uncharacterized LOC388406                                                                               | 1.1445552   |
| FLJ31104 | uncharacterized LOC441072                                                                               | -2.1868813  |
| FLJ31713 | uncharacterized protein FLJ31713                                                                        | -1.1838213  |
| FLJ31715 | uncharacterized FLJ31715                                                                                | -1.2119403  |
| FLJ31813 | family with sequence similarity 21 member E, pseudogene                                                 | -1.14375555 |
| FLJ39632 | double homeobox A pseudogene 9                                                                          | -1.1978531  |
| FLJ42392 | long intergenic non-protein coding RNA 548                                                              | -1.0953307  |
| FLJ42709 | NR2F1 antisense RNA 1                                                                                   | 1.136296    |
| FLNA     | filamin A [Source:HGNC Symbol;Acc:HGNC:3754]                                                            | 1.3844755   |
| FLOT1    | flotillin 1 [Source:HGNC Symbol;Acc:HGNC:3757]                                                          | 1.1725982   |
| FLT3LG   | fms related tyrosine kinase 3 ligand [Source:HGNC Symbol;Acc:HGNC:3766]                                 | -1.3767232  |
| FLVCR1   | feline leukemia virus subgroup C cellular receptor 1 [Source:HGNC Symbol;Acc:HGNC:24682]                | -1.0953585  |
| FMNL1    | formin like 1 [Source:HGNC Symbol;Acc:HGNC:1212]                                                        | -1.3301752  |
| FMNL3    | formin like 3 [Source:HGNC Symbol;Acc:HGNC:23698]                                                       | -1.65875855 |
| FMOD     | fibromodulin [Source:HGNC Symbol;Acc:HGNC:3774]                                                         | -1.0742397  |
| FMR1-AS1 | FMR1 antisense RNA 1 [Source:HGNC Symbol;Acc:HGNC:39081]                                                | -1.0894126  |
| FN1      | fibronectin 1 [Source:HGNC Symbol;Acc:HGNC:3778]                                                        | -1.2455231  |
| FNBP1    | formin binding protein 1 [Source:HGNC Symbol;Acc:HGNC:17069]                                            | -1.50575015 |
| FNBP1L   | formin binding protein 1 like [Source:HGNC Symbol;Acc:HGNC:20851]                                       | 2.0401242   |
| FNDC1    | fibronectin type III domain containing 1 [Source:HGNC Symbol;Acc:HGNC:21184]                            | -1.096427   |
| FNDC3B   | fibronectin type III domain containing 3B [Source:HGNC Symbol;Acc:HGNC:24670]                           | -1.2591299  |
| FNDC4    | fibronectin type III domain containing 4 [Source:HGNC Symbol;Acc:HGNC:20239]                            | -1.3297535  |
| FOLR3    | folate receptor 3 [Source:HGNC Symbol;Acc:HGNC:3795]                                                    | -1.0726671  |
| FOSL1    | FOS like 1, AP-1 transcription factor subunit [Source:HGNC Symbol;Acc:HGNC:13718]                       | -1.2878714  |
| FOSL2    | FOS like 2, AP-1 transcription factor subunit [Source:HGNC Symbol;Acc:HGNC:3798]                        | -1.7207865  |
| FOXA2    | forkhead box A2 [Source:HGNC Symbol;Acc:HGNC:5022]                                                      | -1.0560454  |
| FOXC1    | forkhead box C1 [Source:HGNC Symbol;Acc:HGNC:3800]                                                      | 1.5014796   |
| FOXC2    | forkhead box C2 [Source:HGNC Symbol;Acc:HGNC:3801]                                                      | -1.3353944  |
| FOXD1    | forkhead box D1 [Source:HGNC Symbol;Acc:HGNC:3802]                                                      | 1.0579338   |
| FOXE3    | forkhead box E3 [Source:HGNC Symbol;Acc:HGNC:3808]                                                      | -1.0983759  |
| FOXF1    | forkhead box F1 [Source:HGNC Symbol;Acc:HGNC:3809]                                                      | -1.7702779  |
| FOXI2    | forkhead box I2 [Source:HGNC Symbol;Acc:HGNC:32448]                                                     | -1.2707447  |
| FOXJ1    | forkhead box J1 [Source:HGNC Symbol;Acc:HGNC:3816]                                                      | -1.4464251  |
| FOXJ2    | forkhead box J2 [Source:HGNC Symbol;Acc:HGNC:24818]                                                     | 1.193658    |
| FOXK1    | forkhead box K1 [Source:HGNC Symbol;Acc:HGNC:23480]                                                     | -1.158866   |
| FOXK2    | forkhead box K2 [Source:HGNC Symbol;Acc:HGNC:6036]                                                      | -1.1412911  |
| FOXL1    | forkhead box L1 [Source:HGNC Symbol;Acc:HGNC:3817]                                                      | -1.1813451  |
| FOXL2    | forkhead box L2 [Source:HGNC Symbol;Acc:HGNC:1092]                                                      | 1.0664017   |
| FOXN2    | forkhead box N2 [Source:HGNC Symbol;Acc:HGNC:5281]                                                      | 1.4048625   |
| FOXO1    | forkhead box O1 [Source:HGNC Symbol;Acc:HGNC:3819]                                                      | -1.5311533  |
| FOXO3    | forkhead box O3 [Source:HGNC Symbol;Acc:HGNC:3821]                                                      | -1.4313021  |
| FOXO4    | forkhead box O4 [Source:HGNC Symbol;Acc:HGNC:7139]                                                      | 1.1233342   |
| FOXP1    | forkhead box P1 [Source:HGNC Symbol;Acc:HGNC:3823]                                                      | -1.2593139  |
| FRA10AC1 | site, folic acid type, rare, fra(10)(q23.3) or fra(10)(q24.2) candidate 1 [Source:HGNC Symbol;Acc:HGNC] | 1.0955932   |
| FRAS1    | Fraser extracellular matrix complex subunit 1 [Source:HGNC Symbol;Acc:HGNC:19185]                       | 1.1359186   |
| FRA1T1   | frequently rearranged in advanced T-cell lymphomas 1 [Source:HGNC Symbol;Acc:HGNC:3944]                 | 1.1383861   |
| FREM3    | FRAS1 related extracellular matrix 3 [Source:HGNC Symbol;Acc:HGNC:25172]                                | 1.2057382   |
| FRG1     | FSDH region gene 1 [Source:HGNC Symbol;Acc:HGNC:3954]                                                   | 1.2086794   |
| FRK      | fyn related Src family tyrosine kinase [Source:HGNC Symbol;Acc:HGNC:3955]                               | 1.0634891   |
| FRMD3    | FERM domain containing 3 [Source:HGNC Symbol;Acc:HGNC:24125]                                            | 2.1928285   |
| FRMD4B   | FERM domain containing 4B [Source:HGNC Symbol;Acc:HGNC:24886]                                           | 1.4652362   |
| FRMD5    | FERM domain containing 5 [Source:HGNC Symbol;Acc:HGNC:28214]                                            | 1.1846285   |
| FRMD6    | FERM domain containing 6 [Source:HGNC Symbol;Acc:HGNC:19839]                                            | -1.2973115  |
| FRMD8    | FERM domain containing 8 [Source:HGNC Symbol;Acc:HGNC:25462]                                            | -1.2110289  |
| FRMPD1   | FERM and PDZ domain containing 1 [Source:HGNC Symbol;Acc:HGNC:29159]                                    | -1.0941118  |
| FRY      | FRY microtubule binding protein [Source:HGNC Symbol;Acc:HGNC:20367]                                     | 1.457712275 |
| FSHB     | follicle stimulating hormone beta subunit [Source:HGNC Symbol;Acc:HGNC:3964]                            | 1.1080532   |
| FSHR     | follicle stimulating hormone receptor [Source:HGNC Symbol;Acc:HGNC:3969]                                | -1.0668025  |
| FST      | follicle stimulating hormone receptor [Source:HGNC Symbol;Acc:HGNC:3971]                                | 1.1812028   |
| FSTL3    | follicle stimulating hormone receptor [Source:HGNC Symbol;Acc:HGNC:3973]                                | -2.3305798  |
| FTHL17   | ferritin heavy chain like 17 [Source:HGNC Symbol;Acc:HGNC:3987]                                         | -1.1932043  |
| FTLP10   | ferritin light chain pseudogene 10 [Source:HGNC Symbol;Acc:HGNC:37959]                                  | 1.1159812   |
| FTSJ1    | FtsJ RNA methyltransferase homolog 1 (E. coli) [Source:HGNC Symbol;Acc:HGNC:13254]                      | -1.2087901  |
| FTSD2    | cap methyltransferase 1                                                                                 | -1.1590037  |
| FUCA1    | fucosidase, alpha-L-1, tissue [Source:HGNC Symbol;Acc:HGNC:4006]                                        | -1.0915387  |
| FUND2    | FUN14 domain containing 2 [Source:HGNC Symbol;Acc:HGNC:24925]                                           | -1.1151011  |
| FURIN    | furin, paired basic amino acid cleaving enzyme [Source:HGNC Symbol;Acc:HGNC:8568]                       | 1.1975517   |

|            |                                                                                                         |             |
|------------|---------------------------------------------------------------------------------------------------------|-------------|
| FUT10      | fucosyltransferase 10 [Source:HGNC Symbol;Acc:HGNC:19234]                                               | 1.1061447   |
| FUT4       | fucosyltransferase 4 [Source:HGNC Symbol;Acc:HGNC:4015]                                                 | -1.1834342  |
| FUT8       | fucosyltransferase 8 [Source:HGNC Symbol;Acc:HGNC:4019]                                                 | 1.2568308   |
| FXN        | frataxin [Source:HGNC Symbol;Acc:HGNC:3951]                                                             | -1.111749   |
| FXR1       | FMR1 autosomal homolog 1 [Source:HGNC Symbol;Acc:HGNC:4023]                                             | 1.3944286   |
| FXR2       | FMR1 autosomal homolog 2 [Source:HGNC Symbol;Acc:HGNC:4024]                                             | 1.3178192   |
| FXYD3      | FXYD domain containing ion transport regulator 3 [Source:HGNC Symbol;Acc:HGNC:4027]                     | -1.0584437  |
| FXYD6      | FXYD domain containing ion transport regulator 6 [Source:HGNC Symbol;Acc:HGNC:4030]                     | -1.2307544  |
| FYTTD1     | forty-two-three domain containing 1 [Source:HGNC Symbol;Acc:HGNC:25407]                                 | 1.2925241   |
| FZD2       | frizzled class receptor 2 [Source:HGNC Symbol;Acc:HGNC:4040]                                            | 1.298762    |
| FZD3       | frizzled class receptor 3 [Source:HGNC Symbol;Acc:HGNC:4041]                                            | 1.1348747   |
| FZD8       | frizzled class receptor 8 [Source:HGNC Symbol;Acc:HGNC:4046]                                            | 1.3511535   |
| FZR1       | fizzy/cell division cycle 20 related 1 [Source:HGNC Symbol;Acc:HGNC:24824]                              | -1.4614496  |
| G0S2       | G0/G1 switch 2 [Source:HGNC Symbol;Acc:HGNC:30229]                                                      | -2.1152213  |
| G2E3       | G2/M-phase specific E3 ubiquitin protein ligase [Source:HGNC Symbol;Acc:HGNC:20338]                     | 1.33674705  |
| G3BP2      | G3BP stress granule assembly factor 2 [Source:HGNC Symbol;Acc:HGNC:30291]                               | 1.319036    |
| G6PC3      | glucose-6-phosphatase catalytic subunit 3 [Source:HGNC Symbol;Acc:HGNC:24861]                           | 1.3342971   |
| G6PD       | glucose-6-phosphate dehydrogenase [Source:HGNC Symbol;Acc:HGNC:4057]                                    | 1.6271123   |
| GAA        | glucosidase alpha, acid [Source:HGNC Symbol;Acc:HGNC:4065]                                              | 1.1725811   |
| GABBR1     | gamma-aminobutyric acid type B receptor subunit 1 [Source:HGNC Symbol;Acc:HGNC:4070]                    | -1.23852145 |
| GABPB1     | GA binding protein transcription factor beta subunit 1 [Source:HGNC Symbol;Acc:HGNC:4074]               | -1.5324199  |
| GABRA2     | gamma-aminobutyric acid type A receptor alpha2 subunit [Source:HGNC Symbol;Acc:HGNC:4076]               | 1.1060115   |
| GABRA3     | gamma-aminobutyric acid type A receptor alpha3 subunit [Source:HGNC Symbol;Acc:HGNC:4077]               | -1.07005    |
| GABRA4     | gamma-aminobutyric acid type A receptor alpha4 subunit [Source:HGNC Symbol;Acc:HGNC:4078]               | 1.0839996   |
| GABRB1     | gamma-aminobutyric acid type A receptor beta1 subunit [Source:HGNC Symbol;Acc:HGNC:4081]                | -1.178683   |
| GABRB2     | gamma-aminobutyric acid type A receptor beta2 subunit [Source:HGNC Symbol;Acc:HGNC:4082]                | 1.1179624   |
| GABRD      | gamma-aminobutyric acid type A receptor delta subunit [Source:HGNC Symbol;Acc:HGNC:4084]                | -1.0941114  |
| GABRR1     | gamma-aminobutyric acid type A receptor rho1 subunit [Source:HGNC Symbol;Acc:HGNC:4090]                 | -1.0620341  |
| GAD2       | glutamate decarboxylase 2 [Source:HGNC Symbol;Acc:HGNC:4093]                                            | 1.1215197   |
| GADD45GIP1 | GADD45G interacting protein 1 [Source:HGNC Symbol;Acc:HGNC:29996]                                       | -1.129729   |
| GAF2       | FGF-2 activity-associated protein 2                                                                     | -1.142057   |
| GAK        | cyclin G associated kinase [Source:HGNC Symbol;Acc:HGNC:4113]                                           | -1.1412835  |
| GAL3T2     | galactose-3-O-sulfotransferase 2 [Source:HGNC Symbol;Acc:HGNC:24869]                                    | -1.0833114  |
| GALNT2     | polypeptide N-acetylgalactosaminyltransferase 2 [Source:HGNC Symbol;Acc:HGNC:4124]                      | 1.1204106   |
| GALNT6     | polypeptide N-acetylgalactosaminyltransferase 6 [Source:HGNC Symbol;Acc:HGNC:4128]                      | -1.2058042  |
| GALNTL6    | polypeptide N-acetylgalactosaminyltransferase-like 6 [Source:HGNC Symbol;Acc:HGNC:33844]                | 1.0553868   |
| GALR2      | galanin receptor 2 [Source:HGNC Symbol;Acc:HGNC:4133]                                                   | -1.1024992  |
| GANAB      | glucosidase II alpha subunit [Source:HGNC Symbol;Acc:HGNC:4138]                                         | 1.0882472   |
| GANC       | glucosidase alpha, neutral C [Source:HGNC Symbol;Acc:HGNC:4139]                                         | -1.1853673  |
| GAPVD1     | GTPase activating protein and VPS9 domains 1 [Source:HGNC Symbol;Acc:HGNC:23375]                        | 1.1831497   |
| GAS2       | growth arrest specific 2 [Source:HGNC Symbol;Acc:HGNC:4167]                                             | 1.0821108   |
| GAS2L1     | growth arrest specific 2 like 1 [Source:HGNC Symbol;Acc:HGNC:16955]                                     | 1.243758    |
| GAS2L2     | growth arrest specific 2 like 2 [Source:HGNC Symbol;Acc:HGNC:24846]                                     | 1.3586638   |
| GAS6       | growth arrest specific 6 [Source:HGNC Symbol;Acc:HGNC:4168]                                             | -1.2520485  |
| GATA2      | GATA binding protein 2 [Source:HGNC Symbol;Acc:HGNC:4171]                                               | 1.6805689   |
| GATA3      | GATA binding protein 3 [Source:HGNC Symbol;Acc:HGNC:4172]                                               | 1.3656744   |
| GATA6      | GATA binding protein 6 [Source:HGNC Symbol;Acc:HGNC:4174]                                               | -1.6315202  |
| GATS       | GATS, stromal antigen 3 opposite strand [Source:HGNC Symbol;Acc:HGNC:29954]                             | -1.1984142  |
| GATSL3     | GATS protein like 3 [Source:HGNC Symbol;Acc:HGNC:34423]                                                 | -1.6028535  |
| GBA2       | glucosylceramidase beta 2 [Source:HGNC Symbol;Acc:HGNC:18986]                                           | 1.9981656   |
| GBP1       | guanylate binding protein 1 [Source:HGNC Symbol;Acc:HGNC:4182]                                          | -1.4913276  |
| GBP2       | guanylate binding protein 2 [Source:HGNC Symbol;Acc:HGNC:4183]                                          | -1.3408135  |
| GBP4       | guanylate binding protein 4 [Source:HGNC Symbol;Acc:HGNC:20480]                                         | -1.6045449  |
| GCC1       | GRIP and coiled-coil domain containing 1 [Source:HGNC Symbol;Acc:HGNC:19095]                            | -1.1462204  |
| GCG        | glucagon [Source:HGNC Symbol;Acc:HGNC:4191]                                                             | 1.0756333   |
| GCGR       | glucagon receptor [Source:HGNC Symbol;Acc:HGNC:4192]                                                    | -1.0502907  |
| GCH1       | GTP cyclohydrolase 1 [Source:HGNC Symbol;Acc:HGNC:4193]                                                 | -1.33036155 |
| GCKR       | glucokinase regulator [Source:HGNC Symbol;Acc:HGNC:4196]                                                | -1.2296566  |
| GCLC       | glutamate-cysteine ligase catalytic subunit [Source:HGNC Symbol;Acc:HGNC:4311]                          | 1.3372725   |
| GCN11      | GCN1, eIF2 alpha kinase activator homolog                                                               | 1.1143482   |
| GCNT2      | saminyl (N-acetyl) transferase 2, I-branching enzyme (I blood group) [Source:HGNC Symbol;Acc:HGNC:4205] | -1.2319936  |
| GCNT3      | glucosaminyl (N-acetyl) transferase 3, mucin type [Source:HGNC Symbol;Acc:HGNC:4205]                    | 1.1975874   |
| GCOM1      | GRINL1A complex locus 1 [Source:HGNC Symbol;Acc:HGNC:26424]                                             | -1.5312004  |
| GCRG224    | gastric cancer-related gene GCRG224                                                                     | -1.0801486  |
| GDA        | guanine deaminase [Source:HGNC Symbol;Acc:HGNC:4212]                                                    | 1.0577004   |
| GDF6       | growth differentiation factor 6 [Source:HGNC Symbol;Acc:HGNC:4221]                                      | 1.3338702   |
| GDI1       | GDP dissociation inhibitor 1 [Source:HGNC Symbol;Acc:HGNC:4226]                                         | 1.2056956   |
| GDNF       | glial cell derived neurotrophic factor [Source:HGNC Symbol;Acc:HGNC:4232]                               | 1.09753355  |
| GEMC1      | geminin coiled-coil domain containing                                                                   | -1.0938087  |
| GEMIN6     | gem nuclear organelle associated protein 6 [Source:HGNC Symbol;Acc:HGNC:20044]                          | 1.2190032   |
| GEMIN8P4   | gem nuclear organelle associated protein 8 pseudogene 4 [Source:HGNC Symbol;Acc:HGNC:37979]             | -1.0719826  |
| GET4       | golgi to ER traffic protein 4 [Source:HGNC Symbol;Acc:HGNC:21690]                                       | -1.2364275  |
| GFM1       | G elongation factor mitochondrial 1 [Source:HGNC Symbol;Acc:HGNC:13780]                                 | 1.2284544   |
| GFOD1      | glucose-fructose oxidoreductase domain containing 1 [Source:HGNC Symbol;Acc:HGNC:21096]                 | 1.7589302   |
| GFPT2      | glutamine-fructose-6-phosphate transaminase 2 [Source:HGNC Symbol;Acc:HGNC:4242]                        | -2.2467678  |
| GFRA1      | GDNF family receptor alpha 1 [Source:HGNC Symbol;Acc:HGNC:4243]                                         | -1.20831875 |
| GFRA3      | GDNF family receptor alpha 3 [Source:HGNC Symbol;Acc:HGNC:4245]                                         | -1.1580638  |
| GGA1       | i associated, gamma adaptin ear containing, ARF binding protein 1 [Source:HGNC Symbol;Acc:HGNC:17000]   | -1.1540504  |
| GGA2       | i associated, gamma adaptin ear containing, ARF binding protein 2 [Source:HGNC Symbol;Acc:HGNC:17000]   | 1.1873485   |
| GGCT       | gamma-glutamylcyclotransferase [Source:HGNC Symbol;Acc:HGNC:21705]                                      | 1.2692438   |
| GGT3P      | gamma-glutamyltransferase 3 pseudogene [Source:HGNC Symbol;Acc:HGNC:4252]                               | -1.1473093  |
| GGT5       | gamma-glutamyltransferase 5 [Source:HGNC Symbol;Acc:HGNC:4260]                                          | 1.139714    |
| GGT7       | gamma-glutamyltransferase 7 [Source:HGNC Symbol;Acc:HGNC:4259]                                          | -1.141678   |
| GGTA1P     | glycoprotein, alpha-galactosyltransferase 1 pseudogene [Source:HGNC Symbol;Acc:HGNC:4253]               | -1.0713525  |
| GGTL2C     | gamma-glutamyltransferase light chain 2 [Source:HGNC Symbol;Acc:HGNC:18596]                             | -1.1979313  |
| GHRH       | growth hormone releasing hormone [Source:HGNC Symbol;Acc:HGNC:4265]                                     | -1.0990652  |

|          |                                                                                                  |              |
|----------|--------------------------------------------------------------------------------------------------|--------------|
| GHRLOS   | ghrelin opposite strand/antisense RNA [Source:HGNC Symbol;Acc:HGNC:33885]                        | -1.3410299   |
| GIMAP1   | GTPase, IMAP family member 1 [Source:HGNC Symbol;Acc:HGNC:23237]                                 | 1.3049476    |
| GIMAP7   | GTPase, IMAP family member 7 [Source:HGNC Symbol;Acc:HGNC:22404]                                 | 1.7194321    |
| GIN1     | gypsy retrotransposon integrase 1 [Source:HGNC Symbol;Acc:HGNC:25959]                            | 1.1487808    |
| GIPR     | gastric inhibitory polypeptide receptor [Source:HGNC Symbol;Acc:HGNC:4271]                       | -1.5035352   |
| GIT1     | GIT ArfGAP 1 [Source:HGNC Symbol;Acc:HGNC:4272]                                                  | 1.1951913    |
| GJA1     | gap junction protein alpha 1 [Source:HGNC Symbol;Acc:HGNC:4274]                                  | 1.5761799    |
| GJA8     | gap junction protein alpha 8 [Source:HGNC Symbol;Acc:HGNC:4281]                                  | -1.0595661   |
| GJA9     | gap junction protein alpha 9 [Source:HGNC Symbol;Acc:HGNC:19155]                                 | 1.2159333    |
| GJB4     | gap junction protein beta 4 [Source:HGNC Symbol;Acc:HGNC:4286]                                   | 1.0828336    |
| GJD3     | gap junction protein delta 3 [Source:HGNC Symbol;Acc:HGNC:19147]                                 | 1.1836607    |
| GKAP1    | G kinase anchoring protein 1 [Source:HGNC Symbol;Acc:HGNC:17496]                                 | 1.1877992    |
| GKN2     | gastrokine 2 [Source:HGNC Symbol;Acc:HGNC:24588]                                                 | 1.0664618    |
| GLB1L    | galactosidase beta 1 like [Source:HGNC Symbol;Acc:HGNC:28129]                                    | -1.2052326   |
| GLCE     | glucuronic acid epimerase [Source:HGNC Symbol;Acc:HGNC:17855]                                    | 1.4581761    |
| GLI1     | GLI family zinc finger 1 [Source:HGNC Symbol;Acc:HGNC:4317]                                      | -1.0931576   |
| GLI2     | GLI family zinc finger 2 [Source:HGNC Symbol;Acc:HGNC:4318]                                      | -1.1622512   |
| GLIPR1L1 | GLI pathogenesis related 1 like 1 [Source:HGNC Symbol;Acc:HGNC:28392]                            | 1.08615      |
| GLIPR2   | GLI pathogenesis related 2 [Source:HGNC Symbol;Acc:HGNC:18007]                                   | -1.1371504   |
| GLIS2    | GLIS family zinc finger 2 [Source:HGNC Symbol;Acc:HGNC:29450]                                    | -2.2590895   |
| GLD05    | glyoxalase domain containing 5 [Source:HGNC Symbol;Acc:HGNC:33358]                               | -1.0766553   |
| GLRA2    | glycine receptor alpha 2 [Source:HGNC Symbol;Acc:HGNC:4327]                                      | 1.1100254    |
| GLRB     | glycine receptor beta [Source:HGNC Symbol;Acc:HGNC:4329]                                         | 1.1112983    |
| GLT25D1  | collagen beta(1-O)galactosyltransferase 1                                                        | -1.5147244   |
| GLTP     | glycolipid transfer protein [Source:HGNC Symbol;Acc:HGNC:24867]                                  | -1.2272491   |
| GLYAT    | glycine-N-acyltransferase [Source:HGNC Symbol;Acc:HGNC:13734]                                    | -1.1158724   |
| GLYATL3  | glycine-N-acyltransferase like 3 [Source:HGNC Symbol;Acc:HGNC:21349]                             | -1.1042626   |
| GLYCAM1  | lycosylation dependent cell adhesion molecule 1 (pseudogene) [Source:HGNC Symbol;Acc:HGNC:18023] | 1.0966995    |
| GLYR1    | glyoxylate reductase 1 homolog [Source:HGNC Symbol;Acc:HGNC:24434]                               | 1.0818541    |
| GM2A     | GM2 ganglioside activator [Source:HGNC Symbol;Acc:HGNC:4367]                                     | 1.102789     |
| GMCL1    | germ cell-less, spermatogenesis associated 1 [Source:HGNC Symbol;Acc:HGNC:23843]                 | 1.209213     |
| GMDS     | GDP-mannose 4,6-dehydratase [Source:HGNC Symbol;Acc:HGNC:4369]                                   | -1.2319537   |
| GMFB     | glia maturation factor beta [Source:HGNC Symbol;Acc:HGNC:4373]                                   | 1.7714572    |
| GMFG     | glia maturation factor gamma [Source:HGNC Symbol;Acc:HGNC:4374]                                  | 1.1179016    |
| GMNN     | germinin, DNA replication inhibitor [Source:HGNC Symbol;Acc:HGNC:17493]                          | 1.3368529    |
| GMPR2    | guanosine monophosphate reductase 2 [Source:HGNC Symbol;Acc:HGNC:4377]                           | 1.091237     |
| GNA12    | G protein subunit alpha 12 [Source:HGNC Symbol;Acc:HGNC:4380]                                    | -1.1783155   |
| GNA13    | G protein subunit alpha 13 [Source:HGNC Symbol;Acc:HGNC:4381]                                    | 1.1752976    |
| GNAI1    | G protein subunit alpha i1 [Source:HGNC Symbol;Acc:HGNC:4384]                                    | 1.294164     |
| GNAT3    | G protein subunit alpha transducin 3 [Source:HGNC Symbol;Acc:HGNC:22800]                         | 1.0792123    |
| GNAZ     | G protein subunit alpha z [Source:HGNC Symbol;Acc:HGNC:4395]                                     | 1.2765317    |
| GNB3     | G protein subunit beta 3 [Source:HGNC Symbol;Acc:HGNC:4400]                                      | 1.099727     |
| GNG10    | G protein subunit gamma 10 [Source:HGNC Symbol;Acc:HGNC:4402]                                    | 1.3218697    |
| GNG13    | G protein subunit gamma 13 [Source:HGNC Symbol;Acc:HGNC:14131]                                   | -1.2102461   |
| GNGT1    | G protein subunit gamma transducin 1 [Source:HGNC Symbol;Acc:HGNC:4411]                          | 1.0531642    |
| GNGT2    | G protein subunit gamma transducin 2 [Source:HGNC Symbol;Acc:HGNC:4412]                          | -1.1883078   |
| GNL1     | G protein nucleolar 1 (putative) [Source:HGNC Symbol;Acc:HGNC:4413]                              | -1.0955336   |
| GNL3L    | G protein nucleolar 3 like [Source:HGNC Symbol;Acc:HGNC:25553]                                   | -1.2965157   |
| GNL3LP1  | G protein nucleolar 3 like pseudogene 1 [Source:HGNC Symbol;Acc:HGNC:25733]                      | -1.3284632   |
| GNPDA1   | glucosamine-6-phosphate deaminase 1 [Source:HGNC Symbol;Acc:HGNC:4417]                           | 1.178659     |
| GNPDA2   | glucosamine-6-phosphate deaminase 2 [Source:HGNC Symbol;Acc:HGNC:21526]                          | 1.2863       |
| GOLGA2   | golgin A2 [Source:HGNC Symbol;Acc:HGNC:4425]                                                     | 1.156772     |
| GOLGA6A  | golgin A6 family member A [Source:HGNC Symbol;Acc:HGNC:13567]                                    | -1.0768428   |
| GOLGA6L6 | golgin A6 family-like 6 [Source:HGNC Symbol;Acc:HGNC:37225]                                      | -1.428263733 |
| GOLGA7   | golgin A7 [Source:HGNC Symbol;Acc:HGNC:24876]                                                    | -1.1403636   |
| GOLGA8A  | golgin A8 family member A [Source:HGNC Symbol;Acc:HGNC:31972]                                    | -1.1058573   |
| GOLGA8F  | golgin A8 family member F [Source:HGNC Symbol;Acc:HGNC:32378]                                    | 1.0791911    |
| GOLPH3   | golgi phosphoprotein 3 [Source:HGNC Symbol;Acc:HGNC:15452]                                       | -1.3405111   |
| GOLPH3L  | golgi phosphoprotein 3 like [Source:HGNC Symbol;Acc:HGNC:24882]                                  | -1.5583141   |
| GORASP1  | golgi reassembly stacking protein 1 [Source:HGNC Symbol;Acc:HGNC:16769]                          | -1.2060636   |
| GORASP2  | golgi reassembly stacking protein 2 [Source:HGNC Symbol;Acc:HGNC:17500]                          | -1.2973789   |
| GOSR2    | golgi SNAP receptor complex member 2 [Source:HGNC Symbol;Acc:HGNC:4431]                          | -1.1556668   |
| GOT1     | glutamic-oxaloacetic transaminase 1 [Source:HGNC Symbol;Acc:HGNC:4432]                           | -1.0936532   |
| GP1BA    | glycoprotein Ib platelet alpha subunit [Source:HGNC Symbol;Acc:HGNC:4439]                        | -1.148358    |
| GPA33    | glycoprotein A33 [Source:HGNC Symbol;Acc:HGNC:4445]                                              | -1.0871614   |
| GPC2     | glypican 2 [Source:HGNC Symbol;Acc:HGNC:4450]                                                    | 1.283777     |
| GPC3     | glypican 3 [Source:HGNC Symbol;Acc:HGNC:4451]                                                    | -1.1009786   |
| GPC4     | glypican 4 [Source:HGNC Symbol;Acc:HGNC:4452]                                                    | -1.1483101   |
| GPC5     | glypican 5 [Source:HGNC Symbol;Acc:HGNC:4453]                                                    | 1.1147877    |
| GPHA2    | glycoprotein hormone alpha 2 [Source:HGNC Symbol;Acc:HGNC:18054]                                 | -1.15187     |
| GPHB5    | glycoprotein hormone beta 5 [Source:HGNC Symbol;Acc:HGNC:18055]                                  | -1.2113158   |
| GPI      | glucose-6-phosphate isomerase [Source:HGNC Symbol;Acc:HGNC:4458]                                 | -1.1139575   |
| GPM6A    | glycoprotein M6A [Source:HGNC Symbol;Acc:HGNC:4460]                                              | 1.0950427    |
| GPN3     | GPN-loop GTPase 3 [Source:HGNC Symbol;Acc:HGNC:30186]                                            | 1.2661116    |
| GPR101   | G protein-coupled receptor 101 [Source:HGNC Symbol;Acc:HGNC:14963]                               | 1.1341285    |
| GPR107   | G protein-coupled receptor 107 [Source:HGNC Symbol;Acc:HGNC:17830]                               | -1.2828815   |
| GPR108   | G protein-coupled receptor 108 [Source:HGNC Symbol;Acc:HGNC:17829]                               | -1.2661247   |
| GPR110   | adhesion G protein-coupled receptor F1                                                           | 1.1282552    |
| GPR116   | adhesion G protein-coupled receptor F5                                                           | 1.0807412    |
| GPR12    | G protein-coupled receptor 12 [Source:HGNC Symbol;Acc:HGNC:4466]                                 | 1.0790191    |
| GPR123   | adhesion G protein-coupled receptor A1                                                           | -1.1358241   |
| GPR126   | adhesion G protein-coupled receptor G6                                                           | 1.7564493    |
| GPR135   | G protein-coupled receptor 135 [Source:HGNC Symbol;Acc:HGNC:19991]                               | 1.3816612    |
| GPR137B  | G protein-coupled receptor 137B [Source:HGNC Symbol;Acc:HGNC:11862]                              | -1.1565648   |
| GPR148   | G protein-coupled receptor 148 [Source:HGNC Symbol;Acc:HGNC:23623]                               | 1.0794839    |
| GPR151   | G protein-coupled receptor 151 [Source:HGNC Symbol;Acc:HGNC:23624]                               | 1.0836984    |

|           |                                                                                                     |             |
|-----------|-----------------------------------------------------------------------------------------------------|-------------|
| GPR153    | G protein-coupled receptor 153 [Source:HGNC Symbol;Acc:HGNC:23618]                                  | 1.1023201   |
| GPR156    | G protein-coupled receptor 156 [Source:HGNC Symbol;Acc:HGNC:20844]                                  | -1.108239   |
| GPR161    | G protein-coupled receptor 161 [Source:HGNC Symbol;Acc:HGNC:23694]                                  | -1.1451824  |
| GPR172A   | solute carrier family 52 member 2                                                                   | -1.2120808  |
| GPR21     | G protein-coupled receptor 21 [Source:HGNC Symbol;Acc:HGNC:4476]                                    | -1.1219139  |
| GPR26     | G protein-coupled receptor 26 [Source:HGNC Symbol;Acc:HGNC:4481]                                    | 1.0973374   |
| GPR32     | G protein-coupled receptor 32 [Source:HGNC Symbol;Acc:HGNC:4487]                                    | -1.1807947  |
| GPR37L1   | G protein-coupled receptor 37 like 1 [Source:HGNC Symbol;Acc:HGNC:14923]                            | -1.4936528  |
| GPR4      | G protein-coupled receptor 4 [Source:HGNC Symbol;Acc:HGNC:4497]                                     | 1.570813    |
| GPR56     | adhesion G protein-coupled receptor G1                                                              | -1.3973953  |
| GPR68     | G protein-coupled receptor 68 [Source:HGNC Symbol;Acc:HGNC:4519]                                    | -7.8000216  |
| GPR88     | G protein-coupled receptor 88 [Source:HGNC Symbol;Acc:HGNC:4539]                                    | -1.1286671  |
| GPR97     | adhesion G protein-coupled receptor G3                                                              | -1.1021633  |
| GPRCSA    | G protein-coupled receptor class C group 5 member A [Source:HGNC Symbol;Acc:HGNC:9836]              | -1.17196    |
| GPRCSB    | G protein-coupled receptor class C group 5 member B [Source:HGNC Symbol;Acc:HGNC:13308]             | -1.5166233  |
| GPS2      | G protein pathway suppressor 2 [Source:HGNC Symbol;Acc:HGNC:4550]                                   | -1.1679187  |
| GPX2      | glutathione peroxidase 2 [Source:HGNC Symbol;Acc:HGNC:4554]                                         | -1.0988263  |
| GPX5      | glutathione peroxidase 5 [Source:HGNC Symbol;Acc:HGNC:4557]                                         | -1.1662979  |
| GPX7      | glutathione peroxidase 7 [Source:HGNC Symbol;Acc:HGNC:4559]                                         | -1.1851418  |
| GPX8      | glutathione peroxidase 8 (putative) [Source:HGNC Symbol;Acc:HGNC:33100]                             | 1.3637805   |
| GRAMD1B   | GRAM domain containing 1B [Source:HGNC Symbol;Acc:HGNC:29214]                                       | 1.1372566   |
| GRAMD3    | GRAM domain containing 3 [Source:HGNC Symbol;Acc:HGNC:24911]                                        | -1.5446496  |
| GRAP      | GRB2-related adaptor protein [Source:HGNC Symbol;Acc:HGNC:4562]                                     | 1.3193944   |
| GRASP     | eral receptor for phosphoinositides 1 associated scaffold protein [Source:HGNC Symbol;Acc:HGNC:187  | 1.2411804   |
| GRB10     | growth factor receptor bound protein 10 [Source:HGNC Symbol;Acc:HGNC:4564]                          | -1.2222267  |
| GRB14     | growth factor receptor bound protein 14 [Source:HGNC Symbol;Acc:HGNC:4565]                          | 1.2925      |
| GRB7      | growth factor receptor bound protein 7 [Source:HGNC Symbol;Acc:HGNC:4567]                           | -1.1898693  |
| GRHL1     | grainyhead like transcription factor 1 [Source:HGNC Symbol;Acc:HGNC:17923]                          | 1.2377442   |
| GRIA1     | glutamate ionotropic receptor AMPA type subunit 1 [Source:HGNC Symbol;Acc:HGNC:4571]                | 1.2061715   |
| GRIA2     | glutamate ionotropic receptor AMPA type subunit 2 [Source:HGNC Symbol;Acc:HGNC:4572]                | 1.0727841   |
| GRIA4     | glutamate ionotropic receptor AMPA type subunit 4 [Source:HGNC Symbol;Acc:HGNC:4574]                | 1.083477    |
| GRID1     | glutamate ionotropic receptor delta type subunit 1 [Source:HGNC Symbol;Acc:HGNC:4575]               | 1.1553308   |
| GRID2     | glutamate ionotropic receptor delta type subunit 2 [Source:HGNC Symbol;Acc:HGNC:4576]               | -1.1990379  |
| GRID2IP   | Grid2 interacting protein [Source:HGNC Symbol;Acc:HGNC:18464]                                       | -1.1161969  |
| GRIK1-AS1 | GRIK1 antisense RNA 1 [Source:HGNC Symbol;Acc:HGNC:16458]                                           | -1.0956793  |
| GRIK2     | glutamate ionotropic receptor kainate type subunit 2 [Source:HGNC Symbol;Acc:HGNC:4580]             | -1.1011533  |
| GRIN2B    | glutamate ionotropic receptor NMDA type subunit 2B [Source:HGNC Symbol;Acc:HGNC:4586]               | 1.1540288   |
| GRIN2C    | glutamate ionotropic receptor NMDA type subunit 2C [Source:HGNC Symbol;Acc:HGNC:4587]               | -1.2408013  |
| GRIN3B    | glutamate ionotropic receptor NMDA type subunit 3B [Source:HGNC Symbol;Acc:HGNC:16768]              | -1.119777   |
| GRINA     | amate ionotropic receptor NMDA type subunit associated protein 1 [Source:HGNC Symbol;Acc:HGNC:4:    | -1.5606254  |
| GRIP1     | glutamate receptor interacting protein 1 [Source:HGNC Symbol;Acc:HGNC:18708]                        | 1.0646765   |
| GRIP2     | glutamate receptor interacting protein 2 [Source:HGNC Symbol;Acc:HGNC:23841]                        | -1.130115   |
| GRK5      | G protein-coupled receptor kinase 5 [Source:HGNC Symbol;Acc:HGNC:4544]                              | -1.17268495 |
| GRM1      | glutamate metabotropic receptor 1 [Source:HGNC Symbol;Acc:HGNC:4593]                                | -1.1147814  |
| GRPEL2    | GrpE like 2, mitochondrial [Source:HGNC Symbol;Acc:HGNC:21060]                                      | 1.2868178   |
| GRRP1     | family with sequence similarity 110 member D                                                        | 1.8366385   |
| GSDMA     | gasdermin A [Source:HGNC Symbol;Acc:HGNC:13311]                                                     | -1.1433504  |
| GSDMC     | gasdermin C [Source:HGNC Symbol;Acc:HGNC:7151]                                                      | -1.2073267  |
| GSK3B     | glycogen synthase kinase 3 beta [Source:HGNC Symbol;Acc:HGNC:4617]                                  | -1.1495901  |
| GSTA2     | glutathione S-transferase alpha 2 [Source:HGNC Symbol;Acc:HGNC:4627]                                | -1.1239275  |
| GSTM2     | glutathione S-transferase mu 2 [Source:HGNC Symbol;Acc:HGNC:4634]                                   | 1.1127639   |
| GTCDC1    | glycosyltransferase like domain containing 1 [Source:HGNC Symbol;Acc:HGNC:20887]                    | -1.1724172  |
| GTF2H1    | general transcription factor IIH subunit 1 [Source:HGNC Symbol;Acc:HGNC:4655]                       | 1.2079952   |
| GTF2IRD2B | GTF2I repeat domain containing 2B [Source:HGNC Symbol;Acc:HGNC:33125]                               | -1.2213163  |
| GTF3C3    | general transcription factor IIIC subunit 3 [Source:HGNC Symbol;Acc:HGNC:4666]                      | 1.1797199   |
| GTF3C4    | general transcription factor IIIC subunit 4 [Source:HGNC Symbol;Acc:HGNC:4667]                      | -1.3418599  |
| GTPBP2    | GTP binding protein 2 [Source:HGNC Symbol;Acc:HGNC:4670]                                            | -1.16848465 |
| GTS1E     | G2 and S-phase expressed 1 [Source:HGNC Symbol;Acc:HGNC:13698]                                      | -1.1216478  |
| GUCY1A3   | guanylate cyclase 1 soluble subunit alpha [Source:HGNC Symbol;Acc:HGNC:4685]                        | 1.1187993   |
| GUCY1B3   | guanylate cyclase 1 soluble subunit beta [Source:HGNC Symbol;Acc:HGNC:4687]                         | 1.1112224   |
| GUSBP1    | glucuronidase, beta pseudogene 1 [Source:HGNC Symbol;Acc:HGNC:13670]                                | -1.1376362  |
| GUSBP11   | glucuronidase, beta pseudogene 11 [Source:HGNC Symbol;Acc:HGNC:42325]                               | 1.1656725   |
| GYG1      | glycogenin 1 [Source:HGNC Symbol;Acc:HGNC:4699]                                                     | -1.3225945  |
| GYPE      | glycophorin E (MNS blood group) [Source:HGNC Symbol;Acc:HGNC:4705]                                  | -1.1015376  |
| H1F0      | H1 histone family member 0 [Source:HGNC Symbol;Acc:HGNC:4714]                                       | 1.2161868   |
| H1FNT     | H1 histone family member N, testis specific [Source:HGNC Symbol;Acc:HGNC:24893]                     | -1.216024   |
| H2AFB2    | H2A histone family member B2 [Source:HGNC Symbol;Acc:HGNC:18298]                                    | -1.102913   |
| H2AFX     | H2A histone family member X [Source:HGNC Symbol;Acc:HGNC:4739]                                      | 1.213229    |
| HABP4     | hyaluronan binding protein 4 [Source:HGNC Symbol;Acc:HGNC:17062]                                    | 1.1008584   |
| HAP1      | huntingtin associated protein 1 [Source:HGNC Symbol;Acc:HGNC:4812]                                  | -1.264689   |
| HAPLN3    | hyaluronan and proteoglycan link protein 3 [Source:HGNC Symbol;Acc:HGNC:21446]                      | -1.5585191  |
| HAS1      | hyaluronan synthase 1 [Source:HGNC Symbol;Acc:HGNC:4818]                                            | -1.0814188  |
| HAS2-AS1  | HAS2 antisense RNA 1 [Source:HGNC Symbol;Acc:HGNC:34340]                                            | 1.0910698   |
| HAT1      | histone acetyltransferase 1 [Source:HGNC Symbol;Acc:HGNC:4821]                                      | 1.58188     |
| HAUS1     | HAUS augmin like complex subunit 1 [Source:HGNC Symbol;Acc:HGNC:25174]                              | 1.2777169   |
| HAUS5     | HAUS augmin like complex subunit 5 [Source:HGNC Symbol;Acc:HGNC:29130]                              | -1.068836   |
| HAUS8     | HAUS augmin like complex subunit 8 [Source:HGNC Symbol;Acc:HGNC:30532]                              | 1.1316115   |
| HBA2      | hemoglobin subunit alpha 2 [Source:HGNC Symbol;Acc:HGNC:4824]                                       | -1.2018528  |
| HBBP1     | hemoglobin subunit beta pseudogene 1 [Source:HGNC Symbol;Acc:HGNC:4828]                             | 1.127271    |
| HBD       | hemoglobin subunit delta [Source:HGNC Symbol;Acc:HGNC:4829]                                         | -1.115907   |
| HBEFG     | heparin binding EGF like growth factor [Source:HGNC Symbol;Acc:HGNC:3059]                           | -1.9606428  |
| HBS1L     | HBS1 like translational GTPase [Source:HGNC Symbol;Acc:HGNC:4834]                                   | 1.2680584   |
| HCAR1     | hydroxycarboxylic acid receptor 1 [Source:HGNC Symbol;Acc:HGNC:4532]                                | 1.0843768   |
| HCCS      | holocytochrome c synthase [Source:HGNC Symbol;Acc:HGNC:4837]                                        | -1.1365395  |
| HCN4      | rpolarization activated cyclic nucleotide gated potassium channel 4 [Source:HGNC Symbol;Acc:HGNC:1f | 1.1238633   |
| HCPS5     | HLA complex P5 (non-protein coding) [Source:HGNC Symbol;Acc:HGNC:21659]                             | -1.2405751  |

|           |                                                                                                      |              |
|-----------|------------------------------------------------------------------------------------------------------|--------------|
| HCST      | hematopoietic cell signal transducer [Source:HGNC Symbol;Acc:HGNC:16977]                             | -1.0997273   |
| HDAC3     | histone deacetylase 3 [Source:HGNC Symbol;Acc:HGNC:4854]                                             | 1.094488     |
| HDAC4     | histone deacetylase 4 [Source:HGNC Symbol;Acc:HGNC:14063]                                            | 1.1549897    |
| HDAC6     | histone deacetylase 6 [Source:HGNC Symbol;Acc:HGNC:14064]                                            | -1.1276944   |
| HDAC7     | histone deacetylase 7 [Source:HGNC Symbol;Acc:HGNC:14067]                                            | 1.1660109    |
| HDAC8     | histone deacetylase 8 [Source:HGNC Symbol;Acc:HGNC:13315]                                            | -1.1609188   |
| HDFG      | hepatoma-derived growth factor [Source:HGNC Symbol;Acc:HGNC:4856]                                    | -1.1828539   |
| HDHD2     | haloacid dehalogenase like hydrolase domain containing 2 [Source:HGNC Symbol;Acc:HGNC:25364]         | 1.3314756    |
| HDX       | highly divergent homeobox [Source:HGNC Symbol;Acc:HGNC:26411]                                        | -1.1881844   |
| HEATR1    | HEAT repeat containing 1 [Source:HGNC Symbol;Acc:HGNC:25517]                                         | 1.3483844    |
| HEATR2    | dynein axonemal assembly factor 5                                                                    | -1.124449    |
| HEATR5A   | HEAT repeat containing 5A [Source:HGNC Symbol;Acc:HGNC:20276]                                        | -1.5150114   |
| HEATR8    | maestro heat like repeat family member 7                                                             | -1.2461494   |
| HEBP1     | heme binding protein 1 [Source:HGNC Symbol;Acc:HGNC:17176]                                           | 1.1240677    |
| HERC3     | HECT and RLD domain containing E3 ubiquitin protein ligase 3 [Source:HGNC Symbol;Acc:HGNC:4876]      | 1.1079526    |
| HERC5     | HECT and RLD domain containing E3 ubiquitin protein ligase 5 [Source:HGNC Symbol;Acc:HGNC:24368]     | 1.0655811    |
| HERPUD1   | homocysteine inducible ER protein with ubiquitin like domain 1 [Source:HGNC Symbol;Acc:HGNC:13744]   | -1.1320776   |
| HES1      | hes family bHLH transcription factor 1 [Source:HGNC Symbol;Acc:HGNC:5192]                            | 1.7282095    |
| HES2      | hes family bHLH transcription factor 2 [Source:HGNC Symbol;Acc:HGNC:16005]                           | 1.2991556    |
| HES4      | hes family bHLH transcription factor 4 [Source:HGNC Symbol;Acc:HGNC:24149]                           | -1.7153193   |
| HES6      | hes family bHLH transcription factor 6 [Source:HGNC Symbol;Acc:HGNC:18254]                           | -1.2067211   |
| HEXA      | hexosaminidase subunit alpha [Source:HGNC Symbol;Acc:HGNC:4878]                                      | -1.1418691   |
| HEY1      | hes related family bHLH transcription factor with YRPW motif 1 [Source:HGNC Symbol;Acc:HGNC:4880]    | -1.7837278   |
| HEY2      | hes related family bHLH transcription factor with YRPW motif 2 [Source:HGNC Symbol;Acc:HGNC:4881]    | 1.0871742    |
| HEYF      | es related family bHLH transcription factor with YRPW motif-like [Source:HGNC Symbol;Acc:HGNC:4882]  | -1.1094779   |
| HFE       | hemochromatosis [Source:HGNC Symbol;Acc:HGNC:4886]                                                   | -1.1205891   |
| HGD       | homogentisate 1,2-dioxygenase [Source:HGNC Symbol;Acc:HGNC:4892]                                     | -1.1496454   |
| HGSNAT    | heparan-alpha-glucosaminide N-acetyltransferase [Source:HGNC Symbol;Acc:HGNC:26527]                  | -1.2157128   |
| HMAT      | hedgehog acyltransferase [Source:HGNC Symbol;Acc:HGNC:18270]                                         | 1.0805167    |
| HIBCH     | 3-hydroxyisobutyryl-CoA hydrolase [Source:HGNC Symbol;Acc:HGNC:4908]                                 | 1.226886     |
| HINT3     | histidine triad nucleotide binding protein 3 [Source:HGNC Symbol;Acc:HGNC:18468]                     | -1.469548    |
| HIP1      | huntingtin interacting protein 1 [Source:HGNC Symbol;Acc:HGNC:4913]                                  | -1.643487    |
| HIP1R     | huntingtin interacting protein 1 related [Source:HGNC Symbol;Acc:HGNC:18415]                         | 1.1324588    |
| HIPK2     | homeodomain interacting protein kinase 2 [Source:HGNC Symbol;Acc:HGNC:14402]                         | -1.280938733 |
| HIRA      | histone cell cycle regulator [Source:HGNC Symbol;Acc:HGNC:4916]                                      | 1.154029     |
| HIST2H2BF | histone cluster 2, H2bf [Source:HGNC Symbol;Acc:HGNC:24700]                                          | 1.1890186    |
| HIVEP2    | uman immunodeficiency virus type I enhancer binding protein 2 [Source:HGNC Symbol;Acc:HGNC:4921]     | -4.043127    |
| HIVEP3    | uman immunodeficiency virus type I enhancer binding protein 3 [Source:HGNC Symbol;Acc:HGNC:1356]     | -1.22298115  |
| HK1       | hexokinase 1 [Source:HGNC Symbol;Acc:HGNC:4922]                                                      | -1.2101345   |
| HKR1      | HKR1, GLI-Kruppel zinc finger family member [Source:HGNC Symbol;Acc:HGNC:4928]                       | -1.235926    |
| HLA-A     | major histocompatibility complex, class I, A [Source:HGNC Symbol;Acc:HGNC:4931]                      | -1.6363772   |
| HLA-B     | major histocompatibility complex, class I, B [Source:HGNC Symbol;Acc:HGNC:4932]                      | -1.8488251   |
| HLA-C     | major histocompatibility complex, class I, C [Source:HGNC Symbol;Acc:HGNC:4933]                      | -1.84950565  |
| HLA-DMA   | major histocompatibility complex, class II, DM alpha [Source:HGNC Symbol;Acc:HGNC:4934]              | -1.1644521   |
| HLA-DPB1  | major histocompatibility complex, class II, DP beta 1 [Source:HGNC Symbol;Acc:HGNC:4940]             | -1.1057085   |
| HLA-DQA1  | major histocompatibility complex, class II, DQ alpha 1 [Source:HGNC Symbol;Acc:HGNC:4942]            | -1.078359    |
| HLA-DQB1  | major histocompatibility complex, class II, DQ beta 1 [Source:HGNC Symbol;Acc:HGNC:4944]             | -1.0903803   |
| HLA-DRB6  | major histocompatibility complex, class II, DR beta 6 (pseudogene) [Source:HGNC Symbol;Acc:HGNC:495] | 1.2222303    |
| HLA-E     | major histocompatibility complex, class I, E [Source:HGNC Symbol;Acc:HGNC:4962]                      | -1.5749073   |
| HLA-F     | major histocompatibility complex, class I, F [Source:HGNC Symbol;Acc:HGNC:4963]                      | -1.7106955   |
| HLA-J     | major histocompatibility complex, class I, J (pseudogene) [Source:HGNC Symbol;Acc:HGNC:4967]         | -1.9360287   |
| HLA-L     | major histocompatibility complex, class I, L (pseudogene) [Source:HGNC Symbol;Acc:HGNC:4970]         | -1.1717579   |
| HM13      | histocompatibility minor 13 [Source:HGNC Symbol;Acc:HGNC:16435]                                      | -1.2656605   |
| HMBOX1    | homeobox containing 1 [Source:HGNC Symbol;Acc:HGNC:26137]                                            | -1.1849896   |
| HMBS      | hydroxymethylbilane synthase [Source:HGNC Symbol;Acc:HGNC:4982]                                      | 1.2667432    |
| HMGCL1    | 3-hydroxymethyl-3-methylglutaryl-CoA lyase like 1 [Source:HGNC Symbol;Acc:HGNC:21359]                | -1.169939    |
| HMGR      | 3-hydroxy-3-methylglutaryl-CoA reductase [Source:HGNC Symbol;Acc:HGNC:5006]                          | 1.4245794    |
| HMGCS2    | 3-hydroxy-3-methylglutaryl-CoA synthase 2 [Source:HGNC Symbol;Acc:HGNC:5008]                         | -1.0851665   |
| HMGN3     | high mobility group nucleosomal binding domain 3 [Source:HGNC Symbol;Acc:HGNC:12312]                 | 1.2397618    |
| HMOX1     | heme oxygenase 1 [Source:HGNC Symbol;Acc:HGNC:5013]                                                  | 1.2942662    |
| HMOX2     | heme oxygenase 2 [Source:HGNC Symbol;Acc:HGNC:5014]                                                  | -1.0690899   |
| HN1       | hematological and neurological expressed 1 [Source:HGNC Symbol;Acc:HGNC:14569]                       | 1.0836526    |
| HN1L      | hematological and neurological expressed 1 like [Source:HGNC Symbol;Acc:HGNC:14137]                  | -1.258135    |
| HNF4A     | hepatocyte nuclear factor 4 alpha [Source:HGNC Symbol;Acc:HGNC:5024]                                 | 1.1194208    |
| HNRNPA1   | heterogeneous nuclear ribonucleoprotein A1 [Source:HGNC Symbol;Acc:HGNC:5031]                        | 1.3027767    |
| HOMER2    | homer scaffolding protein 2 [Source:HGNC Symbol;Acc:HGNC:17513]                                      | 1.1064998    |
| HOMER3    | homer scaffolding protein 3 [Source:HGNC Symbol;Acc:HGNC:17513]                                      | 1.1064998    |
| HOMER4    | homer scaffolding protein 4 [Source:HGNC Symbol;Acc:HGNC:17513]                                      | 1.1064998    |
| HOMER5    | homer scaffolding protein 5 [Source:HGNC Symbol;Acc:HGNC:17513]                                      | 1.1064998    |
| HOMER6    | homer scaffolding protein 6 [Source:HGNC Symbol;Acc:HGNC:17513]                                      | 1.1064998    |
| HOMER7    | homer scaffolding protein 7 [Source:HGNC Symbol;Acc:HGNC:17513]                                      | 1.1064998    |
| HOMER8    | homer scaffolding protein 8 [Source:HGNC Symbol;Acc:HGNC:17513]                                      | 1.1064998    |
| HOMER9    | homer scaffolding protein 9 [Source:HGNC Symbol;Acc:HGNC:17513]                                      | 1.1064998    |
| HOMER10   | homer scaffolding protein 10 [Source:HGNC Symbol;Acc:HGNC:17513]                                     | 1.1064998    |
| HOMER11   | homer scaffolding protein 11 [Source:HGNC Symbol;Acc:HGNC:17513]                                     | 1.1064998    |
| HOMER12   | homer scaffolding protein 12 [Source:HGNC Symbol;Acc:HGNC:17513]                                     | 1.1064998    |
| HOMER13   | homer scaffolding protein 13 [Source:HGNC Symbol;Acc:HGNC:17513]                                     | 1.1064998    |
| HOMER14   | homer scaffolding protein 14 [Source:HGNC Symbol;Acc:HGNC:17513]                                     | 1.1064998    |
| HOMER15   | homer scaffolding protein 15 [Source:HGNC Symbol;Acc:HGNC:17513]                                     | 1.1064998    |
| HOMER16   | homer scaffolding protein 16 [Source:HGNC Symbol;Acc:HGNC:17513]                                     | 1.1064998    |
| HOMER17   | homer scaffolding protein 17 [Source:HGNC Symbol;Acc:HGNC:17513]                                     | 1.1064998    |
| HOMER18   | homer scaffolding protein 18 [Source:HGNC Symbol;Acc:HGNC:17513]                                     | 1.1064998    |
| HOMER19   | homer scaffolding protein 19 [Source:HGNC Symbol;Acc:HGNC:17513]                                     | 1.1064998    |
| HOMER20   | homer scaffolding protein 20 [Source:HGNC Symbol;Acc:HGNC:17513]                                     | 1.1064998    |
| HOMER21   | homer scaffolding protein 21 [Source:HGNC Symbol;Acc:HGNC:17513]                                     | 1.1064998    |
| HOMER22   | homer scaffolding protein 22 [Source:HGNC Symbol;Acc:HGNC:17513]                                     | 1.1064998    |
| HOMER23   | homer scaffolding protein 23 [Source:HGNC Symbol;Acc:HGNC:17513]                                     | 1.1064998    |
| HOMER24   | homer scaffolding protein 24 [Source:HGNC Symbol;Acc:HGNC:17513]                                     | 1.1064998    |
| HOMER25   | homer scaffolding protein 25 [Source:HGNC Symbol;Acc:HGNC:17513]                                     | 1.1064998    |
| HOMER26   | homer scaffolding protein 26 [Source:HGNC Symbol;Acc:HGNC:17513]                                     | 1.1064998    |
| HOMER27   | homer scaffolding protein 27 [Source:HGNC Symbol;Acc:HGNC:17513]                                     | 1.1064998    |
| HOMER28   | homer scaffolding protein 28 [Source:HGNC Symbol;Acc:HGNC:17513]                                     | 1.1064998    |
| HOMER29   | homer scaffolding protein 29 [Source:HGNC Symbol;Acc:HGNC:17513]                                     | 1.1064998    |
| HOMER30   | homer scaffolding protein 30 [Source:HGNC Symbol;Acc:HGNC:17513]                                     | 1.1064998    |
| HOMER31   | homer scaffolding protein 31 [Source:HGNC Symbol;Acc:HGNC:17513]                                     | 1.1064998    |
| HOMER32   | homer scaffolding protein 32 [Source:HGNC Symbol;Acc:HGNC:17513]                                     | 1.1064998    |
| HOMER33   | homer scaffolding protein 33 [Source:HGNC Symbol;Acc:HGNC:17513]                                     | 1.1064998    |
| HOMER34   | homer scaffolding protein 34 [Source:HGNC Symbol;Acc:HGNC:17513]                                     | 1.1064998    |
| HOMER35   | homer scaffolding protein 35 [Source:HGNC Symbol;Acc:HGNC:17513]                                     | 1.1064998    |
| HOMER36   | homer scaffolding protein 36 [Source:HGNC Symbol;Acc:HGNC:17513]                                     | 1.1064998    |
| HOMER37   | homer scaffolding protein 37 [Source:HGNC Symbol;Acc:HGNC:17513]                                     | 1.1064998    |
| HOMER38   | homer scaffolding protein 38 [Source:HGNC Symbol;Acc:HGNC:17513]                                     | 1.1064998    |
| HOMER39   | homer scaffolding protein 39 [Source:HGNC Symbol;Acc:HGNC:17513]                                     | 1.1064998    |
| HOMER40   | homer scaffolding protein 40 [Source:HGNC Symbol;Acc:HGNC:17513]                                     | 1.1064998    |
| HOMER41   | homer scaffolding protein 41 [Source:HGNC Symbol;Acc:HGNC:17513]                                     | 1.1064998    |
| HOMER42   | homer scaffolding protein 42 [Source:HGNC Symbol;Acc:HGNC:17513]                                     | 1.1064998    |
| HOMER43   | homer scaffolding protein 43 [Source:HGNC Symbol;Acc:HGNC:17513]                                     | 1.1064998    |
| HOMER44   | homer scaffolding protein 44 [Source:HGNC Symbol;Acc:HGNC:17513]                                     | 1.1064998    |
| HOMER45   | homer scaffolding protein 45 [Source:HGNC Symbol;Acc:HGNC:17513]                                     | 1.1064998    |
| HOMER46   | homer scaffolding protein 46 [Source:HGNC Symbol;Acc:HGNC:17513]                                     | 1.1064998    |
| HOMER47   | homer scaffolding protein 47 [Source:HGNC Symbol;Acc:HGNC:17513]                                     | 1.1064998    |
| HOMER48   | homer scaffolding protein 48 [Source:HGNC Symbol;Acc:HGNC:17513]                                     | 1.1064998    |
| HOMER49   | homer scaffolding protein 49 [Source:HGNC Symbol;Acc:HGNC:17513]                                     | 1.1064998    |
| HOMER50   | homer scaffolding protein 50 [Source:HGNC Symbol;Acc:HGNC:17513]                                     | 1.1064998    |
| HOMER51   | homer scaffolding protein 51 [Source:HGNC Symbol;Acc:HGNC:17513]                                     | 1.1064998    |
| HOMER52   | homer scaffolding protein 52 [Source:HGNC Symbol;Acc:HGNC:17513]                                     | 1.1064998    |
| HOMER53   | homer scaffolding protein 53 [Source:HGNC Symbol;Acc:HGNC:17513]                                     | 1.1064998    |
| HOMER54   | homer scaffolding protein 54 [Source:HGNC Symbol;Acc:HGNC:17513]                                     | 1.1064998    |
| HOMER55   | homer scaffolding protein 55 [Source:HGNC Symbol;Acc:HGNC:17513]                                     | 1.1064998    |
| HOMER56   | homer scaffolding protein 56 [Source:HGNC Symbol;Acc:HGNC:17513]                                     | 1.1064998    |
| HOMER57   | homer scaffolding protein 57 [Source:HGNC Symbol;Acc:HGNC:17513]                                     | 1.1064998    |
| HOMER58   | homer scaffolding protein 58 [Source:HGNC Symbol;Acc:HGNC:17513]                                     | 1.1064998    |
| HOMER59   | homer scaffolding protein 59 [Source:HGNC Symbol;Acc:HGNC:17513]                                     | 1.1064998    |
| HOMER60   | homer scaffolding protein 60 [Source:HGNC Symbol;Acc:HGNC:17513]                                     | 1.1064998    |
| HOMER61   | homer scaffolding protein 61 [Source:HGNC Symbol;Acc:HGNC:17513]                                     | 1.1064998    |
| HOMER62   | homer scaffolding protein 62 [Source:HGNC Symbol;Acc:HGNC:17513]                                     | 1.1064998    |
| HOMER63   | homer scaffolding protein 63 [Source:HGNC Symbol;Acc:HGNC:17513]                                     | 1.1064998    |
| HOMER64   | homer scaffolding protein 64 [Source:HGNC Symbol;Acc:HGNC:17513]                                     | 1.1064998    |
| HOMER65   | homer scaffolding protein 65 [Source:HGNC Symbol;Acc:HGNC:17513]                                     | 1.1064998    |
| HOMER66   | homer scaffolding protein 66 [Source:HGNC Symbol;Acc:HGNC:17513]                                     | 1.1064998    |
| HOMER67   | homer scaffolding protein 67 [Source:HGNC Symbol;Acc:HGNC:17513]                                     | 1.1064998    |
| HOMER68   | homer scaffolding protein 68 [Source:HGNC Symbol;Acc:HGNC:17513]                                     | 1.1064998    |
| HOMER69   | homer scaffolding protein 69 [Source:HGNC Symbol;Acc:HGNC:17513]                                     | 1.1064998    |
| HOMER70   | homer scaffolding protein 70 [Source:HGNC Symbol;Acc:HGNC:17513]                                     | 1.1064998    |
| HOMER71   | homer scaffolding protein 71 [Source:HGNC Symbol;Acc:HGNC:17513]                                     | 1.1064998    |
| HOMER72   | homer scaffolding protein 72 [Source:HGNC Symbol;Acc:HGNC:17513]                                     | 1.1064998    |
| HOMER73   | homer scaffolding protein 73 [Source:HGNC Symbol;Acc:HGNC:17513]                                     | 1.1064998    |
| HOMER74   | homer scaffolding protein 74 [Source:HGNC Symbol;Acc:HGNC:17513]                                     | 1.1064998    |
| HOMER75   | homer scaffolding protein 75 [Source:HGNC Symbol;Acc:HGNC:17513]                                     | 1.1064998    |
| HOMER76   | homer scaffolding protein 76 [Source:HGNC Symbol;Acc:HGNC:17513]                                     | 1.1064998    |
| HOMER77   | homer scaffolding protein 77 [Source:HGNC Symbol;Acc:HGNC:17513]                                     | 1.1064998    |
| HOMER78   | homer scaffolding protein 78 [Source:HGNC Symbol;Acc:HGNC:17513]                                     | 1.1064998    |
| HOMER79   | homer scaffolding protein 79 [Source:HGNC Symbol;Acc:HGNC:17513]                                     | 1.1064998    |
| HOMER80   | homer scaffolding protein 80 [Source:HGNC Symbol;Acc:HGNC:17513]                                     | 1.1064998    |
| HOMER81   | homer scaffolding protein 81 [Source:HGNC Symbol;Acc:HGNC:17513]                                     | 1.1064998    |
| HOMER82   | homer scaffolding protein 82 [Source:HGNC Symbol;Acc:HGNC:17513]                                     | 1.1064998    |
| HOMER83   | homer scaffolding protein 83 [Source:HGNC Symbol;Acc:HGNC:17513]                                     | 1.1064998    |
| HOMER84   | homer scaffolding protein 84 [Source:HGNC Symbol;Acc:HGNC:17513]                                     | 1.1064998    |
| HOMER85   | homer scaffolding protein 85 [Source:HGNC Symbol;Acc:HGNC:17513]                                     | 1.1064998    |
| HOMER86   | homer scaffolding protein 86 [Source:HGNC Symbol;Acc:HGNC:17513]                                     | 1.1064998    |
| HOMER87   | homer scaffolding protein 87 [Source:HGNC Symbol;Acc:HGNC:17513]                                     | 1.1064998    |
| HOMER88   | homer scaffolding protein 88 [Source:HGNC Symbol;Acc:HGNC:17513]                                     | 1.1064998    |
| HOMER89   | homer scaffolding protein 89 [Source:HGNC Symbol;Acc:HGNC:17513]                                     | 1.1064998    |
| HOMER90   | homer scaffolding protein 90 [Source:HGNC Symbol;Acc:HGNC:17513]                                     | 1.1064998    |
| HOMER91   | homer scaffolding protein 91 [Source:HGNC Symbol;Acc:HGNC:17513]                                     | 1.1064998    |
| HOMER92   | homer scaffolding protein 92 [Source:HGNC Symbol;Acc:HGNC:17513]                                     | 1.1064998    |
| HOMER93   | homer scaffolding protein 93 [Source:HGNC Symbol;Acc:HGNC:17513]                                     | 1.1064998    |
| HOMER94   | homer scaffolding protein 94 [Source:HGNC Symbol;Acc:HGNC:17513]                                     | 1.1064998    |
| HOMER95   | homer scaffolding protein 95 [Source:HGNC Symbol;Acc:HGNC:17513]                                     | 1.1064998    |
| HOMER96   | homer scaffolding protein 96 [Source:HGNC Symbol;Acc:HGNC:17513]                                     | 1.1064998    |
| HOMER97   | homer scaffolding protein 97 [Source:HGNC Symbol;Acc:HGNC:17513]                                     | 1.1064998    |
| HOMER98   | homer scaffolding protein 98 [Source:HGNC Symbol;Acc:HGNC:17513]                                     | 1.1064998    |
| HOMER99   | homer scaffolding protein 99 [Source:HGNC Symbol;Acc:HGNC:17513]                                     | 1.1064998    |
| HOMER100  | homer scaffolding protein 100 [Source:HGNC Symbol;Acc:HGNC:17513]                                    | 1.1064998    |
| HOMER101  | homer scaffolding protein 101 [Source:HGNC Symbol;Acc:HGNC:17513]                                    | 1.1064998    |
| HOMER102  | homer scaffolding protein 102 [Source:HGNC Symbol;Acc:HGNC:17513]                                    | 1.1064998    |
| HOMER103  | homer scaffolding protein 103 [Source:HGNC Symbol;Acc:HGNC:17513]                                    | 1.1064998    |
| HOMER104  | homer scaffolding protein 104 [Source:HGNC Symbol;Acc:HGNC:17513]                                    | 1.1064998    |
| HOMER105  | homer scaffolding protein 105 [Source:HGNC Symbol;Acc:HGNC:17513]                                    | 1.1064998    |
| HOMER106  | homer scaffolding protein 106 [Source:HGNC Symbol;Acc:HGNC:17513]                                    | 1.1064998    |
| HOMER107  | homer scaffolding protein 107 [Source:HGNC Symbol;Acc:HGNC:17513]                                    | 1.1064998    |
| HOMER108  | homer scaffolding protein 108 [Source:HGNC Symbol;Acc:HGNC:17513]                                    | 1.1064998    |
| HOMER109  | homer scaffolding protein 109 [Source:HGNC Symbol;Acc:HGNC:17513]                                    | 1.1064998    |
| HOMER110  | homer scaffolding protein 110 [Source:HGNC Symbol;Acc:HGNC:17513]                                    | 1.1064998    |
| HOMER111  | homer scaffolding protein 111 [Source:HGNC Symbol;Acc:HGNC:17513]                                    | 1.1064998    |
| HOMER112  | homer scaffolding protein 112 [Source:HGNC Symbol;Acc:HGNC:17513]                                    | 1.1064998    |
| HOMER113  | homer scaffolding protein 113 [Source:HGNC Symbol;Acc:HGNC:17513]                                    | 1.1064998    |
| HOMER114  | homer scaffolding protein 114 [Source:HGNC Symbol;Acc:HGNC:17513]                                    | 1.1064998    |
| HOMER115  | homer scaffolding protein 115 [Source:HGNC Symbol;Acc:HGNC:17513]                                    | 1.1064998    |
| HOMER116  | homer scaffolding protein 116 [Source:HGNC Symbol;Acc:HGNC:17513]                                    | 1.1064998    |
| HOMER117  | homer scaffolding protein 117 [Source:HGNC Symbol;Acc:HGNC:17513]                                    | 1.1064998    |
| HOMER118  | homer scaffolding protein 118 [Source:HGNC Symbol;Acc:HGNC:17513]                                    | 1.1064998    |
| HOMER119  | homer scaffolding protein 119 [Source:HGNC Symbol;Acc:HGNC:17513]                                    | 1.1064998    |
| HOMER120  | homer scaffolding protein 120 [Source:HGNC Symbol;Acc:HGNC:17513]                                    | 1.1064998    |
| HOMER121  | homer scaffolding protein 121 [Source:HGNC Symbol;Acc:HGNC:17513]                                    | 1.1064998    |
| HOMER122  | homer scaffolding protein 122 [Source:HGNC Symbol;Acc:HGNC:17513]                                    | 1.1064998    |
| HOMER123  | homer scaffolding protein 123 [Source:HGNC Symbol;Acc:HGNC:17513]                                    | 1.1064998    |
| HOMER124  | homer scaffolding protein 124 [Source:HGNC Symbol;Acc:HGNC:17513]                                    | 1.1064998    |
| HOMER125  | homer scaffolding protein 125 [Source:HGNC Symbol;Acc:HGNC:17513]                                    | 1.1064998    |
| HOMER126  | homer scaffolding protein 126 [Source:HGNC Symbol;Acc:HGNC:17513]                                    | 1.1064998    |
| HOMER127  | homer scaffolding protein 127 [Source:HGNC Symbol;Acc:HGNC:17513]                                    | 1.1064998    |
| HOMER128  | homer scaffolding protein 128 [Source:HGNC Symbol;Acc:HGNC:17513]                                    | 1.1064998    |
| HOMER129  | homer scaffolding protein 129 [Source:HGNC Symbol;Acc:HGNC:17513]                                    | 1.1064998    |
| HOMER130  | homer scaffolding protein 130 [Source:HGNC Symbol;Acc:HGNC:17513]                                    | 1.1064998    |
| HOMER131  | homer scaffolding protein 131 [Source:HGNC Symbol;Acc:HGNC:17513]                                    | 1.1064998    |
| HOMER132  | homer scaffolding protein 132 [Source:HGNC Symbol;Acc:HGNC:17513]                                    | 1.1064998    |
| HOMER133  | homer scaffolding protein 133 [Source:HGNC Symbol;Acc:HGNC:17513]                                    | 1.1064998    |
| HOMER134  | homer scaffolding protein 134 [Source:HGNC Symbol;Acc:HGNC:17513]                                    | 1.1064998    |
| HOMER135  | homer scaffolding protein 135 [Source:HGNC Symbol;Acc:HGNC:17513]                                    | 1.1064998    |
| HOMER136  | homer scaffolding protein 136 [Source:HGNC Symbol;Acc:HGNC:17513]                                    | 1.1064998    |
| HOMER137  | homer scaffolding protein 137 [Source:HGNC Symbol;Acc:HGNC:17513]                                    | 1.1064998    |
| HOMER138  | homer scaffolding protein 138 [Source:HGNC Symbol;Acc:HGNC:17513]                                    | 1.1064998    |
| HOMER139  | homer scaffolding protein 139 [Source:HGNC Symbol;Acc:HGNC:17513]                                    | 1.1064998    |
| HOMER140  | homer scaffolding protein 140 [Source:HGNC Symbol;Acc:HGNC:17513]                                    | 1.1064998    |
| HOMER141  | homer scaffolding protein 141 [Source:HGNC Symbol;Acc:HGNC:17513]                                    | 1.1064998    |
| HOMER142  | homer scaffolding protein 142 [Source:HGNC Symbol;Acc:HGNC:17513]                                    | 1.1064998    |
| HOMER143  | homer scaffolding protein 143 [Source:HGNC Symbol;Acc:HGNC:17513]                                    | 1.1064998    |
| HOMER144  | homer scaffolding protein 144 [Source:HGNC Symbol;Acc:HGNC:17513]                                    | 1.1064998    |
| HOMER145  | homer scaffolding protein 145 [Source:HGNC Symbol;Acc:HGNC:17513]                                    | 1.1064998    |
| HOMER146  | homer scaffolding protein 146 [Source:HGNC Symbol;Acc:HGNC:17513]                                    | 1.1064998    |
| HOMER147  | homer scaffolding protein 147 [Source:HGNC Symbol;Acc:HGNC:17513]                                    | 1.1064998    |
| HOMER148  | homer scaffolding protein 148 [Source:HGNC                                                           |              |

|         |                                                                                                      |              |
|---------|------------------------------------------------------------------------------------------------------|--------------|
| HRAS    | HRas proto-oncogene, GTPase [Source:HGNC Symbol;Acc:HGNC:5173]                                       | -1.1408103   |
| HRASL55 | HRAS like suppressor family member 5 [Source:HGNC Symbol;Acc:HGNC:24978]                             | -1.4020449   |
| HRCT1   | histidine rich carboxyl terminus 1 [Source:HGNC Symbol;Acc:HGNC:33872]                               | 1.9456505    |
| HRH1    | histamine receptor H1 [Source:HGNC Symbol;Acc:HGNC:5182]                                             | -1.4982616   |
| HRH3    | histamine receptor H3 [Source:HGNC Symbol;Acc:HGNC:5184]                                             | 1.0619979    |
| HS2ST1  | heparan sulfate 2-O-sulfotransferase 1 [Source:HGNC Symbol;Acc:HGNC:5193]                            | 1.3886265    |
| HS3ST1  | heparan sulfate-glucosamine 3-sulfotransferase 1 [Source:HGNC Symbol;Acc:HGNC:5194]                  | 1.4251945    |
| HS3ST5  | heparan sulfate-glucosamine 3-sulfotransferase 5 [Source:HGNC Symbol;Acc:HGNC:19419]                 | 1.13301505   |
| HS6ST1  | heparan sulfate 6-O-sulfotransferase 1 [Source:HGNC Symbol;Acc:HGNC:5201]                            | -1.2474322   |
| HS6ST3  | heparan sulfate 6-O-sulfotransferase 3 [Source:HGNC Symbol;Acc:HGNC:19134]                           | 1.1348127    |
| HSD17B2 | hydroxysteroid 17-beta dehydrogenase 2 [Source:HGNC Symbol;Acc:HGNC:5211]                            | 1.565866     |
| HSD17B4 | hydroxysteroid 17-beta dehydrogenase 4 [Source:HGNC Symbol;Acc:HGNC:5213]                            | 1.1892312    |
| HSD17B7 | hydroxysteroid 17-beta dehydrogenase 7 [Source:HGNC Symbol;Acc:HGNC:5215]                            | 1.12424025   |
| HSDL1   | hydroxysteroid dehydrogenase like 1 [Source:HGNC Symbol;Acc:HGNC:16475]                              | 1.097019     |
| HSF2    | heat shock transcription factor 2 [Source:HGNC Symbol;Acc:HGNC:5225]                                 | 1.418836     |
| HSFY1P1 | heat shock transcription factor, Y-linked 1 pseudogene 1 [Source:HGNC Symbol;Acc:HGNC:1846]          | 1.0765933    |
| HSH2D   | hematopoietic SH2 domain containing [Source:HGNC Symbol;Acc:HGNC:24920]                              | -1.1177905   |
| HSPA1A  | heat shock protein family A (Hsp70) member 1A [Source:HGNC Symbol;Acc:HGNC:5232]                     | -1.1816055   |
| HSPA2   | heat shock protein family A (Hsp70) member 2 [Source:HGNC Symbol;Acc:HGNC:5235]                      | -1.4627583   |
| HSPA4   | heat shock protein family A (Hsp70) member 4 [Source:HGNC Symbol;Acc:HGNC:5237]                      | 1.25257205   |
| HSPB7   | heat shock protein family B (small) member 7 [Source:HGNC Symbol;Acc:HGNC:5249]                      | 1.0952973    |
| HSPBAP1 | HSPB1 associated protein 1 [Source:HGNC Symbol;Acc:HGNC:16389]                                       | 1.1326001    |
| HTN1    | histatin 1 [Source:HGNC Symbol;Acc:HGNC:5283]                                                        | 1.1245089    |
| HTN3    | histatin 3 [Source:HGNC Symbol;Acc:HGNC:5284]                                                        | 1.1108384    |
| HTR1D   | 5-hydroxytryptamine receptor 1D [Source:HGNC Symbol;Acc:HGNC:5289]                                   | 1.1412073    |
| HTR1F   | 5-hydroxytryptamine receptor 1F [Source:HGNC Symbol;Acc:HGNC:5292]                                   | 1.1200968    |
| HTR2C   | 5-hydroxytryptamine receptor 2C [Source:HGNC Symbol;Acc:HGNC:5295]                                   | 1.0986276    |
| HTR3A   | 5-hydroxytryptamine receptor 3A [Source:HGNC Symbol;Acc:HGNC:5297]                                   | -1.1769689   |
| HTR4    | 5-hydroxytryptamine receptor 4 [Source:HGNC Symbol;Acc:HGNC:5299]                                    | 1.0817528    |
| HTR6    | 5-hydroxytryptamine receptor 6 [Source:HGNC Symbol;Acc:HGNC:5301]                                    | -1.1426796   |
| HTR7    | 5-hydroxytryptamine receptor 7 [Source:HGNC Symbol;Acc:HGNC:5302]                                    | 1.3485706    |
| HTR7P1  | 5-hydroxytryptamine receptor 7 pseudogene 1 [Source:HGNC Symbol;Acc:HGNC:30411]                      | 1.3741966    |
| HTRA2   | HtrA serine peptidase 2 [Source:HGNC Symbol;Acc:HGNC:14348]                                          | -1.1839318   |
| HTT     | huntingtin [Source:HGNC Symbol;Acc:HGNC:4851]                                                        | -1.1539761   |
| HULC    | hepatocellular carcinoma up-regulated long non-coding RNA [Source:HGNC Symbol;Acc:HGNC:34232]        | 1.095667     |
| HUS1B   | HUS1 checkpoint clamp component B [Source:HGNC Symbol;Acc:HGNC:16485]                                | -1.0555236   |
| HUWE1   | T, UBA and WWE domain containing 1, E3 ubiquitin protein ligase [Source:HGNC Symbol;Acc:HGNC:308]    | -1.4209539   |
| HYAL1   | hyaluronoglucosaminidase 1 [Source:HGNC Symbol;Acc:HGNC:5320]                                        | -1.1860045   |
| HYAL3   | hyaluronoglucosaminidase 3 [Source:HGNC Symbol;Acc:HGNC:5322]                                        | -1.2404289   |
| ICAM1   | intercellular adhesion molecule 1 [Source:HGNC Symbol;Acc:HGNC:5344]                                 | -54.208492   |
| ICAM4   | intercellular adhesion molecule 4 (Landsteiner-Wiener blood group) [Source:HGNC Symbol;Acc:HGNC:534] | -6.44848     |
| ICAM5   | intercellular adhesion molecule 5 [Source:HGNC Symbol;Acc:HGNC:5348]                                 | -1.2500415   |
| ICOS    | inducible T-cell costimulator [Source:HGNC Symbol;Acc:HGNC:5351]                                     | -1.1336795   |
| ICOSLG  | inducible T-cell costimulator ligand [Source:HGNC Symbol;Acc:HGNC:17087]                             | -5.4298136   |
| ICT1    | mitochondrial ribosomal protein L58                                                                  | -1.1742265   |
| ID1     | inhibitor of DNA binding 1, HLH protein [Source:HGNC Symbol;Acc:HGNC:5360]                           | 2.9173017    |
| ID2     | inhibitor of DNA binding 2, HLH protein [Source:HGNC Symbol;Acc:HGNC:5361]                           | 1.92504425   |
| IDAS    | multiciliate differentiation and DNA synthesis associated cell cycle protein                         | 1.1195458    |
| IDE     | insulin degrading enzyme [Source:HGNC Symbol;Acc:HGNC:5381]                                          | 1.2076976    |
| IDH3A   | isocitrate dehydrogenase 3 (NAD(+)) alpha [Source:HGNC Symbol;Acc:HGNC:5384]                         | 1.365312     |
| ID11    | isopentenyl-diphosphate delta isomerase 1 [Source:HGNC Symbol;Acc:HGNC:5387]                         | 1.5269727    |
| IER2    | immediate early response 2 [Source:HGNC Symbol;Acc:HGNC:28871]                                       | 1.1591237    |
| IER3    | immediate early response 3 [Source:HGNC Symbol;Acc:HGNC:5392]                                        | -1.3029556   |
| IER3IP1 | immediate early response 3 interacting protein 1 [Source:HGNC Symbol;Acc:HGNC:18550]                 | 1.3192735    |
| IER5    | immediate early response 5 [Source:HGNC Symbol;Acc:HGNC:5393]                                        | -2.3785453   |
| IER5L   | immediate early response 5 like [Source:HGNC Symbol;Acc:HGNC:23679]                                  | 1.5421685    |
| IFFO1   | intermediate filament family orphan 1 [Source:HGNC Symbol;Acc:HGNC:24970]                            | 1.3684595    |
| IFFO2   | intermediate filament family orphan 2 [Source:HGNC Symbol;Acc:HGNC:27006]                            | 1.1812522    |
| IFI16   | interferon gamma inducible protein 16 [Source:HGNC Symbol;Acc:HGNC:5395]                             | 1.450654     |
| IFI30   | IFI30, lysosomal thiol reductase [Source:HGNC Symbol;Acc:HGNC:5398]                                  | -1.8574595   |
| IFIH1   | interferon induced with helicase C domain 1 [Source:HGNC Symbol;Acc:HGNC:18873]                      | -1.9001925   |
| IFITM1  | interferon induced transmembrane protein 1 [Source:HGNC Symbol;Acc:HGNC:5412]                        | -1.1605284   |
| IFLTD1  | lamin tail domain containing 1                                                                       | 1.0886848    |
| IFNA14  | interferon alpha 14 [Source:HGNC Symbol;Acc:HGNC:5420]                                               | 1.1493437    |
| IFNAR1  | interferon alpha and beta receptor subunit 1 [Source:HGNC Symbol;Acc:HGNC:5432]                      | -1.2214895   |
| IFNAR2  | interferon alpha and beta receptor subunit 2 [Source:HGNC Symbol;Acc:HGNC:5433]                      | -1.488919833 |
| IFNG    | interferon gamma [Source:HGNC Symbol;Acc:HGNC:5438]                                                  | 1.054601     |
| IFNGR1  | interferon gamma receptor 1 [Source:HGNC Symbol;Acc:HGNC:5439]                                       | -1.8999877   |
| IFNGR2  | interferon gamma receptor 2 (interferon gamma transducer 1) [Source:HGNC Symbol;Acc:HGNC:5440]       | -2.0907316   |
| IFT122  | intraflagellar transport 122 [Source:HGNC Symbol;Acc:HGNC:13556]                                     | -1.1377552   |
| IFT20   | intraflagellar transport 20 [Source:HGNC Symbol;Acc:HGNC:30989]                                      | -1.2719423   |
| IFT74   | intraflagellar transport 74 [Source:HGNC Symbol;Acc:HGNC:21424]                                      | 1.2885128    |
| IGBP1   | immunoglobulin (CD79A) binding protein 1 [Source:HGNC Symbol;Acc:HGNC:5461]                          | -1.1667752   |
| IGF2AS  | IGF2 antisense RNA                                                                                   | -1.193187    |
| IGF2BP3 | insulin like growth factor 2 mRNA binding protein 3 [Source:HGNC Symbol;Acc:HGNC:28868]              | 1.7994442    |
| IGFBP1  | insulin like growth factor binding protein 1 [Source:HGNC Symbol;Acc:HGNC:5469]                      | 1.6492078    |
| IGFBP4  | insulin like growth factor binding protein 4 [Source:HGNC Symbol;Acc:HGNC:5473]                      | 1.2349166    |
| IGFL2   | IGF like family member 2 [Source:HGNC Symbol;Acc:HGNC:32929]                                         | -1.0987693   |
| IGFL3   | IGF like family member 3 [Source:HGNC Symbol;Acc:HGNC:32930]                                         | 1.1372129    |
| IGFN1   | immunoglobulin-like and fibronectin type III domain containing 1 [Source:HGNC Symbol;Acc:HGNC:2460]  | -1.1203761   |
| IJG     | joining chain of multimeric IgA and IgM                                                              | -1.1395674   |
| IGSF1   | immunoglobulin superfamily member 1 [Source:HGNC Symbol;Acc:HGNC:5948]                               | -1.1130397   |
| IGSF21  | immunoglobulin superfamily member 21 [Source:HGNC Symbol;Acc:HGNC:28246]                             | -1.1412876   |
| IGSF6   | immunoglobulin superfamily member 6 [Source:HGNC Symbol;Acc:HGNC:5953]                               | 1.0536579    |
| IGSF9B  | immunoglobulin superfamily member 9B [Source:HGNC Symbol;Acc:HGNC:32326]                             | -1.3680544   |
| IHH     | indian hedgehog [Source:HGNC Symbol;Acc:HGNC:5956]                                                   | 1.0591375    |

|         |                                                                                                            |              |
|---------|------------------------------------------------------------------------------------------------------------|--------------|
| IKBKAP  | a light polypeptide gene enhancer in B-cells, kinase complex-associated protein [Source:HGNC Symbol;]      | 1.1545026    |
| IKBKE   | or of kappa light polypeptide gene enhancer in B-cells, kinase epsilon [Source:HGNC Symbol;Acc:HGNC:13177] | -1.9291891   |
| IKZF2   | IKAROS family zinc finger 2 [Source:HGNC Symbol;Acc:HGNC:13177]                                            | 1.1250074    |
| IKZF3   | IKAROS family zinc finger 3 [Source:HGNC Symbol;Acc:HGNC:13178]                                            | -1.0699296   |
| IKZF4   | IKAROS family zinc finger 4 [Source:HGNC Symbol;Acc:HGNC:13179]                                            | -1.277173    |
| IL10    | interleukin 10 [Source:HGNC Symbol;Acc:HGNC:5962]                                                          | -1.0685151   |
| IL10RA  | interleukin 10 receptor subunit alpha [Source:HGNC Symbol;Acc:HGNC:5964]                                   | -1.4823235   |
| IL10RB  | interleukin 10 receptor subunit beta [Source:HGNC Symbol;Acc:HGNC:5965]                                    | -1.1694837   |
| IL11    | interleukin 11 [Source:HGNC Symbol;Acc:HGNC:5966]                                                          | 1.3062071    |
| IL12A   | interleukin 12A [Source:HGNC Symbol;Acc:HGNC:5969]                                                         | 1.119767     |
| IL13    | interleukin 13 [Source:HGNC Symbol;Acc:HGNC:5973]                                                          | 1.0838113    |
| IL13RA1 | interleukin 13 receptor subunit alpha 1 [Source:HGNC Symbol;Acc:HGNC:5974]                                 | -1.1157675   |
| IL13RA2 | interleukin 13 receptor subunit alpha 2 [Source:HGNC Symbol;Acc:HGNC:5975]                                 | 1.1172427    |
| IL15    | interleukin 15 [Source:HGNC Symbol;Acc:HGNC:5977]                                                          | -4.2042212   |
| IL15RA  | interleukin 15 receptor subunit alpha [Source:HGNC Symbol;Acc:HGNC:5978]                                   | -1.69626815  |
| IL16    | interleukin 16 [Source:HGNC Symbol;Acc:HGNC:5980]                                                          | 1.0886935    |
| IL17A   | interleukin 17A [Source:HGNC Symbol;Acc:HGNC:5981]                                                         | -1.1687678   |
| IL17RB  | interleukin 17 receptor B [Source:HGNC Symbol;Acc:HGNC:18015]                                              | 1.0950464    |
| IL17RD  | interleukin 17 receptor D [Source:HGNC Symbol;Acc:HGNC:17616]                                              | -1.1061695   |
| IL18BP  | interleukin 18 binding protein [Source:HGNC Symbol;Acc:HGNC:5987]                                          | -1.2322948   |
| IL18R1  | interleukin 18 receptor 1 [Source:HGNC Symbol;Acc:HGNC:5988]                                               | -1.543199033 |
| IL18RAP | interleukin 18 receptor accessory protein [Source:HGNC Symbol;Acc:HGNC:5989]                               | -1.32891765  |
| IL19    | interleukin 19 [Source:HGNC Symbol;Acc:HGNC:5990]                                                          | -1.1487836   |
| IL1A    | interleukin 1 alpha [Source:HGNC Symbol;Acc:HGNC:5991]                                                     | -1.6709274   |
| IL1B    | interleukin 1 beta [Source:HGNC Symbol;Acc:HGNC:5992]                                                      | -1.8520757   |
| IL1F10  | interleukin 1 family member 10 (theta) [Source:HGNC Symbol;Acc:HGNC:15552]                                 | -1.1481426   |
| IL1R2   | interleukin 1 receptor type 2 [Source:HGNC Symbol;Acc:HGNC:5994]                                           | 1.2024618    |
| IL1RL2  | interleukin 1 receptor like 2 [Source:HGNC Symbol;Acc:HGNC:5999]                                           | -1.0876387   |
| IL1RN   | interleukin 1 receptor antagonist [Source:HGNC Symbol;Acc:HGNC:6000]                                       | -1.0839552   |
| IL20    | interleukin 20 [Source:HGNC Symbol;Acc:HGNC:6002]                                                          | 1.064652     |
| IL20RA  | interleukin 20 receptor subunit alpha [Source:HGNC Symbol;Acc:HGNC:6003]                                   | 1.0829166    |
| IL20RB  | interleukin 20 receptor subunit beta [Source:HGNC Symbol;Acc:HGNC:6004]                                    | -1.3602723   |
| IL21R   | interleukin 21 receptor [Source:HGNC Symbol;Acc:HGNC:6006]                                                 | -1.1329529   |
| IL22RA2 | interleukin 22 receptor subunit alpha 2 [Source:HGNC Symbol;Acc:HGNC:14901]                                | 1.2649815    |
| IL23A   | interleukin 23 subunit alpha [Source:HGNC Symbol;Acc:HGNC:15488]                                           | -2.6102004   |
| IL27RA  | interleukin 27 receptor subunit alpha [Source:HGNC Symbol;Acc:HGNC:17290]                                  | -1.3609478   |
| IL28A   | interferon lambda 2                                                                                        | -1.1997145   |
| IL3     | interleukin 3 [Source:HGNC Symbol;Acc:HGNC:6011]                                                           | 1.0590298    |
| IL32    | interleukin 32 [Source:HGNC Symbol;Acc:HGNC:16830]                                                         | -2.7948629   |
| IL34    | interleukin 34 [Source:HGNC Symbol;Acc:HGNC:28529]                                                         | -1.2410488   |
| IL36RN  | interleukin 36 receptor antagonist [Source:HGNC Symbol;Acc:HGNC:15561]                                     | 1.1045929    |
| IL37    | interleukin 37 [Source:HGNC Symbol;Acc:HGNC:15563]                                                         | -1.2863138   |
| IL3RA   | interleukin 3 receptor subunit alpha [Source:HGNC Symbol;Acc:HGNC:6012]                                    | -2.2783055   |
| IL41    | interleukin 4 induced 1 [Source:HGNC Symbol;Acc:HGNC:19094]                                                | -6.7667794   |
| IL4R    | interleukin 4 receptor [Source:HGNC Symbol;Acc:HGNC:6015]                                                  | -1.440208767 |
| IL6     | interleukin 6 [Source:HGNC Symbol;Acc:HGNC:6018]                                                           | -1.672027    |
| IL7R    | interleukin 7 receptor [Source:HGNC Symbol;Acc:HGNC:6024]                                                  | -2.9823403   |
| IL8     | C-X-C motif chemokine ligand 8                                                                             | -8.16275255  |
| ILF2    | interleukin enhancer binding factor 2 [Source:HGNC Symbol;Acc:HGNC:6037]                                   | 1.1290766    |
| ILF3    | interleukin enhancer binding factor 3 [Source:HGNC Symbol;Acc:HGNC:6038]                                   | -1.1732329   |
| ILK     | integrin linked kinase [Source:HGNC Symbol;Acc:HGNC:6040]                                                  | -1.112325    |
| ILKAP   | ILK associated serine/threonine phosphatase [Source:HGNC Symbol;Acc:HGNC:15566]                            | -1.0899183   |
| IMMT    | inner membrane mitochondrial protein [Source:HGNC Symbol;Acc:HGNC:6047]                                    | -1.2021757   |
| IMP3    | IMP3, U3 small nucleolar ribonucleoprotein [Source:HGNC Symbol;Acc:HGNC:14497]                             | 1.1432078    |
| IMPAD1  | inositol monophosphatase domain containing 1 [Source:HGNC Symbol;Acc:HGNC:26019]                           | 1.3196304    |
| INPDH2  | inosine monophosphate dehydrogenase 2 [Source:HGNC Symbol;Acc:HGNC:6053]                                   | 1.0966448    |
| IMPG2   | interphotoreceptor matrix proteoglycan 2 [Source:HGNC Symbol;Acc:HGNC:18362]                               | -1.1148427   |
| INADL   | PATJ, crumbs cell polarity complex component                                                               | -1.338655    |
| INE1    | inactivation escape 1 (non-protein coding) [Source:HGNC Symbol;Acc:HGNC:6060]                              | -1.2958481   |
| INF2    | inverted formin, FH2 and WH2 domain containing [Source:HGNC Symbol;Acc:HGNC:23791]                         | -1.679498    |
| ING5    | inhibitor of growth family member 5 [Source:HGNC Symbol;Acc:HGNC:19421]                                    | 1.1050963    |
| INHBB   | inhibin beta B subunit [Source:HGNC Symbol;Acc:HGNC:6067]                                                  | 1.1901286    |
| INMT    | indolethylamine N-methyltransferase [Source:HGNC Symbol;Acc:HGNC:6069]                                     | -1.0938246   |
| INO80B  | INO80 complex subunit B [Source:HGNC Symbol;Acc:HGNC:13324]                                                | 1.2384149    |
| INO80D  | INO80 complex subunit D [Source:HGNC Symbol;Acc:HGNC:25997]                                                | -1.1614156   |
| INPP1   | inositol polyphosphate-1-phosphatase [Source:HGNC Symbol;Acc:HGNC:6071]                                    | 1.3880361    |
| INPP4A  | inositol polyphosphate-4-phosphatase type I A [Source:HGNC Symbol;Acc:HGNC:6074]                           | -1.1496724   |
| INPP5A  | inositol polyphosphate-5-phosphatase A [Source:HGNC Symbol;Acc:HGNC:6076]                                  | -1.24781105  |
| INPP5D  | inositol polyphosphate-5-phosphatase D [Source:HGNC Symbol;Acc:HGNC:6079]                                  | 1.3394874    |
| INPP5E  | inositol polyphosphate-5-phosphatase E [Source:HGNC Symbol;Acc:HGNC:21474]                                 | -1.1468072   |
| INPPL1  | inositol polyphosphate phosphatase like 1 [Source:HGNC Symbol;Acc:HGNC:6080]                               | 1.1466528    |
| INSIG2  | insulin induced gene 2 [Source:HGNC Symbol;Acc:HGNC:20452]                                                 | -1.1946335   |
| INSL5   | insulin like 5 [Source:HGNC Symbol;Acc:HGNC:6088]                                                          | 1.1545088    |
| INSM2   | INSM transcriptional repressor 2 [Source:HGNC Symbol;Acc:HGNC:17539]                                       | -1.1003453   |
| INTS1   | integrator complex subunit 1 [Source:HGNC Symbol;Acc:HGNC:24555]                                           | 1.1585999    |
| INTS10  | integrator complex subunit 10 [Source:HGNC Symbol;Acc:HGNC:25548]                                          | 1.2543128    |
| INTS8   | integrator complex subunit 8 [Source:HGNC Symbol;Acc:HGNC:26048]                                           | 1.2659352    |
| IPO11   | importin 11 [Source:HGNC Symbol;Acc:HGNC:20628]                                                            | 1.166967     |
| IPO7    | importin 7 [Source:HGNC Symbol;Acc:HGNC:9852]                                                              | 1.35156555   |
| IPO8    | importin 8 [Source:HGNC Symbol;Acc:HGNC:9853]                                                              | 1.3170022    |
| IPPK    | inositol-pentakisphosphate 2-kinase [Source:HGNC Symbol;Acc:HGNC:14645]                                    | -1.2809155   |
| IQCA1   | IQ motif containing with AAA domain 1 [Source:HGNC Symbol;Acc:HGNC:26195]                                  | -1.1636845   |
| IQCE    | IQ motif containing E [Source:HGNC Symbol;Acc:HGNC:29171]                                                  | 1.1891303    |
| IQCF1   | IQ motif containing F1 [Source:HGNC Symbol;Acc:HGNC:28607]                                                 | -1.1351235   |
| IQCK    | IQ motif containing K [Source:HGNC Symbol;Acc:HGNC:28556]                                                  | -1.1266048   |
| IQGAP3  | IQ motif containing GTPase activating protein 3 [Source:HGNC Symbol;Acc:HGNC:20669]                        | -1.1946466   |

|          |                                                                                                        |              |
|----------|--------------------------------------------------------------------------------------------------------|--------------|
| IQSEC1   | IQ motif and Sec7 domain 1 [Source:HGNC Symbol;Acc:HGNC:29112]                                         | 1.1182463    |
| IRAK2    | interleukin 1 receptor associated kinase 2 [Source:HGNC Symbol;Acc:HGNC:6113]                          | -6.068329    |
| IRF1     | interferon regulatory factor 1 [Source:HGNC Symbol;Acc:HGNC:6116]                                      | -4.574583    |
| IRF2     | interferon regulatory factor 2 [Source:HGNC Symbol;Acc:HGNC:6117]                                      | -1.2343482   |
| IRF3     | interferon regulatory factor 3 [Source:HGNC Symbol;Acc:HGNC:6118]                                      | 1.1684548    |
| IRF5     | interferon regulatory factor 5 [Source:HGNC Symbol;Acc:HGNC:6120]                                      | -1.6055096   |
| IRF6     | interferon regulatory factor 6 [Source:HGNC Symbol;Acc:HGNC:6121]                                      | -1.4407084   |
| IRF7     | interferon regulatory factor 7 [Source:HGNC Symbol;Acc:HGNC:6122]                                      | -1.3743957   |
| IRF9     | interferon regulatory factor 9 [Source:HGNC Symbol;Acc:HGNC:6131]                                      | -1.4288356   |
| IRS1     | insulin receptor substrate 1 [Source:HGNC Symbol;Acc:HGNC:6125]                                        | 1.1737791    |
| IRS2     | insulin receptor substrate 2 [Source:HGNC Symbol;Acc:HGNC:6126]                                        | -1.2032815   |
| ISCA1    | iron-sulfur cluster assembly 1 [Source:HGNC Symbol;Acc:HGNC:28660]                                     | -1.1577586   |
| ISCU     | iron-sulfur cluster assembly enzyme [Source:HGNC Symbol;Acc:HGNC:29882]                                | 1.1609955    |
| ISG20    | interferon stimulated exonuclease gene 20 [Source:HGNC Symbol;Acc:HGNC:6130]                           | -2.3666964   |
| ISM1     | isthmin 1, angiogenesis inhibitor [Source:HGNC Symbol;Acc:HGNC:16213]                                  | -1.0966566   |
| ITGA5    | integrin subunit alpha 5 [Source:HGNC Symbol;Acc:HGNC:6141]                                            | 1.30258      |
| ITGAL    | integrin subunit alpha L [Source:HGNC Symbol;Acc:HGNC:6148]                                            | 1.1334461    |
| ITGB1BP1 | integrin subunit beta 1 binding protein 1 [Source:HGNC Symbol;Acc:HGNC:23927]                          | 1.1433567    |
| ITGB3BP  | integrin subunit beta 3 binding protein [Source:HGNC Symbol;Acc:HGNC:6157]                             | 1.163818     |
| ITGB7    | integrin subunit beta 7 [Source:HGNC Symbol;Acc:HGNC:6162]                                             | -1.2926884   |
| ITH1     | inter-alpha-trypsin inhibitor heavy chain 1 [Source:HGNC Symbol;Acc:HGNC:6166]                         | -1.1413702   |
| ITH5     | inter-alpha-trypsin inhibitor heavy chain family member 5 [Source:HGNC Symbol;Acc:HGNC:21449]          | 1.1360995    |
| ITM2B    | integral membrane protein 2B [Source:HGNC Symbol;Acc:HGNC:6174]                                        | -1.1317462   |
| ITPKC    | inositol-trisphosphate 3-kinase C [Source:HGNC Symbol;Acc:HGNC:14897]                                  | -1.2544945   |
| IVNS1ABP | influenza virus NS1A binding protein [Source:HGNC Symbol;Acc:HGNC:16951]                               | 1.28182125   |
| IWS1     | IWS1, SUPT6H interacting protein [Source:HGNC Symbol;Acc:HGNC:25467]                                   | 1.120061     |
| JAG1     | jagged 1 [Source:HGNC Symbol;Acc:HGNC:6188]                                                            | -2.8004541   |
| JAG2     | jagged 2 [Source:HGNC Symbol;Acc:HGNC:6189]                                                            | 1.2217559    |
| JAK3     | Janus kinase 3 [Source:HGNC Symbol;Acc:HGNC:6193]                                                      | -2.9648972   |
| JAM2     | junctional adhesion molecule 2 [Source:HGNC Symbol;Acc:HGNC:14686]                                     | -2.370465267 |
| JAZF1    | JAZF zinc finger 1 [Source:HGNC Symbol;Acc:HGNC:28917]                                                 | -1.2585773   |
| JDP2     | Jun dimerization protein 2 [Source:HGNC Symbol;Acc:HGNC:17546]                                         | -1.3221147   |
| JKAMP    | JNK1/MAPK8-associated membrane protein [Source:HGNC Symbol;Acc:HGNC:20184]                             | 1.2957004    |
| JMJD6    | arginine demethylase and lysine hydroxylase [Source:HGNC Symbol;Acc:HGNC:19355]                        | -1.2402571   |
| JOSD1    | Josephin domain containing 1 [Source:HGNC Symbol;Acc:HGNC:28953]                                       | 1.0955805    |
| JPH4     | junctophilin 4 [Source:HGNC Symbol;Acc:HGNC:20156]                                                     | 1.1694688    |
| JUNB     | JunB proto-oncogene, AP-1 transcription factor subunit [Source:HGNC Symbol;Acc:HGNC:6205]              | -2.7148168   |
| KAL1     | anosmin 1                                                                                              | 1.2410437    |
| KANK2    | KN motif and ankyrin repeat domains 2 [Source:HGNC Symbol;Acc:HGNC:29300]                              | 1.3396652    |
| KANK3    | KN motif and ankyrin repeat domains 3 [Source:HGNC Symbol;Acc:HGNC:24796]                              | -1.1484523   |
| KAT2A    | lysine acetyltransferase 2A [Source:HGNC Symbol;Acc:HGNC:4201]                                         | 1.4546719    |
| KAT5     | lysine acetyltransferase 5 [Source:HGNC Symbol;Acc:HGNC:5275]                                          | -1.2389823   |
| KAT6B    | lysine acetyltransferase 6B [Source:HGNC Symbol;Acc:HGNC:17582]                                        | -1.0665951   |
| KAZALD1  | Kazal type serine peptidase inhibitor domain 1 [Source:HGNC Symbol;Acc:HGNC:25460]                     | 1.3934486    |
| KAZN     | kazrin, periplakin interacting protein [Source:HGNC Symbol;Acc:HGNC:29173]                             | -1.1227167   |
| KBTBD10  | kelch like family member 41                                                                            | 1.1044997    |
| KCNB3    | potassium voltage-gated channel subfamily D member 3 [Source:HGNC Symbol;Acc:HGNC:6239]                | 1.069064     |
| KCNB3    | potassium voltage-gated channel subfamily E regulatory subunit 3 [Source:HGNC Symbol;Acc:HGNC:6242]    | -1.1952144   |
| KCNH7    | potassium voltage-gated channel subfamily H member 7 [Source:HGNC Symbol;Acc:HGNC:18863]               | 1.0856394    |
| KCNJ12   | potassium voltage-gated channel subfamily J member 12 [Source:HGNC Symbol;Acc:HGNC:6258]               | 1.3526348    |
| KCNJ15   | potassium voltage-gated channel subfamily J member 15 [Source:HGNC Symbol;Acc:HGNC:6261]               | 1.1332278    |
| KCNK1    | potassium two pore domain channel subfamily K member 1 [Source:HGNC Symbol;Acc:HGNC:6272]              | -1.6628482   |
| KCNK4    | potassium two pore domain channel subfamily K member 4 [Source:HGNC Symbol;Acc:HGNC:6279]              | -1.1365039   |
| KCNK5    | potassium two pore domain channel subfamily K member 5 [Source:HGNC Symbol;Acc:HGNC:6280]              | -1.2193043   |
| KCNK6    | potassium two pore domain channel subfamily K member 6 [Source:HGNC Symbol;Acc:HGNC:6281]              | 1.2970812    |
| KCNK7    | potassium two pore domain channel subfamily K member 7 [Source:HGNC Symbol;Acc:HGNC:6282]              | -1.2175599   |
| KCNMB2   | ium calcium-activated channel subfamily M regulatory beta subunit 2 [Source:HGNC Symbol;Acc:HGNC:6290] | 1.1031604    |
| KCNMB4   | ium calcium-activated channel subfamily M regulatory beta subunit 4 [Source:HGNC Symbol;Acc:HGNC:6291] | 1.2300395    |
| KCNN2    | potassium calcium-activated channel subfamily N member 2 [Source:HGNC Symbol;Acc:HGNC:6291]            | -2.946887    |
| KCNQ1    | potassium voltage-gated channel subfamily Q member 1 [Source:HGNC Symbol;Acc:HGNC:6294]                | -1.1221502   |
| KCNQ2    | potassium voltage-gated channel subfamily Q member 2 [Source:HGNC Symbol;Acc:HGNC:6296]                | -1.14196305  |
| KCNS3    | potassium voltage-gated channel modifier subfamily S member 3 [Source:HGNC Symbol;Acc:HGNC:6302]       | -1.6835319   |
| KCP      | kielin/chordin-like protein [Source:HGNC Symbol;Acc:HGNC:17585]                                        | -1.1736016   |
| KCTD1    | potassium channel tetramerization domain containing 1 [Source:HGNC Symbol;Acc:HGNC:18249]              | 1.3043356    |
| KCTD11   | potassium channel tetramerization domain containing 11 [Source:HGNC Symbol;Acc:HGNC:21302]             | -1.7550062   |
| KCTD12   | potassium channel tetramerization domain containing 12 [Source:HGNC Symbol;Acc:HGNC:14678]             | 2.00215525   |
| KCTD13   | potassium channel tetramerization domain containing 13 [Source:HGNC Symbol;Acc:HGNC:22234]             | -1.1941956   |
| KCTD14   | potassium channel tetramerization domain containing 14 [Source:HGNC Symbol;Acc:HGNC:23295]             | 1.1203846    |
| KCTD15   | potassium channel tetramerization domain containing 15 [Source:HGNC Symbol;Acc:HGNC:23297]             | 1.1134436    |
| KCTD21   | potassium channel tetramerization domain containing 21 [Source:HGNC Symbol;Acc:HGNC:27452]             | -1.1448433   |
| KCTD3    | potassium channel tetramerization domain containing 3 [Source:HGNC Symbol;Acc:HGNC:21305]              | 1.2762947    |
| KCTD5    | potassium channel tetramerization domain containing 5 [Source:HGNC Symbol;Acc:HGNC:21423]              | -1.1867813   |
| KDEL1    | KDEL motif containing 1 [Source:HGNC Symbol;Acc:HGNC:19350]                                            | -1.2030149   |
| KDELRC3  | KDEL endoplasmic reticulum protein retention receptor 3 [Source:HGNC Symbol;Acc:HGNC:6306]             | -1.3354626   |
| KDM1B    | lysine demethylase 1B [Source:HGNC Symbol;Acc:HGNC:21577]                                              | -1.0974213   |
| KDM2A    | lysine demethylase 2A [Source:HGNC Symbol;Acc:HGNC:13606]                                              | -1.5063708   |
| KDM3A    | lysine demethylase 3A [Source:HGNC Symbol;Acc:HGNC:20815]                                              | 1.2498034    |
| KDM4A    | lysine demethylase 4A [Source:HGNC Symbol;Acc:HGNC:22978]                                              | -1.1761543   |
| KDM4D    | lysine demethylase 4D [Source:HGNC Symbol;Acc:HGNC:25498]                                              | -1.2728119   |
| KDM6B    | lysine demethylase 6B [Source:HGNC Symbol;Acc:HGNC:29012]                                              | -1.2253329   |
| KDSR     | 3-ketodihydrosphingosine reductase [Source:HGNC Symbol;Acc:HGNC:4021]                                  | 1.1298662    |
| KEL      | Kell blood group, metallo-endopeptidase [Source:HGNC Symbol;Acc:HGNC:6308]                             | 1.1421485    |
| KHSRP    | KH-type splicing regulatory protein [Source:HGNC Symbol;Acc:HGNC:6316]                                 | 1.2597895    |
| KIAA0090 | ER membrane protein complex subunit 1                                                                  | 1.0713794    |
| KIAA0174 | IST1, ESCRT-III associated factor                                                                      | -1.2136495   |
| KIAA0196 | KIAA0196 [Source:HGNC Symbol;Acc:HGNC:28984]                                                           | 1.2771231    |

|            |                                                                                |             |
|------------|--------------------------------------------------------------------------------|-------------|
| KIAA0247   | sushi domain containing 6                                                      | -1.3338534  |
| KIAA0284   | centrosomal protein 170B                                                       | 1.1373115   |
| KIAA0317   | apoptosis resistant E3 ubiquitin protein ligase 1                              | -1.2232885  |
| KIAA0391   | KIAA0391 [Source:HGNC Symbol;Acc:HGNC:19958]                                   | -1.1419615  |
| KIAA0415   | adaptor related protein complex 5 zeta 1 subunit                               | -1.4796715  |
| KIAA0528   | C2 calcium dependent domain containing 5                                       | 1.4897679   |
| KIAA0664L3 | clustered mitochondria homolog pseudogene 3                                    | -1.2562492  |
| KIAA0753   | KIAA0753 [Source:HGNC Symbol;Acc:HGNC:29110]                                   | 1.2224723   |
| KIAA0907   | KIAA0907 [Source:HGNC Symbol;Acc:HGNC:29145]                                   | -1.1477985  |
| KIAA1147   | KIAA1147 [Source:HGNC Symbol;Acc:HGNC:29472]                                   | -1.31527265 |
| KIAA1191   | KIAA1191 [Source:HGNC Symbol;Acc:HGNC:29209]                                   | -1.1766967  |
| KIAA1217   | KIAA1217 [Source:HGNC Symbol;Acc:HGNC:25428]                                   | -1.21932455 |
| KIAA1239   | NACHT and WD repeat domain containing 2                                        | 1.1688716   |
| KIAA1310   | KAT8 regulatory NSL complex subunit 3                                          | -1.2986103  |
| KIAA1429   | KIAA1429 [Source:HGNC Symbol;Acc:HGNC:24500]                                   | 1.3513559   |
| KIAA1430   | cilia and flagella associated protein 97                                       | 1.498723    |
| KIAA1432   | RIC1 homolog, RAB6A GEF complex partner 1                                      | 1.2558789   |
| KIAA1467   | family with sequence similarity 234 member B                                   | 1.2544901   |
| KIAA1522   | KIAA1522 [Source:HGNC Symbol;Acc:HGNC:29301]                                   | -1.3404709  |
| KIAA1539   | family with sequence similarity 214 member B                                   | 1.3029575   |
| KIAA1609   | TBC/LysM-associated domain containing 1                                        | -1.70323875 |
| KIAA1644   | KIAA1644 [Source:HGNC Symbol;Acc:HGNC:29335]                                   | -1.2054121  |
| KIAA1656   | KIAA1656 protein                                                               | 1.1104379   |
| KIAA1671   | KIAA1671 [Source:HGNC Symbol;Acc:HGNC:29345]                                   | -1.108342   |
| KIAA1683   | KIAA1683 [Source:HGNC Symbol;Acc:HGNC:29350]                                   | -1.1410635  |
| KIAA1715   | lunapark, ER junction formation factor                                         | 1.1323284   |
| KIAA1804   | mitogen-activated protein kinase kinase kinase 21                              | -1.2970525  |
| KIAA1949   | protein phosphatase 1 regulatory subunit 18                                    | -1.3295424  |
| KIF13A     | kinesin family member 13A [Source:HGNC Symbol;Acc:HGNC:14566]                  | -1.3354458  |
| KIF17      | kinesin family member 17 [Source:HGNC Symbol;Acc:HGNC:19167]                   | -1.142011   |
| KIF19      | kinesin family member 19 [Source:HGNC Symbol;Acc:HGNC:26735]                   | 1.2089506   |
| KIF1B      | kinesin family member 1B [Source:HGNC Symbol;Acc:HGNC:16636]                   | -1.0699205  |
| KIF21A     | kinesin family member 21A [Source:HGNC Symbol;Acc:HGNC:19349]                  | 1.0866286   |
| KIF21B     | kinesin family member 21B [Source:HGNC Symbol;Acc:HGNC:29442]                  | -1.3706878  |
| KIF26A     | kinesin family member 26A [Source:HGNC Symbol;Acc:HGNC:20226]                  | -1.393289   |
| KIF2A      | kinesin family member 2A [Source:HGNC Symbol;Acc:HGNC:6318]                    | 1.2320776   |
| KIF6       | kinesin family member 6 [Source:HGNC Symbol;Acc:HGNC:21202]                    | 1.1285      |
| KIFC2      | kinesin family member C2 [Source:HGNC Symbol;Acc:HGNC:29530]                   | 1.0632762   |
| KIRREL2    | kin of IRRE like 2 (Drosophila) [Source:HGNC Symbol;Acc:HGNC:18816]            | -1.1878211  |
| KIRREL3    | kin of IRRE like 3 (Drosophila) [Source:HGNC Symbol;Acc:HGNC:23204]            | -1.0816516  |
| KIT        | KIT proto-oncogene receptor tyrosine kinase [Source:HGNC Symbol;Acc:HGNC:6342] | 1.149086    |
| KLC1       | kinesin light chain 1 [Source:HGNC Symbol;Acc:HGNC:6387]                       | -1.211962   |
| KLC2       | kinesin light chain 2 [Source:HGNC Symbol;Acc:HGNC:20716]                      | 1.1763554   |
| KLF11      | Kruppel like factor 11 [Source:HGNC Symbol;Acc:HGNC:11811]                     | -1.2972825  |
| KLF13      | Kruppel like factor 13 [Source:HGNC Symbol;Acc:HGNC:13672]                     | 1.053679    |
| KLF15      | Kruppel like factor 15 [Source:HGNC Symbol;Acc:HGNC:14536]                     | -1.168275   |
| KLF2       | Kruppel like factor 2 [Source:HGNC Symbol;Acc:HGNC:6347]                       | 1.8338419   |
| KLF3       | Kruppel like factor 3 [Source:HGNC Symbol;Acc:HGNC:16516]                      | -1.3434803  |
| KLF6       | Kruppel like factor 6 [Source:HGNC Symbol;Acc:HGNC:2235]                       | -1.1862088  |
| KLF7       | Kruppel like factor 7 [Source:HGNC Symbol;Acc:HGNC:6350]                       | -1.7217264  |
| KLHDC10    | kelch domain containing 10 [Source:HGNC Symbol;Acc:HGNC:22194]                 | 1.16742     |
| KLHDC3     | kelch domain containing 3 [Source:HGNC Symbol;Acc:HGNC:20704]                  | 1.3041364   |
| KLHDC4     | kelch domain containing 4 [Source:HGNC Symbol;Acc:HGNC:25272]                  | -1.2552928  |
| KLHDC8A    | kelch domain containing 8A [Source:HGNC Symbol;Acc:HGNC:25573]                 | -1.1591922  |
| KLHL21     | kelch like family member 21 [Source:HGNC Symbol;Acc:HGNC:29041]                | -1.3415769  |
| KLHL22     | kelch like family member 22 [Source:HGNC Symbol;Acc:HGNC:25888]                | -1.0968361  |
| KLHL29     | kelch like family member 29 [Source:HGNC Symbol;Acc:HGNC:29404]                | 1.124055    |
| KLHL3      | kelch like family member 3 [Source:HGNC Symbol;Acc:HGNC:6354]                  | 1.705701    |
| KLHL33     | kelch like family member 33 [Source:HGNC Symbol;Acc:HGNC:31952]                | -1.1775262  |
| KLHL35     | kelch like family member 35 [Source:HGNC Symbol;Acc:HGNC:26597]                | 1.3110178   |
| KLHL36     | kelch like family member 36 [Source:HGNC Symbol;Acc:HGNC:17844]                | -0.0765585  |
| KLHL5      | kelch like family member 5 [Source:HGNC Symbol;Acc:HGNC:6356]                  | -1.2760949  |
| KLHL6      | kelch like family member 6 [Source:HGNC Symbol;Acc:HGNC:18653]                 | 1.34621075  |
| KLHL7      | kelch like family member 7 [Source:HGNC Symbol;Acc:HGNC:15646]                 | -1.2467619  |
| KLK14      | kallikrein related peptidase 14 [Source:HGNC Symbol;Acc:HGNC:6362]             | 1.111934    |
| KLK2       | kallikrein related peptidase 2 [Source:HGNC Symbol;Acc:HGNC:6363]              | -1.2017409  |
| KLK3       | kallikrein related peptidase 3 [Source:HGNC Symbol;Acc:HGNC:6364]              | -1.1380554  |
| KLK7       | kallikrein related peptidase 7 [Source:HGNC Symbol;Acc:HGNC:6368]              | 1.0780284   |
| KLK9       | kallikrein related peptidase 9 [Source:HGNC Symbol;Acc:HGNC:6370]              | -1.1499418  |
| KLRD1      | killer cell lectin like receptor D1 [Source:HGNC Symbol;Acc:HGNC:6378]         | 1.118779    |
| KLRF1      | killer cell lectin like receptor F1 [Source:HGNC Symbol;Acc:HGNC:13342]        | 1.1372107   |
| KPNA3      | karyopherin subunit alpha 3 [Source:HGNC Symbol;Acc:HGNC:6396]                 | 1.4870386   |
| KPNA5      | karyopherin subunit alpha 5 [Source:HGNC Symbol;Acc:HGNC:6398]                 | 1.20115465  |
| KREMEN1    | kringle containing transmembrane protein 1 [Source:HGNC Symbol;Acc:HGNC:17550] | -1.31337725 |
| KRT12      | keratin 12 [Source:HGNC Symbol;Acc:HGNC:6414]                                  | 1.0628365   |
| KRT16      | keratin 16 [Source:HGNC Symbol;Acc:HGNC:6423]                                  | 1.0984526   |
| KRT18      | keratin 18 [Source:HGNC Symbol;Acc:HGNC:6430]                                  | 1.1631695   |
| KRT18P55   | keratin 18 pseudogene 55 [Source:HGNC Symbol;Acc:HGNC:26874]                   | 1.2552879   |
| KRT19      | keratin 19 [Source:HGNC Symbol;Acc:HGNC:6436]                                  | 1.343165    |
| KRT20      | keratin 20 [Source:HGNC Symbol;Acc:HGNC:20412]                                 | 1.0814995   |
| KRT32      | keratin 32 [Source:HGNC Symbol;Acc:HGNC:6449]                                  | -1.214745   |
| KRT7       | keratin 7 [Source:HGNC Symbol;Acc:HGNC:6445]                                   | 1.1977432   |
| KRT74      | keratin 74 [Source:HGNC Symbol;Acc:HGNC:28929]                                 | -1.1463302  |
| KRT79      | keratin 79 [Source:HGNC Symbol;Acc:HGNC:28930]                                 | 1.1214811   |
| KRT80      | keratin 80 [Source:HGNC Symbol;Acc:HGNC:27056]                                 | 2.3721228   |
| KRTAP10-10 | keratin associated protein 10-10 [Source:HGNC Symbol;Acc:HGNC:22972]           | -1.2159207  |

|            |                                                                                                     |             |
|------------|-----------------------------------------------------------------------------------------------------|-------------|
| KRTAP10-11 | keratin associated protein 10-11 [Source:HGNC Symbol;Acc:HGNC:20528]                                | 1.0876746   |
| KRTAP10-4  | keratin associated protein 10-4 [Source:HGNC Symbol;Acc:HGNC:20521]                                 | -1.1042213  |
| KRTAP10-9  | keratin associated protein 10-9 [Source:HGNC Symbol;Acc:HGNC:22971]                                 | -1.1157311  |
| KRTAP13-2  | keratin associated protein 13-2 [Source:HGNC Symbol;Acc:HGNC:18923]                                 | -1.0916367  |
| KRTAP19-1  | keratin associated protein 19-1 [Source:HGNC Symbol;Acc:HGNC:18936]                                 | -1.0934671  |
| KRTAP19-2  | keratin associated protein 19-2 [Source:HGNC Symbol;Acc:HGNC:18937]                                 | -1.1741942  |
| KRTAP19-4  | keratin associated protein 19-4 [Source:HGNC Symbol;Acc:HGNC:18939]                                 | 1.1121563   |
| KRTAP20-3  | keratin associated protein 20-3 [Source:HGNC Symbol;Acc:HGNC:34001]                                 | -1.0737506  |
| KRTAP21-1  | keratin associated protein 21-1 [Source:HGNC Symbol;Acc:HGNC:18945]                                 | -1.2780074  |
| KRTAP21-2  | keratin associated protein 21-2 [Source:HGNC Symbol;Acc:HGNC:18946]                                 | -1.0685396  |
| KRTAP27-1  | keratin associated protein 27-1 [Source:HGNC Symbol;Acc:HGNC:33864]                                 | 1.0952574   |
| KRTAP3-1   | keratin associated protein 3-1 [Source:HGNC Symbol;Acc:HGNC:16778]                                  | -1.0867842  |
| KRTAP4-12  | keratin associated protein 4-12 [Source:HGNC Symbol;Acc:HGNC:16776]                                 | -1.152522   |
| KRTAP4-4   | keratin associated protein 4-4 [Source:HGNC Symbol;Acc:HGNC:16928]                                  | 1.1248299   |
| KRTAP4-9   | keratin associated protein 4-9 [Source:HGNC Symbol;Acc:HGNC:18910]                                  | -1.1043428  |
| KRTAP5-4   | keratin associated protein 5-4 [Source:HGNC Symbol;Acc:HGNC:23599]                                  | -1.1343261  |
| KRTAP5-5   | keratin associated protein 5-5 [Source:HGNC Symbol;Acc:HGNC:23601]                                  | -1.1592612  |
| KRTAP5-6   | keratin associated protein 5-6 [Source:HGNC Symbol;Acc:HGNC:23600]                                  | -1.095934   |
| KRTAP9-1   | keratin associated protein 9-1 [Source:HGNC Symbol;Acc:HGNC:18912]                                  | -1.1233598  |
| KRTCAP2    | keratinocyte associated protein 2 [Source:HGNC Symbol;Acc:HGNC:28942]                               | -1.1462412  |
| KSR1       | kinase suppressor of ras 1 [Source:HGNC Symbol;Acc:HGNC:6465]                                       | -1.26323    |
| KSR2       | kinase suppressor of ras 2 [Source:HGNC Symbol;Acc:HGNC:18610]                                      | 1.5434886   |
| LACTB      | lactamase beta [Source:HGNC Symbol;Acc:HGNC:16468]                                                  | -1.3462895  |
| LACTB2     | lactamase beta 2 [Source:HGNC Symbol;Acc:HGNC:18512]                                                | 1.286678    |
| LAIR1      | leukocyte associated immunoglobulin like receptor 1 [Source:HGNC Symbol;Acc:HGNC:6477]              | 1.0558828   |
| LAIR2      | leukocyte associated immunoglobulin like receptor 2 [Source:HGNC Symbol;Acc:HGNC:6478]              | 1.1539493   |
| LAMA1      | laminin subunit alpha 1 [Source:HGNC Symbol;Acc:HGNC:6481]                                          | 1.0761662   |
| LAMA4      | laminin subunit alpha 4 [Source:HGNC Symbol;Acc:HGNC:6484]                                          | -1.1608424  |
| LAMA5      | laminin subunit alpha 5 [Source:HGNC Symbol;Acc:HGNC:6485]                                          | 1.1759576   |
| LAMB1      | laminin subunit beta 1 [Source:HGNC Symbol;Acc:HGNC:6486]                                           | -1.3763217  |
| LAMB2      | laminin subunit beta 2 [Source:HGNC Symbol;Acc:HGNC:6487]                                           | -1.1154493  |
| LAMB3      | laminin subunit beta 3 [Source:HGNC Symbol;Acc:HGNC:6490]                                           | -2.6593647  |
| LAMC2      | laminin subunit gamma 2 [Source:HGNC Symbol;Acc:HGNC:6493]                                          | -3.36951355 |
| LAMP2      | lysosomal associated membrane protein 2 [Source:HGNC Symbol;Acc:HGNC:6501]                          | 1.3237523   |
| LAMP3      | lysosomal associated membrane protein 3 [Source:HGNC Symbol;Acc:HGNC:14582]                         | -1.3825214  |
| LAMTOR2    | late endosomal/lysosomal adaptor, MAPK and MTOR activator 2 [Source:HGNC Symbol;Acc:HGNC:29796]     | 1.176119    |
| LANCL1     | LanC like 1 [Source:HGNC Symbol;Acc:HGNC:6508]                                                      | 1.2090051   |
| LANCL3     | LanC like 3 [Source:HGNC Symbol;Acc:HGNC:24767]                                                     | -1.5825136  |
| LARP6      | La ribonucleoprotein domain family member 6 [Source:HGNC Symbol;Acc:HGNC:24012]                     | -1.77167215 |
| LAT2       | linker for activation of T-cells family member 2 [Source:HGNC Symbol;Acc:HGNC:12749]                | -1.1941824  |
| LAX1       | lymphocyte transmembrane adaptor 1 [Source:HGNC Symbol;Acc:HGNC:26005]                              | 1.1328876   |
| LBR        | lamin B receptor [Source:HGNC Symbol;Acc:HGNC:6518]                                                 | 1.35621     |
| LCAT       | lecithin-cholesterol acyltransferase [Source:HGNC Symbol;Acc:HGNC:6522]                             | -1.2431127  |
| LCMT1      | leucine carboxyl methyltransferase 1 [Source:HGNC Symbol;Acc:HGNC:17557]                            | -1.1402801  |
| LCMT2      | leucine carboxyl methyltransferase 2 [Source:HGNC Symbol;Acc:HGNC:17558]                            | -1.1926348  |
| LCN8       | lipocalin 8 [Source:HGNC Symbol;Acc:HGNC:27038]                                                     | 1.1072338   |
| LDB2       | LIM domain binding 2 [Source:HGNC Symbol;Acc:HGNC:6533]                                             | 1.3065525   |
| LDHC       | lactate dehydrogenase C [Source:HGNC Symbol;Acc:HGNC:6544]                                          | -1.28758    |
| LDLR       | low density lipoprotein receptor [Source:HGNC Symbol;Acc:HGNC:6547]                                 | 1.1372726   |
| LDOL       | leucine zipper down-regulated in cancer 1 [Source:HGNC Symbol;Acc:HGNC:6548]                        | 1.1703067   |
| LECT1      | leukocyte cell derived chemotaxin 1 [Source:HGNC Symbol;Acc:HGNC:17005]                             | -1.0792246  |
| LEP        | leptin [Source:HGNC Symbol;Acc:HGNC:6553]                                                           | 1.052517    |
| LETM1      | leucine zipper and EF-hand containing transmembrane protein 1 [Source:HGNC Symbol;Acc:HGNC:6556]    | -1.1649483  |
| LETM2      | leucine zipper and EF-hand containing transmembrane protein 2 [Source:HGNC Symbol;Acc:HGNC:14648]   | -1.0639598  |
| LETMD1     | LETM1 domain containing 1 [Source:HGNC Symbol;Acc:HGNC:24241]                                       | 1.0909616   |
| LFNG       | LFNG O-fucosyltransferase 3-beta-N-acetylglucosaminyltransferase [Source:HGNC Symbol;Acc:HGNC:6560] | 1.6682773   |
| LGALS14    | galectin 14 [Source:HGNC Symbol;Acc:HGNC:30054]                                                     | 1.1164047   |
| LGALS2     | galectin 2 [Source:HGNC Symbol;Acc:HGNC:6562]                                                       | 1.0507044   |
| LGALS3     | galectin 3 [Source:HGNC Symbol;Acc:HGNC:6563]                                                       | -1.1592638  |
| LGALS3C    | galectin 8 [Source:HGNC Symbol;Acc:HGNC:6569]                                                       | -1.221667   |
| LGALS9C    | galectin 9C [Source:HGNC Symbol;Acc:HGNC:33874]                                                     | -1.610029   |
| LGMN       | legumain [Source:HGNC Symbol;Acc:HGNC:9472]                                                         | -1.3354099  |
| LGR4       | leucine rich repeat containing G protein-coupled receptor 4 [Source:HGNC Symbol;Acc:HGNC:13299]     | 1.3657573   |
| LGR6       | leucine rich repeat containing G protein-coupled receptor 6 [Source:HGNC Symbol;Acc:HGNC:19719]     | 1.128515    |
| LHFP       | lipoma HMGIC fusion partner [Source:HGNC Symbol;Acc:HGNC:6586]                                      | -1.3025622  |
| LHFPL4     | lipoma HMGIC fusion partner-like 4 [Source:HGNC Symbol;Acc:HGNC:29568]                              | -1.1669483  |
| LHX6       | LIM homeobox 6 [Source:HGNC Symbol;Acc:HGNC:21735]                                                  | 1.7909405   |
| LIF        | leukemia inhibitory factor [Source:HGNC Symbol;Acc:HGNC:6596]                                       | -1.442118   |
| LIG3       | DNA ligase 3 [Source:HGNC Symbol;Acc:HGNC:6600]                                                     | 1.2142191   |
| LIMA1      | LIM domain and actin binding 1 [Source:HGNC Symbol;Acc:HGNC:24636]                                  | 1.3701553   |
| LIMCH1     | LIM and calponin homology domains 1 [Source:HGNC Symbol;Acc:HGNC:29191]                             | 1.7698032   |
| LIMD1      | LIM domains containing 1 [Source:HGNC Symbol;Acc:HGNC:6612]                                         | 1.129974    |
| LIMD2      | LIM domain containing 2 [Source:HGNC Symbol;Acc:HGNC:28142]                                         | -1.5295537  |
| LIMK2      | LIM domain kinase 2 [Source:HGNC Symbol;Acc:HGNC:6614]                                              | -1.49604595 |
| LIMS2      | LIM zinc finger domain containing 2 [Source:HGNC Symbol;Acc:HGNC:16084]                             | 1.3352811   |
| LIMS3L     | LIM zinc finger domain containing 4                                                                 | -1.0931861  |
| LIN28A     | lin-28 homolog A [Source:HGNC Symbol;Acc:HGNC:15986]                                                | 1.096894    |
| LIN37      | lin-37 DREAM MuvB core complex component [Source:HGNC Symbol;Acc:HGNC:33234]                        | -1.2702465  |
| LIN54      | lin-54 DREAM MuvB core complex component [Source:HGNC Symbol;Acc:HGNC:25397]                        | 1.6556774   |
| LINGO1     | leucine rich repeat and Ig domain containing 1 [Source:HGNC Symbol;Acc:HGNC:21205]                  | 1.1186749   |
| LIPE       | lipase E, hormone sensitive type [Source:HGNC Symbol;Acc:HGNC:6621]                                 | 1.4499587   |
| LIPK       | lipase family member K [Source:HGNC Symbol;Acc:HGNC:23444]                                          | 1.1416081   |
| LITAF      | lipopolysaccharide induced TNF factor [Source:HGNC Symbol;Acc:HGNC:16841]                           | -1.3813869  |
| LMBR1      | limb development membrane protein 1 [Source:HGNC Symbol;Acc:HGNC:13243]                             | 1.1402656   |
| LMBR3L     | limb development membrane protein 1 like [Source:HGNC Symbol;Acc:HGNC:18268]                        | -1.2192345  |
| LMCD1      | LIM and cysteine rich domains 1 [Source:HGNC Symbol;Acc:HGNC:6633]                                  | 1.8152966   |

|           |                                                                                                     |             |
|-----------|-----------------------------------------------------------------------------------------------------|-------------|
| LMF2      | lipase maturation factor 2 [Source:HGNC Symbol;Acc:HGNC:25096]                                      | 1.4821904   |
| LMNA      | lamin A/C [Source:HGNC Symbol;Acc:HGNC:6636]                                                        | 1.1671559   |
| LMNB1     | lamin B1 [Source:HGNC Symbol;Acc:HGNC:6637]                                                         | 1.4240129   |
| LMO2      | LIM domain only 2 [Source:HGNC Symbol;Acc:HGNC:6642]                                                | 1.3269219   |
| LMO3      | LIM domain only 3 [Source:HGNC Symbol;Acc:HGNC:6643]                                                | 1.0644913   |
| LMO4      | LIM domain only 4 [Source:HGNC Symbol;Acc:HGNC:6644]                                                | 1.4164028   |
| LMO7      | LIM domain 7 [Source:HGNC Symbol;Acc:HGNC:6646]                                                     | 1.1182084   |
| LMTK2     | lemur tyrosine kinase 2 [Source:HGNC Symbol;Acc:HGNC:17880]                                         | -1.1656594  |
| LNK1      | ligand of numb-protein X 1 [Source:HGNC Symbol;Acc:HGNC:6657]                                       | 1.1680574   |
| LONRF3    | LON peptidase N-terminal domain and ring finger 3 [Source:HGNC Symbol;Acc:HGNC:21152]               | 1.59733185  |
| LOX       | lysyl oxidase [Source:HGNC Symbol;Acc:HGNC:6664]                                                    | -1.1914655  |
| LOXL2     | lysyl oxidase like 2 [Source:HGNC Symbol;Acc:HGNC:6666]                                             | -1.1572932  |
| LOXL3     | lysyl oxidase like 3 [Source:HGNC Symbol;Acc:HGNC:13869]                                            | -1.1476412  |
| LOXL4     | lysyl oxidase like 4 [Source:HGNC Symbol;Acc:HGNC:17171]                                            | -1.1571759  |
| LPAR3     | lysophosphatidic acid receptor 3 [Source:HGNC Symbol;Acc:HGNC:14298]                                | -1.0641958  |
| LPKAT4    | lysophosphatidylcholine acyltransferase 4 [Source:HGNC Symbol;Acc:HGNC:30059]                       | 1.244596    |
| LPHN2     | adhesion G protein-coupled receptor L2                                                              | 1.2963302   |
| LRCH1     | leucine rich repeats and calponin homology domain containing 1 [Source:HGNC Symbol;Acc:HGNC:2030]   | -1.1665282  |
| LRG1      | leucine rich alpha-2-glycoprotein 1 [Source:HGNC Symbol;Acc:HGNC:29480]                             | -1.4057187  |
| LRIG1     | leucine rich repeats and immunoglobulin like domains 1 [Source:HGNC Symbol;Acc:HGNC:17360]          | -1.5004224  |
| LRIG2     | leucine rich repeats and immunoglobulin like domains 2 [Source:HGNC Symbol;Acc:HGNC:20889]          | 1.2528557   |
| LRIG3     | leucine rich repeats and immunoglobulin like domains 3 [Source:HGNC Symbol;Acc:HGNC:30991]          | -2.158922   |
| LRT1      | leucine rich repeat, Ig-like and transmembrane domains 1 [Source:HGNC Symbol;Acc:HGNC:23404]        | 1.0577539   |
| LRMP      | lymphoid restricted membrane protein [Source:HGNC Symbol;Acc:HGNC:6690]                             | 1.1006272   |
| LRP10     | LDL receptor related protein 10 [Source:HGNC Symbol;Acc:HGNC:14553]                                 | 1.2956955   |
| LRP12     | LDL receptor related protein 12 [Source:HGNC Symbol;Acc:HGNC:31708]                                 | -1.2618241  |
| LRP4      | LDL receptor related protein 4 [Source:HGNC Symbol;Acc:HGNC:6696]                                   | -1.0742399  |
| LRP5      | LDL receptor related protein 5 [Source:HGNC Symbol;Acc:HGNC:6697]                                   | 1.3727422   |
| LRP8      | LDL receptor related protein 8 [Source:HGNC Symbol;Acc:HGNC:6700]                                   | 1.3845886   |
| LRPPRC    | leucine rich pentatricopeptide repeat containing [Source:HGNC Symbol;Acc:HGNC:15714]                | 1.3553634   |
| LRRC10B   | leucine rich repeat containing 10B [Source:HGNC Symbol;Acc:HGNC:37215]                              | 1.1158272   |
| LRRC17    | leucine rich repeat containing 17 [Source:HGNC Symbol;Acc:HGNC:16895]                               | 1.28771115  |
| LRRC20    | leucine rich repeat containing 20 [Source:HGNC Symbol;Acc:HGNC:23421]                               | 1.700489    |
| LRRC23    | leucine rich repeat containing 23 [Source:HGNC Symbol;Acc:HGNC:19138]                               | -1.100099   |
| LRRC27    | leucine rich repeat containing 27 [Source:HGNC Symbol;Acc:HGNC:29346]                               | 1.0714446   |
| LRRC3     | leucine rich repeat containing 3 [Source:HGNC Symbol;Acc:HGNC:14965]                                | -1.7772814  |
| LRRC32    | leucine rich repeat containing 32 [Source:HGNC Symbol;Acc:HGNC:4161]                                | -1.8764056  |
| LRRC33    | negative regulator of reactive oxygen species                                                       | 1.351554    |
| LRRC36    | leucine rich repeat containing 36 [Source:HGNC Symbol;Acc:HGNC:25615]                               | -1.2503124  |
| LRRC37BP1 | leucine rich repeat containing 37B pseudogene 1 [Source:HGNC Symbol;Acc:HGNC:25390]                 | -1.162778   |
| LRRC3C    | leucine rich repeat containing 3C [Source:HGNC Symbol;Acc:HGNC:40034]                               | -1.2628129  |
| LRRC4     | leucine rich repeat containing 4 [Source:HGNC Symbol;Acc:HGNC:15586]                                | 1.3209989   |
| LRRC42    | leucine rich repeat containing 42 [Source:HGNC Symbol;Acc:HGNC:28792]                               | -1.112394   |
| LRRC47    | leucine rich repeat containing 47 [Source:HGNC Symbol;Acc:HGNC:29207]                               | -1.0724989  |
| LRRC57    | leucine rich repeat containing 57 [Source:HGNC Symbol;Acc:HGNC:26719]                               | -1.3118026  |
| LRRC66    | leucine rich repeat containing 66 [Source:HGNC Symbol;Acc:HGNC:34299]                               | 1.1906478   |
| LRRC70    | leucine rich repeat containing 70 [Source:HGNC Symbol;Acc:HGNC:35155]                               | 1.6328385   |
| LRRC8A    | leucine rich repeat containing 8 family member A [Source:HGNC Symbol;Acc:HGNC:19027]                | 1.2774278   |
| LRRC8D    | leucine rich repeat containing 8 family member D [Source:HGNC Symbol;Acc:HGNC:16992]                | 1.3685906   |
| LRRC1     | leucine rich repeat and coiled-coil centrosomal protein 1 [Source:HGNC Symbol;Acc:HGNC:29373]       | 1.1786047   |
| LRRFIP2   | LRR binding FLII interacting protein 2 [Source:HGNC Symbol;Acc:HGNC:6703]                           | -1.1465592  |
| LRRN2     | leucine rich repeat neuronal 2 [Source:HGNC Symbol;Acc:HGNC:16914]                                  | -1.2214459  |
| LRRTM1    | leucine rich repeat transmembrane neuronal 1 [Source:HGNC Symbol;Acc:HGNC:19408]                    | -1.1170201  |
| LRRTM2    | leucine rich repeat transmembrane neuronal 2 [Source:HGNC Symbol;Acc:HGNC:19409]                    | 1.0802752   |
| LRRTM3    | leucine rich repeat transmembrane neuronal 3 [Source:HGNC Symbol;Acc:HGNC:19410]                    | 1.147034    |
| LRTOMT    | leucine rich transmembrane and O-methyltransferase domain containing [Source:HGNC Symbol;Acc:HGNC:2 | -1.0664679  |
| LSM10     | LSM10, U7 small nuclear RNA associated [Source:HGNC Symbol;Acc:HGNC:17562]                          | 1.1901011   |
| LSM11     | LSM11, U7 small nuclear RNA associated [Source:HGNC Symbol;Acc:HGNC:30860]                          | 1.0894629   |
| LSM12     | LSM12 homolog [Source:HGNC Symbol;Acc:HGNC:26407]                                                   | 1.3058231   |
| LS1       | leukocyte specific transcript 1 [Source:HGNC Symbol;Acc:HGNC:14189]                                 | -1.276297   |
| LTB       | lymphotoxin beta [Source:HGNC Symbol;Acc:HGNC:6711]                                                 | -18.932013  |
| LTBP2     | latent transforming growth factor beta binding protein 2 [Source:HGNC Symbol;Acc:HGNC:6715]         | 1.2837393   |
| LTC4S     | leukotriene C4 synthase [Source:HGNC Symbol;Acc:HGNC:6719]                                          | -1.0717883  |
| LTV1      | LTV1 ribosome biogenesis factor [Source:HGNC Symbol;Acc:HGNC:21173]                                 | 1.5690323   |
| LUZP2     | leucine zipper protein 2 [Source:HGNC Symbol;Acc:HGNC:23206]                                        | 1.0500579   |
| LXN       | latexin [Source:HGNC Symbol;Acc:HGNC:13347]                                                         | 1.3052856   |
| LY6E      | lymphocyte antigen 6 complex, locus E [Source:HGNC Symbol;Acc:HGNC:6727]                            | 1.4366633   |
| LY6G6E    | lymphocyte antigen 6 complex, locus G6E [Source:HGNC Symbol;Acc:HGNC:13934]                         | -1.1221377  |
| LY86      | lymphocyte antigen 86 [Source:HGNC Symbol;Acc:HGNC:16837]                                           | -1.1978259  |
| LYG1      | lysozyme g1 [Source:HGNC Symbol;Acc:HGNC:27014]                                                     | 1.0597007   |
| LYL1      | LYL1, basic helix-loop-helix family member [Source:HGNC Symbol;Acc:HGNC:6734]                       | 1.9544288   |
| LYN       | LYN proto-oncogene, Src family tyrosine kinase [Source:HGNC Symbol;Acc:HGNC:6735]                   | 1.4003502   |
| LYNX1     | LY6/neurotoxin 1 [Source:HGNC Symbol;Acc:HGNC:29604]                                                | -1.08229535 |
| LYPD1     | LY6/PLAUR domain containing 1 [Source:HGNC Symbol;Acc:HGNC:28431]                                   | 1.6627007   |
| LYPD6     | LY6/PLAUR domain containing 6 [Source:HGNC Symbol;Acc:HGNC:28751]                                   | -1.8305895  |
| LYPLA1    | lysophospholipase I [Source:HGNC Symbol;Acc:HGNC:6737]                                              | 1.2579392   |
| LYPLA2    | lysophospholipase II [Source:HGNC Symbol;Acc:HGNC:6738]                                             | 1.3950955   |
| LYRM4     | LYR motif containing 4 [Source:HGNC Symbol;Acc:HGNC:21365]                                          | -1.267826   |
| LYSMD2    | LysM domain containing 2 [Source:HGNC Symbol;Acc:HGNC:28571]                                        | 1.2302854   |
| LYSMD4    | LysM domain containing 4 [Source:HGNC Symbol;Acc:HGNC:26571]                                        | -1.2102098  |
| LYST      | lysosomal trafficking regulator [Source:HGNC Symbol;Acc:HGNC:1968]                                  | 1.1439046   |
| LYZL6     | lysozyme like 6 [Source:HGNC Symbol;Acc:HGNC:29614]                                                 | 1.0975963   |
| LZIC      | leucine zipper and CTNBP1 domain containing [Source:HGNC Symbol;Acc:HGNC:17497]                     | 1.1074947   |
| LZTS2     | leucine zipper tumor suppressor 2 [Source:HGNC Symbol;Acc:HGNC:29381]                               | 1.0875145   |
| MAD2L1    | MAD2 mitotic arrest deficient-like 1 (yeast) [Source:HGNC Symbol;Acc:HGNC:6763]                     | 1.4784863   |
| MAD2L1BP  | MAD2L1 binding protein [Source:HGNC Symbol;Acc:HGNC:21059]                                          | -1.1888171  |

|          |                                                                                                   |             |
|----------|---------------------------------------------------------------------------------------------------|-------------|
| MAD2L2   | MAD2 mitotic arrest deficient-like 2 (yeast) [Source:HGNC Symbol;Acc:HGNC:6764]                   | -1.0844967  |
| MAEA     | macrophage erythroblast attacher [Source:HGNC Symbol;Acc:HGNC:13731]                              | -1.1533428  |
| MAF1     | MAF1 homolog, negative regulator of RNA polymerase III [Source:HGNC Symbol;Acc:HGNC:24966]        | 1.2340903   |
| MAFB     | MAF bZIP transcription factor B [Source:HGNC Symbol;Acc:HGNC:6408]                                | 1.40811905  |
| MAFF     | MAF bZIP transcription factor F [Source:HGNC Symbol;Acc:HGNC:6780]                                | -1.7996502  |
| MAFK     | MAF bZIP transcription factor K [Source:HGNC Symbol;Acc:HGNC:6782]                                | 1.1679516   |
| MAGEA12  | MAGE family member A12 [Source:HGNC Symbol;Acc:HGNC:6799]                                         | 1.0825344   |
| MAGEB16  | MAGE family member B16 [Source:HGNC Symbol;Acc:HGNC:21188]                                        | 1.0903957   |
| MAGEB17  | MAGE family member B17 [Source:HGNC Symbol;Acc:HGNC:17418]                                        | 1.1255401   |
| MAGEB18  | MAGE family member B18 [Source:HGNC Symbol;Acc:HGNC:28515]                                        | 1.1000487   |
| MAGEC1   | MAGE family member C1 [Source:HGNC Symbol;Acc:HGNC:6812]                                          | -1.0932069  |
| MAGED2   | MAGE family member D2 [Source:HGNC Symbol;Acc:HGNC:16353]                                         | -1.1548064  |
| MAGEE1   | MAGE family member E1 [Source:HGNC Symbol;Acc:HGNC:24934]                                         | 1.3016329   |
| MAGI1    | brane associated guanylate kinase, WW and PDZ domain containing 1 [Source:HGNC Symbol;Acc:HGNC    | -1.1452323  |
| MAK16    | MAK16 homolog [Source:HGNC Symbol;Acc:HGNC:13703]                                                 | 1.3633536   |
| MALL     | mal, T-cell differentiation protein like [Source:HGNC Symbol;Acc:HGNC:6818]                       | 1.2325159   |
| MAMDC4   | MAM domain containing 4 [Source:HGNC Symbol;Acc:HGNC:24083]                                       | -1.1120011  |
| MAN2A2   | mannosidase alpha class 2A member 2 [Source:HGNC Symbol;Acc:HGNC:6825]                            | -1.0812061  |
| MAN2B1   | mannosidase alpha class 2B member 1 [Source:HGNC Symbol;Acc:HGNC:6826]                            | -1.2858471  |
| MAN2B2   | mannosidase alpha class 2B member 2 [Source:HGNC Symbol;Acc:HGNC:29623]                           | -1.1802673  |
| MAP2     | microtubule associated protein 2 [Source:HGNC Symbol;Acc:HGNC:6839]                               | 1.3737687   |
| MAP2K1   | mitogen-activated protein kinase kinase 1 [Source:HGNC Symbol;Acc:HGNC:6840]                      | -1.3636717  |
| MAP2K3   | mitogen-activated protein kinase kinase 3 [Source:HGNC Symbol;Acc:HGNC:6843]                      | -2.04736985 |
| MAP2K6   | mitogen-activated protein kinase kinase 6 [Source:HGNC Symbol;Acc:HGNC:6846]                      | 1.3487295   |
| MAP3K1   | mitogen-activated protein kinase kinase kinase 1 [Source:HGNC Symbol;Acc:HGNC:6848]               | -1.6828507  |
| MAP3K11  | mitogen-activated protein kinase kinase kinase 11 [Source:HGNC Symbol;Acc:HGNC:6850]              | -1.4856573  |
| MAP3K12  | mitogen-activated protein kinase kinase kinase 12 [Source:HGNC Symbol;Acc:HGNC:6851]              | 1.2681408   |
| MAP3K5   | mitogen-activated protein kinase kinase kinase 5 [Source:HGNC Symbol;Acc:HGNC:6857]               | -1.2381017  |
| MAP3K8   | mitogen-activated protein kinase kinase kinase 8 [Source:HGNC Symbol;Acc:HGNC:6860]               | -2.29677995 |
| MAP6D1   | MAP6 domain containing 1 [Source:HGNC Symbol;Acc:HGNC:25753]                                      | 1.2164681   |
| MAP7D1   | MAP7 domain containing 1 [Source:HGNC Symbol;Acc:HGNC:25514]                                      | -1.18308955 |
| MAP7D3   | MAP7 domain containing 3 [Source:HGNC Symbol;Acc:HGNC:25742]                                      | 1.2764419   |
| MAP9     | microtubule associated protein 9 [Source:HGNC Symbol;Acc:HGNC:26118]                              | -1.1121889  |
| MAPK10   | mitogen-activated protein kinase 10 [Source:HGNC Symbol;Acc:HGNC:6872]                            | 1.0967678   |
| MAPK1P1L | mitogen-activated protein kinase 1 interacting protein 1 like [Source:HGNC Symbol;Acc:HGNC:19840] | -1.0867488  |
| MAPKBP1  | mitogen-activated protein kinase binding protein 1 [Source:HGNC Symbol;Acc:HGNC:29536]            | -1.4924357  |
| MAPRE1   | microtubule associated protein RP/EB family member 1 [Source:HGNC Symbol;Acc:HGNC:6890]           | -1.1757857  |
| MARCH1   | membrane associated ring-CH-type finger 1 [Source:HGNC Symbol;Acc:HGNC:26077]                     | 1.0513215   |
| MARCH8   | membrane associated ring-CH-type finger 8 [Source:HGNC Symbol;Acc:HGNC:23356]                     | -1.1295424  |
| MARCK4   | microtubule affinity regulating kinase 4 [Source:HGNC Symbol;Acc:HGNC:13538]                      | 1.3102645   |
| MARVELD2 | MARVEL domain containing 2 [Source:HGNC Symbol;Acc:HGNC:26401]                                    | 1.0867399   |
| MAST3    | microtubule associated serine/threonine kinase 3 [Source:HGNC Symbol;Acc:HGNC:19036]              | 1.3020526   |
| MAT2A    | methionine adenosyltransferase 2A [Source:HGNC Symbol;Acc:HGNC:6904]                              | 1.3899198   |
| MATN1    | matrilin 1, cartilage matrix protein [Source:HGNC Symbol;Acc:HGNC:6907]                           | -1.0770924  |
| MAVS     | mitochondrial antiviral signaling protein [Source:HGNC Symbol;Acc:HGNC:29233]                     | -1.2003858  |
| MAX      | MYC associated factor X [Source:HGNC Symbol;Acc:HGNC:6913]                                        | -1.1277468  |
| MAZ      | MYC associated zinc finger protein [Source:HGNC Symbol;Acc:HGNC:6914]                             | 1.2998579   |
| MB21D1   | Mab-21 domain containing 1 [Source:HGNC Symbol;Acc:HGNC:21367]                                    | -1.8753603  |
| MBD2     | methyl-CpG binding domain protein 2 [Source:HGNC Symbol;Acc:HGNC:6917]                            | 1.0632762   |
| MBD4     | methyl-CpG binding domain 4, DNA glycosylase [Source:HGNC Symbol;Acc:HGNC:6919]                   | 1.3388196   |
| MBD6     | methyl-CpG binding domain protein 6 [Source:HGNC Symbol;Acc:HGNC:20445]                           | 1.1919225   |
| MBL1P    | mannose binding lectin 1, pseudogene [Source:HGNC Symbol;Acc:HGNC:6921]                           | 1.2029426   |
| MBLAC2   | metallo-beta-lactamase domain containing 2 [Source:HGNC Symbol;Acc:HGNC:33711]                    | 1.5626351   |
| MBNL1    | muscleblind like splicing regulator 1 [Source:HGNC Symbol;Acc:HGNC:6923]                          | 1.9377193   |
| MBOA17   | membrane bound O-acyltransferase domain containing 7 [Source:HGNC Symbol;Acc:HGNC:15505]          | 1.1796237   |
| MBP      | myelin basic protein [Source:HGNC Symbol;Acc:HGNC:6925]                                           | -1.5389285  |
| MCCR5    | melanocortin 5 receptor [Source:HGNC Symbol;Acc:HGNC:6933]                                        | -1.167776   |
| MCEE     | methylmalonyl-CoA epimerase [Source:HGNC Symbol;Acc:HGNC:16732]                                   | 1.1203659   |
| MCM10    | minichromosome maintenance 10 replication initiation factor [Source:HGNC Symbol;Acc:HGNC:18043]   | 1.3772166   |
| MCM8     | romosome maintenance 8 homologous recombination repair factor [Source:HGNC Symbol;Acc:HGNC:1      | 1.2662569   |
| MCTP1    | multiple C2 and transmembrane domain containing 1 [Source:HGNC Symbol;Acc:HGNC:26183]             | -1.3161192  |
| MDFI     | MyoD family inhibitor [Source:HGNC Symbol;Acc:HGNC:6967]                                          | 2.0532594   |
| MDFIC    | MyoD family inhibitor domain containing [Source:HGNC Symbol;Acc:HGNC:28870]                       | 1.2545575   |
| MDGA1    | VIAM domain containing glycosylphosphatidylinositol anchor 1 [Source:HGNC Symbol;Acc:HGNC:19267   | -1.2395235  |
| MDK      | midkine (neurite growth-promoting factor 2) [Source:HGNC Symbol;Acc:HGNC:6972]                    | 1.1536686   |
| MECOM    | MDS1 and EVI1 complex locus [Source:HGNC Symbol;Acc:HGNC:3498]                                    | 1.5965287   |
| MECP2    | methyl-CpG binding protein 2 [Source:HGNC Symbol;Acc:HGNC:6990]                                   | -1.1727586  |
| MED12L   | mediator complex subunit 12 like [Source:HGNC Symbol;Acc:HGNC:16050]                              | 1.0820377   |
| MED15    | mediator complex subunit 15 [Source:HGNC Symbol;Acc:HGNC:14248]                                   | -1.1365343  |
| MED18    | mediator complex subunit 18 [Source:HGNC Symbol;Acc:HGNC:25944]                                   | 1.3001593   |
| MED22    | mediator complex subunit 22 [Source:HGNC Symbol;Acc:HGNC:11477]                                   | -1.1676494  |
| MED24    | mediator complex subunit 24 [Source:HGNC Symbol;Acc:HGNC:22963]                                   | -1.2291209  |
| MED30    | mediator complex subunit 30 [Source:HGNC Symbol;Acc:HGNC:23032]                                   | 1.1423309   |
| MED7     | mediator complex subunit 7 [Source:HGNC Symbol;Acc:HGNC:2378]                                     | 1.1232998   |
| MED8     | mediator complex subunit 8 [Source:HGNC Symbol;Acc:HGNC:19971]                                    | 1.1588145   |
| MEF2C    | myocyte enhancer factor 2C [Source:HGNC Symbol;Acc:HGNC:6996]                                     | 1.732577    |
| MEG3     | maternally expressed 3 (non-protein coding) [Source:HGNC Symbol;Acc:HGNC:14575]                   | 1.1385375   |
| MEGF11   | multiple EGF like domains 11 [Source:HGNC Symbol;Acc:HGNC:29635]                                  | -1.259317   |
| MEIS1    | Meis homeobox 1 [Source:HGNC Symbol;Acc:HGNC:7000]                                                | 1.2862391   |
| MEIS3    | Meis homeobox 3 [Source:HGNC Symbol;Acc:HGNC:29537]                                               | -1.1067299  |
| MEMO1    | mediator of cell motility 1 [Source:HGNC Symbol;Acc:HGNC:14014]                                   | -1.2563117  |
| MEOX1    | mesenchyme homeobox 1 [Source:HGNC Symbol;Acc:HGNC:7013]                                          | -1.0681096  |
| MEOX2    | mesenchyme homeobox 2 [Source:HGNC Symbol;Acc:HGNC:7014]                                          | 1.2465036   |
| MERTK    | MER proto-oncogene, tyrosine kinase [Source:HGNC Symbol;Acc:HGNC:7027]                            | 1.7708983   |
| MESDC1   | mesoderm development candidate 1 [Source:HGNC Symbol;Acc:HGNC:13519]                              | -1.2323112  |
| MESP2    | mesoderm posterior bHLH transcription factor 2 [Source:HGNC Symbol;Acc:HGNC:29659]                | -1.3541715  |

|            |                                                                                                               |              |
|------------|---------------------------------------------------------------------------------------------------------------|--------------|
| MET        | MET proto-oncogene, receptor tyrosine kinase [Source:HGNC Symbol;Acc:HGNC:7029]                               | 1.4105467    |
| METAP2     | methionyl aminopeptidase 2 [Source:HGNC Symbol;Acc:HGNC:16672]                                                | 1.3503747    |
| METRNL     | meteorin like, glial cell differentiation regulator [Source:HGNC Symbol;Acc:HGNC:27584]                       | 1.2885134    |
| METTL6     | methyltransferase like 16 [Source:HGNC Symbol;Acc:HGNC:28484]                                                 | -1.1863065   |
| METTL19    | tRNA methyltransferase 44 homolog (S. cerevisiae)                                                             | -1.2194794   |
| METTL20    | electron transfer flavoprotein beta subunit lysine methyltransferase                                          | 1.1098088    |
| METTL21A   | methyltransferase like 21A [Source:HGNC Symbol;Acc:HGNC:30476]                                                | -1.1722832   |
| METTL21D   | valosin containing protein lysine methyltransferase                                                           | 1.3069048    |
| METTL23    | methyltransferase like 23 [Source:HGNC Symbol;Acc:HGNC:26988]                                                 | 1.0751764    |
| METTL2A    | methyltransferase like 2A [Source:HGNC Symbol;Acc:HGNC:25755]                                                 | -1.2067413   |
| METTL5     | methyltransferase like 5 [Source:HGNC Symbol;Acc:HGNC:25006]                                                  | 1.1911906    |
| METTL7A    | methyltransferase like 7A [Source:HGNC Symbol;Acc:HGNC:24550]                                                 | 1.2778786    |
| METTL8     | methyltransferase like 8 [Source:HGNC Symbol;Acc:HGNC:25856]                                                  | 1.1501254    |
| MEX3A      | mex-3 RNA binding family member A [Source:HGNC Symbol;Acc:HGNC:33482]                                         | 1.0990336    |
| MEX3D      | mex-3 RNA binding family member D [Source:HGNC Symbol;Acc:HGNC:16734]                                         | -1.1856425   |
| MFAP1      | microfibrillar associated protein 1 [Source:HGNC Symbol;Acc:HGNC:7032]                                        | 1.2509974    |
| MTF        | mitochondrial fission factor [Source:HGNC Symbol;Acc:HGNC:24858]                                              | 1.05885925   |
| MFGE8      | milk fat globule-EGF factor 8 protein [Source:HGNC Symbol;Acc:HGNC:7036]                                      | 1.2469249    |
| MFHAS1     | malignant fibrous histiocytoma amplified sequence 1 [Source:HGNC Symbol;Acc:HGNC:16982]                       | -1.2710286   |
| MFNG       | MFNG O-fucosylpeptide 3-beta-N-acetylglucosaminyltransferase [Source:HGNC Symbol;Acc:HGNC:7038]               | 1.1598064    |
| MFSD10     | major facilitator superfamily domain containing 10 [Source:HGNC Symbol;Acc:HGNC:16894]                        | 1.2072862    |
| MFSD2B     | major facilitator superfamily domain containing 2B [Source:HGNC Symbol;Acc:HGNC:37207]                        | -1.0713822   |
| MFSD9      | major facilitator superfamily domain containing 9 [Source:HGNC Symbol;Acc:HGNC:28158]                         | -1.1633606   |
| MGAT1      | syl (alpha-1,3-)-glycoprotein beta-1,2-N-acetylglucosaminyltransferase [Source:HGNC Symbol;Acc:HGNC:1674305]  | 1.1674305    |
| MGAT3      | syl (beta-1,4-)-glycoprotein beta-1,4-N-acetylglucosaminyltransferase [Source:HGNC Symbol;Acc:HGNC:1135487]   | 1.135487     |
| MGAT4A     | pha-1,3-)-glycoprotein beta-1,4-N-acetylglucosaminyltransferase, isozyme A [Source:HGNC Symbol;Acc:1.4266751] | 1.4266751    |
| MGAT5B     | pha-1,6-)-glycoprotein beta-1,6-N-acetylglucosaminyltransferase, isozyme B [Source:HGNC Symbol;Acc:1.3078734] | 1.3078734    |
| MGC11082   | DLGAP1 antisense RNA 2                                                                                        | -1.6289334   |
| MGC16121   | MIR503 host gene                                                                                              | 1.3811054    |
| MGC16703   | tubulin alpha 3f pseudogene                                                                                   | -1.2418202   |
| MGC21881   | glioblastoma down-regulated RNA                                                                               | -1.2184538   |
| MGC2752    | CENPB DNA-binding domains containing 1 pseudogene 1                                                           | -1.1507071   |
| MGC2889    | uncharacterized protein MGC2889                                                                               | 1.0799145    |
| MGC39372   | serpin family B member 9 pseudogene 1                                                                         | -1.1760616   |
| MGC4294    | long intergenic non-protein coding RNA 1711                                                                   | 1.2049396    |
| MGC45800   | uncharacterized LOC90768                                                                                      | -1.0570949   |
| MGC4859    | uncharacterized LOC79150                                                                                      | -1.1151105   |
| MGLL       | monoglyceride lipase [Source:HGNC Symbol;Acc:HGNC:17038]                                                      | -1.4361192   |
| MGP        | matrix Gla protein [Source:HGNC Symbol;Acc:HGNC:7060]                                                         | -1.2073275   |
| MGRN1      | mahogunin ring finger 1 [Source:HGNC Symbol;Acc:HGNC:20254]                                                   | -1.2108285   |
| MGST2      | microsomal glutathione S-transferase 2 [Source:HGNC Symbol;Acc:HGNC:7063]                                     | 1.105127     |
| MGST3      | microsomal glutathione S-transferase 3 [Source:HGNC Symbol;Acc:HGNC:7064]                                     | 1.1515713    |
| MICAL3     | ule associated monooxygenase, calponin and LIM domain containing 3 [Source:HGNC Symbol;Acc:HGNC:1643714967]   | -1.643714967 |
| MICB       | MHC class I polypeptide-related sequence B [Source:HGNC Symbol;Acc:HGNC:7091]                                 | -1.27163005  |
| MID1P1     | MID1 interacting protein 1 [Source:HGNC Symbol;Acc:HGNC:20715]                                                | 1.0643475    |
| MID2       | midline 2 [Source:HGNC Symbol;Acc:HGNC:7096]                                                                  | -1.0976106   |
| MIDN       | midnolin [Source:HGNC Symbol;Acc:HGNC:16298]                                                                  | 1.2447886    |
| MIER1      | MIER1 transcriptional regulator [Source:HGNC Symbol;Acc:HGNC:29657]                                           | 1.3780077    |
| MINK1      | misshapen like kinase 1 [Source:HGNC Symbol;Acc:HGNC:17565]                                                   | 1.1205242    |
| MIOS       | meiosis regulator for oocyte development [Source:HGNC Symbol;Acc:HGNC:21905]                                  | -1.0545697   |
| MIOX       | myo-inositol oxygenase [Source:HGNC Symbol;Acc:HGNC:14522]                                                    | -1.2139149   |
| MIP        | major intrinsic protein of lens fiber [Source:HGNC Symbol;Acc:HGNC:7103]                                      | 1.4521441    |
| MIR155HG   | MIR155 host gene [Source:HGNC Symbol;Acc:HGNC:35460]                                                          | -2.5394192   |
| MIRLET7BHG | MIRLET7B host gene [Source:HGNC Symbol;Acc:HGNC:37189]                                                        | 1.3963397    |
| MKI67IP    | nucleolar protein interacting with the FHA domain of MKI67                                                    | 1.38307525   |
| MKKS       | McKusick-Kaufman syndrome [Source:HGNC Symbol;Acc:HGNC:7108]                                                  | 1.1649472    |
| MKL1       | megakaryoblastic leukemia (translocation) 1 [Source:HGNC Symbol;Acc:HGNC:14334]                               | -1.4735155   |
| MKNK2      | MAP kinase interacting serine/threonine kinase 2 [Source:HGNC Symbol;Acc:HGNC:7111]                           | 1.225927     |
| MLF1       | myeloid leukemia factor 1 [Source:HGNC Symbol;Acc:HGNC:7125]                                                  | 1.096421     |
| MLF2       | myeloid leukemia factor 2 [Source:HGNC Symbol;Acc:HGNC:7126]                                                  | 1.1868397    |
| MLL        | lysine methyltransferase 2A                                                                                   | -1.102478    |
| MLL2       | lysine methyltransferase 2B                                                                                   | 1.0893265    |
| MLLT1      | MLLT1, super elongation complex subunit [Source:HGNC Symbol;Acc:HGNC:7134]                                    | 1.31923705   |
| MLLT4      | afadin, adherens junction formation factor                                                                    | -1.1177746   |
| MLNR       | motilin receptor [Source:HGNC Symbol;Acc:HGNC:4495]                                                           | -1.0594629   |
| MLPH       | melanophilin [Source:HGNC Symbol;Acc:HGNC:29643]                                                              | -1.3020072   |
| MLX        | MLX, MAX dimerization protein [Source:HGNC Symbol;Acc:HGNC:11645]                                             | 1.0578768    |
| MLXIP      | MLX interacting protein [Source:HGNC Symbol;Acc:HGNC:17055]                                                   | 1.2191186    |
| MLYCD      | malonyl-CoA decarboxylase [Source:HGNC Symbol;Acc:HGNC:7150]                                                  | 1.214921     |
| MMD        | monocyte to macrophage differentiation associated [Source:HGNC Symbol;Acc:HGNC:7153]                          | -1.885646    |
| MMP10      | matrix metallopeptidase 10 [Source:HGNC Symbol;Acc:HGNC:7156]                                                 | -1.6477629   |
| MMP14      | matrix metallopeptidase 14 [Source:HGNC Symbol;Acc:HGNC:7160]                                                 | 1.1654681    |
| MMP16      | matrix metallopeptidase 16 [Source:HGNC Symbol;Acc:HGNC:7162]                                                 | 1.1834044    |
| MMP19      | matrix metallopeptidase 19 [Source:HGNC Symbol;Acc:HGNC:7165]                                                 | -1.4415941   |
| MMP23B     | matrix metallopeptidase 23B [Source:HGNC Symbol;Acc:HGNC:7171]                                                | -1.1704142   |
| MMP25      | matrix metallopeptidase 25 [Source:HGNC Symbol;Acc:HGNC:14246]                                                | -1.1620309   |
| MMP27      | matrix metallopeptidase 27 [Source:HGNC Symbol;Acc:HGNC:14250]                                                | 1.0879872    |
| MMP9       | matrix metallopeptidase 9 [Source:HGNC Symbol;Acc:HGNC:7176]                                                  | -1.1594485   |
| MMRN2      | multimerin 2 [Source:HGNC Symbol;Acc:HGNC:19888]                                                              | -1.1682253   |
| MND1       | meiotic nuclear divisions 1 [Source:HGNC Symbol;Acc:HGNC:24839]                                               | 1.204853     |
| MNT        | MAX network transcriptional repressor [Source:HGNC Symbol;Acc:HGNC:7188]                                      | 1.1576973    |
| MOB2       | MOB kinase activator 2 [Source:HGNC Symbol;Acc:HGNC:24904]                                                    | -1.1598198   |
| MOBK1B     | MOB kinase activator 1A                                                                                       | 1.1134045    |
| MOBK1C     | MOB kinase activator 3C                                                                                       | -2.2491398   |
| MOBK3      | MOB family member 4, phocein                                                                                  | 1.24318365   |
| MOBP       | myelin-associated oligodendrocyte basic protein [Source:HGNC Symbol;Acc:HGNC:7189]                            | -1.1642436   |

|           |                                                                                           |             |
|-----------|-------------------------------------------------------------------------------------------|-------------|
| MOC51     | molybdenum cofactor synthesis 1 [Source:HGNC Symbol;Acc:HGNC:7190]                        | 1.1009277   |
| MOGAT1    | monoacylglycerol O-acyltransferase 1 [Source:HGNC Symbol;Acc:HGNC:18210]                  | -1.2528812  |
| MORC2-AS1 | MORC2 antisense RNA 1 [Source:HGNC Symbol;Acc:HGNC:26662]                                 | 1.1463794   |
| MORN1     | MORN repeat containing 1 [Source:HGNC Symbol;Acc:HGNC:25852]                              | -1.1297684  |
| MORN3     | MORN repeat containing 3 [Source:HGNC Symbol;Acc:HGNC:29807]                              | -1.13824    |
| MORN4     | MORN repeat containing 4 [Source:HGNC Symbol;Acc:HGNC:24001]                              | 1.1473721   |
| MOSC2     | mitochondrial amidoxime reducing component 2                                              | -1.1242934  |
| MOSPD1    | motile sperm domain containing 1 [Source:HGNC Symbol;Acc:HGNC:25235]                      | 1.1763078   |
| MOV10L1   | Mov10 RISC complex RNA helicase like 1 [Source:HGNC Symbol;Acc:HGNC:7201]                 | -1.0674996  |
| MPHOSPH6  | M-phase phosphoprotein 6 [Source:HGNC Symbol;Acc:HGNC:7214]                               | 1.1629133   |
| MPO       | myeloperoxidase [Source:HGNC Symbol;Acc:HGNC:7218]                                        | 1.0691131   |
| MPP7      | membrane palmitoylated protein 7 [Source:HGNC Symbol;Acc:HGNC:26542]                      | 1.1265938   |
| MPPPE1    | metallophosphoesterase 1 [Source:HGNC Symbol;Acc:HGNC:15988]                              | 1.1038941   |
| MPPED1    | metallophosphoesterase domain containing 1 [Source:HGNC Symbol;Acc:HGNC:1306]             | -1.0636511  |
| MPRIIP    | myosin phosphatase Rho interacting protein [Source:HGNC Symbol;Acc:HGNC:30321]            | -1.3379905  |
| MPZ       | myelin protein zero [Source:HGNC Symbol;Acc:HGNC:7225]                                    | 1.0962515   |
| MPZL1     | myelin protein zero like 1 [Source:HGNC Symbol;Acc:HGNC:7226]                             | -1.4519815  |
| MPZL2     | myelin protein zero like 2 [Source:HGNC Symbol;Acc:HGNC:3496]                             | 1.323316    |
| MPZL3     | myelin protein zero like 3 [Source:HGNC Symbol;Acc:HGNC:27279]                            | 1.0789009   |
| MRC1      | mannose receptor, C type 1 [Source:HGNC Symbol;Acc:HGNC:7228]                             | -1.0991772  |
| MREG      | melanoregulin [Source:HGNC Symbol;Acc:HGNC:25478]                                         | -1.3085295  |
| MRFAP1L1  | Morf4 family associated protein 1 like 1 [Source:HGNC Symbol;Acc:HGNC:28796]              | 1.1562331   |
| MRGPRE    | MAS related GPR family member E [Source:HGNC Symbol;Acc:HGNC:30694]                       | -1.1289794  |
| MRGPRX1   | MAS related GPR family member X1 [Source:HGNC Symbol;Acc:HGNC:17962]                      | -1.0760711  |
| MRGPRX2   | MAS related GPR family member X2 [Source:HGNC Symbol;Acc:HGNC:17983]                      | 1.0708988   |
| MRI1      | methylthioribose-1-phosphate isomerase 1 [Source:HGNC Symbol;Acc:HGNC:28469]              | -1.2267312  |
| MRPL14    | mitochondrial ribosomal protein L14 [Source:HGNC Symbol;Acc:HGNC:14279]                   | -1.1930573  |
| MRPL15    | mitochondrial ribosomal protein L15 [Source:HGNC Symbol;Acc:HGNC:14054]                   | 1.1982453   |
| MRPL16    | mitochondrial ribosomal protein L16 [Source:HGNC Symbol;Acc:HGNC:14476]                   | 1.0670502   |
| MRPL17    | mitochondrial ribosomal protein L17 [Source:HGNC Symbol;Acc:HGNC:14053]                   | 1.2097844   |
| MRPL19    | mitochondrial ribosomal protein L19 [Source:HGNC Symbol;Acc:HGNC:14052]                   | 1.3548182   |
| MRPL20    | mitochondrial ribosomal protein L20 [Source:HGNC Symbol;Acc:HGNC:14478]                   | 1.1055131   |
| MRPL22    | mitochondrial ribosomal protein L22 [Source:HGNC Symbol;Acc:HGNC:14480]                   | 1.1027917   |
| MRPL34    | mitochondrial ribosomal protein L34 [Source:HGNC Symbol;Acc:HGNC:14488]                   | 1.0947809   |
| MRPL36    | mitochondrial ribosomal protein L36 [Source:HGNC Symbol;Acc:HGNC:14490]                   | 1.0553206   |
| MRPL42    | mitochondrial ribosomal protein L42 [Source:HGNC Symbol;Acc:HGNC:14493]                   | 1.4151822   |
| MRPL43    | mitochondrial ribosomal protein L43 [Source:HGNC Symbol;Acc:HGNC:14517]                   | -1.0981148  |
| MRPL45    | mitochondrial ribosomal protein L45 [Source:HGNC Symbol;Acc:HGNC:16651]                   | -1.1249841  |
| MRPL46    | mitochondrial ribosomal protein L46 [Source:HGNC Symbol;Acc:HGNC:1192]                    | -1.1880796  |
| MRPL48    | mitochondrial ribosomal protein L48 [Source:HGNC Symbol;Acc:HGNC:16653]                   | -1.1897266  |
| MRPL50    | mitochondrial ribosomal protein L50 [Source:HGNC Symbol;Acc:HGNC:16654]                   | 1.4921547   |
| MRPL51    | mitochondrial ribosomal protein L51 [Source:HGNC Symbol;Acc:HGNC:14044]                   | 1.208421    |
| MRPS17    | mitochondrial ribosomal protein S17 [Source:HGNC Symbol;Acc:HGNC:14047]                   | 1.0989085   |
| MRPS18A   | mitochondrial ribosomal protein S18A [Source:HGNC Symbol;Acc:HGNC:14515]                  | -1.2290243  |
| MRPS21    | mitochondrial ribosomal protein S21 [Source:HGNC Symbol;Acc:HGNC:14046]                   | 1.0657355   |
| MRPS26    | mitochondrial ribosomal protein S26 [Source:HGNC Symbol;Acc:HGNC:14045]                   | 1.1707754   |
| MRPS31    | mitochondrial ribosomal protein S31 [Source:HGNC Symbol;Acc:HGNC:16632]                   | 1.2290998   |
| MRPS7     | mitochondrial ribosomal protein S7 [Source:HGNC Symbol;Acc:HGNC:14499]                    | -1.1262017  |
| MRTO4     | MRT4 homolog, ribosome maturation factor [Source:HGNC Symbol;Acc:HGNC:18477]              | -1.1262721  |
| MS4A14    | membrane spanning 4-domains A14 [Source:HGNC Symbol;Acc:HGNC:30706]                       | -1.129945   |
| MSH2      | mutS homolog 2 [Source:HGNC Symbol;Acc:HGNC:7325]                                         | 1.4469556   |
| MSH5      | mutS homolog 5 [Source:HGNC Symbol;Acc:HGNC:7328]                                         | 1.0866443   |
| MSH6      | mutS homolog 6 [Source:HGNC Symbol;Acc:HGNC:7329]                                         | 1.527479    |
| MSI2      | musashi RNA binding protein 2 [Source:HGNC Symbol;Acc:HGNC:18585]                         | -1.21237435 |
| MSL3      | male-specific lethal 3 homolog (Drosophila) [Source:HGNC Symbol;Acc:HGNC:7370]            | -1.2064348  |
| MSTN      | myostatin [Source:HGNC Symbol;Acc:HGNC:4223]                                              | 1.0734158   |
| MSX1      | msh homeobox 1 [Source:HGNC Symbol;Acc:HGNC:7391]                                         | -3.1839964  |
| MSX2      | msh homeobox 2 [Source:HGNC Symbol;Acc:HGNC:7392]                                         | -1.2300427  |
| MT1G      | metallothionein 1G [Source:HGNC Symbol;Acc:HGNC:7399]                                     | -1.3278118  |
| MT1H      | metallothionein 1H [Source:HGNC Symbol;Acc:HGNC:7400]                                     | -1.1419755  |
| MT1IP     | metallothionein 1I, pseudogene                                                            | -1.0530771  |
| MT4       | metallothionein 4 [Source:HGNC Symbol;Acc:HGNC:18705]                                     | 1.1051198   |
| MTA1      | metastasis associated 1 [Source:HGNC Symbol;Acc:HGNC:7410]                                | 1.179742    |
| MTA2      | metastasis associated 1 family member 2 [Source:HGNC Symbol;Acc:HGNC:7411]                | 1.1813836   |
| MTERFD1   | mitochondrial transcription termination factor 3                                          | 1.2724098   |
| MTERFD2   | mitochondrial transcription termination factor 4                                          | 1.1652098   |
| MTERFD3   | mitochondrial transcription termination factor 2                                          | 1.3274268   |
| MTF2      | metal response element binding transcription factor 2 [Source:HGNC Symbol;Acc:HGNC:29535] | 1.3621438   |
| MTFP1     | mitochondrial fission process 1 [Source:HGNC Symbol;Acc:HGNC:26945]                       | -1.1728021  |
| MTHFR     | methylenetetrahydrofolate reductase (NAD(P)H) [Source:HGNC Symbol;Acc:HGNC:7436]          | 1.2096134   |
| MTIF2     | mitochondrial translational initiation factor 2 [Source:HGNC Symbol;Acc:HGNC:7441]        | 1.0948825   |
| MTIF3     | mitochondrial translational initiation factor 3 [Source:HGNC Symbol;Acc:HGNC:29788]       | 1.335104    |
| MTMR10    | myotubularin related protein 10 [Source:HGNC Symbol;Acc:HGNC:25999]                       | -1.0820256  |
| MTMR11    | myotubularin related protein 11 [Source:HGNC Symbol;Acc:HGNC:24307]                       | -1.2663863  |
| MTMR14    | myotubularin related protein 14 [Source:HGNC Symbol;Acc:HGNC:26190]                       | -1.34764825 |
| MTMR9LP   | myotubularin related protein 9-like, pseudogene [Source:HGNC Symbol;Acc:HGNC:27920]       | -1.37028625 |
| MTPAP     | mitochondrial poly(A) polymerase [Source:HGNC Symbol;Acc:HGNC:25532]                      | 1.2529621   |
| MTSS1     | metastasis suppressor 1 [Source:HGNC Symbol;Acc:HGNC:20443]                               | -1.922131   |
| MTX1      | metaxin 1 [Source:HGNC Symbol;Acc:HGNC:7504]                                              | -1.2283148  |
| MUC1      | mucin 1, cell surface associated [Source:HGNC Symbol;Acc:HGNC:7508]                       | -1.4117757  |
| MUC12     | mucin 12, cell surface associated [Source:HGNC Symbol;Acc:HGNC:7510]                      | -1.0558068  |
| MUC15     | mucin 15, cell surface associated [Source:HGNC Symbol;Acc:HGNC:14956]                     | 1.0891427   |
| MUC2      | mucin 2, oligomeric mucus/gel-forming [Source:HGNC Symbol;Acc:HGNC:7512]                  | -1.1619539  |
| MUC4      | mucin 4, cell surface associated [Source:HGNC Symbol;Acc:HGNC:7514]                       | -1.1270977  |
| MUC5AC    | mucin 5AC, oligomeric mucus/gel-forming [Source:HGNC Symbol;Acc:HGNC:7515]                | -1.1231213  |
| MUM1      | melanoma associated antigen (mutated) 1 [Source:HGNC Symbol;Acc:HGNC:29641]               | 1.18484055  |

|              |                                                                                           |            |
|--------------|-------------------------------------------------------------------------------------------|------------|
| MUS81        | MUS81 structure-specific endonuclease subunit [Source:HGNC Symbol;Acc:HGNC:29814]         | -1.1942885 |
| MUT          | methylmalonyl-CoA mutase [Source:HGNC Symbol;Acc:HGNC:7526]                               | 1.1682402  |
| MUTED        | biogenesis of lysosomal organelles complex 1 subunit 5                                    | 1.2328994  |
| MVK          | mevalonate kinase [Source:HGNC Symbol;Acc:HGNC:7530]                                      | 1.1684704  |
| MVP          | major vault protein [Source:HGNC Symbol;Acc:HGNC:7531]                                    | -1.1868476 |
| MX1          | MX dynamin like GTPase 1 [Source:HGNC Symbol;Acc:HGNC:7532]                               | -1.8759524 |
| MXD1         | MAX dimerization protein 1 [Source:HGNC Symbol;Acc:HGNC:6761]                             | -1.2648048 |
| MYADM        | myeloid associated differentiation marker [Source:HGNC Symbol;Acc:HGNC:7544]              | -1.1319844 |
| MYCL1        | v-myc avian myelocytomatosis viral oncogene lung carcinoma derived homolog                | -1.0625073 |
| MYCT1        | myc target 1 [Source:HGNC Symbol;Acc:HGNC:23172]                                          | 1.4600176  |
| MYD88        | myeloid differentiation primary response 88 [Source:HGNC Symbol;Acc:HGNC:7562]            | -1.1479787 |
| MYEOV        | myeloma overexpressed [Source:HGNC Symbol;Acc:HGNC:7563]                                  | -1.3450613 |
| MYH14        | myosin heavy chain 14 [Source:HGNC Symbol;Acc:HGNC:23212]                                 | -1.1081489 |
| MYH7B        | myosin heavy chain 7B [Source:HGNC Symbol;Acc:HGNC:15906]                                 | -1.0897846 |
| MYH9         | myosin heavy chain 9 [Source:HGNC Symbol;Acc:HGNC:7579]                                   | -1.1162379 |
| MYLK         | myosin light chain kinase [Source:HGNC Symbol;Acc:HGNC:7590]                              | -1.2029926 |
| MYLK2        | myosin light chain kinase 2 [Source:HGNC Symbol;Acc:HGNC:16243]                           | 1.3992043  |
| MYNN         | myoneurin [Source:HGNC Symbol;Acc:HGNC:14955]                                             | 1.1969945  |
| MYO10        | myosin X [Source:HGNC Symbol;Acc:HGNC:7593]                                               | -1.2484334 |
| MYO16        | myosin XVI [Source:HGNC Symbol;Acc:HGNC:29822]                                            | 1.113762   |
| MYO19        | myosin XIX [Source:HGNC Symbol;Acc:HGNC:26234]                                            | 1.3355765  |
| MYO1B        | myosin IB [Source:HGNC Symbol;Acc:HGNC:7596]                                              | 1.1828009  |
| MYO1D        | myosin ID [Source:HGNC Symbol;Acc:HGNC:7598]                                              | -1.1997279 |
| MYO3B        | myosin IIIB [Source:HGNC Symbol;Acc:HGNC:15576]                                           | 1.0970323  |
| MYO5B        | myosin VB [Source:HGNC Symbol;Acc:HGNC:7603]                                              | 1.1730849  |
| MYO9B        | myosin IXB [Source:HGNC Symbol;Acc:HGNC:7609]                                             | -1.1884043 |
| MYOZ3        | myozenin 3 [Source:HGNC Symbol;Acc:HGNC:18565]                                            | 1.1289408  |
| MYRIP        | myosin VIIA and Rab interacting protein [Source:HGNC Symbol;Acc:HGNC:19156]               | 1.3019615  |
| MZT1         | mitotic spindle organizing protein 1 [Source:HGNC Symbol;Acc:HGNC:33830]                  | 1.7463579  |
| N4BP2L1      | NEDD4 binding protein 2 like 1 [Source:HGNC Symbol;Acc:HGNC:25037]                        | -1.133873  |
| N4BP3        | NEDD4 binding protein 3 [Source:HGNC Symbol;Acc:HGNC:29852]                               | -1.2264096 |
| NAA16        | N(alpha)-acetyltransferase 16, NatA auxiliary subunit [Source:HGNC Symbol;Acc:HGNC:26164] | 1.3773995  |
| NAA30        | N(alpha)-acetyltransferase 30, NatC catalytic subunit [Source:HGNC Symbol;Acc:HGNC:19844] | 1.267436   |
| NAA35        | N(alpha)-acetyltransferase 35, NatC auxiliary subunit [Source:HGNC Symbol;Acc:HGNC:24340] | 1.1721123  |
| NAAA         | N-acylethanolamine acid amidase [Source:HGNC Symbol;Acc:HGNC:736]                         | -1.089135  |
| NAALAD2      | N-acetylated alpha-linked acidic dipeptidase 2 [Source:HGNC Symbol;Acc:HGNC:14526]        | 1.0945653  |
| NAALADL1     | N-acetylated alpha-linked acidic dipeptidase-like 1 [Source:HGNC Symbol;Acc:HGNC:23536]   | 1.1361859  |
| NAALADL2     | N-acetylated alpha-linked acidic dipeptidase-like 2 [Source:HGNC Symbol;Acc:HGNC:23219]   | -1.354432  |
| NAB1         | NGFI-A binding protein 1 [Source:HGNC Symbol;Acc:HGNC:7626]                               | -1.2834451 |
| NACAD        | NAC alpha domain containing [Source:HGNC Symbol;Acc:HGNC:22196]                           | -1.3009907 |
| NADK01       | NAD kinase 2, mitochondrial                                                               | 1.1158773  |
| NANOS2       | nanos C2HC-type zinc finger 2 [Source:HGNC Symbol;Acc:HGNC:23292]                         | 1.0899192  |
| NANS         | N-acetylneuraminase synthase [Source:HGNC Symbol;Acc:HGNC:19237]                          | -1.0974611 |
| NAP111       | nucleosome assembly protein 1 like 1 [Source:HGNC Symbol;Acc:HGNC:7637]                   | 1.4667228  |
| NAP1L6       | nucleosome assembly protein 1 like 6 [Source:HGNC Symbol;Acc:HGNC:31706]                  | 1.1447695  |
| NAPA         | NSF attachment protein alpha [Source:HGNC Symbol;Acc:HGNC:7641]                           | 1.3081883  |
| NARS         | asparaginyl-tRNA synthetase [Source:HGNC Symbol;Acc:HGNC:7643]                            | 1.3537246  |
| NAT8         | N-acetyltransferase 8 (putative) [Source:HGNC Symbol;Acc:HGNC:18069]                      | 1.1370331  |
| NAT8L        | N-acetyltransferase 8 like [Source:HGNC Symbol;Acc:HGNC:26742]                            | -1.574615  |
| NAT9         | N-acetyltransferase 9 (putative) [Source:HGNC Symbol;Acc:HGNC:23133]                      | -1.0752435 |
| NAV2         | neuron navigator 2 [Source:HGNC Symbol;Acc:HGNC:15997]                                    | -1.7710113 |
| NAV3         | neuron navigator 3 [Source:HGNC Symbol;Acc:HGNC:15998]                                    | -1.1614208 |
| NCAM2        | neural cell adhesion molecule 2 [Source:HGNC Symbol;Acc:HGNC:7657]                        | 1.0656855  |
| NCDN         | neurochondrin [Source:HGNC Symbol;Acc:HGNC:17597]                                         | 1.3735135  |
| NCF4         | neutrophil cytosolic factor 4 [Source:HGNC Symbol;Acc:HGNC:7662]                          | -1.5492157 |
| NCK2         | NCK adaptor protein 2 [Source:HGNC Symbol;Acc:HGNC:7665]                                  | -1.1271875 |
| NCKAP1L      | NCK associated protein 1 like [Source:HGNC Symbol;Acc:HGNC:4862]                          | -1.1438162 |
| NCOA7        | nuclear receptor coactivator 7 [Source:HGNC Symbol;Acc:HGNC:21081]                        | -4.234848  |
| NCOR2        | nuclear receptor corepressor 2 [Source:HGNC Symbol;Acc:HGNC:7673]                         | 1.1294395  |
| NCR1         | natural cytotoxicity triggering receptor 1 [Source:HGNC Symbol;Acc:HGNC:6731]             | 1.1030093  |
| NCR2         | natural cytotoxicity triggering receptor 2 [Source:HGNC Symbol;Acc:HGNC:6732]             | -1.1105155 |
| NCR3         | natural cytotoxicity triggering receptor 3 [Source:HGNC Symbol;Acc:HGNC:19077]            | -1.0804781 |
| NCR3LG1      | natural killer cell cytotoxicity receptor 3 ligand 1                                      | -1.0660846 |
| NCRNA00029   | long intergenic non-protein coding RNA 29                                                 | -1.1239451 |
| NCRNA00087   | small integral membrane protein 10 like 2B                                                | -1.1497282 |
| NCRNA00152   | cytoskeleton regulator RNA                                                                | 1.1411177  |
| NCRNA00157   | CHODL antisense RNA 1                                                                     | 1.0504012  |
| NCRNA00158   | long intergenic non-protein coding RNA 158                                                | 1.1174748  |
| NCRNA00160   | long intergenic non-protein coding RNA 160                                                | -1.1556267 |
| NCRNA00167   | long intergenic non-protein coding RNA 167                                                | 1.1194732  |
| NCRNA00219   | EPB41L4A antisense RNA 1                                                                  | 1.0680128  |
| NCRNA00238   | long intergenic non-protein coding RNA 238                                                | 1.1053103  |
| NCRNA00241   | AGPAT4 intronic transcript 1                                                              | -1.3924394 |
| NCRNA00244   | long intergenic non-protein coding RNA 244                                                | 1.092499   |
| NCRNA00251   | long intergenic non-protein coding RNA 251                                                | 1.1129433  |
| NCRNA00258   | GRIK1 antisense RNA 2                                                                     | 1.1015751  |
| NCRNA00266-1 | long intergenic non-protein coding RNA 266-1                                              | 1.0630977  |
| NCRNA00273   | long intergenic non-protein coding RNA 273                                                | -1.1872648 |
| NCRNA00277   | Ewing sarcoma associated transcript 1                                                     | 1.1369424  |
| NCRNA00282   | long intergenic non-protein coding RNA 282                                                | 1.1505791  |
| NCRNA00288   | KIRREL3 antisense RNA 3                                                                   | -1.1247498 |
| NCRNA00304   | long intergenic non-protein coding RNA 304                                                | 1.1437521  |
| NCRNA00306   | MIR7-3 host gene                                                                          | 1.1337112  |
| NCRNA00311   | long intergenic non-protein coding RNA 311                                                | -1.0924194 |
| NCRNA00314   | long intergenic non-protein coding RNA 314                                                | 1.089246   |
| NCRNA00317   | long intergenic non-protein coding RNA 317                                                | -1.2388884 |

|            |                                                                                                                        |              |
|------------|------------------------------------------------------------------------------------------------------------------------|--------------|
| NCRNA00324 | long intergenic non-protein coding RNA 324                                                                             | 1.1205256    |
| NCRNA00338 | small nucleolar RNA host gene 20                                                                                       | 1.1738718    |
| NCRNA00339 | long intergenic non-protein coding RNA 339                                                                             | 1.2126217    |
| NCSTN      | nicastrin [Source:HGNC Symbol;Acc:HGNC:17091]                                                                          | -1.2289566   |
| ND3        | mitochondrially encoded NADH:ubiquinone oxidoreductase core subunit 3                                                  | -1.1356391   |
| ND80       | NDC80, kinetochore complex component [Source:HGNC Symbol;Acc:HGNC:16909]                                               | 1.433804     |
| NDEL1      | nude neurodevelopment protein 1 like 1 [Source:HGNC Symbol;Acc:HGNC:17620]                                             | -1.2389675   |
| NDNF       | neuron derived neurotrophic factor [Source:HGNC Symbol;Acc:HGNC:26256]                                                 | 1.0804515    |
| NDST1      | N-deacetylase and N-sulfotransferase 1 [Source:HGNC Symbol;Acc:HGNC:7680]                                              | -1.300938    |
| NDUFA10    | NADH:ubiquinone oxidoreductase subunit A10 [Source:HGNC Symbol;Acc:HGNC:7684]                                          | -1.1831264   |
| NDUFA12    | NADH:ubiquinone oxidoreductase subunit A12 [Source:HGNC Symbol;Acc:HGNC:23987]                                         | -1.1322144   |
| NDUFA4L2   | NDUFA4, mitochondrial complex associated like 2 [Source:HGNC Symbol;Acc:HGNC:29836]                                    | 1.1521494    |
| NDUFA7     | NADH:ubiquinone oxidoreductase subunit A7 [Source:HGNC Symbol;Acc:HGNC:7691]                                           | -1.1163362   |
| NDUFA8     | NADH:ubiquinone oxidoreductase subunit A8 [Source:HGNC Symbol;Acc:HGNC:7692]                                           | 1.069227     |
| NDUFA9     | NADH:ubiquinone oxidoreductase subunit A9 [Source:HGNC Symbol;Acc:HGNC:7693]                                           | -1.1948994   |
| NDUFAB1    | NADH:ubiquinone oxidoreductase subunit AB1 [Source:HGNC Symbol;Acc:HGNC:7694]                                          | 1.0880563    |
| NDUFAF2    | NADH:ubiquinone oxidoreductase complex assembly factor 2 [Source:HGNC Symbol;Acc:HGNC:28086]                           | -1.1901318   |
| NDUFAF4    | NADH:ubiquinone oxidoreductase complex assembly factor 4 [Source:HGNC Symbol;Acc:HGNC:21034]                           | 1.1776307    |
| NDUF88     | NADH:ubiquinone oxidoreductase subunit B8 [Source:HGNC Symbol;Acc:HGNC:7703]                                           | -1.1195259   |
| NDUFC1     | NADH:ubiquinone oxidoreductase subunit C1 [Source:HGNC Symbol;Acc:HGNC:7705]                                           | -1.2224678   |
| NDUFC2     | NADH:ubiquinone oxidoreductase subunit C2 [Source:HGNC Symbol;Acc:HGNC:7706]                                           | 1.0590535    |
| NEBL       | nebullette [Source:HGNC Symbol;Acc:HGNC:16932]                                                                         | 1.1123013    |
| NECAB2     | N-terminal EF-hand calcium binding protein 2 [Source:HGNC Symbol;Acc:HGNC:23746]                                       | -1.0600048   |
| NECAP2     | NECAP endocytosis associated 2 [Source:HGNC Symbol;Acc:HGNC:25528]                                                     | -1.5175261   |
| NEDD4L     | cell expressed, developmentally down-regulated 4-like, E3 ubiquitin protein ligase [Source:HGNC Symbol;Acc:HGNC:25162] | -1.2493476   |
| NEDD9      | neuronal precursor cell expressed, developmentally down-regulated 9 [Source:HGNC Symbol;Acc:HGNC:773]                  | -1.57465925  |
| NEK6       | NIMA related kinase 6 [Source:HGNC Symbol;Acc:HGNC:7749]                                                               | 1.13452955   |
| NEK7       | NIMA related kinase 7 [Source:HGNC Symbol;Acc:HGNC:13386]                                                              | 1.1503863    |
| NES        | nestin [Source:HGNC Symbol;Acc:HGNC:7756]                                                                              | 1.3966322    |
| NET1       | neuroepithelial cell transforming 1 [Source:HGNC Symbol;Acc:HGNC:14592]                                                | 1.3341147    |
| NEURL      | neuralized E3 ubiquitin protein ligase 1                                                                               | -1.093151    |
| NEURL1B    | neuralized E3 ubiquitin protein ligase 1B [Source:HGNC Symbol;Acc:HGNC:35422]                                          | 1.1753443    |
| NEURL3     | neuralized E3 ubiquitin protein ligase 3 [Source:HGNC Symbol;Acc:HGNC:25162]                                           | -2.2733395   |
| NEUROG3    | neurogenin 3 [Source:HGNC Symbol;Acc:HGNC:13806]                                                                       | -1.0974045   |
| NF2        | neurofibromin 2 [Source:HGNC Symbol;Acc:HGNC:7773]                                                                     | 1.2619874    |
| NFATC1     | nuclear factor of activated T-cells 1 [Source:HGNC Symbol;Acc:HGNC:7775]                                               | -1.5271399   |
| NFATC2IP   | nuclear factor of activated T-cells 2 interacting protein [Source:HGNC Symbol;Acc:HGNC:25906]                          | -1.2694521   |
| NFE2L1     | nuclear factor, erythroid 2 like 1 [Source:HGNC Symbol;Acc:HGNC:7781]                                                  | -1.3561966   |
| NFIA       | nuclear factor I A [Source:HGNC Symbol;Acc:HGNC:7784]                                                                  | 1.7764044    |
| NFIB       | nuclear factor I B [Source:HGNC Symbol;Acc:HGNC:7785]                                                                  | 1.6210234    |
| NFIC       | nuclear factor I C [Source:HGNC Symbol;Acc:HGNC:7786]                                                                  | 1.1761032    |
| NFIL3      | nuclear factor, interleukin 3 regulated [Source:HGNC Symbol;Acc:HGNC:7787]                                             | -1.2569853   |
| NFIX       | nuclear factor I X [Source:HGNC Symbol;Acc:HGNC:7788]                                                                  | -1.2861302   |
| NFKB1      | nuclear factor kappa B subunit 1 [Source:HGNC Symbol;Acc:HGNC:7794]                                                    | -2.8601785   |
| NFKB2      | nuclear factor kappa B subunit 2 [Source:HGNC Symbol;Acc:HGNC:7795]                                                    | -3.6775794   |
| NFKBIA     | NFKB inhibitor alpha [Source:HGNC Symbol;Acc:HGNC:7797]                                                                | -10.365542   |
| NFKBIB     | NFKB inhibitor beta [Source:HGNC Symbol;Acc:HGNC:7798]                                                                 | -1.8789163   |
| NFKBIE     | NFKB inhibitor epsilon [Source:HGNC Symbol;Acc:HGNC:7799]                                                              | -4.569497    |
| NFS1       | NFS1 cysteine desulfurase [Source:HGNC Symbol;Acc:HGNC:15910]                                                          | 1.0615354    |
| NFXL1      | nuclear transcription factor, X-box binding like 1 [Source:HGNC Symbol;Acc:HGNC:18726]                                 | -1.2884429   |
| NFYA       | nuclear transcription factor Y subunit alpha [Source:HGNC Symbol;Acc:HGNC:7804]                                        | 1.2024946    |
| NFYC       | nuclear transcription factor Y subunit gamma [Source:HGNC Symbol;Acc:HGNC:7806]                                        | -1.183952677 |
| NHLH2      | nescent helix-loop-helix 2 [Source:HGNC Symbol;Acc:HGNC:7818]                                                          | -1.1875988   |
| NHS        | NHS actin remodeling regulator [Source:HGNC Symbol;Acc:HGNC:7820]                                                      | 1.1015651    |
| NHSL1      | NHS like 1 [Source:HGNC Symbol;Acc:HGNC:21021]                                                                         | -1.1445942   |
| NID2       | nidogen 2 [Source:HGNC Symbol;Acc:HGNC:13389]                                                                          | -1.3058165   |
| NIF3L1     | NGG1 interacting factor 3 like 1 [Source:HGNC Symbol;Acc:HGNC:13390]                                                   | 1.1997259    |
| NINJ1      | ninjurin 1 [Source:HGNC Symbol;Acc:HGNC:7824]                                                                          | -2.1408255   |
| NINL       | ninein like [Source:HGNC Symbol;Acc:HGNC:29163]                                                                        | 1.205701     |
| NIPA1      | non imprinted in Prader-Willi/Angelman syndrome 1 [Source:HGNC Symbol;Acc:HGNC:17043]                                  | -1.3232436   |
| NIPAL3     | NIPA like domain containing 3 [Source:HGNC Symbol;Acc:HGNC:25233]                                                      | -1.1353283   |
| NIPAL4     | NIPA like domain containing 4 [Source:HGNC Symbol;Acc:HGNC:28018]                                                      | -1.2027171   |
| NIPSNAP3A  | nipsnap homolog 3A [Source:HGNC Symbol;Acc:HGNC:23619]                                                                 | -1.2086691   |
| NKD2       | naked cuticle homolog 2 [Source:HGNC Symbol;Acc:HGNC:17046]                                                            | -2.2502365   |
| NKIRAS1    | NFKB inhibitor interacting Ras like 1 [Source:HGNC Symbol;Acc:HGNC:17899]                                              | 1.1220745    |
| NKRF       | NFKB repressing factor [Source:HGNC Symbol;Acc:HGNC:19374]                                                             | 1.2072194    |
| NKX3-1     | NK3 homeobox 1 [Source:HGNC Symbol;Acc:HGNC:7838]                                                                      | -1.7671115   |
| NLGN2      | neuroligin 2 [Source:HGNC Symbol;Acc:HGNC:14290]                                                                       | 1.2699687    |
| NLGN4X     | neuroligin 4, X-linked [Source:HGNC Symbol;Acc:HGNC:14287]                                                             | -1.0752696   |
| NLRC3      | NLR family CARD domain containing 3 [Source:HGNC Symbol;Acc:HGNC:29889]                                                | 1.6299596    |
| NLRC4      | NLR family CARD domain containing 4 [Source:HGNC Symbol;Acc:HGNC:16412]                                                | 1.0833808    |
| NLRC5      | NLR family CARD domain containing 5 [Source:HGNC Symbol;Acc:HGNC:29933]                                                | -1.208081    |
| NLRP1      | NLR family pyrin domain containing 1 [Source:HGNC Symbol;Acc:HGNC:14374]                                               | -1.1395012   |
| NLRP12     | NLR family pyrin domain containing 12 [Source:HGNC Symbol;Acc:HGNC:22938]                                              | 1.3526211    |
| NLRP13     | NLR family pyrin domain containing 13 [Source:HGNC Symbol;Acc:HGNC:22937]                                              | 1.0932368    |
| NLRP3      | NLR family pyrin domain containing 3 [Source:HGNC Symbol;Acc:HGNC:16400]                                               | -1.5980512   |
| NLRP5      | NLR family pyrin domain containing 5 [Source:HGNC Symbol;Acc:HGNC:21269]                                               | -1.2770007   |
| NME4       | NME/NM23 nucleoside diphosphate kinase 4 [Source:HGNC Symbol;Acc:HGNC:7852]                                            | 1.1492362    |
| NME6       | NME/NM23 nucleoside diphosphate kinase 6 [Source:HGNC Symbol;Acc:HGNC:20567]                                           | -1.224104    |
| NMNAT1     | nicotinamide nucleotide adenyltransferase 1 [Source:HGNC Symbol;Acc:HGNC:17877]                                        | -1.0642712   |
| NMUR2      | neuromedin U receptor 2 [Source:HGNC Symbol;Acc:HGNC:16454]                                                            | -1.0657262   |
| NOD1       | nucleotide binding oligomerization domain containing 1 [Source:HGNC Symbol;Acc:HGNC:16390]                             | -1.1250986   |
| NOD2       | nucleotide binding oligomerization domain containing 2 [Source:HGNC Symbol;Acc:HGNC:5331]                              | -1.5108893   |
| NOG        | noggin [Source:HGNC Symbol;Acc:HGNC:7866]                                                                              | 1.353384     |
| NOL10      | nucleolar protein 10 [Source:HGNC Symbol;Acc:HGNC:25862]                                                               | 1.1873175    |
| NOL11      | nucleolar protein 11 [Source:HGNC Symbol;Acc:HGNC:24557]                                                               | 1.2506723    |

|          |                                                                                                   |             |
|----------|---------------------------------------------------------------------------------------------------|-------------|
| NOMO1    | NODAL modulator 1 [Source:HGNC Symbol;Acc:HGNC:30060]                                             | -1.1300565  |
| NOP10    | NOP10 ribonucleoprotein [Source:HGNC Symbol;Acc:HGNC:14378]                                       | -1.0557715  |
| NOP56    | NOP56 ribonucleoprotein [Source:HGNC Symbol;Acc:HGNC:15911]                                       | 1.1831043   |
| NOS3     | nitric oxide synthase 3 [Source:HGNC Symbol;Acc:HGNC:7876]                                        | 1.6671364   |
| NOTCH2   | notch 2 [Source:HGNC Symbol;Acc:HGNC:7882]                                                        | -1.6685209  |
| NOTCH2NL | notch 2 N-terminal like [Source:HGNC Symbol;Acc:HGNC:31862]                                       | -1.3911723  |
| NOV      | nephroblastoma overexpressed [Source:HGNC Symbol;Acc:HGNC:7885]                                   | -1.3349334  |
| NOX4     | NADPH oxidase 4 [Source:HGNC Symbol;Acc:HGNC:7891]                                                | 1.5578209   |
| NPAS2    | neuronal PAS domain protein 2 [Source:HGNC Symbol;Acc:HGNC:7895]                                  | 1.2163064   |
| NPAT     | nuclear protein, coactivator of histone transcription [Source:HGNC Symbol;Acc:HGNC:7896]          | 1.294044    |
| NPBWR1   | neuropeptides B/W receptor 1 [Source:HGNC Symbol;Acc:HGNC:4522]                                   | -1.1682034  |
| NPC2     | NPC intracellular cholesterol transporter 2 [Source:HGNC Symbol;Acc:HGNC:14537]                   | -1.1062347  |
| NPDC1    | neural proliferation, differentiation and control 1 [Source:HGNC Symbol;Acc:HGNC:7899]            | 1.2665823   |
| NPFFR2   | neuropeptide FF receptor 2 [Source:HGNC Symbol;Acc:HGNC:4525]                                     | -1.0648376  |
| NPILP3   | nuclear pore complex interacting protein family member B3                                         | 1.0685937   |
| NPL      | N-acetylneuraminase pyruvate lyase [Source:HGNC Symbol;Acc:HGNC:16781]                            | -1.1143938  |
| NPLOC4   | NPL4 homolog, ubiquitin recognition factor [Source:HGNC Symbol;Acc:HGNC:18261]                    | -1.3084962  |
| NPM1     | nucleophosmin [Source:HGNC Symbol;Acc:HGNC:7910]                                                  | 1.3983469   |
| NPR2     | natriuretic peptide receptor 2 [Source:HGNC Symbol;Acc:HGNC:7944]                                 | 1.1408908   |
| NPY1R    | neuropeptide Y receptor Y1 [Source:HGNC Symbol;Acc:HGNC:7956]                                     | 1.0789124   |
| NR1D2    | nuclear receptor subfamily 1 group D member 2 [Source:HGNC Symbol;Acc:HGNC:7963]                  | 1.1156998   |
| NR1I2    | nuclear receptor subfamily 1 group I member 2 [Source:HGNC Symbol;Acc:HGNC:7968]                  | 1.0594279   |
| NR1I3    | nuclear receptor subfamily 1 group I member 3 [Source:HGNC Symbol;Acc:HGNC:7969]                  | 1.0902568   |
| NR2F2    | nuclear receptor subfamily 2 group F member 2 [Source:HGNC Symbol;Acc:HGNC:7976]                  | 1.9012372   |
| NR2F6    | nuclear receptor subfamily 2 group F member 6 [Source:HGNC Symbol;Acc:HGNC:7977]                  | 1.3242253   |
| NR3C1    | nuclear receptor subfamily 3 group C member 1 [Source:HGNC Symbol;Acc:HGNC:7978]                  | 1.408674    |
| NR3C2    | nuclear receptor subfamily 3 group C member 2 [Source:HGNC Symbol;Acc:HGNC:7979]                  | 1.5998374   |
| NR4A3    | nuclear receptor subfamily 4 group A member 3 [Source:HGNC Symbol;Acc:HGNC:7982]                  | -2.3759637  |
| NRS5A2   | nuclear receptor subfamily 5 group A member 2 [Source:HGNC Symbol;Acc:HGNC:7984]                  | 1.6139132   |
| NRG1     | neuregulin 1 [Source:HGNC Symbol;Acc:HGNC:7997]                                                   | -1.27745355 |
| NRIP2    | nuclear receptor interacting protein 2 [Source:HGNC Symbol;Acc:HGNC:23078]                        | -1.1722987  |
| NRK      | Nik related kinase [Source:HGNC Symbol;Acc:HGNC:25391]                                            | 1.0912156   |
| NRN1     | neuritin 1 [Source:HGNC Symbol;Acc:HGNC:17972]                                                    | 1.1884468   |
| NRP1     | neuropilin 1 [Source:HGNC Symbol;Acc:HGNC:8004]                                                   | 1.5257566   |
| NRP2     | neuropilin 2 [Source:HGNC Symbol;Acc:HGNC:8005]                                                   | -1.275035   |
| NRXN1    | neurexin 1 [Source:HGNC Symbol;Acc:HGNC:8008]                                                     | 1.0697949   |
| NSA2     | NSA2, ribosome biogenesis homolog [Source:HGNC Symbol;Acc:HGNC:30728]                             | 1.3082967   |
| NSD1     | nuclear receptor binding SET domain protein 1 [Source:HGNC Symbol;Acc:HGNC:14234]                 | 1.1261767   |
| NSDHL    | NAD(P) dependent steroid dehydrogenase-like [Source:HGNC Symbol;Acc:HGNC:13398]                   | 1.1661164   |
| NSUN3    | NOP2/Sun RNA methyltransferase family member 3 [Source:HGNC Symbol;Acc:HGNC:26208]                | 1.1336774   |
| NSUN5    | NOP2/Sun RNA methyltransferase family member 5 [Source:HGNC Symbol;Acc:HGNC:16385]                | 1.1397355   |
| NTSDC4   | 5'-nucleotidase domain containing 4 [Source:HGNC Symbol;Acc:HGNC:27678]                           | 1.1212589   |
| NTHL1    | nth like DNA glycosylase 1 [Source:HGNC Symbol;Acc:HGNC:8028]                                     | 1.1211994   |
| NTN1     | netrin 1 [Source:HGNC Symbol;Acc:HGNC:8029]                                                       | -1.4923034  |
| NTN4     | netrin 4 [Source:HGNC Symbol;Acc:HGNC:13658]                                                      | 1.381472    |
| NTNG2    | netrin G2 [Source:HGNC Symbol;Acc:HGNC:14288]                                                     | -1.0913815  |
| NTSR1    | neurotensin receptor 1 (high affinity) [Source:HGNC Symbol;Acc:HGNC:8039]                         | 1.1732681   |
| NUAK1    | NUAK family kinase 1 [Source:HGNC Symbol;Acc:HGNC:14311]                                          | 1.4934733   |
| NUAK2    | NUAK family kinase 2 [Source:HGNC Symbol;Acc:HGNC:29558]                                          | -9.072099   |
| NUCKS1   | nuclear casein kinase and cyclin dependent kinase substrate 1 [Source:HGNC Symbol;Acc:HGNC:29923] | 1.1896721   |
| NUDCD2   | NudC domain containing 2 [Source:HGNC Symbol;Acc:HGNC:30535]                                      | 1.1813283   |
| NUDT10   | nudix hydrolase 10 [Source:HGNC Symbol;Acc:HGNC:17621]                                            | -1.1273559  |
| NUDT16   | nudix hydrolase 16 [Source:HGNC Symbol;Acc:HGNC:26442]                                            | -1.1129522  |
| NUDT21   | nudix hydrolase 21 [Source:HGNC Symbol;Acc:HGNC:13870]                                            | 1.5302132   |
| NUDT3    | nudix hydrolase 3 [Source:HGNC Symbol;Acc:HGNC:8050]                                              | -1.2032771  |
| NUDT6    | nudix hydrolase 6 [Source:HGNC Symbol;Acc:HGNC:8053]                                              | 1.4160154   |
| NUMA1    | nuclear mitotic apparatus protein 1 [Source:HGNC Symbol;Acc:HGNC:8059]                            | 1.1658032   |
| NUMB     | NUMB like, endocytic adaptor protein [Source:HGNC Symbol;Acc:HGNC:8061]                           | -1.1770153  |
| NUP205   | nucleoporin 205 [Source:HGNC Symbol;Acc:HGNC:18658]                                               | 1.3083394   |
| NUP62    | nucleoporin 62 [Source:HGNC Symbol;Acc:HGNC:8066]                                                 | -1.46466225 |
| NUTF2    | nuclear transport factor 2 [Source:HGNC Symbol;Acc:HGNC:13722]                                    | 1.1316485   |
| NXF1     | nuclear RNA export factor 1 [Source:HGNC Symbol;Acc:HGNC:8071]                                    | -1.2153399  |
| NXPH4    | neurexophilin 4 [Source:HGNC Symbol;Acc:HGNC:8078]                                                | -1.1428909  |
| NYNRN    | NYN domain and retroviral integrase containing [Source:HGNC Symbol;Acc:HGNC:20165]                | 1.18795335  |
| O3FAR1   | free fatty acid receptor 4                                                                        | -1.1809589  |
| OAF      | out at first homolog [Source:HGNC Symbol;Acc:HGNC:28752]                                          | 1.177142    |
| OAS2     | 2'-5'-oligoadenylate synthetase 2 [Source:HGNC Symbol;Acc:HGNC:8087]                              | -1.15461685 |
| OAS3     | 2'-5'-oligoadenylate synthetase 3 [Source:HGNC Symbol;Acc:HGNC:8088]                              | -1.29767705 |
| OASL     | 2'-5'-oligoadenylate synthetase like [Source:HGNC Symbol;Acc:HGNC:8090]                           | -1.2026701  |
| OBFC1    | oligonucleotide/oligosaccharide binding fold containing 1 [Source:HGNC Symbol;Acc:HGNC:26200]     | -1.2197133  |
| OBFC2A   | nucleic acid binding protein 1                                                                    | -1.3853759  |
| OBFC2B   | nucleic acid binding protein 2                                                                    | 1.2630414   |
| OCLN     | occludin [Source:HGNC Symbol;Acc:HGNC:8104]                                                       | 1.0882439   |
| OCM2     | oncomodulin 2 [Source:HGNC Symbol;Acc:HGNC:34396]                                                 | -1.1395899  |
| ODF2     | outer dense fiber of sperm tails 2 [Source:HGNC Symbol;Acc:HGNC:8114]                             | -1.2228826  |
| ODF2L    | outer dense fiber of sperm tails 2 like [Source:HGNC Symbol;Acc:HGNC:29225]                       | 1.0953338   |
| ODF3     | outer dense fiber of sperm tails 3 [Source:HGNC Symbol;Acc:HGNC:19905]                            | -1.1364433  |
| ODF3L2   | outer dense fiber of sperm tails 3 like 2 [Source:HGNC Symbol;Acc:HGNC:26841]                     | -1.3302294  |
| ODF4     | outer dense fiber of sperm tails 4 [Source:HGNC Symbol;Acc:HGNC:19056]                            | -1.1083764  |
| ODZ3     | teneurin transmembrane protein 3                                                                  | -1.1195648  |
| OGFR     | opioid growth factor receptor [Source:HGNC Symbol;Acc:HGNC:15768]                                 | -1.4049805  |
| OGFRL1   | opioid growth factor receptor like 1 [Source:HGNC Symbol;Acc:HGNC:21378]                          | -1.151595   |
| OLFML2A  | olfactomedin like 2A [Source:HGNC Symbol;Acc:HGNC:27270]                                          | -1.168296   |
| OLFML2B  | olfactomedin like 2B [Source:HGNC Symbol;Acc:HGNC:24558]                                          | -1.1166612  |
| OLIG1    | oligodendrocyte transcription factor 1 [Source:HGNC Symbol;Acc:HGNC:16983]                        | 1.1477231   |
| OLIG3    | oligodendrocyte transcription factor 3 [Source:HGNC Symbol;Acc:HGNC:18003]                        | 1.0989375   |

|          |                                                                                                      |             |
|----------|------------------------------------------------------------------------------------------------------|-------------|
| ONECUT2  | one cut homeobox 2 [Source:HGNC Symbol;Acc:HGNC:8139]                                                | -1.131913   |
| OOSP1    | oocyte secreted protein 1, pseudogene [Source:HGNC Symbol;Acc:HGNC:49233]                            | -1.0635871  |
| OPCML    | opioid binding protein/cell adhesion molecule like [Source:HGNC Symbol;Acc:HGNC:8143]                | 1.0586793   |
| OPN15W   | opsin 1 (cone pigments), short-wave-sensitive [Source:HGNC Symbol;Acc:HGNC:1012]                     | -1.1097462  |
| OPRL1    | opioid related nociceptin receptor 1 [Source:HGNC Symbol;Acc:HGNC:8155]                              | -1.125468   |
| OPTN     | optineurin [Source:HGNC Symbol;Acc:HGNC:17142]                                                       | -1.7759129  |
| OR10G2   | olfactory receptor family 10 subfamily G member 2 [Source:HGNC Symbol;Acc:HGNC:8170]                 | -1.4409568  |
| OR10H1   | olfactory receptor family 10 subfamily H member 1 [Source:HGNC Symbol;Acc:HGNC:8172]                 | -1.2127231  |
| OR10H4   | olfactory receptor family 10 subfamily H member 4 [Source:HGNC Symbol;Acc:HGNC:15388]                | -1.1180928  |
| OR10H5   | olfactory receptor family 10 subfamily H member 5 [Source:HGNC Symbol;Acc:HGNC:15389]                | 1.0999346   |
| OR10J5   | olfactory receptor family 10 subfamily J member 5 [Source:HGNC Symbol;Acc:HGNC:14993]                | -1.099858   |
| OR11H12  | olfactory receptor family 11 subfamily H member 12 [Source:HGNC Symbol;Acc:HGNC:30738]               | -1.0969833  |
| OR13C4   | olfactory receptor family 13 subfamily C member 4 [Source:HGNC Symbol;Acc:HGNC:14722]                | 1.095171    |
| OR13C8   | olfactory receptor family 13 subfamily C member 8 [Source:HGNC Symbol;Acc:HGNC:15103]                | 1.1107129   |
| OR13D1   | olfactory receptor family 13 subfamily D member 1 [Source:HGNC Symbol;Acc:HGNC:14695]                | -1.1652844  |
| OR13H1   | olfactory receptor family 13 subfamily H member 1 [Source:HGNC Symbol;Acc:HGNC:14755]                | -1.3002077  |
| OR14I1   | olfactory receptor family 14 subfamily I member 1 [Source:HGNC Symbol;Acc:HGNC:19575]                | 1.0775034   |
| OR14J1   | olfactory receptor family 14 subfamily J member 1 [Source:HGNC Symbol;Acc:HGNC:13971]                | 1.1773582   |
| OR1A1    | olfactory receptor family 1 subfamily A member 1 [Source:HGNC Symbol;Acc:HGNC:8179]                  | 1.0743848   |
| OR1F2P   | olfactory receptor family 1 subfamily F member 2 pseudogene [Source:HGNC Symbol;Acc:HGNC:8196]       | -1.0862782  |
| OR1J4    | olfactory receptor family 1 subfamily J member 4 [Source:HGNC Symbol;Acc:HGNC:8211]                  | -1.2237248  |
| OR1N2    | olfactory receptor family 1 subfamily N member 2 [Source:HGNC Symbol;Acc:HGNC:15111]                 | -1.0834854  |
| OR2A12   | olfactory receptor family 2 subfamily A member 12 [Source:HGNC Symbol;Acc:HGNC:15082]                | 1.125259    |
| OR2A20P  | olfactory receptor family 2 subfamily A member 20 pseudogene [Source:HGNC Symbol;Acc:HGNC:15413]     | -1.1669725  |
| OR2A25   | olfactory receptor family 2 subfamily A member 25 [Source:HGNC Symbol;Acc:HGNC:19562]                | -1.1627123  |
| OR2A9P   | olfactory receptor family 2 subfamily A member 9 pseudogene [Source:HGNC Symbol;Acc:HGNC:8236]       | -1.0777371  |
| OR2AG2   | olfactory receptor family 2 subfamily AG member 2 [Source:HGNC Symbol;Acc:HGNC:15143]                | -1.1758953  |
| OR2C3    | olfactory receptor family 2 subfamily C member 3 [Source:HGNC Symbol;Acc:HGNC:15005]                 | -1.075338   |
| OR2H1    | olfactory receptor family 2 subfamily H member 1 [Source:HGNC Symbol;Acc:HGNC:8252]                  | 1.0919843   |
| OR2J3    | olfactory receptor family 2 subfamily J member 3 [Source:HGNC Symbol;Acc:HGNC:8261]                  | 1.1759146   |
| OR2L8    | olfactory receptor family 2 subfamily L member 8 (gene/pseudogene) [Source:HGNC Symbol;Acc:HGNC:151] | -1.0578525  |
| OR2M3    | olfactory receptor family 2 subfamily M member 3 [Source:HGNC Symbol;Acc:HGNC:8269]                  | 1.0811707   |
| OR2T27   | olfactory receptor family 2 subfamily T member 27 [Source:HGNC Symbol;Acc:HGNC:31252]                | -1.1447225  |
| OR2T4    | olfactory receptor family 2 subfamily T member 4 [Source:HGNC Symbol;Acc:HGNC:15016]                 | 1.0820304   |
| OR2W3    | olfactory receptor family 2 subfamily W member 3 [Source:HGNC Symbol;Acc:HGNC:15021]                 | -1.0579541  |
| OR2Y1    | olfactory receptor family 2 subfamily Y member 1 [Source:HGNC Symbol;Acc:HGNC:14837]                 | 1.159105    |
| OR4A15   | olfactory receptor family 4 subfamily A member 15 [Source:HGNC Symbol;Acc:HGNC:15152]                | -1.1634454  |
| OR4A47   | olfactory receptor family 4 subfamily A member 47 [Source:HGNC Symbol;Acc:HGNC:31266]                | 1.1397042   |
| OR4D10   | olfactory receptor family 4 subfamily D member 10 [Source:HGNC Symbol;Acc:HGNC:15173]                | -1.0963695  |
| OR4D11   | olfactory receptor family 4 subfamily D member 11 [Source:HGNC Symbol;Acc:HGNC:15174]                | -1.1159046  |
| OR4D2    | olfactory receptor family 4 subfamily D member 2 [Source:HGNC Symbol;Acc:HGNC:8294]                  | 1.1204609   |
| OR4D6    | olfactory receptor family 4 subfamily D member 6 [Source:HGNC Symbol;Acc:HGNC:15175]                 | -1.1604722  |
| OR4D9    | olfactory receptor family 4 subfamily D member 9 [Source:HGNC Symbol;Acc:HGNC:15178]                 | 1.1283741   |
| OR4F21   | olfactory receptor family 4 subfamily F member 21 [Source:HGNC Symbol;Acc:HGNC:19583]                | 1.082412    |
| OR4K13   | olfactory receptor family 4 subfamily K member 13 [Source:HGNC Symbol;Acc:HGNC:15351]                | 1.0750698   |
| OR4K17   | olfactory receptor family 4 subfamily K member 17 [Source:HGNC Symbol;Acc:HGNC:15355]                | 1.101651    |
| OR4N2    | olfactory receptor family 4 subfamily N member 2 [Source:HGNC Symbol;Acc:HGNC:14742]                 | 1.0925088   |
| OR4N3P   | olfactory receptor family 4 subfamily N member 3 pseudogene [Source:HGNC Symbol;Acc:HGNC:15374]      | 1.0756279   |
| OR51B2   | olfactory receptor family 51 subfamily B member 2 (gene/pseudogene) [Source:HGNC Symbol;Acc:HGNC:14] | 1.075773    |
| OR51B4   | olfactory receptor family 51 subfamily B member 4 [Source:HGNC Symbol;Acc:HGNC:14708]                | 1.1831416   |
| OR51B5   | olfactory receptor family 51 subfamily B member 5 [Source:HGNC Symbol;Acc:HGNC:19599]                | -1.0741031  |
| OR52A1   | olfactory receptor family 52 subfamily A member 1 [Source:HGNC Symbol;Acc:HGNC:8318]                 | -1.1370674  |
| OR52B2   | olfactory receptor family 52 subfamily B member 2 [Source:HGNC Symbol;Acc:HGNC:15207]                | -1.156535   |
| OR52L1   | olfactory receptor family 52 subfamily L member 1 [Source:HGNC Symbol;Acc:HGNC:14785]                | 1.119468    |
| OR56A3   | olfactory receptor family 56 subfamily A member 3 [Source:HGNC Symbol;Acc:HGNC:14786]                | 1.0653118   |
| OR56A4   | olfactory receptor family 56 subfamily A member 4 [Source:HGNC Symbol;Acc:HGNC:14791]                | -1.1008959  |
| OR56A5   | olfactory receptor family 56 subfamily A member 5 [Source:HGNC Symbol;Acc:HGNC:14792]                | 1.1346315   |
| OR5A1    | olfactory receptor family 5 subfamily A member 1 [Source:HGNC Symbol;Acc:HGNC:8319]                  | -1.2393959  |
| OR5A51   | olfactory receptor family 5 subfamily AS member 1 [Source:HGNC Symbol;Acc:HGNC:15261]                | -1.1433871  |
| OR5AU1   | olfactory receptor family 5 subfamily AU member 1 [Source:HGNC Symbol;Acc:HGNC:15362]                | 1.0851042   |
| OR5C1    | olfactory receptor family 5 subfamily C member 1 [Source:HGNC Symbol;Acc:HGNC:8331]                  | -1.1889173  |
| OR5D14   | olfactory receptor family 5 subfamily D member 14 [Source:HGNC Symbol;Acc:HGNC:15281]                | 1.1983411   |
| OR5D16   | olfactory receptor family 5 subfamily D member 16 [Source:HGNC Symbol;Acc:HGNC:15283]                | -1.1016698  |
| OR5D18   | olfactory receptor family 5 subfamily D member 18 [Source:HGNC Symbol;Acc:HGNC:15285]                | 1.1530051   |
| OR5H1    | olfactory receptor family 5 subfamily H member 1 [Source:HGNC Symbol;Acc:HGNC:8346]                  | -1.3835421  |
| OR5V1    | olfactory receptor family 5 subfamily V member 1 [Source:HGNC Symbol;Acc:HGNC:13972]                 | -1.1541651  |
| OR6B1    | olfactory receptor family 6 subfamily B member 1 [Source:HGNC Symbol;Acc:HGNC:8354]                  | 1.1885264   |
| OR6K6    | olfactory receptor family 6 subfamily K member 6 [Source:HGNC Symbol;Acc:HGNC:15033]                 | 1.1597985   |
| OR7C2    | olfactory receptor family 7 subfamily C member 2 [Source:HGNC Symbol;Acc:HGNC:8374]                  | -1.1190263  |
| OR7E13P  | olfactory receptor family 7 subfamily E member 13 pseudogene [Source:HGNC Symbol;Acc:HGNC:8384]      | -1.1991323  |
| OR7E156P | olfactory receptor family 7 subfamily E member 156 pseudogene [Source:HGNC Symbol;Acc:HGNC:3131]     | -1.2184136  |
| OR7E19P  | olfactory receptor family 7 subfamily E member 19 pseudogene [Source:HGNC Symbol;Acc:HGNC:8390]      | 1.483685    |
| OR7E5P   | olfactory receptor family 7 subfamily E member 5 pseudogene [Source:HGNC Symbol;Acc:HGNC:8435]       | -1.1359444  |
| OR7E91P  | olfactory receptor family 7 subfamily E member 91 pseudogene [Source:HGNC Symbol;Acc:HGNC:14747]     | -1.220694   |
| OR7G2    | olfactory receptor family 7 subfamily G member 2 [Source:HGNC Symbol;Acc:HGNC:8466]                  | -1.0777601  |
| OR8K3    | olfactory receptor family 8 subfamily K member 3 (gene/pseudogene) [Source:HGNC Symbol;Acc:HGNC:151] | -1.1767447  |
| ORAOV1   | oral cancer overexpressed 1 [Source:HGNC Symbol;Acc:HGNC:17589]                                      | -1.10873945 |
| ORC1     | origin recognition complex subunit 1 [Source:HGNC Symbol;Acc:HGNC:8487]                              | 1.2800539   |
| ORC4     | origin recognition complex subunit 4 [Source:HGNC Symbol;Acc:HGNC:8490]                              | 1.3102055   |
| ORC5     | origin recognition complex subunit 5 [Source:HGNC Symbol;Acc:HGNC:8491]                              | 1.2457291   |
| ORC6     | origin recognition complex subunit 6 [Source:HGNC Symbol;Acc:HGNC:17151]                             | 1.2005365   |
| OSBPL11  | oxysterol binding protein like 11 [Source:HGNC Symbol;Acc:HGNC:16397]                                | 1.2359545   |
| OSBPL2   | oxysterol binding protein like 2 [Source:HGNC Symbol;Acc:HGNC:15761]                                 | -1.0756029  |
| OSBPL3   | oxysterol binding protein like 3 [Source:HGNC Symbol;Acc:HGNC:16370]                                 | -1.4310619  |
| OSBPL6   | oxysterol binding protein like 6 [Source:HGNC Symbol;Acc:HGNC:16388]                                 | 1.2975129   |
| OSBPL7   | oxysterol binding protein like 7 [Source:HGNC Symbol;Acc:HGNC:16387]                                 | 1.4192607   |

|          |                                                                                              |             |
|----------|----------------------------------------------------------------------------------------------|-------------|
| OSBPL9   | oxysterol binding protein like 9 [Source:HGNC Symbol;Acc:HGNC:16386]                         | 1.2930473   |
| OSGEPL1  | O-sialoglycoprotein endopeptidase-like 1 [Source:HGNC Symbol;Acc:HGNC:23075]                 | 1.323539    |
| OSGIN1   | oxidative stress induced growth inhibitor 1 [Source:HGNC Symbol;Acc:HGNC:30093]              | -1.225699   |
| OSTN     | osteoecrin [Source:HGNC Symbol;Acc:HGNC:29961]                                               | 1.0821339   |
| OTOG     | otogelin [Source:HGNC Symbol;Acc:HGNC:8516]                                                  | -1.18891365 |
| OTUD4    | OTU deubiquitinase 4 [Source:HGNC Symbol;Acc:HGNC:24949]                                     | -1.151607   |
| OXER1    | oxoeicosanoid receptor 1 [Source:HGNC Symbol;Acc:HGNC:24884]                                 | -1.3758495  |
| P2RX4    | purinergic receptor P2X 4 [Source:HGNC Symbol;Acc:HGNC:8535]                                 | -1.4819273  |
| P2RX7    | purinergic receptor P2X 7 [Source:HGNC Symbol;Acc:HGNC:8537]                                 | 1.1682496   |
| P2RY12   | purinergic receptor P2Y12 [Source:HGNC Symbol;Acc:HGNC:18124]                                | 1.0663192   |
| P2RY6    | pyrimidinergic receptor P2Y6 [Source:HGNC Symbol;Acc:HGNC:8543]                              | -1.5899575  |
| P4HA1    | prolyl 4-hydroxylase subunit alpha 1 [Source:HGNC Symbol;Acc:HGNC:8546]                      | 1.1597677   |
| P4HA2    | prolyl 4-hydroxylase subunit alpha 2 [Source:HGNC Symbol;Acc:HGNC:8547]                      | -1.2146702  |
| P4HB     | prolyl 4-hydroxylase subunit beta [Source:HGNC Symbol;Acc:HGNC:8548]                         | -1.0994105  |
| PAAF1    | proteasomal ATPase associated factor 1 [Source:HGNC Symbol;Acc:HGNC:25687]                   | 1.0917611   |
| PACSN2   | protein kinase C and casein kinase substrate in neurons 2 [Source:HGNC Symbol;Acc:HGNC:8571] | -1.16357605 |
| PADI2    | peptidyl arginine deiminase 2 [Source:HGNC Symbol;Acc:HGNC:18341]                            | -1.1434999  |
| PAK2     | p21 (RAC1) activated kinase 2 [Source:HGNC Symbol;Acc:HGNC:8591]                             | 1.2382716   |
| PALB2    | partner and localizer of BRCA2 [Source:HGNC Symbol;Acc:HGNC:26144]                           | 1.2662883   |
| PALLD    | palladin, cytoskeletal associated protein [Source:HGNC Symbol;Acc:HGNC:17068]                | -1.118894   |
| PALMD    | palmdelphin [Source:HGNC Symbol;Acc:HGNC:15846]                                              | 1.5529926   |
| PANX1    | pannexin 1 [Source:HGNC Symbol;Acc:HGNC:8599]                                                | -2.2744923  |
| PAOX     | polyamine oxidase (exo-N4-amino) [Source:HGNC Symbol;Acc:HGNC:20837]                         | -1.2730788  |
| PAPLN    | papilin, proteoglycan like sulfated glycoprotein [Source:HGNC Symbol;Acc:HGNC:19262]         | -2.5828102  |
| PAPOLB   | poly(A) polymerase beta [Source:HGNC Symbol;Acc:HGNC:15970]                                  | 1.0942662   |
| PARD3B   | par-3 family cell polarity regulator beta [Source:HGNC Symbol;Acc:HGNC:14446]                | 1.0533988   |
| PARL     | presenilin associated rhomboid like [Source:HGNC Symbol;Acc:HGNC:18253]                      | -1.1298854  |
| PARP10   | poly(ADP-ribose) polymerase family member 10 [Source:HGNC Symbol;Acc:HGNC:25895]             | -1.65136    |
| PARP11   | poly(ADP-ribose) polymerase family member 11 [Source:HGNC Symbol;Acc:HGNC:1186]              | 1.0727016   |
| PARP12   | poly(ADP-ribose) polymerase family member 12 [Source:HGNC Symbol;Acc:HGNC:21919]             | -1.4553648  |
| PARP16   | poly(ADP-ribose) polymerase family member 16 [Source:HGNC Symbol;Acc:HGNC:26040]             | 1.3805369   |
| PARP4    | poly(ADP-ribose) polymerase family member 4 [Source:HGNC Symbol;Acc:HGNC:271]                | 1.21597     |
| PARP6    | poly(ADP-ribose) polymerase family member 6 [Source:HGNC Symbol;Acc:HGNC:26921]              | -1.1866733  |
| PARP9    | poly(ADP-ribose) polymerase family member 9 [Source:HGNC Symbol;Acc:HGNC:24118]              | -1.2191552  |
| PARVG    | parvin gamma [Source:HGNC Symbol;Acc:HGNC:14654]                                             | -1.0633644  |
| PATL1    | PAT1 homolog 1, processing body mRNA decay factor [Source:HGNC Symbol;Acc:HGNC:26721]        | -1.4273281  |
| PATZ1    | POZ/BTB and AT hook containing zinc finger 1 [Source:HGNC Symbol;Acc:HGNC:13071]             | 1.1834778   |
| PAX3     | paired box 3 [Source:HGNC Symbol;Acc:HGNC:8617]                                              | 1.1452516   |
| PAX6     | paired box 6 [Source:HGNC Symbol;Acc:HGNC:8620]                                              | 1.09244795  |
| PAX9     | paired box 9 [Source:HGNC Symbol;Acc:HGNC:8623]                                              | 1.350595    |
| PBK      | PDZ binding kinase [Source:HGNC Symbol;Acc:HGNC:18282]                                       | 1.5030258   |
| PBOV1    | prostate and breast cancer overexpressed 1 [Source:HGNC Symbol;Acc:HGNC:21079]               | -1.1321723  |
| PBXIP1   | PBX homeobox interacting protein 1 [Source:HGNC Symbol;Acc:HGNC:21199]                       | 1.115023    |
| PCA3     | prostate cancer associated 3 (non-protein coding) [Source:HGNC Symbol;Acc:HGNC:8637]         | 1.0953386   |
| PCBD2    | pterin-4 alpha-carbinolamine dehydratase 2 [Source:HGNC Symbol;Acc:HGNC:24474]               | -1.2245479  |
| PCCA     | propionyl-CoA carboxylase alpha subunit [Source:HGNC Symbol;Acc:HGNC:8653]                   | 1.1915717   |
| PCDH12   | protocadherin 12 [Source:HGNC Symbol;Acc:HGNC:8657]                                          | -1.5214883  |
| PCDH7    | protocadherin 7 [Source:HGNC Symbol;Acc:HGNC:8659]                                           | 1.4556979   |
| PCDH9    | protocadherin 9 [Source:HGNC Symbol;Acc:HGNC:8661]                                           | -1.0827903  |
| PCDHA1   | protocadherin alpha 1 [Source:HGNC Symbol;Acc:HGNC:8663]                                     | 1.0758625   |
| PCDHA2   | protocadherin alpha 2 [Source:HGNC Symbol;Acc:HGNC:8668]                                     | 1.068006    |
| PCDHA3   | protocadherin alpha 3 [Source:HGNC Symbol;Acc:HGNC:8669]                                     | 1.0938882   |
| PCDHA5   | protocadherin alpha 5 [Source:HGNC Symbol;Acc:HGNC:8671]                                     | -1.391379   |
| PCDHB11  | protocadherin beta 11 [Source:HGNC Symbol;Acc:HGNC:8682]                                     | -1.1345234  |
| PCDHB14  | protocadherin beta 14 [Source:HGNC Symbol;Acc:HGNC:8685]                                     | -1.1506243  |
| PCDHGA12 | protocadherin gamma subfamily A, 12 [Source:HGNC Symbol;Acc:HGNC:8699]                       | -1.1868048  |
| PCDHGA5  | protocadherin gamma subfamily A, 5 [Source:HGNC Symbol;Acc:HGNC:8703]                        | 1.0533369   |
| PCDHGA8  | protocadherin gamma subfamily A, 8 [Source:HGNC Symbol;Acc:HGNC:8706]                        | -1.2446334  |
| PCDHGB7  | protocadherin gamma subfamily B, 7 [Source:HGNC Symbol;Acc:HGNC:8714]                        | -1.1806957  |
| PCDHGC4  | protocadherin gamma subfamily C, 4 [Source:HGNC Symbol;Acc:HGNC:8717]                        | -1.1518114  |
| PCGF5    | polycomb group ring finger 5 [Source:HGNC Symbol;Acc:HGNC:28264]                             | -1.2417965  |
| PCLO     | piccolo presynaptic cytomatrix protein [Source:HGNC Symbol;Acc:HGNC:13406]                   | 1.116391    |
| PCMT1    | protein-L-isoaspartate (D-aspartate) O-methyltransferase [Source:HGNC Symbol;Acc:HGNC:8728]  | -1.1004567  |
| PCNP     | PEST proteolytic signal containing nuclear protein [Source:HGNC Symbol;Acc:HGNC:30023]       | 1.3844329   |
| PCNX     | pecanex homolog 1 (Drosophila)                                                               | -1.2184458  |
| PCP4     | Purkinje cell protein 4 [Source:HGNC Symbol;Acc:HGNC:8742]                                   | -1.0652758  |
| PCSK5    | proprotein convertase subtilisin/kexin type 5 [Source:HGNC Symbol;Acc:HGNC:8747]             | 1.1679882   |
| PCTP     | phosphatidylcholine transfer protein [Source:HGNC Symbol;Acc:HGNC:8752]                      | 1.1647224   |
| PCYT1A   | phosphate cytidyltransferase 1, choline, alpha [Source:HGNC Symbol;Acc:HGNC:8754]            | -1.3517264  |
| PDAP1    | PDGFA associated protein 1 [Source:HGNC Symbol;Acc:HGNC:14634]                               | -1.140192   |
| PDCD1LG2 | programmed cell death 1 ligand 2 [Source:HGNC Symbol;Acc:HGNC:18731]                         | -1.1713042  |
| PDCD2    | programmed cell death 2 [Source:HGNC Symbol;Acc:HGNC:8762]                                   | 1.0717789   |
| PDCD7    | programmed cell death 7 [Source:HGNC Symbol;Acc:HGNC:8767]                                   | 1.1732742   |
| PDCI     | phosducin like [Source:HGNC Symbol;Acc:HGNC:8770]                                            | 1.4813218   |
| PDDC1    | Parkinson disease 7 domain containing 1 [Source:HGNC Symbol;Acc:HGNC:26616]                  | -1.1347449  |
| PDE1A    | phosphodiesterase 1A [Source:HGNC Symbol;Acc:HGNC:8774]                                      | -1.111751   |
| PDE4B    | phosphodiesterase 4B [Source:HGNC Symbol;Acc:HGNC:8781]                                      | -1.3457139  |
| PDE5A    | phosphodiesterase 5A [Source:HGNC Symbol;Acc:HGNC:8784]                                      | -1.3351357  |
| PDE6D    | phosphodiesterase 6D [Source:HGNC Symbol;Acc:HGNC:8788]                                      | -1.2344568  |
| PDE7B    | phosphodiesterase 7B [Source:HGNC Symbol;Acc:HGNC:8792]                                      | 1.9053061   |
| PDE9A    | phosphodiesterase 9A [Source:HGNC Symbol;Acc:HGNC:8795]                                      | -1.2880346  |
| PDGFB    | platelet derived growth factor subunit B [Source:HGNC Symbol;Acc:HGNC:8800]                  | -1.393895   |
| PDGFC    | platelet derived growth factor C [Source:HGNC Symbol;Acc:HGNC:8801]                          | -1.2014569  |
| PDGFR1   | platelet derived growth factor receptor like [Source:HGNC Symbol;Acc:HGNC:8805]              | -1.7485782  |
| PDHAA    | pyruvate dehydrogenase (lipoamide) alpha 1 [Source:HGNC Symbol;Acc:HGNC:8806]                | -1.2505089  |
| PDIA4    | protein disulfide isomerase family A member 4 [Source:HGNC Symbol;Acc:HGNC:30167]            | 1.2604866   |

|          |                                                                                                            |             |
|----------|------------------------------------------------------------------------------------------------------------|-------------|
| PDIA5    | protein disulfide isomerase family A member 5 [Source:HGNC Symbol;Acc:HGNC:24811]                          | -1.1073412  |
| PDK3     | pyruvate dehydrogenase kinase 3 [Source:HGNC Symbol;Acc:HGNC:8811]                                         | -1.1541294  |
| PDK4     | pyruvate dehydrogenase kinase 4 [Source:HGNC Symbol;Acc:HGNC:8812]                                         | -1.1843957  |
| PDLM1    | PDZ and LIM domain 1 [Source:HGNC Symbol;Acc:HGNC:2067]                                                    | -1.2064899  |
| PDLM4    | PDZ and LIM domain 4 [Source:HGNC Symbol;Acc:HGNC:16501]                                                   | -1.9695991  |
| PDLM5    | PDZ and LIM domain 5 [Source:HGNC Symbol;Acc:HGNC:17468]                                                   | -1.0868515  |
| PDLM7    | PDZ and LIM domain 7 [Source:HGNC Symbol;Acc:HGNC:22958]                                                   | 1.1619644   |
| PDRLG1   | p53 and DNA damage regulated 1 [Source:HGNC Symbol;Acc:HGNC:16119]                                         | -1.1708859  |
| PDXP     | pyridoxal phosphatase [Source:HGNC Symbol;Acc:HGNC:30259]                                                  | 1.5862558   |
| PDZD11   | PDZ domain containing 11 [Source:HGNC Symbol;Acc:HGNC:28034]                                               | -1.16477365 |
| PDZD2    | PDZ domain containing 2 [Source:HGNC Symbol;Acc:HGNC:18486]                                                | -2.5348952  |
| PEA15    | phosphoprotein enriched in astrocytes 15 [Source:HGNC Symbol;Acc:HGNC:8822]                                | 1.15223065  |
| PEBP1    | phosphatidylethanolamine binding protein 1 [Source:HGNC Symbol;Acc:HGNC:8630]                              | 1.0957117   |
| PEF1     | penta-EF-hand domain containing 1 [Source:HGNC Symbol;Acc:HGNC:30009]                                      | -1.0971975  |
| PEG3     | paternally expressed 3 [Source:HGNC Symbol;Acc:HGNC:8826]                                                  | 1.1355479   |
| PEL12    | pellino E3 ubiquitin protein ligase family member 2 [Source:HGNC Symbol;Acc:HGNC:8828]                     | 1.5983356   |
| PEPD     | peptidase D [Source:HGNC Symbol;Acc:HGNC:8840]                                                             | -1.1098031  |
| PER4     | period circadian clock 3 pseudogene                                                                        | -1.0853449  |
| PEX11B   | peroxisomal biogenesis factor 11 beta [Source:HGNC Symbol;Acc:HGNC:8853]                                   | -1.2818654  |
| PEX11G   | peroxisomal biogenesis factor 11 gamma [Source:HGNC Symbol;Acc:HGNC:20208]                                 | -1.1438046  |
| PEX14    | peroxisomal biogenesis factor 14 [Source:HGNC Symbol;Acc:HGNC:8856]                                        | -1.1476759  |
| PEX2     | peroxisomal biogenesis factor 2 [Source:HGNC Symbol;Acc:HGNC:9717]                                         | 1.0919818   |
| PEX26    | peroxisomal biogenesis factor 26 [Source:HGNC Symbol;Acc:HGNC:22965]                                       | -1.2084986  |
| PEX3     | peroxisomal biogenesis factor 3 [Source:HGNC Symbol;Acc:HGNC:8858]                                         | 1.1109711   |
| PFND2    | prefoldin subunit 2 [Source:HGNC Symbol;Acc:HGNC:8867]                                                     | 1.1714408   |
| PKFB2    | 6-phosphofructo-2-kinase/fructose-2,6-biphosphatase 2 [Source:HGNC Symbol;Acc:HGNC:8873]                   | -1.4010214  |
| PKFB3    | 6-phosphofructo-2-kinase/fructose-2,6-biphosphatase 3 [Source:HGNC Symbol;Acc:HGNC:8874]                   | -1.6853517  |
| PKFP     | phosphofructokinase, platelet [Source:HGNC Symbol;Acc:HGNC:8878]                                           | -1.1174766  |
| PFN1     | profilin 1 [Source:HGNC Symbol;Acc:HGNC:8881]                                                              | 1.0749463   |
| PGA3     | pepsinogen 3, group 1 (pepsinogen A) [Source:HGNC Symbol;Acc:HGNC:8885]                                    | -1.0551398  |
| PGAM4    | phosphoglycerate mutase family member 4 [Source:HGNC Symbol;Acc:HGNC:21731]                                | -1.1258359  |
| PGAP1    | post-GPI attachment to proteins 1 [Source:HGNC Symbol;Acc:HGNC:25712]                                      | 1.1895629   |
| PGBD2    | piggyBac transposable element derived 2 [Source:HGNC Symbol;Acc:HGNC:19399]                                | 1.1030298   |
| PGC      | progastricin [Source:HGNC Symbol;Acc:HGNC:8890]                                                            | -1.186319   |
| PGD      | phosphogluconate dehydrogenase [Source:HGNC Symbol;Acc:HGNC:8891]                                          | -1.1507444  |
| PGF      | placental growth factor [Source:HGNC Symbol;Acc:HGNC:8893]                                                 | 1.4565831   |
| PGLYRP1  | peptidoglycan recognition protein 1 [Source:HGNC Symbol;Acc:HGNC:8904]                                     | -1.1033852  |
| PGLYRP2  | peptidoglycan recognition protein 2 [Source:HGNC Symbol;Acc:HGNC:30013]                                    | -1.1462184  |
| PGM1     | phosphoglucomutase 1 [Source:HGNC Symbol;Acc:HGNC:8905]                                                    | -1.1448034  |
| PGPEP1   | pyroglutamyl-peptidase I [Source:HGNC Symbol;Acc:HGNC:13568]                                               | 1.489026    |
| PGRMC2   | progesterone receptor membrane component 2 [Source:HGNC Symbol;Acc:HGNC:16089]                             | 1.3258793   |
| PHACTR3  | phosphatase and actin regulator 3 [Source:HGNC Symbol;Acc:HGNC:15833]                                      | 1.1339577   |
| PHB      | prohibitin [Source:HGNC Symbol;Acc:HGNC:8912]                                                              | -1.1385491  |
| PHF12    | PHD finger protein 12 [Source:HGNC Symbol;Acc:HGNC:20816]                                                  | -1.1400425  |
| PHF15    | jade family PHD finger 2                                                                                   | -1.3133161  |
| PHF17    | jade family PHD finger 1                                                                                   | 1.5219905   |
| PHF2     | PHD finger protein 2 [Source:HGNC Symbol;Acc:HGNC:8920]                                                    | -1.078113   |
| PHF20    | PHD finger protein 20 [Source:HGNC Symbol;Acc:HGNC:16098]                                                  | -1.2209255  |
| PHF23    | PHD finger protein 23 [Source:HGNC Symbol;Acc:HGNC:28428]                                                  | 1.12990695  |
| PHF5A    | PHD finger protein 5A [Source:HGNC Symbol;Acc:HGNC:18000]                                                  | 1.1082019   |
| PHF8     | PHD finger protein 8 [Source:HGNC Symbol;Acc:HGNC:20672]                                                   | -1.1832398  |
| PHKA2    | phosphorylase kinase regulatory subunit alpha 2 [Source:HGNC Symbol;Acc:HGNC:8926]                         | 1.1574057   |
| PHKB     | phosphorylase kinase regulatory subunit beta [Source:HGNC Symbol;Acc:HGNC:8927]                            | 1.169951    |
| PHLDA2   | pleckstrin homology like domain family A member 2 [Source:HGNC Symbol;Acc:HGNC:12385]                      | -1.46419    |
| PHLPP2   | PH domain and leucine rich repeat protein phosphatase 2 [Source:HGNC Symbol;Acc:HGNC:29149]                | -1.1291445  |
| PHRF1    | PHD and ring finger domains 1 [Source:HGNC Symbol;Acc:HGNC:24351]                                          | 1.0577971   |
| PHTF1    | putative homeodomain transcription factor 1 [Source:HGNC Symbol;Acc:HGNC:8939]                             | 1.3572558   |
| PHTF2    | putative homeodomain transcription factor 2 [Source:HGNC Symbol;Acc:HGNC:13411]                            | 1.5012875   |
| PI4KB    | phosphatidylinositol 4-kinase beta [Source:HGNC Symbol;Acc:HGNC:8984]                                      | -1.21080435 |
| PIA3S    | protein inhibitor of activated STAT 3 [Source:HGNC Symbol;Acc:HGNC:16861]                                  | 1.0720308   |
| PIGA     | phosphatidylinositol glycan anchor biosynthesis class A [Source:HGNC Symbol;Acc:HGNC:8957]                 | 1.1063608   |
| PIGC     | phosphatidylinositol glycan anchor biosynthesis class C [Source:HGNC Symbol;Acc:HGNC:8960]                 | 1.1024767   |
| PIGG     | phosphatidylinositol glycan anchor biosynthesis class G [Source:HGNC Symbol;Acc:HGNC:25985]                | -1.1840585  |
| PIGK     | phosphatidylinositol glycan anchor biosynthesis class K [Source:HGNC Symbol;Acc:HGNC:8965]                 | 1.5230957   |
| PIGN     | phosphatidylinositol glycan anchor biosynthesis class N [Source:HGNC Symbol;Acc:HGNC:8967]                 | 1.1643058   |
| PIGQ     | phosphatidylinositol glycan anchor biosynthesis class Q [Source:HGNC Symbol;Acc:HGNC:14135]                | 1.1149392   |
| PIGS     | phosphatidylinositol glycan anchor biosynthesis class S [Source:HGNC Symbol;Acc:HGNC:14937]                | -1.1851413  |
| PIGU     | phosphatidylinositol glycan anchor biosynthesis class U [Source:HGNC Symbol;Acc:HGNC:15791]                | -1.0932395  |
| PIGX     | phosphatidylinositol glycan anchor biosynthesis class X [Source:HGNC Symbol;Acc:HGNC:26046]                | 1.1303811   |
| PIK3AP1  | phosphoinositide-3-kinase adaptor protein 1 [Source:HGNC Symbol;Acc:HGNC:30034]                            | 1.0779663   |
| PIK3C2B  | phosphatidylinositol-4-phosphate 3-kinase catalytic subunit type 2 beta [Source:HGNC Symbol;Acc:HGNC:8988] | -1.5629599  |
| PIK3CB   | phosphatidylinositol-4,5-bisphosphate 3-kinase catalytic subunit beta [Source:HGNC Symbol;Acc:HGNC:8989]   | 1.2095671   |
| PIK3CD   | phosphatidylinositol-4,5-bisphosphate 3-kinase catalytic subunit delta [Source:HGNC Symbol;Acc:HGNC:8990]  | -1.8270771  |
| PIK3CG   | phosphatidylinositol-4,5-bisphosphate 3-kinase catalytic subunit gamma [Source:HGNC Symbol;Acc:HGNC:8991]  | 1.5327988   |
| PILRB    | paired immunoglobulin-like type 2 receptor beta [Source:HGNC Symbol;Acc:HGNC:18297]                        | -1.0593379  |
| PIM1     | Pim-1 proto-oncogene, serine/threonine kinase [Source:HGNC Symbol;Acc:HGNC:8986]                           | 1.2265952   |
| PIN1     | peptidylprolyl cis/trans isomerase, NIMA-interacting 1 [Source:HGNC Symbol;Acc:HGNC:8988]                  | 1.2424008   |
| PIN1P1   | peptidylprolyl cis/trans isomerase, NIMA-interacting 1 pseudogene 1 [Source:HGNC Symbol;Acc:HGNC:8989]     | 1.2454847   |
| PINX1    | PIN2/TERF1 interacting, telomerase inhibitor 1 [Source:HGNC Symbol;Acc:HGNC:30046]                         | -1.2181548  |
| PION     | gamma-secretase activating protein                                                                         | -1.1931988  |
| PIPSK1B  | phosphatidylinositol-4-phosphate 5-kinase type 1 beta [Source:HGNC Symbol;Acc:HGNC:8995]                   | 1.0794615   |
| PIPSK1P1 | phosphatidylinositol-4-phosphate 5-kinase type 1 pseudogene 1 [Source:HGNC Symbol;Acc:HGNC:28372]          | -1.0974145  |
| PITPNM3  | PITPNM family member 3 [Source:HGNC Symbol;Acc:HGNC:21043]                                                 | 1.2326429   |
| PITX3    | paired like homeodomain 3 [Source:HGNC Symbol;Acc:HGNC:9006]                                               | -1.154338   |
| PJA1     | praja ring finger ubiquitin ligase 1 [Source:HGNC Symbol;Acc:HGNC:16648]                                   | -1.2743773  |
| PKD1     | polycystin 1, transient receptor potential channel interacting [Source:HGNC Symbol;Acc:HGNC:9008]          | -1.2798247  |

|          |                                                                                                       |              |
|----------|-------------------------------------------------------------------------------------------------------|--------------|
| PKD1L2   | polycystin 1 like 2 (gene/pseudogene) [Source:HGNC Symbol;Acc:HGNC:21715]                             | -1.0772259   |
| PKDCC    | protein kinase domain containing, cytoplasmic [Source:HGNC Symbol;Acc:HGNC:25123]                     | 1.39499845   |
| PKIG     | protein kinase (cAMP-dependent, catalytic) inhibitor gamma [Source:HGNC Symbol;Acc:HGNC:9019]         | -1.373575    |
| PKNOX2   | PBX/knotted 1 homeobox 2 [Source:HGNC Symbol;Acc:HGNC:16714]                                          | 1.0923101    |
| PKP2     | plakophilin 2 [Source:HGNC Symbol;Acc:HGNC:9024]                                                      | 1.1693565    |
| PKP4     | plakophilin 4 [Source:HGNC Symbol;Acc:HGNC:9026]                                                      | 1.1752901    |
| PLA2G12A | phospholipase A2 group XIIA [Source:HGNC Symbol;Acc:HGNC:18554]                                       | -1.0684586   |
| PLA2G16  | phospholipase A2 group XVI [Source:HGNC Symbol;Acc:HGNC:17825]                                        | 1.2061101    |
| PLA2G2C  | phospholipase A2 group IIC [Source:HGNC Symbol;Acc:HGNC:9032]                                         | -1.124607    |
| PLA2G2D  | phospholipase A2 group IID [Source:HGNC Symbol;Acc:HGNC:9033]                                         | -1.1052215   |
| PLA2G4A  | phospholipase A2 group IVA [Source:HGNC Symbol;Acc:HGNC:9035]                                         | 1.2550426    |
| PLA2G4C  | phospholipase A2 group IVC [Source:HGNC Symbol;Acc:HGNC:9037]                                         | -1.6717633   |
| PLA2G5   | phospholipase A2 group V [Source:HGNC Symbol;Acc:HGNC:9038]                                           | -1.5316108   |
| PLAC8    | placenta specific 8 [Source:HGNC Symbol;Acc:HGNC:19254]                                               | 1.0766348    |
| PLAC9    | placenta specific 9 [Source:HGNC Symbol;Acc:HGNC:19255]                                               | -1.2373068   |
| PLAGL2   | PLAG1 like zinc finger 2 [Source:HGNC Symbol;Acc:HGNC:9047]                                           | -1.2629566   |
| PLAU     | plasminogen activator, urokinase [Source:HGNC Symbol;Acc:HGNC:9052]                                   | -3.6658466   |
| PLAUR    | plasminogen activator, urokinase receptor [Source:HGNC Symbol;Acc:HGNC:9053]                          | -1.1335421   |
| PLCB1    | phospholipase C beta 1 [Source:HGNC Symbol;Acc:HGNC:15917]                                            | 1.0977348    |
| PLCB2    | phospholipase C beta 2 [Source:HGNC Symbol;Acc:HGNC:9055]                                             | 1.3084667    |
| PLCB4    | phospholipase C beta 4 [Source:HGNC Symbol;Acc:HGNC:9059]                                             | -1.2671567   |
| PLCD3    | phospholipase C delta 3 [Source:HGNC Symbol;Acc:HGNC:9061]                                            | 1.3275344    |
| PLCD4    | phospholipase C delta 4 [Source:HGNC Symbol;Acc:HGNC:9062]                                            | -1.5221984   |
| PLCE1    | phospholipase C epsilon 1 [Source:HGNC Symbol;Acc:HGNC:17175]                                         | -1.1013318   |
| PLCG2    | phospholipase C gamma 2 [Source:HGNC Symbol;Acc:HGNC:9066]                                            | -1.1942577   |
| PLCL2    | phospholipase C like 2 [Source:HGNC Symbol;Acc:HGNC:9064]                                             | 1.1478751    |
| PLCXD1   | phosphatidylinositol specific phospholipase C X domain containing 1 [Source:HGNC Symbol;Acc:HGNC:231] | 1.2977169    |
| PLCXD3   | phosphatidylinositol specific phospholipase C X domain containing 3 [Source:HGNC Symbol;Acc:HGNC:318] | 1.06927      |
| PLD2     | phospholipase D2 [Source:HGNC Symbol;Acc:HGNC:9068]                                                   | -1.4411585   |
| PLD6     | phospholipase D family member 6 [Source:HGNC Symbol;Acc:HGNC:30447]                                   | 1.2023072    |
| PLEC     | plectin [Source:HGNC Symbol;Acc:HGNC:9069]                                                            | 1.2061851    |
| PLEKHA4  | pleckstrin homology domain containing A4 [Source:HGNC Symbol;Acc:HGNC:14339]                          | -1.3045158   |
| PLEKHA6  | pleckstrin homology domain containing A6 [Source:HGNC Symbol;Acc:HGNC:17053]                          | 1.3253518    |
| PLEKHB2  | pleckstrin homology domain containing B2 [Source:HGNC Symbol;Acc:HGNC:19236]                          | -1.2048403   |
| PLEKHF2  | pleckstrin homology and FYVE domain containing 2 [Source:HGNC Symbol;Acc:HGNC:20757]                  | 1.2496653    |
| PLEKHG1  | pleckstrin homology and RhoGEF domain containing G1 [Source:HGNC Symbol;Acc:HGNC:20884]               | -1.127959    |
| PLEKHG3  | pleckstrin homology and RhoGEF domain containing G3 [Source:HGNC Symbol;Acc:HGNC:20364]               | -1.2429764   |
| PLEKHG4  | pleckstrin homology and RhoGEF domain containing G4 [Source:HGNC Symbol;Acc:HGNC:24501]               | 1.1478274    |
| PLEKHG4B | pleckstrin homology and RhoGEF domain containing G4B [Source:HGNC Symbol;Acc:HGNC:29399]              | 1.1454644    |
| PLEKHG7  | pleckstrin homology and RhoGEF domain containing G7 [Source:HGNC Symbol;Acc:HGNC:33829]               | 1.1128165    |
| PLEKHM1  | pleckstrin homology and RUN domain containing M1 [Source:HGNC Symbol;Acc:HGNC:29017]                  | -1.1965452   |
| PLEKHO1  | pleckstrin homology domain containing O1 [Source:HGNC Symbol;Acc:HGNC:24310]                          | 1.0656023    |
| PLEKHO2  | pleckstrin homology domain containing O2 [Source:HGNC Symbol;Acc:HGNC:30026]                          | -1.6812955   |
| PLG      | plasminogen [Source:HGNC Symbol;Acc:HGNC:9071]                                                        | 1.080244     |
| PLIN2    | perilipin 2 [Source:HGNC Symbol;Acc:HGNC:248]                                                         | 1.1608387    |
| PLIN4    | perilipin 4 [Source:HGNC Symbol;Acc:HGNC:29393]                                                       | -1.1176945   |
| PLK1     | polo like kinase 1 [Source:HGNC Symbol;Acc:HGNC:9077]                                                 | 1.133942     |
| PLK2     | polo like kinase 2 [Source:HGNC Symbol;Acc:HGNC:19699]                                                | -1.5800034   |
| PLK3     | polo like kinase 3 [Source:HGNC Symbol;Acc:HGNC:2154]                                                 | -1.1642267   |
| PLK4     | polo like kinase 4 [Source:HGNC Symbol;Acc:HGNC:11397]                                                | 1.383828     |
| PLLP     | plasmolipin [Source:HGNC Symbol;Acc:HGNC:18553]                                                       | -1.8300961   |
| PLXDC1   | plexin domain containing 1 [Source:HGNC Symbol;Acc:HGNC:20945]                                        | -1.1078465   |
| PLXNA1   | plexin A1 [Source:HGNC Symbol;Acc:HGNC:9099]                                                          | -1.3369428   |
| PLXNA2   | plexin A2 [Source:HGNC Symbol;Acc:HGNC:9100]                                                          | 1.2145233    |
| PLXNB1   | plexin B1 [Source:HGNC Symbol;Acc:HGNC:9103]                                                          | -1.1343492   |
| PLXNB2   | plexin B2 [Source:HGNC Symbol;Acc:HGNC:9104]                                                          | -1.1624212   |
| PLXNB3   | plexin B3 [Source:HGNC Symbol;Acc:HGNC:9105]                                                          | 1.1134405    |
| PM20D1   | peptidase M20 domain containing 1 [Source:HGNC Symbol;Acc:HGNC:26518]                                 | 1.0770282    |
| PMAIP1   | phorbol-12-myristate-13-acetate-induced protein 1 [Source:HGNC Symbol;Acc:HGNC:9108]                  | -1.9358847   |
| PMEPA1   | prostate transmembrane protein, androgen induced 1 [Source:HGNC Symbol;Acc:HGNC:14107]                | 1.3048342    |
| PMFBP1   | polyamine modulated factor 1 binding protein 1 [Source:HGNC Symbol;Acc:HGNC:17728]                    | -1.071204    |
| PML      | promyelocytic leukemia [Source:HGNC Symbol;Acc:HGNC:9113]                                             | -1.576471533 |
| PMP22    | peripheral myelin protein 22 [Source:HGNC Symbol;Acc:HGNC:9118]                                       | -1.4879855   |
| PMS2L2   | PMS1 homolog 2, mismatch repair system component pseudogene 2                                         | 1.0623374    |
| PMS2P5   | IS1 homolog 2, mismatch repair system component pseudogene 5 [Source:HGNC Symbol;Acc:HGNC:91]         | -1.14247     |
| PNKD     | paroxysmal nonkinesigenic dyskinesia [Source:HGNC Symbol;Acc:HGNC:9153]                               | -1.1933361   |
| PNMA6A   | paraneoplastic Ma antigen family member 6A [Source:HGNC Symbol;Acc:HGNC:28248]                        | 1.1078731    |
| PNMAL1   | paraneoplastic Ma antigen family like 1 [Source:HGNC Symbol;Acc:HGNC:25578]                           | 1.3285961    |
| PNMAL2   | paraneoplastic Ma antigen family like 2 [Source:HGNC Symbol;Acc:HGNC:29206]                           | -1.2039226   |
| PNP      | purine nucleoside phosphorylase [Source:HGNC Symbol;Acc:HGNC:7892]                                    | 1.2035432    |
| PNPLA4   | patatin like phospholipase domain containing 4 [Source:HGNC Symbol;Acc:HGNC:24887]                    | -1.0947318   |
| PNPT1    | polyribonucleotide nucleotidyltransferase 1 [Source:HGNC Symbol;Acc:HGNC:23166]                       | 1.363815     |
| PNRC1    | proline rich nuclear receptor coactivator 1 [Source:HGNC Symbol;Acc:HGNC:17278]                       | -1.491026    |
| POFUT2   | protein O-fucosyltransferase 2 [Source:HGNC Symbol;Acc:HGNC:14683]                                    | 1.126868     |
| POGK     | pogo transposable element with KRAB domain [Source:HGNC Symbol;Acc:HGNC:18800]                        | -1.2757027   |
| POLD3    | DNA polymerase delta 3, accessory subunit [Source:HGNC Symbol;Acc:HGNC:20932]                         | 1.2591331    |
| POLDIP3  | DNA polymerase delta interacting protein 3 [Source:HGNC Symbol;Acc:HGNC:23782]                        | -1.1764833   |
| POLE     | DNA polymerase epsilon, catalytic subunit [Source:HGNC Symbol;Acc:HGNC:9177]                          | 1.1039143    |
| POLG     | DNA polymerase gamma, catalytic subunit [Source:HGNC Symbol;Acc:HGNC:9179]                            | -1.1557217   |
| POLN     | DNA polymerase nu [Source:HGNC Symbol;Acc:HGNC:18870]                                                 | 1.1041567    |
| POLR1C   | RNA polymerase I subunit C [Source:HGNC Symbol;Acc:HGNC:20194]                                        | -1.0941062   |
| POLR2B   | RNA polymerase II subunit B [Source:HGNC Symbol;Acc:HGNC:9188]                                        | 1.3690048    |
| POLR2D   | RNA polymerase II subunit D [Source:HGNC Symbol;Acc:HGNC:9191]                                        | -1.1413199   |
| POLR2G   | RNA polymerase II subunit G [Source:HGNC Symbol;Acc:HGNC:9194]                                        | -1.1731031   |
| POLR2H   | RNA polymerase II subunit H [Source:HGNC Symbol;Acc:HGNC:9195]                                        | 1.1129702    |
| POLR2K   | RNA polymerase II subunit K [Source:HGNC Symbol;Acc:HGNC:9198]                                        | -1.1619179   |

|             |                                                                                                          |            |
|-------------|----------------------------------------------------------------------------------------------------------|------------|
| POLR3E      | RNA polymerase III subunit E [Source:HGNC Symbol;Acc:HGNC:30347]                                         | -1.1106274 |
| POLR3G      | RNA polymerase III subunit G [Source:HGNC Symbol;Acc:HGNC:30075]                                         | 1.5255877  |
| POLR3GL     | RNA polymerase III subunit G like [Source:HGNC Symbol;Acc:HGNC:28466]                                    | 1.0729084  |
| POLR3H      | RNA polymerase III subunit H [Source:HGNC Symbol;Acc:HGNC:30349]                                         | 1.2078291  |
| POLR3K      | RNA polymerase III subunit K [Source:HGNC Symbol;Acc:HGNC:14121]                                         | 1.2108947  |
| POM121L10P  | POM121 transmembrane nucleoporin like 10, pseudogene [Source:HGNC Symbol;Acc:HGNC:35448]                 | 1.1422875  |
| POM121L1P   | POM121 transmembrane nucleoporin like 1, pseudogene [Source:HGNC Symbol;Acc:HGNC:16439]                  | 1.0987558  |
| POM121L2    | POM121 transmembrane nucleoporin like 2 [Source:HGNC Symbol;Acc:HGNC:13973]                              | 1.0866201  |
| POM121L4P   | POM121 transmembrane nucleoporin like 4, pseudogene [Source:HGNC Symbol;Acc:HGNC:19326]                  | -1.1346741 |
| POMT2       | protein O-mannosyltransferase 2 [Source:HGNC Symbol;Acc:HGNC:19743]                                      | 1.0813807  |
| POP5        | POP5 homolog, ribonuclease P/MRP subunit [Source:HGNC Symbol;Acc:HGNC:17689]                             | -1.1359521 |
| POR         | cytochrome p450 oxidoreductase [Source:HGNC Symbol;Acc:HGNC:9208]                                        | -1.1947742 |
| POTEF       | POTE ankyrin domain family member F [Source:HGNC Symbol;Acc:HGNC:33905]                                  | -1.1613919 |
| PPAN-P2RY11 | PPAN-P2RY11 readthrough [Source:HGNC Symbol;Acc:HGNC:33526]                                              | 1.1644465  |
| PPAP2A      | phospholipid phosphatase 1                                                                               | -1.7911497 |
| PPAP2B      | phospholipid phosphatase 3                                                                               | -1.4292244 |
| PPARGC1B    | PPARG coactivator 1 beta [Source:HGNC Symbol;Acc:HGNC:30022]                                             | 1.2223347  |
| PPAT        | phosphoribosyl pyrophosphate amidotransferase [Source:HGNC Symbol;Acc:HGNC:9238]                         | 1.6158689  |
| PPCDC       | phosphopantothenoylcysteine decarboxylase [Source:HGNC Symbol;Acc:HGNC:28107]                            | -1.0662992 |
| PPF1B2      | PPF1A binding protein 2 [Source:HGNC Symbol;Acc:HGNC:9250]                                               | 1.2659147  |
| PPIA        | peptidylprolyl isomerase A [Source:HGNC Symbol;Acc:HGNC:9253]                                            | -1.0948275 |
| PPIAL4G     | peptidylprolyl isomerase A like 4G [Source:HGNC Symbol;Acc:HGNC:33996]                                   | -1.1838534 |
| PPIF        | peptidylprolyl isomerase F [Source:HGNC Symbol;Acc:HGNC:9259]                                            | -1.1751583 |
| PPIH        | peptidylprolyl isomerase H [Source:HGNC Symbol;Acc:HGNC:14651]                                           | -1.0856756 |
| PPIL2       | peptidylprolyl isomerase like 2 [Source:HGNC Symbol;Acc:HGNC:9261]                                       | -1.1240679 |
| PPL         | periaklin [Source:HGNC Symbol;Acc:HGNC:9273]                                                             | -1.1562318 |
| PPM1D       | protein phosphatase, Mg <sup>2+</sup> /Mn <sup>2+</sup> dependent 1D [Source:HGNC Symbol;Acc:HGNC:9277]  | 1.1839567  |
| PPM1F       | protein phosphatase, Mg <sup>2+</sup> /Mn <sup>2+</sup> dependent 1F [Source:HGNC Symbol;Acc:HGNC:19388] | -1.3110054 |
| PPM1J       | protein phosphatase, Mg <sup>2+</sup> /Mn <sup>2+</sup> dependent 1J [Source:HGNC Symbol;Acc:HGNC:20785] | -1.0835079 |
| PPME1       | protein phosphatase methylesterase 1 [Source:HGNC Symbol;Acc:HGNC:30178]                                 | -1.1195854 |
| PPP1R10     | protein phosphatase 1 regulatory subunit 10 [Source:HGNC Symbol;Acc:HGNC:9284]                           | 1.0740864  |
| PPP1R13B    | protein phosphatase 1 regulatory subunit 13B [Source:HGNC Symbol;Acc:HGNC:14950]                         | -1.7147648 |
| PPP1R15A    | protein phosphatase 1 regulatory subunit 15A [Source:HGNC Symbol;Acc:HGNC:14375]                         | -1.2326063 |
| PPP1R3A     | protein phosphatase 1 regulatory subunit 3A [Source:HGNC Symbol;Acc:HGNC:9291]                           | 1.0816936  |
| PPP1R3B     | protein phosphatase 1 regulatory subunit 3B [Source:HGNC Symbol;Acc:HGNC:14942]                          | 1.3317975  |
| PPP1R3G     | protein phosphatase 1 regulatory subunit 3G [Source:HGNC Symbol;Acc:HGNC:14945]                          | -1.170762  |
| PPP1R9A     | protein phosphatase 1 regulatory subunit 9A [Source:HGNC Symbol;Acc:HGNC:14946]                          | 1.1525604  |
| PPP2CA      | protein phosphatase 2 catalytic subunit alpha [Source:HGNC Symbol;Acc:HGNC:9299]                         | -1.1998922 |
| PPP2R1B     | protein phosphatase 2 scaffold subunit Abeta [Source:HGNC Symbol;Acc:HGNC:9303]                          | -1.2915275 |
| PPP2R3C     | protein phosphatase 2 regulatory subunit B"gamma [Source:HGNC Symbol;Acc:HGNC:17485]                     | 1.3481054  |
| PPP2R5B     | protein phosphatase 2 regulatory subunit B'beta [Source:HGNC Symbol;Acc:HGNC:9310]                       | -1.1320546 |
| PPP3CB      | protein phosphatase 3 catalytic subunit beta [Source:HGNC Symbol;Acc:HGNC:9315]                          | -1.1937457 |
| PPP3CC      | protein phosphatase 3 catalytic subunit gamma [Source:HGNC Symbol;Acc:HGNC:9316]                         | -1.0698309 |
| PPP4R1L     | protein phosphatase 4 regulatory subunit 1 like (pseudogene) [Source:HGNC Symbol;Acc:HGNC:15755]         | -1.2356414 |
| PPP5C       | protein phosphatase 5 catalytic subunit [Source:HGNC Symbol;Acc:HGNC:9322]                               | 1.4402192  |
| PPT2        | palmitoyl-protein thioesterase 2 [Source:HGNC Symbol;Acc:HGNC:9326]                                      | 1.2660841  |
| PQLC1       | PQ loop repeat containing 1 [Source:HGNC Symbol;Acc:HGNC:26188]                                          | -1.3197469 |
| PRAMEF2     | PRAME family member 2 [Source:HGNC Symbol;Acc:HGNC:28841]                                                | 1.1137437  |
| PRCD        | progressive rod-cone degeneration [Source:HGNC Symbol;Acc:HGNC:32528]                                    | -1.0792962 |
| PRDM1       | PR/SET domain 1 [Source:HGNC Symbol;Acc:HGNC:9346]                                                       | -1.5286527 |
| PRDM12      | PR/SET domain 12 [Source:HGNC Symbol;Acc:HGNC:13997]                                                     | 1.1000183  |
| PRDM14      | PR/SET domain 14 [Source:HGNC Symbol;Acc:HGNC:14001]                                                     | 1.0806712  |
| PRDM8       | PR/SET domain 8 [Source:HGNC Symbol;Acc:HGNC:13993]                                                      | -2.9975948 |
| PRDM9       | PR/SET domain 9 [Source:HGNC Symbol;Acc:HGNC:13994]                                                      | -1.1094548 |
| PRDX1       | peroxiredoxin 1 [Source:HGNC Symbol;Acc:HGNC:9352]                                                       | 1.2535508  |
| PRDX5       | peroxiredoxin 5 [Source:HGNC Symbol;Acc:HGNC:9355]                                                       | -1.0715536 |
| PREPL       | prolyl endopeptidase-like [Source:HGNC Symbol;Acc:HGNC:30228]                                            | 1.3544335  |
| PRG1        | serglycin                                                                                                | 1.1098455  |
| PRIC2B5     | helicase with zinc finger 2                                                                              | -2.2810578 |
| PRICKL1     | prickle planar cell polarity protein 1 [Source:HGNC Symbol;Acc:HGNC:17019]                               | 2.1234584  |
| PRIM1       | primase (DNA) subunit 1 [Source:HGNC Symbol;Acc:HGNC:9369]                                               | 1.2464645  |
| PRINS       | psoriasis associated non-protein coding RNA induced by stress                                            | -1.8291407 |
| PRKACA      | protein kinase cAMP-activated catalytic subunit alpha [Source:HGNC Symbol;Acc:HGNC:9380]                 | 1.3031893  |
| PRKACB      | protein kinase cAMP-activated catalytic subunit beta [Source:HGNC Symbol;Acc:HGNC:9381]                  | 2.0870671  |
| PRKAR1A     | protein kinase cAMP-dependent type I regulatory subunit alpha [Source:HGNC Symbol;Acc:HGNC:9388]         | -1.0741287 |
| PRKCD       | protein kinase C delta [Source:HGNC Symbol;Acc:HGNC:9399]                                                | -1.8098637 |
| PRKCE       | protein kinase C epsilon [Source:HGNC Symbol;Acc:HGNC:9401]                                              | 1.539213   |
| PRKCH       | protein kinase C eta [Source:HGNC Symbol;Acc:HGNC:9403]                                                  | 1.2702664  |
| PRKCI       | protein kinase C iota [Source:HGNC Symbol;Acc:HGNC:9404]                                                 | 1.3324362  |
| PRKCK       | protein kinase C theta [Source:HGNC Symbol;Acc:HGNC:9410]                                                | 1.0667999  |
| PRKCSH      | protein kinase C substrate 80K-H [Source:HGNC Symbol;Acc:HGNC:9411]                                      | 1.3278368  |
| PRKD2       | protein kinase D2 [Source:HGNC Symbol;Acc:HGNC:17293]                                                    | -1.4493564 |
| PRKG2       | protein kinase, cGMP-dependent, type II [Source:HGNC Symbol;Acc:HGNC:9416]                               | 1.1287003  |
| PRKRIR      | THAP domain containing 12                                                                                | 1.1619819  |
| PRLR        | prolactin receptor [Source:HGNC Symbol;Acc:HGNC:9446]                                                    | 1.1165869  |
| PRM1        | protamine 1 [Source:HGNC Symbol;Acc:HGNC:9447]                                                           | -1.0934547 |
| PRMT1       | protein arginine methyltransferase 1 [Source:HGNC Symbol;Acc:HGNC:5187]                                  | -1.1144887 |
| PRMT2       | protein arginine methyltransferase 2 [Source:HGNC Symbol;Acc:HGNC:5186]                                  | -1.108796  |
| PRMT3       | protein arginine methyltransferase 3 [Source:HGNC Symbol;Acc:HGNC:30163]                                 | 1.2014946  |
| PRMT5       | protein arginine methyltransferase 5 [Source:HGNC Symbol;Acc:HGNC:10894]                                 | -1.1139424 |
| PRMT6       | protein arginine methyltransferase 6 [Source:HGNC Symbol;Acc:HGNC:18241]                                 | 1.1238465  |
| PRO0471     | uncharacterized LOC28994                                                                                 | 1.0943657  |
| PRO0611     | PRO0611 protein                                                                                          | 1.0776019  |
| PROCR       | protein C receptor [Source:HGNC Symbol;Acc:HGNC:9452]                                                    | 1.1413561  |
| PRODH       | proline dehydrogenase 1 [Source:HGNC Symbol;Acc:HGNC:9453]                                               | -1.1985888 |
| ProSAPI1    | leucine zipper tumor suppressor family member 3                                                          | -1.254513  |

|           |                                                                                               |             |
|-----------|-----------------------------------------------------------------------------------------------|-------------|
| PRPF18    | pre-mRNA processing factor 18 [Source:HGNC Symbol;Acc:HGNC:17351]                             | 1.3307501   |
| PRPF6     | pre-mRNA processing factor 6 [Source:HGNC Symbol;Acc:HGNC:15860]                              | -1.0603973  |
| PRR18     | proline rich 18 [Source:HGNC Symbol;Acc:HGNC:28574]                                           | -1.1312983  |
| PRR23B    | proline rich 23B [Source:HGNC Symbol;Acc:HGNC:33764]                                          | -1.085348   |
| PRR7      | proline rich 7 (synaptic) [Source:HGNC Symbol;Acc:HGNC:28130]                                 | 1.5090052   |
| PRRC2A    | proline rich coiled-coil 2A [Source:HGNC Symbol;Acc:HGNC:13918]                               | 1.3779577   |
| PRRG1     | proline rich and Gla domain 1 [Source:HGNC Symbol;Acc:HGNC:9469]                              | -1.2336901  |
| PRRG2     | proline rich and Gla domain 2 [Source:HGNC Symbol;Acc:HGNC:9470]                              | 1.1438161   |
| PRRG3     | proline rich and Gla domain 3 [Source:HGNC Symbol;Acc:HGNC:30798]                             | -1.1878572  |
| PRRT1     | proline rich transmembrane protein 1 [Source:HGNC Symbol;Acc:HGNC:13943]                      | -1.0999475  |
| PRRT4     | proline rich transmembrane protein 4 [Source:HGNC Symbol;Acc:HGNC:37280]                      | 1.2130818   |
| PRSS36    | protease, serine 36 [Source:HGNC Symbol;Acc:HGNC:26906]                                       | -1.1630216  |
| PRSS8     | protease, serine 8 [Source:HGNC Symbol;Acc:HGNC:9491]                                         | -1.0591403  |
| PRTG      | protogenin [Source:HGNC Symbol;Acc:HGNC:26373]                                                | 1.1733447   |
| PRTN3     | proteinase 3 [Source:HGNC Symbol;Acc:HGNC:9495]                                               | -1.130987   |
| PRUNE2    | prune homolog 2 [Source:HGNC Symbol;Acc:HGNC:25209]                                           | 1.2618607   |
| PSD2      | pleckstrin and Sec7 domain containing 2 [Source:HGNC Symbol;Acc:HGNC:19092]                   | 1.1004092   |
| PSEN1     | presenilin 1 [Source:HGNC Symbol;Acc:HGNC:9508]                                               | -1.567963   |
| PSEN2     | presenilin 2 [Source:HGNC Symbol;Acc:HGNC:9509]                                               | -1.6942778  |
| psiTPTE22 | transmembrane phosphatase with tensin homology pseudogene 1                                   | -1.074293   |
| PSMA6     | proteasome subunit alpha 6 [Source:HGNC Symbol;Acc:HGNC:9535]                                 | -1.2066969  |
| PSMB10    | proteasome subunit beta 10 [Source:HGNC Symbol;Acc:HGNC:9538]                                 | -1.2886705  |
| PSMB8     | proteasome subunit beta 8 [Source:HGNC Symbol;Acc:HGNC:9545]                                  | -1.4257451  |
| PSMB9     | proteasome subunit beta 9 [Source:HGNC Symbol;Acc:HGNC:9546]                                  | -1.4243968  |
| PSMC3     | proteasome 26S subunit, ATPase 3 [Source:HGNC Symbol;Acc:HGNC:9549]                           | 1.0500098   |
| PSMC3IP   | PSMC3 interacting protein [Source:HGNC Symbol;Acc:HGNC:17928]                                 | 1.1516057   |
| PSMD11    | proteasome 26S subunit, non-ATPase 11 [Source:HGNC Symbol;Acc:HGNC:9556]                      | 1.2300076   |
| PSMD4     | proteasome 26S subunit, non-ATPase 4 [Source:HGNC Symbol;Acc:HGNC:9561]                       | -1.0817127  |
| PSMD5     | proteasome 26S subunit, non-ATPase 5 [Source:HGNC Symbol;Acc:HGNC:9563]                       | 1.0886635   |
| PSMD9     | proteasome 26S subunit, non-ATPase 9 [Source:HGNC Symbol;Acc:HGNC:9567]                       | 1.125119    |
| PSME1     | proteasome activator subunit 1 [Source:HGNC Symbol;Acc:HGNC:9568]                             | -1.3515717  |
| PSME2     | proteasome activator subunit 2 [Source:HGNC Symbol;Acc:HGNC:9569]                             | -1.3862005  |
| PSME4     | proteasome activator subunit 4 [Source:HGNC Symbol;Acc:HGNC:20635]                            | 1.251497    |
| PSMG2     | proteasome assembly chaperone 2 [Source:HGNC Symbol;Acc:HGNC:24929]                           | -1.1941135  |
| PSPH      | phosphoserine phosphatase [Source:HGNC Symbol;Acc:HGNC:9577]                                  | 1.1632761   |
| PTAFR     | platelet activating factor receptor [Source:HGNC Symbol;Acc:HGNC:9582]                        | -1.3644845  |
| PTBP1     | polypyrimidine tract binding protein 1 [Source:HGNC Symbol;Acc:HGNC:9583]                     | -1.2254856  |
| PTCH2     | patched 2 [Source:HGNC Symbol;Acc:HGNC:9586]                                                  | -1.1322902  |
| PTCH3     | patched domain containing 3 [Source:HGNC Symbol;Acc:HGNC:24776]                               | 1.0956552   |
| PTEN      | phosphatase and tensin homolog [Source:HGNC Symbol;Acc:HGNC:9588]                             | 1.1696136   |
| PTF1A     | pancreas specific transcription factor, 1a [Source:HGNC Symbol;Acc:HGNC:23734]                | 1.1751045   |
| PTGFR     | prostaglandin F receptor [Source:HGNC Symbol;Acc:HGNC:9600]                                   | -1.2229843  |
| PTGFRN    | prostaglandin F2 receptor inhibitor [Source:HGNC Symbol;Acc:HGNC:9601]                        | -1.2263702  |
| PTGIS     | prostaglandin I2 (prostacyclin) synthase [Source:HGNC Symbol;Acc:HGNC:9603]                   | -1.1255989  |
| PTGS2     | prostaglandin-endoperoxide synthase 2 [Source:HGNC Symbol;Acc:HGNC:9605]                      | -1.4346144  |
| PTH1H     | parathyroid hormone like hormone [Source:HGNC Symbol;Acc:HGNC:9607]                           | -1.216422   |
| PTP4A1    | protein tyrosine phosphatase type IVA, member 1 [Source:HGNC Symbol;Acc:HGNC:9634]            | 1.2091388   |
| PTP4A2    | protein tyrosine phosphatase type IVA, member 2 [Source:HGNC Symbol;Acc:HGNC:9635]            | 1.2856109   |
| PTPLA     | 3-hydroxyacyl-CoA dehydratase 1                                                               | -1.0671303  |
| PTPN20B   | protein tyrosine phosphatase, non-receptor type 20                                            | -1.07132435 |
| PTPN3     | protein tyrosine phosphatase, non-receptor type 3 [Source:HGNC Symbol;Acc:HGNC:9655]          | 1.1272525   |
| PTPRF     | protein tyrosine phosphatase, receptor type F [Source:HGNC Symbol;Acc:HGNC:9670]              | -1.131666   |
| PTPRK     | protein tyrosine phosphatase, receptor type K [Source:HGNC Symbol;Acc:HGNC:9674]              | -1.37492985 |
| PTPRM     | protein tyrosine phosphatase, receptor type M [Source:HGNC Symbol;Acc:HGNC:9675]              | -1.2529433  |
| PTPRN2    | protein tyrosine phosphatase, receptor type N2 [Source:HGNC Symbol;Acc:HGNC:9677]             | 1.0979127   |
| PTPRS     | protein tyrosine phosphatase, receptor type S [Source:HGNC Symbol;Acc:HGNC:9681]              | -1.1809596  |
| PTPRT     | protein tyrosine phosphatase, receptor type T [Source:HGNC Symbol;Acc:HGNC:9682]              | 1.1026493   |
| PTPRVP    | protein tyrosine phosphatase, receptor type V, pseudogene [Source:HGNC Symbol;Acc:HGNC:13421] | 1.1104845   |
| PTTG1     | pituitary tumor-transforming 1 [Source:HGNC Symbol;Acc:HGNC:9690]                             | -1.0639142  |
| PTTG1IP   | pituitary tumor-transforming 1 interacting protein [Source:HGNC Symbol;Acc:HGNC:13524]        | -1.2765256  |
| PTTG2     | pituitary tumor-transforming 2 [Source:HGNC Symbol;Acc:HGNC:9691]                             | 1.1118758   |
| PUS1      | pseudouridylate synthase 1 [Source:HGNC Symbol;Acc:HGNC:15508]                                | 1.1251047   |
| PUS10     | pseudouridylate synthase 10 [Source:HGNC Symbol;Acc:HGNC:26505]                               | 1.0638803   |
| PUS3      | pseudouridylate synthase 3 [Source:HGNC Symbol;Acc:HGNC:25461]                                | 1.2649394   |
| PUS7L     | pseudouridylate synthase 7 like [Source:HGNC Symbol;Acc:HGNC:25276]                           | 1.1140956   |
| PVR       | poliovirus receptor [Source:HGNC Symbol;Acc:HGNC:9705]                                        | -1.3686592  |
| PVRL2     | nectin cell adhesion molecule 2                                                               | -1.275217   |
| PVRL3     | nectin cell adhesion molecule 3                                                               | 1.5390055   |
| PVT1      | Pvt1 oncogene (non-protein coding) [Source:HGNC Symbol;Acc:HGNC:9709]                         | -1.2852803  |
| PWRN2     | Prader-Willi region non-protein coding RNA 2 [Source:HGNC Symbol;Acc:HGNC:33236]              | 1.092489    |
| PXDN      | peroxidasin [Source:HGNC Symbol;Acc:HGNC:14966]                                               | -1.24636355 |
| PXMP4     | peroxisomal membrane protein 4 [Source:HGNC Symbol;Acc:HGNC:15920]                            | 1.1793512   |
| PXN       | paxillin [Source:HGNC Symbol;Acc:HGNC:9718]                                                   | 1.4310409   |
| PYCR1     | pyrroline-5-carboxylate reductase-like [Source:HGNC Symbol;Acc:HGNC:25846]                    | 1.2244414   |
| PYGB      | phosphorylase, glycogen; brain [Source:HGNC Symbol;Acc:HGNC:9723]                             | 1.2334601   |
| PYGO1     | pygopus family PHD finger 1 [Source:HGNC Symbol;Acc:HGNC:30256]                               | 1.2473793   |
| QARS      | glutaminyl-tRNA synthetase [Source:HGNC Symbol;Acc:HGNC:9751]                                 | -1.1252935  |
| QKI       | QKI, KH domain containing RNA binding [Source:HGNC Symbol;Acc:HGNC:21100]                     | -1.0712098  |
| QRSL1     | glutaminyl-tRNA synthase (glutamine-hydrolyzing)-like 1 [Source:HGNC Symbol;Acc:HGNC:21020]   | 1.078503    |
| R3HDM2    | R3H domain containing 2 [Source:HGNC Symbol;Acc:HGNC:29167]                                   | 1.0525253   |
| RAB10     | RAB10, member RAS oncogene family [Source:HGNC Symbol;Acc:HGNC:9759]                          | 1.2290475   |
| RAB11FIP4 | RAB11 family interacting protein 4 [Source:HGNC Symbol;Acc:HGNC:30267]                        | -1.1446735  |
| RAB12     | RAB12, member RAS oncogene family [Source:HGNC Symbol;Acc:HGNC:31332]                         | -1.63504765 |
| RAB13     | RAB13, member RAS oncogene family [Source:HGNC Symbol;Acc:HGNC:9762]                          | -1.1494269  |
| RAB14     | RAB14, member RAS oncogene family [Source:HGNC Symbol;Acc:HGNC:16524]                         | 1.1026078   |
| RAB19     | RAB19, member RAS oncogene family [Source:HGNC Symbol;Acc:HGNC:19982]                         | -1.1146326  |

|            |                                                                                                    |              |
|------------|----------------------------------------------------------------------------------------------------|--------------|
| RAB1B      | RAB1B, member RAS oncogene family [Source:HGNC Symbol;Acc:HGNC:18370]                              | 1.801651     |
| RAB25      | RAB25, member RAS oncogene family [Source:HGNC Symbol;Acc:HGNC:18238]                              | 1.1034021    |
| RAB28      | RAB28, member RAS oncogene family [Source:HGNC Symbol;Acc:HGNC:9768]                               | 1.1453584    |
| RAB2B      | RAB2B, member RAS oncogene family [Source:HGNC Symbol;Acc:HGNC:20246]                              | -1.2159598   |
| RAB35      | RAB35, member RAS oncogene family [Source:HGNC Symbol;Acc:HGNC:9774]                               | -1.0605818   |
| RAB38      | RAB38, member RAS oncogene family [Source:HGNC Symbol;Acc:HGNC:9776]                               | -1.278485    |
| RAB3A      | RAB3A, member RAS oncogene family [Source:HGNC Symbol;Acc:HGNC:9777]                               | 1.2566376    |
| RAB3B      | RAB3B, member RAS oncogene family [Source:HGNC Symbol;Acc:HGNC:9778]                               | 1.0797741    |
| RAB3C      | RAB3C, member RAS oncogene family [Source:HGNC Symbol;Acc:HGNC:30269]                              | -1.1289219   |
| RAB7B      | RAB7B, member RAS oncogene family [Source:HGNC Symbol;Acc:HGNC:30513]                              | 1.0883194    |
| RAB7L1     | RAB29, member RAS oncogene family                                                                  | -1.2832674   |
| RAB9BP1    | RAB9B, member RAS oncogene family pseudogene 1 [Source:HGNC Symbol;Acc:HGNC:9793]                  | -1.2524675   |
| RABEPK     | Rab9 effector protein with kelch motifs [Source:HGNC Symbol;Acc:HGNC:16896]                        | -1.3201813   |
| RABGAP1L   | RAB GTPase activating protein 1 like [Source:HGNC Symbol;Acc:HGNC:24663]                           | 1.1952218    |
| RABL2A     | RAB, member of RAS oncogene family-like 2A [Source:HGNC Symbol;Acc:HGNC:9799]                      | -1.112319267 |
| RABL2B     | RAB, member of RAS oncogene family-like 2B [Source:HGNC Symbol;Acc:HGNC:9800]                      | -1.1966829   |
| RAD1       | RAD1 checkpoint DNA exonuclease [Source:HGNC Symbol;Acc:HGNC:9806]                                 | -1.2265265   |
| RAD21      | RAD21 cohesin complex component [Source:HGNC Symbol;Acc:HGNC:9811]                                 | 1.4785478    |
| RAD51AP1   | RAD51 associated protein 1 [Source:HGNC Symbol;Acc:HGNC:16956]                                     | 1.3344936    |
| RAD51C     | RAD51 paralogue C [Source:HGNC Symbol;Acc:HGNC:9820]                                               | 1.1059057    |
| RAD51D     | RAD51 paralogue D [Source:HGNC Symbol;Acc:HGNC:9823]                                               | -1.1348433   |
| RAD54L     | RAD54-like (S. cerevisiae) [Source:HGNC Symbol;Acc:HGNC:9826]                                      | 1.1402247    |
| RADIL      | Rap associating with DIL domain [Source:HGNC Symbol;Acc:HGNC:22226]                                | -1.3268523   |
| RAE1       | ribonucleic acid export 1 [Source:HGNC Symbol;Acc:HGNC:9828]                                       | -1.1300287   |
| RAGE       | MOK protein kinase                                                                                 | -1.2160566   |
| RAI1       | retinoic acid induced 1 [Source:HGNC Symbol;Acc:HGNC:9834]                                         | -1.1390872   |
| RALGSP1    | Ral GEF with PH domain and SH3 binding motif 1 [Source:HGNC Symbol;Acc:HGNC:16851]                 | -1.1327692   |
| RALYL      | RALY RNA binding protein-like [Source:HGNC Symbol;Acc:HGNC:27036]                                  | 1.12957865   |
| RAMP3      | receptor activity modifying protein 3 [Source:HGNC Symbol;Acc:HGNC:9845]                           | -1.1163145   |
| RANBP10    | RAN binding protein 10 [Source:HGNC Symbol;Acc:HGNC:29285]                                         | -1.5057667   |
| RANBP2     | RAN binding protein 2 [Source:HGNC Symbol;Acc:HGNC:9848]                                           | 1.4194016    |
| RANBP3     | RAN binding protein 3 [Source:HGNC Symbol;Acc:HGNC:9850]                                           | 1.1505704    |
| RANBP9     | RAN binding protein 9 [Source:HGNC Symbol;Acc:HGNC:13727]                                          | -1.1893266   |
| RAP1GAP    | RAP1 GTPase activating protein [Source:HGNC Symbol;Acc:HGNC:9858]                                  | 1.1266047    |
| RAP1GDS1   | Rap1 GTPase-GDP dissociation stimulator 1 [Source:HGNC Symbol;Acc:HGNC:9859]                       | 1.1494986    |
| RAP2B      | RAP2B, member of RAS oncogene family [Source:HGNC Symbol;Acc:HGNC:9862]                            | 1.1527528    |
| RAP2C      | RAP2C, member of RAS oncogene family [Source:HGNC Symbol;Acc:HGNC:21165]                           | -1.1698175   |
| RAPGEF1    | Rap guanine nucleotide exchange factor 1 [Source:HGNC Symbol;Acc:HGNC:4568]                        | -1.1994383   |
| RAPGEF3    | Rap guanine nucleotide exchange factor 3 [Source:HGNC Symbol;Acc:HGNC:16629]                       | -1.1288518   |
| RAPGEF5    | Rap guanine nucleotide exchange factor 5 [Source:HGNC Symbol;Acc:HGNC:16862]                       | -1.0508581   |
| RAPH1      | is association (RalGDS/AF-6) and pleckstrin homology domains 1 [Source:HGNC Symbol;Acc:HGNC:1443]  | -1.3143218   |
| RAPSN      | receptor associated protein of the synapse [Source:HGNC Symbol;Acc:HGNC:9863]                      | -1.1202495   |
| RARA       | retinoic acid receptor alpha [Source:HGNC Symbol;Acc:HGNC:9864]                                    | 1.4296079    |
| RARG       | retinoic acid receptor gamma [Source:HGNC Symbol;Acc:HGNC:9866]                                    | 1.3348132    |
| RASA4      | RAS p21 protein activator 4 [Source:HGNC Symbol;Acc:HGNC:23181]                                    | -1.24145195  |
| RASAL2     | RAS protein activator like 2 [Source:HGNC Symbol;Acc:HGNC:9874]                                    | 1.0799102    |
| RASD1      | ras related dexamethasone induced 1 [Source:HGNC Symbol;Acc:HGNC:15828]                            | -1.3344815   |
| RASGEF1A   | RasGEF domain family member 1A [Source:HGNC Symbol;Acc:HGNC:24246]                                 | -1.1047115   |
| RASGEF1C   | RasGEF domain family member 1C [Source:HGNC Symbol;Acc:HGNC:27400]                                 | -1.1015      |
| RASL10B    | RAS like family 10 member B [Source:HGNC Symbol;Acc:HGNC:30295]                                    | 1.3759699    |
| RASL11B    | RAS like family 11 member B [Source:HGNC Symbol;Acc:HGNC:23804]                                    | 1.1099755    |
| RASSF1     | Ras association domain family member 1 [Source:HGNC Symbol;Acc:HGNC:9882]                          | -1.3333485   |
| RASSF2     | Ras association domain family member 2 [Source:HGNC Symbol;Acc:HGNC:9883]                          | -1.5431599   |
| RASSF7     | Ras association domain family member 7 [Source:HGNC Symbol;Acc:HGNC:1166]                          | 1.1906923    |
| RBBP6      | RB binding protein 6, ubiquitin ligase [Source:HGNC Symbol;Acc:HGNC:9889]                          | -1.2015558   |
| RBKS       | ribokinase [Source:HGNC Symbol;Acc:HGNC:30325]                                                     | -1.1442403   |
| RBM12      | RNA binding motif protein 12 [Source:HGNC Symbol;Acc:HGNC:9898]                                    | 1.2351298    |
| RBM14      | RNA binding motif protein 14 [Source:HGNC Symbol;Acc:HGNC:14219]                                   | -1.1553562   |
| RBM14-RBM4 | RBM14-RBM4 readthrough [Source:HGNC Symbol;Acc:HGNC:38840]                                         | 1.0829846    |
| RBM22      | RNA binding motif protein 22 [Source:HGNC Symbol;Acc:HGNC:25503]                                   | -1.3336023   |
| RBM23      | RNA binding motif protein 23 [Source:HGNC Symbol;Acc:HGNC:20155]                                   | -1.194606    |
| RBM27      | RNA binding motif protein 27 [Source:HGNC Symbol;Acc:HGNC:29243]                                   | 1.5047793    |
| RBM33      | RNA binding motif protein 33 [Source:HGNC Symbol;Acc:HGNC:27223]                                   | -1.118730667 |
| RBM38      | RNA binding motif protein 38 [Source:HGNC Symbol;Acc:HGNC:15818]                                   | -1.6868588   |
| RBM41      | RNA binding motif protein 41 [Source:HGNC Symbol;Acc:HGNC:25617]                                   | 1.1215496    |
| RBM44      | RNA binding motif protein 44 [Source:HGNC Symbol;Acc:HGNC:24756]                                   | -1.1119523   |
| RBM45      | RNA binding motif protein 45 [Source:HGNC Symbol;Acc:HGNC:24468]                                   | 1.1784016    |
| RBM4B      | RNA binding motif protein 4B [Source:HGNC Symbol;Acc:HGNC:28842]                                   | 1.172716     |
| RBMY1B     | RNA binding motif protein, Y-linked, family 1, member B [Source:HGNC Symbol;Acc:HGNC:23914]        | 1.0639497    |
| RBP1       | retinol binding protein 1 [Source:HGNC Symbol;Acc:HGNC:9919]                                       | -1.2721735   |
| RBP3       | retinol binding protein 3 [Source:HGNC Symbol;Acc:HGNC:9921]                                       | 1.1597089    |
| RBP4       | retinol binding protein 4 [Source:HGNC Symbol;Acc:HGNC:9922]                                       | 1.1438098    |
| RBPJ       | mbination signal binding protein for immunoglobulin kappa J region [Source:HGNC Symbol;Acc:HGNC:5] | 1.4767572    |
| RC3H2      | ring finger and CCH-type domains 2 [Source:HGNC Symbol;Acc:HGNC:21461]                             | 1.631932     |
| RCAN1      | regulator of calcineurin 1 [Source:HGNC Symbol;Acc:HGNC:3040]                                      | -1.6188667   |
| RCAN2      | regulator of calcineurin 2 [Source:HGNC Symbol;Acc:HGNC:3041]                                      | -1.1152011   |
| RCC2       | regulator of chromosome condensation 2 [Source:HGNC Symbol;Acc:HGNC:30297]                         | -1.1822382   |
| RCL1       | RNA terminal phosphate cyclase like 1 [Source:HGNC Symbol;Acc:HGNC:17687]                          | 1.421357     |
| RCOR2      | REST corepressor 2 [Source:HGNC Symbol;Acc:HGNC:27455]                                             | 1.2995554    |
| RDX        | radixin [Source:HGNC Symbol;Acc:HGNC:9944]                                                         | -1.2025448   |
| RECQL4     | RecQ like helicase 4 [Source:HGNC Symbol;Acc:HGNC:9949]                                            | 1.2493951    |
| REEP3      | receptor accessory protein 3 [Source:HGNC Symbol;Acc:HGNC:23711]                                   | 1.1288784    |
| REG1A      | regenerating family member 1 alpha [Source:HGNC Symbol;Acc:HGNC:9951]                              | -1.1179345   |
| REG1B      | regenerating family member 1 beta [Source:HGNC Symbol;Acc:HGNC:9952]                               | -1.1666206   |
| REG3A      | regenerating family member 3 alpha [Source:HGNC Symbol;Acc:HGNC:8601]                              | -1.1383637   |
| REL        | REL proto-oncogene, NF-kB subunit [Source:HGNC Symbol;Acc:HGNC:9954]                               | -1.4343128   |

|         |                                                                                                     |              |
|---------|-----------------------------------------------------------------------------------------------------|--------------|
| RELA    | RELA proto-oncogene, NF-kB subunit [Source:HGNC Symbol;Acc:HGNC:9955]                               | -1.4517273   |
| RELL1   | RELT like 1 [Source:HGNC Symbol;Acc:HGNC:27379]                                                     | -1.65665905  |
| RELT    | RELT tumor necrosis factor receptor [Source:HGNC Symbol;Acc:HGNC:13764]                             | -1.6056762   |
| REPIN1  | replication initiator 1 [Source:HGNC Symbol;Acc:HGNC:17922]                                         | -1.146611    |
| REPS1   | RALBP1 associated Eps domain containing 1 [Source:HGNC Symbol;Acc:HGNC:15578]                       | 1.4419588    |
| REPS2   | RALBP1 associated Eps domain containing 2 [Source:HGNC Symbol;Acc:HGNC:9963]                        | -1.126643    |
| RERE    | arginine-glutamic acid dipeptide repeats [Source:HGNC Symbol;Acc:HGNC:9965]                         | -1.2547234   |
| RERG    | RAS like estrogen regulated growth inhibitor [Source:HGNC Symbol;Acc:HGNC:15980]                    | -1.2908804   |
| RETN    | resistin [Source:HGNC Symbol;Acc:HGNC:20389]                                                        | 1.1744215    |
| RFC1    | replication factor C subunit 1 [Source:HGNC Symbol;Acc:HGNC:9969]                                   | 1.5744472    |
| RFC2    | replication factor C subunit 2 [Source:HGNC Symbol;Acc:HGNC:9970]                                   | -1.1823457   |
| RFC3    | replication factor C subunit 3 [Source:HGNC Symbol;Acc:HGNC:9971]                                   | 1.187361     |
| RFC4    | replication factor C subunit 4 [Source:HGNC Symbol;Acc:HGNC:9972]                                   | 1.2885237    |
| RFFL    | finger and FYVE-like domain containing E3 ubiquitin protein ligase [Source:HGNC Symbol;Acc:HGNC:24] | -1.3523805   |
| RFK     | riboflavin kinase [Source:HGNC Symbol;Acc:HGNC:30324]                                               | 1.2307153    |
| RFPL4B  | ret finger protein like 4B [Source:HGNC Symbol;Acc:HGNC:33264]                                      | 1.0892528    |
| RFT1    | RFT1 homolog [Source:HGNC Symbol;Acc:HGNC:30220]                                                    | -1.0759046   |
| RFTN1   | raftlin, lipid raft linker 1 [Source:HGNC Symbol;Acc:HGNC:30278]                                    | -1.2059972   |
| RFX3    | regulatory factor X3 [Source:HGNC Symbol;Acc:HGNC:9984]                                             | -1.1510642   |
| RFX5    | regulatory factor X5 [Source:HGNC Symbol;Acc:HGNC:9986]                                             | -1.5581308   |
| RFX8    | RFX family member 8, lacking RFX DNA binding domain [Source:HGNC Symbol;Acc:HGNC:37253]             | -1.1445566   |
| RG9MTD1 | tRNA methyltransferase 10C, mitochondrial RNase P subunit                                           | 1.5117532    |
| RGAG4   | retrotransposon gag domain containing 4 [Source:HGNC Symbol;Acc:HGNC:29430]                         | -1.495805    |
| RGMB    | repulsive guidance molecule family member b [Source:HGNC Symbol;Acc:HGNC:26896]                     | -1.2085315   |
| RGNEF   | Rho guanine nucleotide exchange factor 28                                                           | 1.2227029    |
| RGPD1   | RANBP2-like and GRIP domain containing 1 [Source:HGNC Symbol;Acc:HGNC:32414]                        | 1.0972469    |
| RGR     | retinal G protein coupled receptor [Source:HGNC Symbol;Acc:HGNC:9990]                               | -1.0757536   |
| RG514   | regulator of G-protein signaling 14 [Source:HGNC Symbol;Acc:HGNC:9996]                              | 1.2254087    |
| RGS16   | regulator of G-protein signaling 16 [Source:HGNC Symbol;Acc:HGNC:9997]                              | -1.131075    |
| RGS3    | regulator of G-protein signaling 3 [Source:HGNC Symbol;Acc:HGNC:9999]                               | -1.8004479   |
| RG54    | regulator of G-protein signaling 4 [Source:HGNC Symbol;Acc:HGNC:10000]                              | 1.2698575    |
| RGS6    | regulator of G-protein signaling 6 [Source:HGNC Symbol;Acc:HGNC:10002]                              | 1.0752645    |
| RHBDF1  | rhomboid 5 homolog 1 [Source:HGNC Symbol;Acc:HGNC:20561]                                            | -1.3012015   |
| RHBDF2  | rhomboid 5 homolog 2 [Source:HGNC Symbol;Acc:HGNC:20788]                                            | -2.2712052   |
| RHBDL2  | rhomboid like 2 [Source:HGNC Symbol;Acc:HGNC:16083]                                                 | -1.39831535  |
| RHEBL1  | Ras homolog enriched in brain like 1 [Source:HGNC Symbol;Acc:HGNC:21166]                            | -1.3419379   |
| RHOB    | ras homolog family member B [Source:HGNC Symbol;Acc:HGNC:668]                                       | -1.52579835  |
| RHOBTB1 | Rho related BTB domain containing 1 [Source:HGNC Symbol;Acc:HGNC:18738]                             | 1.3036652    |
| RHOBTB2 | Rho related BTB domain containing 2 [Source:HGNC Symbol;Acc:HGNC:18756]                             | 1.724029     |
| RHOBTB3 | Rho related BTB domain containing 3 [Source:HGNC Symbol;Acc:HGNC:18757]                             | 1.2937769    |
| RHOF    | ras homolog family member F, filopodia associated [Source:HGNC Symbol;Acc:HGNC:15703]               | -1.2287095   |
| RHOG    | ras homolog family member G [Source:HGNC Symbol;Acc:HGNC:672]                                       | -1.2134145   |
| RHOV    | ras homolog family member V [Source:HGNC Symbol;Acc:HGNC:18313]                                     | -1.1789336   |
| RIBC1   | RIB43A domain with coiled-coils 1 [Source:HGNC Symbol;Acc:HGNC:26537]                               | -1.06599     |
| RILPL2  | Rab interacting lysosomal protein like 2 [Source:HGNC Symbol;Acc:HGNC:28787]                        | -1.1802472   |
| RIMBP3  | RIMS binding protein 3 [Source:HGNC Symbol;Acc:HGNC:29344]                                          | 1.5299807    |
| RIMKLA  | ribosomal modification protein rimk like family member A [Source:HGNC Symbol;Acc:HGNC:28725]        | -1.0862191   |
| RIMSL3  | regulating synaptic membrane exocytosis 3 [Source:HGNC Symbol;Acc:HGNC:21292]                       | -1.0589024   |
| RIN1    | Ras and Rab interactor 1 [Source:HGNC Symbol;Acc:HGNC:18749]                                        | 2.1459193    |
| RIN2    | Ras and Rab interactor 2 [Source:HGNC Symbol;Acc:HGNC:18750]                                        | -2.1623456   |
| RINL    | Ras and Rab interactor like [Source:HGNC Symbol;Acc:HGNC:24795]                                     | 1.2944311    |
| RIOK2   | RIO kinase 2 [Source:HGNC Symbol;Acc:HGNC:18999]                                                    | 1.417384     |
| RIPK2   | receptor interacting serine/threonine kinase 2 [Source:HGNC Symbol;Acc:HGNC:10020]                  | -4.11816     |
| RIPK3   | receptor interacting serine/threonine kinase 3 [Source:HGNC Symbol;Acc:HGNC:10021]                  | -1.0710562   |
| RM1I    | RecQ mediated genome instability 1 [Source:HGNC Symbol;Acc:HGNC:25764]                              | 1.5255411    |
| RNA5E1  | ribonuclease A family member 1, pancreatic [Source:HGNC Symbol;Acc:HGNC:10044]                      | 1.1199994    |
| RNA5E7  | ribonuclease A family member 7 [Source:HGNC Symbol;Acc:HGNC:19278]                                  | -1.1191915   |
| RNA5E9  | ribonuclease A family member 9 (inactive) [Source:HGNC Symbol;Acc:HGNC:20673]                       | 1.0902382    |
| RNA5E11 | ribonuclease H1 [Source:HGNC Symbol;Acc:HGNC:18466]                                                 | -1.0920646   |
| RND1    | Rho family GTPase 1 [Source:HGNC Symbol;Acc:HGNC:18314]                                             | -2.500136    |
| RND3    | Rho family GTPase 3 [Source:HGNC Symbol;Acc:HGNC:671]                                               | 2.1681395    |
| RNF112  | ring finger protein 112 [Source:HGNC Symbol;Acc:HGNC:12968]                                         | 1.1857562    |
| RNF113A | ring finger protein 113A [Source:HGNC Symbol;Acc:HGNC:12974]                                        | 1.1455426    |
| RNF113B | ring finger protein 113B [Source:HGNC Symbol;Acc:HGNC:17267]                                        | 1.1847668    |
| RNF121  | ring finger protein 121 [Source:HGNC Symbol;Acc:HGNC:21070]                                         | -1.22433     |
| RNF122  | ring finger protein 122 [Source:HGNC Symbol;Acc:HGNC:21147]                                         | -1.3467888   |
| RNF126  | ring finger protein 126 [Source:HGNC Symbol;Acc:HGNC:21151]                                         | 1.1591399    |
| RNF13   | ring finger protein 13 [Source:HGNC Symbol;Acc:HGNC:10057]                                          | 1.3462169    |
| RNF130  | ring finger protein 130 [Source:HGNC Symbol;Acc:HGNC:18280]                                         | -1.1361308   |
| RNF138  | ring finger protein 138 [Source:HGNC Symbol;Acc:HGNC:17765]                                         | 1.2717316    |
| RNF144B | ring finger protein 144B [Source:HGNC Symbol;Acc:HGNC:21578]                                        | 1.2810583    |
| RNF145  | ring finger protein 145 [Source:HGNC Symbol;Acc:HGNC:20853]                                         | -1.0762523   |
| RNF150  | ring finger protein 150 [Source:HGNC Symbol;Acc:HGNC:23138]                                         | 1.0907253    |
| RNF152  | ring finger protein 152 [Source:HGNC Symbol;Acc:HGNC:26811]                                         | 1.7127714    |
| RNF166  | ring finger protein 166 [Source:HGNC Symbol;Acc:HGNC:28856]                                         | 1.2659713    |
| RNF167  | ring finger protein 167 [Source:HGNC Symbol;Acc:HGNC:24544]                                         | 1.25197575   |
| RNF168  | ring finger protein 168 [Source:HGNC Symbol;Acc:HGNC:26661]                                         | 1.0536687    |
| RNF169  | ring finger protein 169 [Source:HGNC Symbol;Acc:HGNC:26961]                                         | 1.1386145    |
| RNF17   | ring finger protein 17 [Source:HGNC Symbol;Acc:HGNC:10060]                                          | 1.1399482    |
| RNF19B  | ring finger protein 19B [Source:HGNC Symbol;Acc:HGNC:26886]                                         | -1.4921013   |
| RNF2    | ring finger protein 2 [Source:HGNC Symbol;Acc:HGNC:10061]                                           | 1.2109352    |
| RNF207  | ring finger protein 207 [Source:HGNC Symbol;Acc:HGNC:32947]                                         | -1.679059433 |
| RNF212  | ring finger protein 212 [Source:HGNC Symbol;Acc:HGNC:27729]                                         | -1.1356851   |
| RNF214  | ring finger protein 214 [Source:HGNC Symbol;Acc:HGNC:25335]                                         | -1.1261632   |
| RNF216L | ring finger protein 216 pseudogene 1                                                                | -1.1690171   |
| RNF219  | ring finger protein 219 [Source:HGNC Symbol;Acc:HGNC:20308]                                         | 1.8364041    |

|          |                                                                                                     |              |
|----------|-----------------------------------------------------------------------------------------------------|--------------|
| RNF220   | ring finger protein 220 [Source:HGNC Symbol;Acc:HGNC:25552]                                         | -1.1685171   |
| RNF24    | ring finger protein 24 [Source:HGNC Symbol;Acc:HGNC:13779]                                          | -1.5495422   |
| RNF40    | ring finger protein 40 [Source:HGNC Symbol;Acc:HGNC:16867]                                          | 1.2349421    |
| RNF44    | ring finger protein 44 [Source:HGNC Symbol;Acc:HGNC:19180]                                          | 1.1546203    |
| RNGTT    | RNA guanylyltransferase and 5'-phosphatase [Source:HGNC Symbol;Acc:HGNC:10073]                      | 1.2414063    |
| RNH1     | ribonuclease/angiogenin inhibitor 1 [Source:HGNC Symbol;Acc:HGNC:10074]                             | -1.1248939   |
| RNPC3    | RNA binding region (RNP1, RRM) containing 3 [Source:HGNC Symbol;Acc:HGNC:18666]                     | 1.1122326    |
| RNPEP    | arginyl aminopeptidase [Source:HGNC Symbol;Acc:HGNC:10078]                                          | 1.0825993    |
| ROBO2    | roundabout guidance receptor 2 [Source:HGNC Symbol;Acc:HGNC:10250]                                  | -1.0873826   |
| ROR2     | receptor tyrosine kinase like orphan receptor 2 [Source:HGNC Symbol;Acc:HGNC:10257]                 | -1.0713011   |
| RP1L1    | retinitis pigmentosa 1-like 1 [Source:HGNC Symbol;Acc:HGNC:15946]                                   | -1.1441281   |
| RPAIN    | RPA interacting protein [Source:HGNC Symbol;Acc:HGNC:28641]                                         | 1.0552642    |
| RPF1     | ribosome production factor 1 homolog [Source:HGNC Symbol;Acc:HGNC:30350]                            | 1.1810331    |
| RPF2     | ribosome production factor 2 homolog [Source:HGNC Symbol;Acc:HGNC:20870]                            | 1.2993562    |
| RPIA     | ribose 5-phosphate isomerase A [Source:HGNC Symbol;Acc:HGNC:10297]                                  | 1.2135935    |
| RPL23    | ribosomal protein L23 [Source:HGNC Symbol;Acc:HGNC:10316]                                           | -1.2232064   |
| RPL23AP7 | ribosomal protein L23a pseudogene 7 [Source:HGNC Symbol;Acc:HGNC:17336]                             | -1.1754092   |
| RPL29    | ribosomal protein L29 [Source:HGNC Symbol;Acc:HGNC:10331]                                           | 1.07397595   |
| RPL29P2  | ribosomal protein L29 pseudogene 2 [Source:HGNC Symbol;Acc:HGNC:17334]                              | 1.1060773    |
| RPL32P3  | ribosomal protein L32 pseudogene 3 [Source:HGNC Symbol;Acc:HGNC:27024]                              | -1.1229272   |
| RPL7AP37 | ribosomal protein L7a pseudogene 37                                                                 | 1.1404786    |
| RPP30    | ribonuclease P/MRP subunit p30 [Source:HGNC Symbol;Acc:HGNC:17688]                                  | -1.1435267   |
| RPP38    | ribonuclease P/MRP subunit p38 [Source:HGNC Symbol;Acc:HGNC:30329]                                  | -1.1579903   |
| RPRD1A   | regulation of nuclear pre-mRNA domain containing 1A [Source:HGNC Symbol;Acc:HGNC:25560]             | 1.3453406    |
| RPRD2    | regulation of nuclear pre-mRNA domain containing 2 [Source:HGNC Symbol;Acc:HGNC:29039]              | 1.28579215   |
| RPRML    | reprimo like [Source:HGNC Symbol;Acc:HGNC:32422]                                                    | 1.06371795   |
| RPS14    | ribosomal protein S14 [Source:HGNC Symbol;Acc:HGNC:10387]                                           | -1.1270045   |
| RPS2     | ribosomal protein S2 [Source:HGNC Symbol;Acc:HGNC:10404]                                            | 1.1649574    |
| RPS6KA2  | ribosomal protein S6 kinase A2 [Source:HGNC Symbol;Acc:HGNC:10431]                                  | -1.410639667 |
| RPS6KA3  | ribosomal protein S6 kinase A3 [Source:HGNC Symbol;Acc:HGNC:10432]                                  | -1.0556641   |
| RPS6KA5  | ribosomal protein S6 kinase A5 [Source:HGNC Symbol;Acc:HGNC:10434]                                  | 1.4956322    |
| RPS6KL1  | ribosomal protein S6 kinase like 1 [Source:HGNC Symbol;Acc:HGNC:20222]                              | -1.3123137   |
| RPSAP52  | ribosomal protein SA pseudogene 52 [Source:HGNC Symbol;Acc:HGNC:35752]                              | -1.1133547   |
| RPUSD4   | RNA pseudouridylate synthase domain containing 4 [Source:HGNC Symbol;Acc:HGNC:25898]                | -1.1648445   |
| RQCD1    | CCR4-NOT transcription complex subunit 9                                                            | -1.2591312   |
| RRAD     | AD, Ras related glycolysis inhibitor and calcium channel regulator [Source:HGNC Symbol;Acc:HGNC:104 | -2.3344486   |
| RRAGA    | Ras related GTP binding A [Source:HGNC Symbol;Acc:HGNC:16963]                                       | -1.3039336   |
| RRAGB    | Ras related GTP binding B [Source:HGNC Symbol;Acc:HGNC:19901]                                       | 1.1105382    |
| RRAS2    | related RAS viral (r-ras) oncogene homolog 2 [Source:HGNC Symbol;Acc:HGNC:17271]                    | 1.2920831    |
| RRBP1    | ribosome binding protein 1 [Source:HGNC Symbol;Acc:HGNC:10448]                                      | -1.3017266   |
| RRM1     | ribonucleotide reductase catalytic subunit M1 [Source:HGNC Symbol;Acc:HGNC:10451]                   | 1.2725685    |
| RRN3     | RRN3 homolog, RNA polymerase I transcription factor [Source:HGNC Symbol;Acc:HGNC:30346]             | -1.1194341   |
| RRP8     | ribosomal RNA processing 8, methyltransferase, homolog (yeast) [Source:HGNC Symbol;Acc:HGNC:29031]  | 1.1276213    |
| RRS1     | ribosome biogenesis regulator homolog [Source:HGNC Symbol;Acc:HGNC:17083]                           | 1.281741     |
| RSAD1    | radical S-adenosyl methionine domain containing 1 [Source:HGNC Symbol;Acc:HGNC:25634]               | 1.3272914    |
| RSBN1L   | round spermatid basic protein 1 like [Source:HGNC Symbol;Acc:HGNC:24765]                            | 1.3462671    |
| RSPH1    | radial spoke head 1 homolog [Source:HGNC Symbol;Acc:HGNC:12371]                                     | -1.0606655   |
| RSPH4A   | radial spoke head 4 homolog A [Source:HGNC Symbol;Acc:HGNC:21558]                                   | 1.1570005    |
| RSPQ3    | R-spondin 3 [Source:HGNC Symbol;Acc:HGNC:20866]                                                     | -1.2142001   |
| RTBDN    | retbindin [Source:HGNC Symbol;Acc:HGNC:30310]                                                       | -1.1535487   |
| RTDR1    | radial spoke head 14 homolog                                                                        | -1.1295856   |
| RTKN     | rothekin [Source:HGNC Symbol;Acc:HGNC:10466]                                                        | 1.174732     |
| RTKN2    | rothekin 2 [Source:HGNC Symbol;Acc:HGNC:19364]                                                      | -1.0647374   |
| RTN3     | reticulon 3 [Source:HGNC Symbol;Acc:HGNC:10469]                                                     | -1.2339903   |
| RTN4IP1  | reticulon 4 interacting protein 1 [Source:HGNC Symbol;Acc:HGNC:18647]                               | 1.1477271    |
| RTN4RL2  | reticulon 4 receptor-like 2 [Source:HGNC Symbol;Acc:HGNC:23053]                                     | -1.1881436   |
| RTP4     | receptor transporter protein 4 [Source:HGNC Symbol;Acc:HGNC:23992]                                  | -1.7279081   |
| RUFY4    | RUN and FYVE domain containing 4 [Source:HGNC Symbol;Acc:HGNC:24804]                                | -1.1594365   |
| RUNDC3B  | RUN domain containing 3B [Source:HGNC Symbol;Acc:HGNC:30286]                                        | 1.1152334    |
| RUNX1    | runt related transcription factor 1 [Source:HGNC Symbol;Acc:HGNC:10471]                             | -1.22274345  |
| RUNX1T1  | RUNX1 translocation partner 1 [Source:HGNC Symbol;Acc:HGNC:1535]                                    | 2.3893292    |
| RUVBL2   | RuvB like AAA ATPase 2 [Source:HGNC Symbol;Acc:HGNC:10475]                                          | -1.1188267   |
| RWDD1    | RWD domain containing 1 [Source:HGNC Symbol;Acc:HGNC:20993]                                         | 1.2436431    |
| RWDD2A   | RWD domain containing 2A [Source:HGNC Symbol;Acc:HGNC:21385]                                        | -1.1700553   |
| RXRA     | retinoid X receptor alpha [Source:HGNC Symbol;Acc:HGNC:10477]                                       | 1.088242     |
| RXRB     | retinoid X receptor beta [Source:HGNC Symbol;Acc:HGNC:10478]                                        | 1.1835409    |
| RYR3     | ryanodine receptor 3 [Source:HGNC Symbol;Acc:HGNC:10485]                                            | -1.1246238   |
| S100A12  | S100 calcium binding protein A12 [Source:HGNC Symbol;Acc:HGNC:10489]                                | -1.0570798   |
| S100A3   | S100 calcium binding protein A3 [Source:HGNC Symbol;Acc:HGNC:10493]                                 | -5.924905    |
| S100G    | S100 calcium binding protein G [Source:HGNC Symbol;Acc:HGNC:1436]                                   | 1.099018     |
| S100P    | S100 calcium binding protein P [Source:HGNC Symbol;Acc:HGNC:10504]                                  | -1.1783785   |
| S1PR1    | sphingosine-1-phosphate receptor 1 [Source:HGNC Symbol;Acc:HGNC:3165]                               | -1.8234551   |
| S1PR2    | sphingosine-1-phosphate receptor 2 [Source:HGNC Symbol;Acc:HGNC:3169]                               | -1.8879114   |
| SAA1     | serum amyloid A1 [Source:HGNC Symbol;Acc:HGNC:10513]                                                | -1.0723135   |
| SAMD12   | sterile alpha motif domain containing 12 [Source:HGNC Symbol;Acc:HGNC:31750]                        | 1.1758848    |
| SAMD14   | sterile alpha motif domain containing 14 [Source:HGNC Symbol;Acc:HGNC:27312]                        | -1.8836696   |
| SAMD4A   | sterile alpha motif domain containing 4A [Source:HGNC Symbol;Acc:HGNC:23023]                        | -2.029286833 |
| SAMD4B   | sterile alpha motif domain containing 4B [Source:HGNC Symbol;Acc:HGNC:25492]                        | 1.3907033    |
| SAMD8    | sterile alpha motif domain containing 8 [Source:HGNC Symbol;Acc:HGNC:26320]                         | -1.2904165   |
| SAMD9    | sterile alpha motif domain containing 9 [Source:HGNC Symbol;Acc:HGNC:1348]                          | 1.1131039    |
| SAMM50   | SAMM50 sorting and assembly machinery component [Source:HGNC Symbol;Acc:HGNC:24276]                 | 1.09371      |
| SAP30BP  | SAP30 binding protein [Source:HGNC Symbol;Acc:HGNC:30785]                                           | -1.153906    |
| SARDH    | sarcosine dehydrogenase [Source:HGNC Symbol;Acc:HGNC:10536]                                         | -1.194814    |
| SARS     | seryl-tRNA synthetase [Source:HGNC Symbol;Acc:HGNC:10537]                                           | 1.0871358    |
| SASH1    | SAM and SH3 domain containing 1 [Source:HGNC Symbol;Acc:HGNC:19182]                                 | 1.6712207    |
| SASS6    | SAS-6 centriolar assembly protein [Source:HGNC Symbol;Acc:HGNC:25403]                               | 1.3084991    |

|           |                                                                                                 |              |
|-----------|-------------------------------------------------------------------------------------------------|--------------|
| SAT1      | spermidine/spermine N1-acetyltransferase 1 [Source:HGNC Symbol;Acc:HGNC:10540]                  | -1.714093733 |
| SAT2      | spermidine/spermine N1-acetyltransferase family member 2 [Source:HGNC Symbol;Acc:HGNC:23160]    | 1.2109832    |
| SATB1     | SATB homeobox 1 [Source:HGNC Symbol;Acc:HGNC:10541]                                             | 1.096392     |
| SAV1      | salvador family WW domain containing protein 1 [Source:HGNC Symbol;Acc:HGNC:17795]              | -2.4822557   |
| SBK1      | SH3 domain binding kinase 1 [Source:HGNC Symbol;Acc:HGNC:17699]                                 | 1.0506829    |
| SBN02     | strawberry notch homolog 2 [Source:HGNC Symbol;Acc:HGNC:29158]                                  | -1.8019269   |
| SBSN      | suprabasin [Source:HGNC Symbol;Acc:HGNC:24950]                                                  | 1.0709168    |
| SCAF1     | SR-related CTD associated factor 1 [Source:HGNC Symbol;Acc:HGNC:30403]                          | 1.3098054    |
| SCAMP2    | secretory carrier membrane protein 2 [Source:HGNC Symbol;Acc:HGNC:10564]                        | -1.1602647   |
| SCAMP3    | secretory carrier membrane protein 3 [Source:HGNC Symbol;Acc:HGNC:10565]                        | -1.1221188   |
| SCAN02    | SCAN domain containing 2 pseudogene                                                             | -1.1989627   |
| SCARA3    | scavenger receptor class A member 3 [Source:HGNC Symbol;Acc:HGNC:19000]                         | -1.0940439   |
| SCARB1    | scavenger receptor class B member 1 [Source:HGNC Symbol;Acc:HGNC:1664]                          | 1.2331651    |
| SCARB2    | scavenger receptor class B member 2 [Source:HGNC Symbol;Acc:HGNC:1665]                          | 1.3289002    |
| SCARF1    | scavenger receptor class F member 1 [Source:HGNC Symbol;Acc:HGNC:16820]                         | -1.4201542   |
| SCARNA9L  | small Cajal body-specific RNA 9-like                                                            | -1.1707532   |
| SCD5      | stearoyl-CoA desaturase 5 [Source:HGNC Symbol;Acc:HGNC:21088]                                   | -1.1308806   |
| SCG2      | secretogranin II [Source:HGNC Symbol;Acc:HGNC:10575]                                            | 1.0515409    |
| SCGB2A2   | secretoglobin family 2A member 2 [Source:HGNC Symbol;Acc:HGNC:7050]                             | 1.1288807    |
| SCLY      | selenocysteine lyase [Source:HGNC Symbol;Acc:HGNC:18161]                                        | 1.1541694    |
| SCML1     | sex comb on midleg-like 1 (Drosophila) [Source:HGNC Symbol;Acc:HGNC:10580]                      | 1.1293019    |
| SCML4     | sex comb on midleg-like 4 (Drosophila) [Source:HGNC Symbol;Acc:HGNC:21397]                      | 1.0655712    |
| SCN1B     | sodium voltage-gated channel beta subunit 1 [Source:HGNC Symbol;Acc:HGNC:10586]                 | 1.4391778    |
| SCN2B     | sodium voltage-gated channel beta subunit 2 [Source:HGNC Symbol;Acc:HGNC:10589]                 | -1.4855578   |
| SCN4A     | sodium voltage-gated channel alpha subunit 4 [Source:HGNC Symbol;Acc:HGNC:10591]                | -1.1423026   |
| SCN4B     | sodium voltage-gated channel beta subunit 4 [Source:HGNC Symbol;Acc:HGNC:10592]                 | 1.0738896    |
| SCN5A     | sodium voltage-gated channel alpha subunit 5 [Source:HGNC Symbol;Acc:HGNC:10593]                | 1.2273055    |
| SCN8A     | sodium voltage-gated channel alpha subunit 8 [Source:HGNC Symbol;Acc:HGNC:10596]                | -1.156236    |
| SCNN1B    | sodium channel epithelial 1 beta subunit [Source:HGNC Symbol;Acc:HGNC:10600]                    | 1.1492671    |
| SCO1      | SCO1 cytochrome c oxidase assembly protein [Source:HGNC Symbol;Acc:HGNC:10603]                  | 1.1552103    |
| SCRN3     | secernin 3 [Source:HGNC Symbol;Acc:HGNC:30382]                                                  | 1.086931     |
| SCR71     | scratch family transcriptional repressor 1 [Source:HGNC Symbol;Acc:HGNC:15950]                  | 1.0859209    |
| SCYL1     | SCY1 like pseudokinase 1 [Source:HGNC Symbol;Acc:HGNC:14372]                                    | -1.1542336   |
| SCYL2     | SCY1 like pseudokinase 2 [Source:HGNC Symbol;Acc:HGNC:19286]                                    | 1.1025493    |
| SDC1      | syndecan 1 [Source:HGNC Symbol;Acc:HGNC:10658]                                                  | 1.2037464    |
| SDC4      | syndecan 4 [Source:HGNC Symbol;Acc:HGNC:10661]                                                  | -3.5583906   |
| SDCCAG8   | serologically defined colon cancer antigen 8 [Source:HGNC Symbol;Acc:HGNC:10671]                | 1.18331875   |
| SDHA      | succinate dehydrogenase complex flavoprotein subunit A [Source:HGNC Symbol;Acc:HGNC:10680]      | -1.0608532   |
| SDHAF2    | succinate dehydrogenase complex assembly factor 2 [Source:HGNC Symbol;Acc:HGNC:26034]           | -1.0815994   |
| SDHAF3    | succinate dehydrogenase complex assembly factor 3                                               | 1.2237418    |
| SDHD      | succinate dehydrogenase complex subunit D [Source:HGNC Symbol;Acc:HGNC:10683]                   | 1.1616831    |
| SDK2      | sidekick cell adhesion molecule 2 [Source:HGNC Symbol;Acc:HGNC:19308]                           | 1.087193     |
| SEBOX     | SEBOX homeobox [Source:HGNC Symbol;Acc:HGNC:32942]                                              | -1.1378819   |
| SEC11C    | SEC11 homolog C, signal peptidase complex subunit [Source:HGNC Symbol;Acc:HGNC:23400]           | -1.1608229   |
| SEC14L2   | SEC14 like lipid binding 2 [Source:HGNC Symbol;Acc:HGNC:10699]                                  | -1.3377573   |
| SEC16B    | SEC16 homolog B, endoplasmic reticulum export factor [Source:HGNC Symbol;Acc:HGNC:30301]        | 1.0731544    |
| SEC22C    | SEC22 homolog C, vesicle trafficking protein [Source:HGNC Symbol;Acc:HGNC:16828]                | -1.1578892   |
| SEC23B    | Sec23 homolog B, coat complex II component [Source:HGNC Symbol;Acc:HGNC:10702]                  | -1.32401675  |
| SEC24A    | SEC24 homolog A, COPII coat complex component [Source:HGNC Symbol;Acc:HGNC:10703]               | -1.4126457   |
| SEC31B    | SEC31 homolog B, COPII coat complex component [Source:HGNC Symbol;Acc:HGNC:23197]               | -1.1160028   |
| SEC62     | SEC62 homolog, preprotein translocation factor [Source:HGNC Symbol;Acc:HGNC:11846]              | 1.2161474    |
| SECISBP2L | SECIS binding protein 2 like [Source:HGNC Symbol;Acc:HGNC:28997]                                | 1.0905099    |
| SEL1L     | SEL1L ERAD E3 ligase adaptor subunit [Source:HGNC Symbol;Acc:HGNC:10717]                        | 1.18132965   |
| SELE      | selectin E [Source:HGNC Symbol;Acc:HGNC:10718]                                                  | -50.88709    |
| SELENBP1  | selenium binding protein 1 [Source:HGNC Symbol;Acc:HGNC:10719]                                  | -1.1793039   |
| SELM      | selenoprotein M                                                                                 | -1.6307195   |
| SELT      | selenoprotein T                                                                                 | 1.3112134    |
| SEMA3F    | semaphorin 3F [Source:HGNC Symbol;Acc:HGNC:10728]                                               | 1.4922091    |
| SEMA3G    | semaphorin 3G [Source:HGNC Symbol;Acc:HGNC:30400]                                               | 1.2153898    |
| SEMA4A    | semaphorin 4A [Source:HGNC Symbol;Acc:HGNC:10729]                                               | -1.2179706   |
| SEMA4B    | semaphorin 4B [Source:HGNC Symbol;Acc:HGNC:10730]                                               | -1.3499597   |
| SEMA4C    | semaphorin 4C [Source:HGNC Symbol;Acc:HGNC:10731]                                               | -1.5851582   |
| SEMA4D    | semaphorin 4D [Source:HGNC Symbol;Acc:HGNC:10732]                                               | 1.1410433    |
| SEMA6B    | semaphorin 6B [Source:HGNC Symbol;Acc:HGNC:10739]                                               | 1.327658     |
| SEMA6C    | semaphorin 6C [Source:HGNC Symbol;Acc:HGNC:10740]                                               | 1.3072208    |
| SEMA6D    | semaphorin 6D [Source:HGNC Symbol;Acc:HGNC:16770]                                               | 1.1215733    |
| SENP1     | SUMO1/sentrin specific peptidase 1 [Source:HGNC Symbol;Acc:HGNC:17927]                          | 1.2220706    |
| SEPHS2    | selenophosphate synthetase 2 [Source:HGNC Symbol;Acc:HGNC:19686]                                | 1.2815186    |
| SEPN1     | selenoprotein N, 1 [Source:HGNC Symbol;Acc:HGNC:15999]                                          | 1.1940587    |
| SEPP1     | selenoprotein P, plasma, 1 [Source:HGNC Symbol;Acc:HGNC:10751]                                  | -1.1888655   |
| SEPSECS   | ep (O-phosphoserine) tRNA:Sec (selenocysteine) tRNA synthase [Source:HGNC Symbol;Acc:HGNC:3060] | -1.0557537   |
| SEPW1     | selenoprotein W, 1 [Source:HGNC Symbol;Acc:HGNC:10752]                                          | 1.2385434    |
| SERF1A    | small EDRK-rich factor 1A [Source:HGNC Symbol;Acc:HGNC:10755]                                   | -1.353089    |
| SERINC5   | serine incorporator 5 [Source:HGNC Symbol;Acc:HGNC:18825]                                       | -1.1235372   |
| SERPINA1  | serpin family A member 1 [Source:HGNC Symbol;Acc:HGNC:8941]                                     | -1.222883    |
| SERPINA3  | serpin family A member 3 [Source:HGNC Symbol;Acc:HGNC:16]                                       | -1.1721622   |
| SERPINB13 | serpin family B member 13 [Source:HGNC Symbol;Acc:HGNC:8944]                                    | -1.2347697   |
| SERPINB2  | serpin family B member 2 [Source:HGNC Symbol;Acc:HGNC:8584]                                     | -1.6792448   |
| SERPINB8  | serpin family B member 8 [Source:HGNC Symbol;Acc:HGNC:8952]                                     | -1.6072087   |
| SERPIND1  | serpin family D member 1 [Source:HGNC Symbol;Acc:HGNC:4838]                                     | -1.6149043   |
| SERPINE1  | serpin family E member 1 [Source:HGNC Symbol;Acc:HGNC:8583]                                     | -1.8878003   |
| SERPINH1  | serpin family H member 1 [Source:HGNC Symbol;Acc:HGNC:1546]                                     | 1.0907226    |
| SERTA03   | SERTA domain containing 3 [Source:HGNC Symbol;Acc:HGNC:17931]                                   | 1.233979     |
| SERTA04   | SERTA domain containing 4 [Source:HGNC Symbol;Acc:HGNC:25236]                                   | 1.382674     |
| SESN2     | sestrin 2 [Source:HGNC Symbol;Acc:HGNC:20746]                                                   | -1.1368705   |
| SETD5     | SET domain containing 5 [Source:HGNC Symbol;Acc:HGNC:25566]                                     | -1.0661584   |

|            |                                                                                                  |              |
|------------|--------------------------------------------------------------------------------------------------|--------------|
| SETD7      | SET domain containing lysine methyltransferase 7 [Source:HGNC Symbol;Acc:HGNC:30412]             | 1.2369637    |
| SETDB2     | SET domain bifurcated 2 [Source:HGNC Symbol;Acc:HGNC:20263]                                      | 1.644999     |
| SF1        | splicing factor 1 [Source:HGNC Symbol;Acc:HGNC:12950]                                            | 1.087913     |
| SF3A1      | splicing factor 3a subunit 1 [Source:HGNC Symbol;Acc:HGNC:10765]                                 | -1.2357739   |
| SF3B4      | splicing factor 3b subunit 4 [Source:HGNC Symbol;Acc:HGNC:10771]                                 | 1.6588527    |
| SFI1       | SFI1 centrin binding protein [Source:HGNC Symbol;Acc:HGNC:29064]                                 | 1.1352545    |
| SGK1       | serum/glucocorticoid regulated kinase 1 [Source:HGNC Symbol;Acc:HGNC:10810]                      | -1.4778552   |
| SGK223     | PEAK1 related kinase activating pseudokinase 1                                                   | 1.915186     |
| SGPL1      | sphingosine-1-phosphate lyase 1 [Source:HGNC Symbol;Acc:HGNC:10817]                              | -1.8910965   |
| SH2B2      | SH2B adaptor protein 2 [Source:HGNC Symbol;Acc:HGNC:17381]                                       | 1.3455522    |
| SH2D7      | SH2 domain containing 7 [Source:HGNC Symbol;Acc:HGNC:34549]                                      | 1.1383865    |
| SH3D21     | SH3 domain containing 21 [Source:HGNC Symbol;Acc:HGNC:26236]                                     | -1.1510593   |
| SH3GL1     | SH3 domain containing GRB2 like 1, endophilin A2 [Source:HGNC Symbol;Acc:HGNC:10830]             | 1.2145821    |
| SH3GL1P2   | H3 domain containing GRB2 like 1, endophilin A2 pseudogene 2 [Source:HGNC Symbol;Acc:HGNC:10831] | 1.34683085   |
| SH3GL1P3   | H3 domain containing GRB2 like 1, endophilin A2 pseudogene 3 [Source:HGNC Symbol;Acc:HGNC:10833] | 1.4997866    |
| SH3PXD2B   | SH3 and PX domains 2B [Source:HGNC Symbol;Acc:HGNC:29242]                                        | 1.2531106    |
| SH3RF3     | SH3 domain containing ring finger 3 [Source:HGNC Symbol;Acc:HGNC:24699]                          | -1.42392935  |
| SH3TC1     | SH3 domain and tetratricopeptide repeats 1 [Source:HGNC Symbol;Acc:HGNC:26009]                   | -1.651052033 |
| SH3TC2     | SH3 domain and tetratricopeptide repeats 2 [Source:HGNC Symbol;Acc:HGNC:29427]                   | 1.223008     |
| SHANK3     | SH3 and multiple ankyrin repeat domains 3 [Source:HGNC Symbol;Acc:HGNC:14294]                    | 1.4359393    |
| SHARPIN    | SHANK associated RH domain interactor [Source:HGNC Symbol;Acc:HGNC:25321]                        | 1.2940657    |
| SHB        | SH2 domain containing adaptor protein B [Source:HGNC Symbol;Acc:HGNC:10838]                      | -2.0696073   |
| SHBG       | sex hormone binding globulin [Source:HGNC Symbol;Acc:HGNC:10839]                                 | -1.0776646   |
| SHC3       | SHC adaptor protein 3 [Source:HGNC Symbol;Acc:HGNC:18181]                                        | 1.1981919    |
| SHE        | Src homology 2 domain containing E [Source:HGNC Symbol;Acc:HGNC:27004]                           | 1.6982174    |
| SHISA2     | shisa family member 2 [Source:HGNC Symbol;Acc:HGNC:20366]                                        | 1.3395536    |
| SHISA3     | shisa family member 3 [Source:HGNC Symbol;Acc:HGNC:25159]                                        | 1.4962261    |
| SHKBP1     | SH3KBP1 binding protein 1 [Source:HGNC Symbol;Acc:HGNC:19214]                                    | 1.2659011    |
| SHMT1      | serine hydroxymethyltransferase 1 [Source:HGNC Symbol;Acc:HGNC:10850]                            | -1.0853193   |
| SHPRH      | SNF2 histone linker PHD RING helicase [Source:HGNC Symbol;Acc:HGNC:19336]                        | 1.5827359    |
| SHQ1       | SHQ1, H/ACA ribonucleoprotein assembly factor [Source:HGNC Symbol;Acc:HGNC:25543]                | -1.1409504   |
| SHROOM2    | shroom family member 2 [Source:HGNC Symbol;Acc:HGNC:630]                                         | -1.5547401   |
| SHROOM3    | shroom family member 3 [Source:HGNC Symbol;Acc:HGNC:30422]                                       | 1.1722264    |
| SHAH1      | shah E3 ubiquitin protein ligase 1 [Source:HGNC Symbol;Acc:HGNC:10857]                           | -1.2271664   |
| SHAH2      | shah E3 ubiquitin protein ligase 2 [Source:HGNC Symbol;Acc:HGNC:10858]                           | -1.0817205   |
| SIGLEC1    | sialic acid binding Ig like lectin 1 [Source:HGNC Symbol;Acc:HGNC:11127]                         | 1.088942     |
| SIGLEC16   | sialic acid binding Ig like lectin 16 (gene/pseudogene) [Source:HGNC Symbol;Acc:HGNC:24851]      | -1.2795612   |
| SIGLEC5    | sialic acid binding Ig like lectin 5 [Source:HGNC Symbol;Acc:HGNC:10874]                         | -1.0702451   |
| SIGMAR1    | sigma non-opioid intracellular receptor 1 [Source:HGNC Symbol;Acc:HGNC:8157]                     | 1.1126697    |
| SIK1       | salt inducible kinase 1 [Source:HGNC Symbol;Acc:HGNC:11142]                                      | -1.4303672   |
| SIK2       | salt inducible kinase 2 [Source:HGNC Symbol;Acc:HGNC:21680]                                      | -1.5103676   |
| SIM1       | single-minded family bHLH transcription factor 1 [Source:HGNC Symbol;Acc:HGNC:10882]             | -1.1851674   |
| SIN3A      | SIN3 transcription regulator family member A [Source:HGNC Symbol;Acc:HGNC:19353]                 | -1.3092691   |
| SIP1       | SR-related CTD associated factor 11                                                              | 1.1136341    |
| SIRPA      | signal regulatory protein alpha [Source:HGNC Symbol;Acc:HGNC:9662]                               | 1.1174405    |
| SIRPB1     | signal regulatory protein beta 1 [Source:HGNC Symbol;Acc:HGNC:15928]                             | -1.1935005   |
| SIRT2      | sirtuin 2 [Source:HGNC Symbol;Acc:HGNC:10886]                                                    | 1.4460858    |
| SIX5       | SIX homeobox 5 [Source:HGNC Symbol;Acc:HGNC:10891]                                               | -1.3978463   |
| SKA1       | spindle and kinetochore associated complex subunit 1 [Source:HGNC Symbol;Acc:HGNC:28109]         | -1.3619052   |
| SKA3       | spindle and kinetochore associated complex subunit 3 [Source:HGNC Symbol;Acc:HGNC:20262]         | 1.2582046    |
| SKIV2L2    | Ski2 like RNA helicase 2 [Source:HGNC Symbol;Acc:HGNC:18734]                                     | 1.5425587    |
| SKP1       | S-phase kinase-associated protein 1 [Source:HGNC Symbol;Acc:HGNC:10899]                          | 1.2975101    |
| SLAMF1     | signaling lymphocytic activation molecule family member 1 [Source:HGNC Symbol;Acc:HGNC:10903]    | -1.4317615   |
| SLAMF8     | SLAM family member 8 [Source:HGNC Symbol;Acc:HGNC:21391]                                         | -1.1951581   |
| SLC10A4    | solute carrier family 10 member 4 [Source:HGNC Symbol;Acc:HGNC:22980]                            | 1.0998561    |
| SLC11A2    | solute carrier family 11 member 2 [Source:HGNC Symbol;Acc:HGNC:10908]                            | -1.2158426   |
| SLC12A7    | solute carrier family 12 member 7 [Source:HGNC Symbol;Acc:HGNC:10915]                            | -3.9705856   |
| SLC12A9    | solute carrier family 12 member 9 [Source:HGNC Symbol;Acc:HGNC:17435]                            | 1.3560034    |
| SLC13A2    | solute carrier family 13 member 2 [Source:HGNC Symbol;Acc:HGNC:10917]                            | -1.1065593   |
| SLC14A1    | solute carrier family 14 member 1 (Kidd blood group) [Source:HGNC Symbol;Acc:HGNC:10918]         | 1.128409     |
| SLC14A2    | solute carrier family 14 member 2 [Source:HGNC Symbol;Acc:HGNC:10919]                            | -1.2378604   |
| SLC15A3    | solute carrier family 15 member 3 [Source:HGNC Symbol;Acc:HGNC:18068]                            | -2.4775558   |
| SLC15A4    | solute carrier family 15 member 4 [Source:HGNC Symbol;Acc:HGNC:23090]                            | -1.6239801   |
| SLC16A4    | solute carrier family 16 member 4 [Source:HGNC Symbol;Acc:HGNC:10925]                            | -1.117493    |
| SLC16A9    | solute carrier family 16 member 9 [Source:HGNC Symbol;Acc:HGNC:23520]                            | -1.2664418   |
| SLC17A2    | solute carrier family 17 member 2 [Source:HGNC Symbol;Acc:HGNC:10930]                            | 1.0911045    |
| SLC17A3    | solute carrier family 17 member 3 [Source:HGNC Symbol;Acc:HGNC:10931]                            | -1.087898    |
| SLC17A5    | solute carrier family 17 member 5 [Source:HGNC Symbol;Acc:HGNC:10933]                            | -1.3112874   |
| SLC18A3    | solute carrier family 18 member A3 [Source:HGNC Symbol;Acc:HGNC:10936]                           | -1.2391266   |
| SLC1A1     | solute carrier family 1 member 1 [Source:HGNC Symbol;Acc:HGNC:10939]                             | 1.4851477    |
| SLC1A2     | solute carrier family 1 member 2 [Source:HGNC Symbol;Acc:HGNC:10940]                             | 1.159159     |
| SLC1A3     | solute carrier family 1 member 3 [Source:HGNC Symbol;Acc:HGNC:10941]                             | -1.1486062   |
| SLC20A1    | solute carrier family 20 member 1 [Source:HGNC Symbol;Acc:HGNC:10946]                            | 1.8247638    |
| SLC20A2    | solute carrier family 20 member 2 [Source:HGNC Symbol;Acc:HGNC:10947]                            | 1.1605104    |
| SLC22A18A5 | solute carrier family 22 member 18 antisense [Source:HGNC Symbol;Acc:HGNC:10965]                 | 1.1776129    |
| SLC22A2    | solute carrier family 22 member 2 [Source:HGNC Symbol;Acc:HGNC:10966]                            | 1.1039569    |
| SLC22A20   | solute carrier family 22 member 20 [Source:HGNC Symbol;Acc:HGNC:29867]                           | -1.19168975  |
| SLC22A23   | solute carrier family 22 member 23 [Source:HGNC Symbol;Acc:HGNC:21106]                           | -1.3922028   |
| SLC22A31   | solute carrier family 22 member 31 [Source:HGNC Symbol;Acc:HGNC:27091]                           | -1.1529076   |
| SLC22A4    | solute carrier family 22 member 4 [Source:HGNC Symbol;Acc:HGNC:10968]                            | -1.0861019   |
| SLC23A3    | solute carrier family 23 member 3 [Source:HGNC Symbol;Acc:HGNC:20601]                            | -1.13349775  |
| SLC24A1    | solute carrier family 24 member 1 [Source:HGNC Symbol;Acc:HGNC:10975]                            | -1.0706054   |
| SLC24A4    | solute carrier family 24 member 4 [Source:HGNC Symbol;Acc:HGNC:10978]                            | -1.1145053   |
| SLC24A6    | solute carrier family 8 member B1                                                                | -1.2741559   |
| SLC25A19   | solute carrier family 25 member 19 [Source:HGNC Symbol;Acc:HGNC:14409]                           | -1.1865109   |
| SLC25A23   | solute carrier family 25 member 23 [Source:HGNC Symbol;Acc:HGNC:19375]                           | 1.1812223    |

|          |                                                                                                                     |             |
|----------|---------------------------------------------------------------------------------------------------------------------|-------------|
| SLC25A26 | solute carrier family 25 member 26 [Source:HGNC Symbol;Acc:HGNC:20661]                                              | -1.0882463  |
| SLC25A28 | solute carrier family 25 member 28 [Source:HGNC Symbol;Acc:HGNC:23472]                                              | -1.3696846  |
| SLC25A30 | solute carrier family 25 member 30 [Source:HGNC Symbol;Acc:HGNC:27371]                                              | 1.6308022   |
| SLC25A32 | solute carrier family 25 member 32 [Source:HGNC Symbol;Acc:HGNC:29683]                                              | -1.3701208  |
| SLC25A34 | solute carrier family 25 member 34 [Source:HGNC Symbol;Acc:HGNC:27653]                                              | -1.3937715  |
| SLC25A37 | solute carrier family 25 member 37 [Source:HGNC Symbol;Acc:HGNC:29786]                                              | -1.370395   |
| SLC25A43 | solute carrier family 25 member 43 [Source:HGNC Symbol;Acc:HGNC:30557]                                              | -1.2309555  |
| SLC25A47 | solute carrier family 25 member 47 [Source:HGNC Symbol;Acc:HGNC:20115]                                              | -1.1311978  |
| SLC26A11 | solute carrier family 26 member 11 [Source:HGNC Symbol;Acc:HGNC:14471]                                              | -1.3529459  |
| SLC26A2  | solute carrier family 26 member 2 [Source:HGNC Symbol;Acc:HGNC:10994]                                               | 1.273453    |
| SLC26A5  | solute carrier family 26 member 5 [Source:HGNC Symbol;Acc:HGNC:9359]                                                | 1.0908985   |
| SLC26A7  | solute carrier family 26 member 7 [Source:HGNC Symbol;Acc:HGNC:14467]                                               | 1.1172166   |
| SLC26A9  | solute carrier family 26 member 9 [Source:HGNC Symbol;Acc:HGNC:14469]                                               | -1.2052923  |
| SLC28A1  | solute carrier family 28 member 1 [Source:HGNC Symbol;Acc:HGNC:11001]                                               | 1.0532773   |
| SLC29A1  | solute carrier family 29 member 1 (Augustine blood group) [Source:HGNC Symbol;Acc:HGNC:11003]                       | 1.1237997   |
| SLC29A2  | solute carrier family 29 member 2 [Source:HGNC Symbol;Acc:HGNC:11004]                                               | 1.0677754   |
| SLC29A4  | solute carrier family 29 member 4 [Source:HGNC Symbol;Acc:HGNC:23097]                                               | 1.1062043   |
| SLC2A13  | solute carrier family 2 member 13 [Source:HGNC Symbol;Acc:HGNC:15956]                                               | 1.0709485   |
| SLC2A5   | solute carrier family 2 member 5 [Source:HGNC Symbol;Acc:HGNC:11010]                                                | -1.2770567  |
| SLC2A6   | solute carrier family 2 member 6 [Source:HGNC Symbol;Acc:HGNC:11011]                                                | -2.38111955 |
| SLC30A1  | solute carrier family 30 member 1 [Source:HGNC Symbol;Acc:HGNC:11012]                                               | 1.1185017   |
| SLC30A2  | solute carrier family 30 member 2 [Source:HGNC Symbol;Acc:HGNC:11013]                                               | -1.2445333  |
| SLC30A7  | solute carrier family 30 member 7 [Source:HGNC Symbol;Acc:HGNC:19306]                                               | -1.1713142  |
| SLC31A2  | solute carrier family 31 member 2 [Source:HGNC Symbol;Acc:HGNC:11017]                                               | -3.8152761  |
| SLC34A1  | solute carrier family 34 member 1 [Source:HGNC Symbol;Acc:HGNC:11019]                                               | -1.0865018  |
| SLC35D2  | solute carrier family 35 member D2 [Source:HGNC Symbol;Acc:HGNC:20799]                                              | -1.1075573  |
| SLC35E1  | solute carrier family 35 member E1 [Source:HGNC Symbol;Acc:HGNC:20803]                                              | -1.16162115 |
| SLC35E2  | solute carrier family 35 member E2 [Source:HGNC Symbol;Acc:HGNC:20863]                                              | 1.1610974   |
| SLC35E3  | solute carrier family 35 member E3 [Source:HGNC Symbol;Acc:HGNC:20864]                                              | -1.1705283  |
| SLC35F5  | solute carrier family 35 member F5 [Source:HGNC Symbol;Acc:HGNC:23617]                                              | 1.0794834   |
| SLC36A3  | solute carrier family 36 member 3 [Source:HGNC Symbol;Acc:HGNC:19659]                                               | 1.1321479   |
| SLC37A1  | solute carrier family 37 member 1 [Source:HGNC Symbol;Acc:HGNC:11024]                                               | -1.6429214  |
| SLC38A10 | solute carrier family 38 member 10 [Source:HGNC Symbol;Acc:HGNC:28237]                                              | -1.1541848  |
| SLC38A2  | solute carrier family 38 member 2 [Source:HGNC Symbol;Acc:HGNC:13448]                                               | 1.81909475  |
| SLC39A1  | solute carrier family 39 member 1 [Source:HGNC Symbol;Acc:HGNC:12876]                                               | -1.283497   |
| SLC39A11 | solute carrier family 39 member 11 [Source:HGNC Symbol;Acc:HGNC:14463]                                              | -1.1256454  |
| SLC39A2  | solute carrier family 39 member 2 [Source:HGNC Symbol;Acc:HGNC:17127]                                               | -1.1966377  |
| SLC39A7  | solute carrier family 39 member 7 [Source:HGNC Symbol;Acc:HGNC:4927]                                                | 1.21949     |
| SLC3A1   | solute carrier family 3 member 1 [Source:HGNC Symbol;Acc:HGNC:11025]                                                | 1.2051109   |
| SLC3A2   | solute carrier family 3 member 2 [Source:HGNC Symbol;Acc:HGNC:11026]                                                | -1.1652458  |
| SLC41A1  | solute carrier family 41 member 1 [Source:HGNC Symbol;Acc:HGNC:19429]                                               | -1.8855487  |
| SLC41A2  | solute carrier family 41 member 2 [Source:HGNC Symbol;Acc:HGNC:31045]                                               | -1.5176158  |
| SLC43A1  | solute carrier family 43 member 1 [Source:HGNC Symbol;Acc:HGNC:9225]                                                | 1.3081092   |
| SLC43A2  | solute carrier family 43 member 2 [Source:HGNC Symbol;Acc:HGNC:23087]                                               | -1.2620823  |
| SLC44A1  | solute carrier family 44 member 1 [Source:HGNC Symbol;Acc:HGNC:18798]                                               | 1.3095196   |
| SLC44A3  | solute carrier family 44 member 3 [Source:HGNC Symbol;Acc:HGNC:28689]                                               | -1.0501009  |
| SLC45A1  | solute carrier family 45 member 1 [Source:HGNC Symbol;Acc:HGNC:17939]                                               | 1.0982971   |
| SLC45A3  | solute carrier family 45 member 3 [Source:HGNC Symbol;Acc:HGNC:8642]                                                | 2.0233      |
| SLC46A1  | solute carrier family 46 member 1 [Source:HGNC Symbol;Acc:HGNC:30521]                                               | 1.2280153   |
| SLC47A1  | solute carrier family 47 member 1 [Source:HGNC Symbol;Acc:HGNC:25588]                                               | -1.077101   |
| SLC47A2  | solute carrier family 47 member 2 [Source:HGNC Symbol;Acc:HGNC:26439]                                               | 1.1229268   |
| SLC48A1  | solute carrier family 48 member 1 [Source:HGNC Symbol;Acc:HGNC:26035]                                               | -1.4926559  |
| SLC4A2   | solute carrier family 4 member 2 [Source:HGNC Symbol;Acc:HGNC:11028]                                                | 1.2275552   |
| SLC4A8   | solute carrier family 4 member 8 [Source:HGNC Symbol;Acc:HGNC:11034]                                                | -1.1032156  |
| SLC50A1  | solute carrier family 50 member 1 [Source:HGNC Symbol;Acc:HGNC:30657]                                               | -1.6497064  |
| SLC5A1   | solute carrier family 5 member 1 [Source:HGNC Symbol;Acc:HGNC:11036]                                                | -1.0931611  |
| SLC5A2   | solute carrier family 5 member 2 [Source:HGNC Symbol;Acc:HGNC:11037]                                                | -1.0688126  |
| SLC6A2   | solute carrier family 6 member 2 [Source:HGNC Symbol;Acc:HGNC:11048]                                                | -1.1199039  |
| SLC6A20  | solute carrier family 6 member 20 [Source:HGNC Symbol;Acc:HGNC:30927]                                               | 1.0628656   |
| SLC6A4   | solute carrier family 6 member 4 [Source:HGNC Symbol;Acc:HGNC:11050]                                                | -1.3332648  |
| SLC6A7   | solute carrier family 6 member 7 [Source:HGNC Symbol;Acc:HGNC:11054]                                                | -1.055598   |
| SLC7A14  | solute carrier family 7 member 14 [Source:HGNC Symbol;Acc:HGNC:29326]                                               | -1.400286   |
| SLC7A2   | solute carrier family 7 member 2 [Source:HGNC Symbol;Acc:HGNC:11060]                                                | -9.099952   |
| SLC7A8   | solute carrier family 7 member 8 [Source:HGNC Symbol;Acc:HGNC:11066]                                                | 1.2073721   |
| SLC8A1   | solute carrier family 8 member A1 [Source:HGNC Symbol;Acc:HGNC:11068]                                               | -1.0831733  |
| SLC8A3   | solute carrier family 8 member A3 [Source:HGNC Symbol;Acc:HGNC:11070]                                               | -1.1240797  |
| SLC9A1   | solute carrier family 9 member A1 [Source:HGNC Symbol;Acc:HGNC:11071]                                               | -1.2156603  |
| SLC9A7P1 | solute carrier family 9 member 7 pseudogene 1 [Source:HGNC Symbol;Acc:HGNC:32679]                                   | -1.087863   |
| SLC9A8   | solute carrier family 9 member A8 [Source:HGNC Symbol;Acc:HGNC:20728]                                               | -1.3041918  |
| SLC01C1  | solute carrier organic anion transporter family member 1C1 [Source:HGNC Symbol;Acc:HGNC:13819]                      | 1.0606058   |
| SLC03A1  | solute carrier organic anion transporter family member 3A1 [Source:HGNC Symbol;Acc:HGNC:10952]                      | -1.1044437  |
| SLC04A1  | solute carrier organic anion transporter family member 4A1 [Source:HGNC Symbol;Acc:HGNC:10953]                      | -1.4484872  |
| SLIT2    | slit guidance ligand 2 [Source:HGNC Symbol;Acc:HGNC:11086]                                                          | -1.1446851  |
| SMAD1    | SMAD family member 1 [Source:HGNC Symbol;Acc:HGNC:6767]                                                             | -1.2996587  |
| SMAD3    | SMAD family member 3 [Source:HGNC Symbol;Acc:HGNC:6769]                                                             | -2.8720343  |
| SMAD6    | SMAD family member 6 [Source:HGNC Symbol;Acc:HGNC:6772]                                                             | 2.070265    |
| SMAD7    | SMAD family member 7 [Source:HGNC Symbol;Acc:HGNC:6773]                                                             | 1.8674072   |
| SMAD9    | SMAD family member 9 [Source:HGNC Symbol;Acc:HGNC:6774]                                                             | 1.3086945   |
| SMAGP    | small cell adhesion glycoprotein [Source:HGNC Symbol;Acc:HGNC:26918]                                                | 1.1212053   |
| SMAP1    | small ArfGAP 1 [Source:HGNC Symbol;Acc:HGNC:19651]                                                                  | -1.1217533  |
| SMARCA4  | atrix associated, actin dependent regulator of chromatin, subfamily a, member 4 [Source:HGNC Symbol;Acc:HGNC:10954] | -1.0932351  |
| SMARCB1  | atrix associated, actin dependent regulator of chromatin, subfamily b, member 1 [Source:HGNC Symbol;Acc:HGNC:10955] | 1.2377583   |
| SMARCE1  | atrix associated, actin dependent regulator of chromatin, subfamily e, member 1 [Source:HGNC Symbol;Acc:HGNC:10956] | 1.2623575   |
| SMEK1    | protein phosphatase 4 regulatory subunit 3A                                                                         | 1.3475604   |
| SMEK3P   | protein phosphatase 4 regulatory subunit 3C, pseudogene                                                             | 1.1270995   |
| SMG5     | SMG5, nonsense mediated mRNA decay factor [Source:HGNC Symbol;Acc:HGNC:24644]                                       | -1.1425986  |

|          |                                                                                                             |             |
|----------|-------------------------------------------------------------------------------------------------------------|-------------|
| SMG6     | SMG6, nonsense mediated mRNA decay factor [Source:HGNC Symbol;Acc:HGNC:17809]                               | 1.1846209   |
| SMG9     | SMG9, nonsense mediated mRNA decay factor [Source:HGNC Symbol;Acc:HGNC:25763]                               | -1.186066   |
| SMO      | smoothened, frizzled class receptor [Source:HGNC Symbol;Acc:HGNC:11119]                                     | 1.2351292   |
| SMOC1    | SPARC related modular calcium binding 1 [Source:HGNC Symbol;Acc:HGNC:20318]                                 | -1.1692297  |
| SMOC2    | SPARC related modular calcium binding 2 [Source:HGNC Symbol;Acc:HGNC:20323]                                 | 1.079961    |
| SMOX     | spermine oxidase [Source:HGNC Symbol;Acc:HGNC:15862]                                                        | -1.4794824  |
| SMURF1   | SMAD specific E3 ubiquitin protein ligase 1 [Source:HGNC Symbol;Acc:HGNC:16807]                             | -1.9796493  |
| SNAI1    | snail family transcriptional repressor 1 [Source:HGNC Symbol;Acc:HGNC:11128]                                | 1.7465347   |
| SNAI2    | snail family transcriptional repressor 2 [Source:HGNC Symbol;Acc:HGNC:11094]                                | 1.1152751   |
| SNAI3    | snail family transcriptional repressor 3 [Source:HGNC Symbol;Acc:HGNC:18411]                                | 1.1613162   |
| SNAP25   | synaptosome associated protein 25 [Source:HGNC Symbol;Acc:HGNC:11132]                                       | -1.077266   |
| SNAP29   | synaptosome associated protein 29 [Source:HGNC Symbol;Acc:HGNC:11133]                                       | 1.1797107   |
| SNAPC1   | small nuclear RNA activating complex polypeptide 1 [Source:HGNC Symbol;Acc:HGNC:11134]                      | 1.2312425   |
| SNAPC4   | small nuclear RNA activating complex polypeptide 4 [Source:HGNC Symbol;Acc:HGNC:11137]                      | -1.755772   |
| SNAR-E   | small ILF3/NF90-associated RNA E                                                                            | -1.0705185  |
| SDN1     | staphylococcal nuclease and tudor domain containing 1 [Source:HGNC Symbol;Acc:HGNC:30646]                   | -1.0733922  |
| SNHG12   | small nucleolar RNA host gene 12 [Source:HGNC Symbol;Acc:HGNC:30062]                                        | 1.2176762   |
| SNHG4    | small nucleolar RNA host gene 4 [Source:HGNC Symbol;Acc:HGNC:32964]                                         | 1.1724967   |
| SNHG8    | small nucleolar RNA host gene 8 [Source:HGNC Symbol;Acc:HGNC:33098]                                         | 1.173885    |
| SNN      | stannin [Source:HGNC Symbol;Acc:HGNC:11149]                                                                 | -2.515417   |
| SNORA22  | small nucleolar RNA, H/ACA box 22 [Source:HGNC Symbol;Acc:HGNC:32612]                                       | -1.1060855  |
| SNORA58  | small nucleolar RNA, H/ACA box 58 [Source:HGNC Symbol;Acc:HGNC:32652]                                       | 1.0604714   |
| SNORAC7  | small nucleolar RNA, H/ACA box 78 [Source:HGNC Symbol;Acc:HGNC:32664]                                       | -1.2393686  |
| SNORD128 | small nucleolar RNA, C/D box 12B [Source:HGNC Symbol;Acc:HGNC:33573]                                        | -1.1459838  |
| SNPH     | syntaphilin [Source:HGNC Symbol;Acc:HGNC:15931]                                                             | 1.2998594   |
| SNRK     | SNF related kinase [Source:HGNC Symbol;Acc:HGNC:30598]                                                      | 1.920905    |
| SNRNP27  | small nuclear ribonucleoprotein U4/U6.U5 subunit 27 [Source:HGNC Symbol;Acc:HGNC:30240]                     | -1.1821932  |
| SNRNP40  | small nuclear ribonucleoprotein U5 subunit 40 [Source:HGNC Symbol;Acc:HGNC:30857]                           | 1.1840714   |
| SNRPA    | small nuclear ribonucleoprotein polypeptide A [Source:HGNC Symbol;Acc:HGNC:11151]                           | 1.1525942   |
| SNRPA1   | small nuclear ribonucleoprotein polypeptide A' [Source:HGNC Symbol;Acc:HGNC:11152]                          | -1.2197748  |
| SNRPB    | small nuclear ribonucleoprotein polypeptides B and B1 [Source:HGNC Symbol;Acc:HGNC:11153]                   | 1.2685963   |
| SNRPC    | small nuclear ribonucleoprotein polypeptide C [Source:HGNC Symbol;Acc:HGNC:11157]                           | 1.0592827   |
| SNRPD1   | small nuclear ribonucleoprotein D1 polypeptide [Source:HGNC Symbol;Acc:HGNC:11158]                          | 1.1993759   |
| SNRPD3   | small nuclear ribonucleoprotein D3 polypeptide [Source:HGNC Symbol;Acc:HGNC:11160]                          | 1.2016234   |
| SNTB2    | syntrophin beta 2 [Source:HGNC Symbol;Acc:HGNC:11169]                                                       | -1.4100816  |
| SNUPN    | snurportin 1 [Source:HGNC Symbol;Acc:HGNC:14245]                                                            | -1.2416916  |
| SNX2     | sorting nexin 2 [Source:HGNC Symbol;Acc:HGNC:11173]                                                         | 1.4450452   |
| SNX24    | sorting nexin 24 [Source:HGNC Symbol;Acc:HGNC:21533]                                                        | 1.0954369   |
| SNX30    | sorting nexin family member 30 [Source:HGNC Symbol;Acc:HGNC:23685]                                          | 1.1995053   |
| SNX6     | sorting nexin 6 [Source:HGNC Symbol;Acc:HGNC:14970]                                                         | 1.2200302   |
| SNX9     | sorting nexin 9 [Source:HGNC Symbol;Acc:HGNC:14973]                                                         | -1.3864666  |
| SOBP     | sine oculis binding protein homolog [Source:HGNC Symbol;Acc:HGNC:29256]                                     | 1.4289916   |
| SOCS1    | suppressor of cytokine signaling 1 [Source:HGNC Symbol;Acc:HGNC:19383]                                      | -1.4221374  |
| SOCS2    | suppressor of cytokine signaling 2 [Source:HGNC Symbol;Acc:HGNC:19382]                                      | -1.1783967  |
| SOCS3    | suppressor of cytokine signaling 3 [Source:HGNC Symbol;Acc:HGNC:19391]                                      | 1.4182186   |
| SOCS6    | suppressor of cytokine signaling 6 [Source:HGNC Symbol;Acc:HGNC:16833]                                      | 1.1634434   |
| SOD2     | superoxide dismutase 2, mitochondrial [Source:HGNC Symbol;Acc:HGNC:11180]                                   | -2.7629724  |
| SOHLH2   | permatogenesis and oogenesis specific basic helix-loop-helix 2 [Source:HGNC Symbol;Acc:HGNC:26026]          | 1.0950915   |
| SON      | SON DNA binding protein [Source:HGNC Symbol;Acc:HGNC:11183]                                                 | -1.2067156  |
| SORBS2   | sorbin and SH3 domain containing 2 [Source:HGNC Symbol;Acc:HGNC:24098]                                      | 1.3960792   |
| SORCS3   | soritin related VPS10 domain containing receptor 3 [Source:HGNC Symbol;Acc:HGNC:16699]                      | 1.1625923   |
| SORD     | sorbitol dehydrogenase [Source:HGNC Symbol;Acc:HGNC:11184]                                                  | 1.1756208   |
| SOX1     | SRY-box 1 [Source:HGNC Symbol;Acc:HGNC:11189]                                                               | 1.1297421   |
| SOX12    | SRY-box 12 [Source:HGNC Symbol;Acc:HGNC:11198]                                                              | 1.1355515   |
| SOX13    | SRY-box 13 [Source:HGNC Symbol;Acc:HGNC:11192]                                                              | -1.2355682  |
| SOX15    | SRY-box 15 [Source:HGNC Symbol;Acc:HGNC:11196]                                                              | 1.2521343   |
| SOX17    | SRY-box 17 [Source:HGNC Symbol;Acc:HGNC:18122]                                                              | 1.2470721   |
| SOX18    | SRY-box 18 [Source:HGNC Symbol;Acc:HGNC:11194]                                                              | 1.5754496   |
| SOX2OT   | SOX2 overlapping transcript                                                                                 | 1.1706005   |
| SOX30    | SRY-box 30 [Source:HGNC Symbol;Acc:HGNC:30635]                                                              | 1.1593004   |
| SOX7     | SRY-box 7 [Source:HGNC Symbol;Acc:HGNC:18196]                                                               | -2.4292214  |
| SP1      | Sp1 transcription factor [Source:HGNC Symbol;Acc:HGNC:11205]                                                | -1.1988295  |
| SP110    | SP110 nuclear body protein [Source:HGNC Symbol;Acc:HGNC:5401]                                               | -1.1568704  |
| SP140    | SP140 nuclear body protein [Source:HGNC Symbol;Acc:HGNC:17133]                                              | -1.13882395 |
| SP2      | Sp2 transcription factor [Source:HGNC Symbol;Acc:HGNC:11207]                                                | 1.1116369   |
| SP6      | Sp6 transcription factor [Source:HGNC Symbol;Acc:HGNC:14530]                                                | -1.7814846  |
| SP8      | Sp8 transcription factor [Source:HGNC Symbol;Acc:HGNC:19196]                                                | 1.1489772   |
| SPAG17   | sperm associated antigen 17 [Source:HGNC Symbol;Acc:HGNC:26620]                                             | 1.1051317   |
| SPANXN1  | SPANX family member N1 [Source:HGNC Symbol;Acc:HGNC:33174]                                                  | 1.1521657   |
| SPATA1   | spermatogenesis associated 1 [Source:HGNC Symbol;Acc:HGNC:14682]                                            | -1.0945317  |
| SPATA2   | spermatogenesis associated 2 [Source:HGNC Symbol;Acc:HGNC:14681]                                            | -1.3791881  |
| SPATA2L  | spermatogenesis associated 2 like [Source:HGNC Symbol;Acc:HGNC:28393]                                       | -1.3247792  |
| SPATA5L1 | spermatogenesis associated 5 like 1 [Source:HGNC Symbol;Acc:HGNC:28762]                                     | -1.118301   |
| SPATA6   | spermatogenesis associated 6 [Source:HGNC Symbol;Acc:HGNC:18309]                                            | 1.1510923   |
| SPATA7   | spermatogenesis associated 7 [Source:HGNC Symbol;Acc:HGNC:20423]                                            | 1.3338883   |
| SPATA9   | spermatogenesis associated 9 [Source:HGNC Symbol;Acc:HGNC:22988]                                            | -1.0932338  |
| SPATC1   | spermatogenesis and centriole associated 1 [Source:HGNC Symbol;Acc:HGNC:30510]                              | -1.1541201  |
| SPC25    | SPC25, NDC80 kinetochore complex component [Source:HGNC Symbol;Acc:HGNC:24031]                              | 1.1633643   |
| SPECC1   | permatogenesis antigen with calponin homology and coiled-coil domains 1 [Source:HGNC Symbol;Acc:HGNC:30611] | -1.2656026  |
| SPEG     | SPEG complex locus [Source:HGNC Symbol;Acc:HGNC:16901]                                                      | -1.1496651  |
| SPG21    | spastic paraplegia 21 (autosomal recessive, Mast syndrome) [Source:HGNC Symbol;Acc:HGNC:20373]              | -1.0597708  |
| SPG7     | SPG7, paraplegin matrix AAA peptidase subunit [Source:HGNC Symbol;Acc:HGNC:11237]                           | -1.1414359  |
| SPHK1    | sphingosine kinase 1 [Source:HGNC Symbol;Acc:HGNC:11240]                                                    | -1.5180042  |
| SP1      | Spi-1 proto-oncogene [Source:HGNC Symbol;Acc:HGNC:11241]                                                    | -1.3360361  |
| SPIN3    | spindlin family member 3 [Source:HGNC Symbol;Acc:HGNC:27272]                                                | 1.0840518   |
| SPIN4    | spindlin family member 4 [Source:HGNC Symbol;Acc:HGNC:27040]                                                | 1.4123063   |

|            |                                                                                                    |            |
|------------|----------------------------------------------------------------------------------------------------|------------|
| SPINK1     | serine peptidase inhibitor, Kazal type 1 [Source:HGNC Symbol;Acc:HGNC:11244]                       | -1.1005225 |
| SPINK14    | serine peptidase inhibitor, Kazal type 14 (putative) [Source:HGNC Symbol;Acc:HGNC:33825]           | -1.0626346 |
| SPINK2     | serine peptidase inhibitor, Kazal type 2 [Source:HGNC Symbol;Acc:HGNC:11245]                       | 1.1215383  |
| SPINK8     | serine peptidase inhibitor, Kazal type 8 (putative) [Source:HGNC Symbol;Acc:HGNC:33160]            | -1.1167119 |
| SPINT4     | serine peptidase inhibitor, Kunitz type 4 [Source:HGNC Symbol;Acc:HGNC:16130]                      | 1.103353   |
| SPNS2      | sphingolipid transporter 2 [Source:HGNC Symbol;Acc:HGNC:26992]                                     | -1.7125467 |
| SPNS3      | sphingolipid transporter 3 (putative) [Source:HGNC Symbol;Acc:HGNC:28433]                          | -1.3699741 |
| SPOPL      | speckle type BTB/POZ protein like [Source:HGNC Symbol;Acc:HGNC:27934]                              | 1.3731387  |
| SPPL2B     | signal peptide peptidase like 2B [Source:HGNC Symbol;Acc:HGNC:30627]                               | 1.098127   |
| SPPL3      | signal peptide peptidase like 3 [Source:HGNC Symbol;Acc:HGNC:30424]                                | -1.0523384 |
| SPRED1     | sprouty related EVH1 domain containing 1 [Source:HGNC Symbol;Acc:HGNC:20249]                       | 1.3902912  |
| SPRED2     | sprouty related EVH1 domain containing 2 [Source:HGNC Symbol;Acc:HGNC:17722]                       | -1.1629206 |
| SPRR2C     | small proline rich protein 2C (pseudogene) [Source:HGNC Symbol;Acc:HGNC:11263]                     | -1.1278527 |
| SPRR2D     | small proline rich protein 2D [Source:HGNC Symbol;Acc:HGNC:11264]                                  | -1.0577679 |
| SPRR2E     | small proline rich protein 2E [Source:HGNC Symbol;Acc:HGNC:11265]                                  | -1.1943921 |
| SPRY1      | sprouty RTK signaling antagonist 1 [Source:HGNC Symbol;Acc:HGNC:11269]                             | 1.3469466  |
| SPRY2      | sprouty RTK signaling antagonist 2 [Source:HGNC Symbol;Acc:HGNC:11270]                             | 1.1147985  |
| SPRY3      | sprouty RTK signaling antagonist 3 [Source:HGNC Symbol;Acc:HGNC:11271]                             | -1.1297424 |
| SPRY4      | sprouty RTK signaling antagonist 4 [Source:HGNC Symbol;Acc:HGNC:15533]                             | -1.295955  |
| SPRYD4     | SPRY domain containing 4 [Source:HGNC Symbol;Acc:HGNC:27468]                                       | -1.1377538 |
| SPTA1      | spectrin alpha, erythrocytic 1 [Source:HGNC Symbol;Acc:HGNC:11272]                                 | 1.1368048  |
| SPTB       | spectrin beta, erythrocytic [Source:HGNC Symbol;Acc:HGNC:11274]                                    | 1.0735816  |
| SPTBN1     | spectrin beta, non-erythrocytic 1 [Source:HGNC Symbol;Acc:HGNC:11275]                              | -1.2001902 |
| SPTBN5     | spectrin beta, non-erythrocytic 5 [Source:HGNC Symbol;Acc:HGNC:15680]                              | -1.2231363 |
| SQRDL      | sulfide quinone reductase-like (yeast) [Source:HGNC Symbol;Acc:HGNC:20390]                         | -1.9914875 |
| SQSTM1     | sequestosome 1 [Source:HGNC Symbol;Acc:HGNC:11280]                                                 | -2.8412058 |
| SRCAP      | Snf2-related CREBBP activator protein [Source:HGNC Symbol;Acc:HGNC:16974]                          | 1.123425   |
| SREBF2     | sterol regulatory element binding transcription factor 2 [Source:HGNC Symbol;Acc:HGNC:11290]       | 1.1755402  |
| SRG7       | spermatogenesis associated 42 (non-protein coding)                                                 | 1.0715241  |
| SRGAP1     | SLIT-ROBO Rho GTPase activating protein 1 [Source:HGNC Symbol;Acc:HGNC:17382]                      | -1.6967522 |
| SRGAP2     | SLIT-ROBO Rho GTPase activating protein 2 [Source:HGNC Symbol;Acc:HGNC:19751]                      | 1.11022265 |
| SRP19      | signal recognition particle 19 [Source:HGNC Symbol;Acc:HGNC:11300]                                 | 1.1605332  |
| SRP9       | signal recognition particle 9 [Source:HGNC Symbol;Acc:HGNC:11304]                                  | 1.4022194  |
| SRPK2      | SRSF protein kinase 2 [Source:HGNC Symbol;Acc:HGNC:11306]                                          | 1.2924603  |
| SRPRB      | SRP receptor beta subunit [Source:HGNC Symbol;Acc:HGNC:24085]                                      | 1.0793916  |
| SRPX2      | sushi repeat containing protein, X-linked 2 [Source:HGNC Symbol;Acc:HGNC:30668]                    | 1.1076976  |
| SRRM2      | serine/arginine repetitive matrix 2 [Source:HGNC Symbol;Acc:HGNC:16639]                            | -1.2876629 |
| SRRM3      | serine/arginine repetitive matrix 3 [Source:HGNC Symbol;Acc:HGNC:26729]                            | 1.3769407  |
| SRRT       | serrate, RNA effector molecule [Source:HGNC Symbol;Acc:HGNC:24101]                                 | -1.1109728 |
| SRSF12     | serine and arginine rich splicing factor 12 [Source:HGNC Symbol;Acc:HGNC:21220]                    | -1.0577995 |
| SRSF8      | serine and arginine rich splicing factor 8 [Source:HGNC Symbol;Acc:HGNC:16988]                     | 1.2972506  |
| SRXN1      | sulfiredoxin 1 [Source:HGNC Symbol;Acc:HGNC:16132]                                                 | 1.1963407  |
| SSBP3      | single stranded DNA binding protein 3 [Source:HGNC Symbol;Acc:HGNC:15674]                          | -1.1203994 |
| SSBP4      | single stranded DNA binding protein 4 [Source:HGNC Symbol;Acc:HGNC:15676]                          | 1.3567343  |
| SSFA2      | sperm specific antigen 2 [Source:HGNC Symbol;Acc:HGNC:11319]                                       | 2.0738115  |
| SSH1       | slingshot protein phosphatase 1 [Source:HGNC Symbol;Acc:HGNC:30579]                                | -2.0153873 |
| SSH2       | slingshot protein phosphatase 2 [Source:HGNC Symbol;Acc:HGNC:30580]                                | -1.3045303 |
| SSH3       | slingshot protein phosphatase 3 [Source:HGNC Symbol;Acc:HGNC:30581]                                | 1.06624    |
| SSTR1      | somatostatin receptor 1 [Source:HGNC Symbol;Acc:HGNC:11330]                                        | 1.4423593  |
| SSTR2      | somatostatin receptor 2 [Source:HGNC Symbol;Acc:HGNC:11331]                                        | -1.245914  |
| SSU72      | SSU72 homolog, RNA polymerase II CTD phosphatase [Source:HGNC Symbol;Acc:HGNC:25016]               | -1.1449313 |
| SSX2       | SSX family member 2 [Source:HGNC Symbol;Acc:HGNC:11336]                                            | 1.1037519  |
| SSX7       | SSX family member 7 [Source:HGNC Symbol;Acc:HGNC:19653]                                            | 1.0840541  |
| ST3GAL1    | ST3 beta-galactoside alpha-2,3-sialyltransferase 1 [Source:HGNC Symbol;Acc:HGNC:10862]             | 1.1872938  |
| ST3GAL2    | ST3 beta-galactoside alpha-2,3-sialyltransferase 2 [Source:HGNC Symbol;Acc:HGNC:10863]             | -1.1934189 |
| ST3GAL6    | ST3 beta-galactoside alpha-2,3-sialyltransferase 6 [Source:HGNC Symbol;Acc:HGNC:18080]             | 1.3964665  |
| ST6GAL1    | ST6 beta-galactoside alpha-2,6-sialyltransferase 1 [Source:HGNC Symbol;Acc:HGNC:10860]             | -1.754508  |
| ST6GALNAC3 | ST6 N-acetylgalactosaminide alpha-2,6-sialyltransferase 3 [Source:HGNC Symbol;Acc:HGNC:19343]      | 1.3754711  |
| ST7        | suppression of tumorigenicity 7 [Source:HGNC Symbol;Acc:HGNC:11351]                                | -1.1680267 |
| ST7-AS1    | ST7 antisense RNA 1 [Source:HGNC Symbol;Acc:HGNC:16000]                                            | -1.504437  |
| ST7OT4     | ST7 overlapping transcript 4                                                                       | 1.0794348  |
| ST8SIA4    | ST8 alpha-N-acetyl-neuraminidase alpha-2,8-sialyltransferase 4 [Source:HGNC Symbol;Acc:HGNC:10871] | 1.1466286  |
| STAC2      | SH3 and cysteine rich domain 2 [Source:HGNC Symbol;Acc:HGNC:23990]                                 | -1.1196139 |
| STAP2      | signal transducing adaptor family member 2 [Source:HGNC Symbol;Acc:HGNC:30430]                     | -2.1225429 |
| STARD10    | StAR related lipid transfer domain containing 10 [Source:HGNC Symbol;Acc:HGNC:10666]               | -2.8078258 |
| STARD8     | StAR related lipid transfer domain containing 8 [Source:HGNC Symbol;Acc:HGNC:19161]                | -1.4184645 |
| STAT2      | signal transducer and activator of transcription 2 [Source:HGNC Symbol;Acc:HGNC:11363]             | 1.1347741  |
| STAT5A     | signal transducer and activator of transcription 5A [Source:HGNC Symbol;Acc:HGNC:11366]            | -3.1095648 |
| STAT5B     | signal transducer and activator of transcription 5B [Source:HGNC Symbol;Acc:HGNC:11367]            | -1.1172311 |
| STAT6      | signal transducer and activator of transcription 6 [Source:HGNC Symbol;Acc:HGNC:11368]             | -2.2853472 |
| STBD1      | starch binding domain 1 [Source:HGNC Symbol;Acc:HGNC:24854]                                        | 1.1040965  |
| STK10      | serine/threonine kinase 10 [Source:HGNC Symbol;Acc:HGNC:11388]                                     | -1.5018309 |
| STK4       | serine/threonine kinase 4 [Source:HGNC Symbol;Acc:HGNC:11408]                                      | -1.0922916 |
| STK40      | serine/threonine kinase 40 [Source:HGNC Symbol;Acc:HGNC:21373]                                     | -1.2458426 |
| STOML2     | stomatin like 2 [Source:HGNC Symbol;Acc:HGNC:14559]                                                | -1.0513841 |
| STOML3     | stomatin like 3 [Source:HGNC Symbol;Acc:HGNC:19420]                                                | 1.1237805  |
| STRADA     | STE20-related kinase adaptor alpha [Source:HGNC Symbol;Acc:HGNC:30172]                             | 1.1524712  |
| STRC       | stereocilin [Source:HGNC Symbol;Acc:HGNC:16035]                                                    | -1.2619677 |
| STRN3      | striatin 3 [Source:HGNC Symbol;Acc:HGNC:15720]                                                     | 1.22326    |
| STX11      | syntaxin 11 [Source:HGNC Symbol;Acc:HGNC:11429]                                                    | -1.7400285 |
| STX16      | syntaxin 16 [Source:HGNC Symbol;Acc:HGNC:11431]                                                    | 1.1989602  |
| STX18      | syntaxin 18 [Source:HGNC Symbol;Acc:HGNC:15942]                                                    | -1.0655811 |
| STX1A      | syntaxin 1A [Source:HGNC Symbol;Acc:HGNC:11433]                                                    | 1.4042501  |
| STX3       | syntaxin 3 [Source:HGNC Symbol;Acc:HGNC:11438]                                                     | 1.4778314  |
| STX4       | syntaxin 4 [Source:HGNC Symbol;Acc:HGNC:11439]                                                     | -1.216301  |
| STX6       | syntaxin 6 [Source:HGNC Symbol;Acc:HGNC:11441]                                                     | -1.3965899 |

|          |                                                                                                    |              |
|----------|----------------------------------------------------------------------------------------------------|--------------|
| STXBP5   | syntaxin binding protein 5 [Source:HGNC Symbol;Acc:HGNC:19665]                                     | 1.1357594    |
| STXBP6   | syntaxin binding protein 6 [Source:HGNC Symbol;Acc:HGNC:19666]                                     | 1.1285287    |
| STYK1    | serine/threonine/tyrosine kinase 1 [Source:HGNC Symbol;Acc:HGNC:18889]                             | 1.5221668    |
| SUCNR1   | succinate receptor 1 [Source:HGNC Symbol;Acc:HGNC:4542]                                            | 1.1384605    |
| SUFU     | SUFU negative regulator of hedgehog signaling [Source:HGNC Symbol;Acc:HGNC:16466]                  | -1.0691607   |
| SULT1A4  | sulfotransferase family 1A member 4 [Source:HGNC Symbol;Acc:HGNC:30004]                            | -1.30498895  |
| SULT1B1  | sulfotransferase family 1B member 1 [Source:HGNC Symbol;Acc:HGNC:17845]                            | 1.222456     |
| SULT1C3  | sulfotransferase family 1C member 3 [Source:HGNC Symbol;Acc:HGNC:33543]                            | 1.0664893    |
| SULT1E1  | sulfotransferase family 1E member 1 [Source:HGNC Symbol;Acc:HGNC:11377]                            | 1.1907842    |
| SULT2A1  | sulfotransferase family 2A member 1 [Source:HGNC Symbol;Acc:HGNC:11458]                            | -1.1195066   |
| SUMO1    | small ubiquitin-like modifier 1 [Source:HGNC Symbol;Acc:HGNC:12502]                                | 1.1942035    |
| SUMO1P3  | SUMO1 pseudogene 3 [Source:HGNC Symbol;Acc:HGNC:33150]                                             | 1.2398506    |
| SUMO3    | small ubiquitin-like modifier 3 [Source:HGNC Symbol;Acc:HGNC:11124]                                | -1.1117625   |
| SUN1     | Sad1 and UNC84 domain containing 1 [Source:HGNC Symbol;Acc:HGNC:18587]                             | -1.1049213   |
| SUPT3H   | SPT3 homolog, SAGA and STAGA complex component [Source:HGNC Symbol;Acc:HGNC:11466]                 | -1.092337    |
| SUSD5    | sushi domain containing 5 [Source:HGNC Symbol;Acc:HGNC:29061]                                      | -1.245893    |
| SUV39H1  | suppressor of variegation 3-9 homolog 1 [Source:HGNC Symbol;Acc:HGNC:11479]                        | 1.372106     |
| SUV39H2  | suppressor of variegation 3-9 homolog 2 [Source:HGNC Symbol;Acc:HGNC:17287]                        | 1.412716     |
| SUV420H1 | lysine methyltransferase 5B                                                                        | 1.1434336    |
| SUV420H2 | lysine methyltransferase 5C                                                                        | 1.3840066    |
| SVIL     | supervillin [Source:HGNC Symbol;Acc:HGNC:11480]                                                    | -1.3011549   |
| SVIP     | small VCP interacting protein [Source:HGNC Symbol;Acc:HGNC:25238]                                  | 1.1497164    |
| SVOP     | SV2 related protein [Source:HGNC Symbol;Acc:HGNC:25417]                                            | 1.07458      |
| SVOPL    | SVOP like [Source:HGNC Symbol;Acc:HGNC:27034]                                                      | 1.1703988    |
| SYAP1    | synapse associated protein 1 [Source:HGNC Symbol;Acc:HGNC:16273]                                   | 1.1688595    |
| SYBU     | syntabulin [Source:HGNC Symbol;Acc:HGNC:26011]                                                     | 1.1641141    |
| SYN2     | synapsin II [Source:HGNC Symbol;Acc:HGNC:11495]                                                    | -1.1460617   |
| SYNDI1   | synapse differentiation inducing 1 [Source:HGNC Symbol;Acc:HGNC:15885]                             | 1.1307203    |
| SYNE1    | spectrin repeat containing nuclear envelope protein 1 [Source:HGNC Symbol;Acc:HGNC:17089]          | 1.2101638    |
| SYNGR3   | synaptogyrin 3 [Source:HGNC Symbol;Acc:HGNC:11501]                                                 | -1.33068305  |
| SYNJ2    | synaptotagmin 2 [Source:HGNC Symbol;Acc:HGNC:11504]                                                | -1.2392128   |
| SYNPO    | synaptopodin [Source:HGNC Symbol;Acc:HGNC:30672]                                                   | -1.3194586   |
| SYNRG    | synerglin, gamma [Source:HGNC Symbol;Acc:HGNC:557]                                                 | -1.1342684   |
| SYS1     | Sys1 golgi trafficking protein [Source:HGNC Symbol;Acc:HGNC:16162]                                 | -1.17128965  |
| SYT11    | synaptotagmin 11 [Source:HGNC Symbol;Acc:HGNC:19239]                                               | -1.2013193   |
| SYT12    | synaptotagmin 12 [Source:HGNC Symbol;Acc:HGNC:18381]                                               | 1.0516901    |
| SYT14    | synaptotagmin 14 [Source:HGNC Symbol;Acc:HGNC:23143]                                               | -1.1756594   |
| SYT2     | synaptotagmin 2 [Source:HGNC Symbol;Acc:HGNC:11510]                                                | -1.11471305  |
| SYT6     | synaptotagmin 6 [Source:HGNC Symbol;Acc:HGNC:18638]                                                | -1.0813587   |
| SYTL2    | synaptotagmin like 2 [Source:HGNC Symbol;Acc:HGNC:15585]                                           | 1.0857561    |
| SYVN1    | synoviolin 1 [Source:HGNC Symbol;Acc:HGNC:20738]                                                   | 1.1483997    |
| SZT2     | seizure threshold 2 homolog (mouse) [Source:HGNC Symbol;Acc:HGNC:29040]                            | -1.1587      |
| TAAR1    | trace amine associated receptor 1 [Source:HGNC Symbol;Acc:HGNC:17734]                              | 1.1227604    |
| TAAR8    | trace amine associated receptor 8 [Source:HGNC Symbol;Acc:HGNC:14964]                              | -1.1320313   |
| TAB2     | TGF-beta activated kinase 1/MAP3K7 binding protein 2 [Source:HGNC Symbol;Acc:HGNC:17075]           | -1.38926615  |
| TAC1     | tachykinin precursor 1 [Source:HGNC Symbol;Acc:HGNC:11517]                                         | 1.1266389    |
| TACR1    | tachykinin receptor 1 [Source:HGNC Symbol;Acc:HGNC:11526]                                          | -1.0792997   |
| TACS2D2  | tumor-associated calcium signal transducer 2 [Source:HGNC Symbol;Acc:HGNC:11530]                   | 1.2108705    |
| TAF12    | TATA-box binding protein associated factor 12 [Source:HGNC Symbol;Acc:HGNC:11545]                  | 1.1606117    |
| TAF1A    | -box binding protein associated factor, RNA polymerase I subunit A [Source:HGNC Symbol;Acc:HGNC:1: | 1.0814369    |
| TAF1B    | -box binding protein associated factor, RNA polymerase I subunit B [Source:HGNC Symbol;Acc:HGNC:1: | 1.2733359    |
| TAF1C    | -box binding protein associated factor, RNA polymerase I subunit C [Source:HGNC Symbol;Acc:HGNC:1: | -1.2037797   |
| TAF5     | TATA-box binding protein associated factor 5 [Source:HGNC Symbol;Acc:HGNC:11539]                   | 1.2037756    |
| TAF9B    | TATA-box binding protein associated factor 9b [Source:HGNC Symbol;Acc:HGNC:17306]                  | 1.2268778    |
| TAL2     | TAL bHLH transcription factor 2 [Source:HGNC Symbol;Acc:HGNC:11557]                                | -1.1466997   |
| TANK     | TRAF family member associated NFKB activator [Source:HGNC Symbol;Acc:HGNC:11562]                   | -1.2746692   |
| TAP1     | transporter 1, ATP binding cassette subfamily B member [Source:HGNC Symbol;Acc:HGNC:43]            | -5.840709    |
| TAP2     | transporter 2, ATP binding cassette subfamily B member [Source:HGNC Symbol;Acc:HGNC:44]            | -1.3878918   |
| TAPBP    | TAP binding protein (tapasin) [Source:HGNC Symbol;Acc:HGNC:11566]                                  | -1.659206425 |
| TAPBP1   | TAP binding protein like [Source:HGNC Symbol;Acc:HGNC:30683]                                       | -1.2435796   |
| TAPT1    | transmembrane anterior posterior transformation 1 [Source:HGNC Symbol;Acc:HGNC:26887]              | 1.2648808    |
| TARBP1   | TAR (HIV-1) RNA binding protein 1 [Source:HGNC Symbol;Acc:HGNC:11568]                              | 1.1722906    |
| TAS2R1   | taste 2 receptor member 1 [Source:HGNC Symbol;Acc:HGNC:14909]                                      | 1.1054171    |
| TAS2R38  | taste 2 receptor member 38 [Source:HGNC Symbol;Acc:HGNC:9584]                                      | 1.0671       |
| TAS2R42  | taste 2 receptor member 42 [Source:HGNC Symbol;Acc:HGNC:18888]                                     | 1.1000696    |
| TAS2R8   | taste 2 receptor member 8 [Source:HGNC Symbol;Acc:HGNC:14915]                                      | -1.1002846   |
| TAT      | tyrosine aminotransferase [Source:HGNC Symbol;Acc:HGNC:11573]                                      | 1.4149128    |
| TATDN2   | TatD DNase domain containing 2 [Source:HGNC Symbol;Acc:HGNC:28988]                                 | -1.2221595   |
| TBC1D1   | TBC1 domain family member 1 [Source:HGNC Symbol;Acc:HGNC:11578]                                    | -1.16956065  |
| TBC1D10A | TBC1 domain family member 10A [Source:HGNC Symbol;Acc:HGNC:23609]                                  | -1.6626483   |
| TBC1D10B | TBC1 domain family member 10B [Source:HGNC Symbol;Acc:HGNC:24510]                                  | 1.4120173    |
| TBC1D10C | TBC1 domain family member 10C [Source:HGNC Symbol;Acc:HGNC:24702]                                  | 1.0942843    |
| TBC1D20  | TBC1 domain family member 20 [Source:HGNC Symbol;Acc:HGNC:16133]                                   | -1.1258305   |
| TBC1D22A | TBC1 domain family member 22A [Source:HGNC Symbol;Acc:HGNC:1309]                                   | -1.2354038   |
| TBC1D22B | TBC1 domain family member 22B [Source:HGNC Symbol;Acc:HGNC:21602]                                  | -1.6846085   |
| TBC1D24  | TBC1 domain family member 24 [Source:HGNC Symbol;Acc:HGNC:29203]                                   | -1.1942153   |
| TBC1D25  | TBC1 domain family member 25 [Source:HGNC Symbol;Acc:HGNC:8092]                                    | -1.1994458   |
| TBC1D27  | TBC1 domain family member 27 [Source:HGNC Symbol;Acc:HGNC:28104]                                   | 1.0916164    |
| TBC1D8   | TBC1 domain family member 8 [Source:HGNC Symbol;Acc:HGNC:17791]                                    | 1.7108886    |
| TBCD     | tubulin folding cofactor D [Source:HGNC Symbol;Acc:HGNC:11581]                                     | -1.2003107   |
| TBCEL    | tubulin folding cofactor E like [Source:HGNC Symbol;Acc:HGNC:28115]                                | 1.2188548    |
| TBL1X    | transducin beta like 1X-linked [Source:HGNC Symbol;Acc:HGNC:11585]                                 | -1.205578    |
| TBL1Y    | transducin beta like 1, Y-linked [Source:HGNC Symbol;Acc:HGNC:18502]                               | -1.3603249   |
| TBL2     | transducin beta like 2 [Source:HGNC Symbol;Acc:HGNC:11586]                                         | 1.2404001    |
| TBP      | TATA-box binding protein [Source:HGNC Symbol;Acc:HGNC:11588]                                       | 1.1188513    |
| TBRG1    | transforming growth factor beta regulator 1 [Source:HGNC Symbol;Acc:HGNC:29551]                    | -1.1646354   |

|          |                                                                                                   |             |
|----------|---------------------------------------------------------------------------------------------------|-------------|
| TBX1     | T-box 1 [Source:HGNC Symbol;Acc:HGNC:11592]                                                       | 1.72025485  |
| TBX19    | T-box 19 [Source:HGNC Symbol;Acc:HGNC:11596]                                                      | -1.3837837  |
| TBX20    | T-box 20 [Source:HGNC Symbol;Acc:HGNC:11598]                                                      | 1.1061829   |
| TBX22    | T-box 22 [Source:HGNC Symbol;Acc:HGNC:11600]                                                      | 1.143525    |
| TBXA2R   | thromboxane A2 receptor [Source:HGNC Symbol;Acc:HGNC:11608]                                       | -1.3096033  |
| TCEA1    | transcription elongation factor A1 [Source:HGNC Symbol;Acc:HGNC:11612]                            | 1.2140621   |
| TCEA2    | transcription elongation factor A2 [Source:HGNC Symbol;Acc:HGNC:11614]                            | 1.2129707   |
| TCEAL5   | transcription elongation factor A like 5 [Source:HGNC Symbol;Acc:HGNC:22282]                      | -1.1620266  |
| TCEAL8   | transcription elongation factor A like 8 [Source:HGNC Symbol;Acc:HGNC:28683]                      | 1.2279946   |
| TCF15    | transcription factor 15 (basic helix-loop-helix) [Source:HGNC Symbol;Acc:HGNC:11627]              | -2.0575776  |
| TCF21    | transcription factor 21 [Source:HGNC Symbol;Acc:HGNC:11632]                                       | 1.0974195   |
| TCF25    | transcription factor 25 [Source:HGNC Symbol;Acc:HGNC:29181]                                       | -1.1429046  |
| TCF7     | transcription factor 7 (T-cell specific, HMG-box) [Source:HGNC Symbol;Acc:HGNC:11639]             | -1.544704   |
| TCF7L1   | transcription factor 7 like 1 [Source:HGNC Symbol;Acc:HGNC:11640]                                 | -1.552054   |
| TCF7L2   | transcription factor 7 like 2 [Source:HGNC Symbol;Acc:HGNC:11641]                                 | -1.1125649  |
| TCL1A    | T-cell leukemia/lymphoma 1A [Source:HGNC Symbol;Acc:HGNC:11648]                                   | -1.0657189  |
| TCL6     | T-cell leukemia/lymphoma 6 (non-protein coding) [Source:HGNC Symbol;Acc:HGNC:13463]               | 1.1174482   |
| TCOF1    | treacle ribosome biogenesis factor 1 [Source:HGNC Symbol;Acc:HGNC:11654]                          | 1.1835889   |
| TCP1111  | t-complex 11 like 1 [Source:HGNC Symbol;Acc:HGNC:25655]                                           | -1.3249453  |
| TCTE1    | t-complex-associated-testis-expressed 1 [Source:HGNC Symbol;Acc:HGNC:11693]                       | -1.1561464  |
| TCTEX1D4 | Tctex1 domain containing 4 [Source:HGNC Symbol;Acc:HGNC:32315]                                    | -1.1280748  |
| TCTN2    | tectonic family member 2 [Source:HGNC Symbol;Acc:HGNC:25774]                                      | -1.1062703  |
| TDG      | thymine DNA glycosylase [Source:HGNC Symbol;Acc:HGNC:11700]                                       | 1.3547912   |
| TDP2     | tyrosyl-DNA phosphodiesterase 2 [Source:HGNC Symbol;Acc:HGNC:17768]                               | 1.3462905   |
| TDRD1    | tudor domain containing 1 [Source:HGNC Symbol;Acc:HGNC:11712]                                     | -1.1629562  |
| TDRD5    | tudor domain containing 5 [Source:HGNC Symbol;Acc:HGNC:20614]                                     | 1.1321472   |
| TDRD7    | tudor domain containing 7 [Source:HGNC Symbol;Acc:HGNC:30831]                                     | -1.2014122  |
| TECPR1   | tectonin beta-propeller repeat containing 1 [Source:HGNC Symbol;Acc:HGNC:22214]                   | -1.0677514  |
| TECPR2   | tectonin beta-propeller repeat containing 2 [Source:HGNC Symbol;Acc:HGNC:19957]                   | -1.1434623  |
| TECTA    | tectorin alpha [Source:HGNC Symbol;Acc:HGNC:11720]                                                | -1.0953746  |
| TEF      | TEF, PAR bZIP transcription factor [Source:HGNC Symbol;Acc:HGNC:11722]                            | -1.2507441  |
| TEKT3    | tektin 3 [Source:HGNC Symbol;Acc:HGNC:14293]                                                      | -1.0586303  |
| TENC1    | tensin 2                                                                                          | 1.7355207   |
| TEPP     | testis, prostate and placenta expressed [Source:HGNC Symbol;Acc:HGNC:33745]                       | -1.294156   |
| TES      | testin LIM domain protein [Source:HGNC Symbol;Acc:HGNC:14620]                                     | -1.242406   |
| TESC     | tescalcin [Source:HGNC Symbol;Acc:HGNC:26065]                                                     | -1.229247   |
| TEt3     | tet methylcytosine dioxygenase 3 [Source:HGNC Symbol;Acc:HGNC:28313]                              | 1.0833104   |
| TEX12    | testis expressed 12 [Source:HGNC Symbol;Acc:HGNC:11734]                                           | 1.0969146   |
| TEX15    | testis expressed 15 [Source:HGNC Symbol;Acc:HGNC:11738]                                           | 1.0760782   |
| TEX9     | testis expressed 9 [Source:HGNC Symbol;Acc:HGNC:29585]                                            | 1.1261269   |
| TFB1M    | transcription factor B1, mitochondrial [Source:HGNC Symbol;Acc:HGNC:17037]                        | -1.1552731  |
| TFE3     | transcription factor binding to IGHM enhancer 3 [Source:HGNC Symbol;Acc:HGNC:11752]               | -1.3735228  |
| TFEB     | transcription factor EB [Source:HGNC Symbol;Acc:HGNC:11753]                                       | -1.215368   |
| TFE2     | trefoil factor 2 [Source:HGNC Symbol;Acc:HGNC:11756]                                              | -1.1593903  |
| TFG      | TRK-fused gene [Source:HGNC Symbol;Acc:HGNC:11758]                                                | -1.2120285  |
| TFIP11   | tuftelin interacting protein 11 [Source:HGNC Symbol;Acc:HGNC:17165]                               | -1.1499203  |
| TFPI2    | tissue factor pathway inhibitor 2 [Source:HGNC Symbol;Acc:HGNC:11761]                             | -1.2973212  |
| TFRC     | transferrin receptor [Source:HGNC Symbol;Acc:HGNC:11763]                                          | 1.3148665   |
| TGFA     | transforming growth factor alpha [Source:HGNC Symbol;Acc:HGNC:11765]                              | -1.2942945  |
| TGFB1    | transforming growth factor beta 1 [Source:HGNC Symbol;Acc:HGNC:11766]                             | 1.2400473   |
| TGFB2    | transforming growth factor beta receptor 2 [Source:HGNC Symbol;Acc:HGNC:11773]                    | -1.6929325  |
| TGIF2LY  | TGF beta induced factor homeobox 2 like, Y-linked [Source:HGNC Symbol;Acc:HGNC:18569]             | -1.0957899  |
| TGS1     | trimethylguanosine synthase 1 [Source:HGNC Symbol;Acc:HGNC:17843]                                 | 1.644198    |
| THAP1    | THAP domain containing 1 [Source:HGNC Symbol;Acc:HGNC:20856]                                      | 1.2663431   |
| THAP5    | THAP domain containing 5 [Source:HGNC Symbol;Acc:HGNC:23188]                                      | 1.1731004   |
| THAP8    | THAP domain containing 8 [Source:HGNC Symbol;Acc:HGNC:23191]                                      | 1.1259615   |
| THBD     | thrombomodulin [Source:HGNC Symbol;Acc:HGNC:11784]                                                | 2.5723958   |
| THEM4    | thioesterase superfamily member 4 [Source:HGNC Symbol;Acc:HGNC:17947]                             | -1.0741367  |
| THOC3    | THO complex 3 [Source:HGNC Symbol;Acc:HGNC:19072]                                                 | 1.1531777   |
| THOC7    | THO complex 7 [Source:HGNC Symbol;Acc:HGNC:29874]                                                 | 1.2816858   |
| THSD1    | thrombospondin type 1 domain containing 1 [Source:HGNC Symbol;Acc:HGNC:17754]                     | 1.1414342   |
| THUMPD3  | THUMP domain containing 3 [Source:HGNC Symbol;Acc:HGNC:24493]                                     | 1.2828622   |
| THY1     | Thy-1 cell surface antigen [Source:HGNC Symbol;Acc:HGNC:11801]                                    | -1.495947   |
| TICAM1   | toll like receptor adaptor molecule 1 [Source:HGNC Symbol;Acc:HGNC:18348]                         | -1.68680635 |
| TIE1     | rosine kinase with immunoglobulin like and EGF like domains 1 [Source:HGNC Symbol;Acc:HGNC:11801] | 1.2269287   |
| TIFA     | TRAF interacting protein with forkhead associated domain [Source:HGNC Symbol;Acc:HGNC:19075]      | -1.3406183  |
| TIGD2    | tigger transposable element derived 2 [Source:HGNC Symbol;Acc:HGNC:18333]                         | 1.2720616   |
| TIGD4    | tigger transposable element derived 4 [Source:HGNC Symbol;Acc:HGNC:18335]                         | 1.0937688   |
| TIMM17B  | nslocase of inner mitochondrial membrane 17 homolog B (yeast) [Source:HGNC Symbol;Acc:HGNC:173]   | -1.3398985  |
| TIMM23   | translocase of inner mitochondrial membrane 23 [Source:HGNC Symbol;Acc:HGNC:17312]                | -1.1232618  |
| TIMM8A   | nslocase of inner mitochondrial membrane 8 homolog A (yeast) [Source:HGNC Symbol;Acc:HGNC:1181]   | 1.1209888   |
| TIMM8B   | translocase of inner mitochondrial membrane 8 homolog B [Source:HGNC Symbol;Acc:HGNC:11818]       | -1.1581358  |
| TIMM9    | translocase of inner mitochondrial membrane 9 [Source:HGNC Symbol;Acc:HGNC:11819]                 | 1.2661512   |
| TIMP3    | TIMP metalloproteinase inhibitor 3 [Source:HGNC Symbol;Acc:HGNC:11822]                            | -1.5256875  |
| TINF2    | TERF1 interacting nuclear factor 2 [Source:HGNC Symbol;Acc:HGNC:11824]                            | -1.1987168  |
| TIPARP   | TCDD inducible poly(ADP-ribose) polymerase [Source:HGNC Symbol;Acc:HGNC:23696]                    | 1.3308982   |
| TJAP1    | tight junction associated protein 1 [Source:HGNC Symbol;Acc:HGNC:17949]                           | -1.3311831  |
| TKTL1    | transketolase like 1 [Source:HGNC Symbol;Acc:HGNC:11835]                                          | -1.1161263  |
| TKTL2    | transketolase like 2 [Source:HGNC Symbol;Acc:HGNC:25313]                                          | 1.1063786   |
| TLE3     | transducin like enhancer of split 3 [Source:HGNC Symbol;Acc:HGNC:11839]                           | -1.2865205  |
| TLE4     | transducin like enhancer of split 4 [Source:HGNC Symbol;Acc:HGNC:11840]                           | -1.21103525 |
| TLN1     | talin 1 [Source:HGNC Symbol;Acc:HGNC:11845]                                                       | 1.2138771   |
| TLR2     | toll like receptor 2 [Source:HGNC Symbol;Acc:HGNC:11848]                                          | -1.508518   |
| TLR4     | toll like receptor 4 [Source:HGNC Symbol;Acc:HGNC:11850]                                          | 1.7092305   |
| TM4SF19  | transmembrane 4 L six family member 19 [Source:HGNC Symbol;Acc:HGNC:25167]                        | -1.1430283  |
| TM4SF20  | transmembrane 4 L six family member 20 [Source:HGNC Symbol;Acc:HGNC:26230]                        | 1.0508955   |

|              |                                                                                                        |            |
|--------------|--------------------------------------------------------------------------------------------------------|------------|
| TM4SF5       | transmembrane 4 L six family member 5 [Source:HGNC Symbol;Acc:HGNC:11857]                              | -1.131919  |
| TM9SF4       | transmembrane 9 superfamily member 4 [Source:HGNC Symbol;Acc:HGNC:30797]                               | 1.1924593  |
| TMC7         | transmembrane channel like 7 [Source:HGNC Symbol;Acc:HGNC:23000]                                       | 1.2306852  |
| TMCC2        | transmembrane and coiled-coil domain family 2 [Source:HGNC Symbol;Acc:HGNC:24239]                      | -2.2500358 |
| TMCC3        | transmembrane and coiled-coil domain family 3 [Source:HGNC Symbol;Acc:HGNC:29199]                      | 1.3422843  |
| TMCO2        | transmembrane and coiled-coil domains 2 [Source:HGNC Symbol;Acc:HGNC:23312]                            | -1.2528173 |
| TMCO5A       | transmembrane and coiled-coil domains 5A [Source:HGNC Symbol;Acc:HGNC:28558]                           | -1.1507288 |
| TMED10       | transmembrane p24 trafficking protein 10 [Source:HGNC Symbol;Acc:HGNC:16998]                           | 1.3314298  |
| TMED5        | transmembrane p24 trafficking protein 5 [Source:HGNC Symbol;Acc:HGNC:24251]                            | 1.5333451  |
| TMED7-TICAM2 | TMED7-TICAM2 readthrough [Source:HGNC Symbol;Acc:HGNC:33945]                                           | -1.3315955 |
| TMEFF2       | transmembrane protein with EGF like and two follistatin like domains 2 [Source:HGNC Symbol;Acc:HGNC:11 | 1.0801088  |
| TMEM100      | transmembrane protein 100 [Source:HGNC Symbol;Acc:HGNC:25607]                                          | 1.1063317  |
| TMEM106A     | transmembrane protein 106A [Source:HGNC Symbol;Acc:HGNC:28288]                                         | -1.2923992 |
| TMEM106B     | transmembrane protein 106B [Source:HGNC Symbol;Acc:HGNC:22407]                                         | 1.2412679  |
| TMEM106C     | transmembrane protein 106C [Source:HGNC Symbol;Acc:HGNC:28775]                                         | 1.2137396  |
| TMEM11       | transmembrane protein 11 [Source:HGNC Symbol;Acc:HGNC:16823]                                           | 1.1345352  |
| TMEM111      | ER membrane protein complex subunit 3                                                                  | -1.1016078 |
| TMEM120A     | transmembrane protein 120A [Source:HGNC Symbol;Acc:HGNC:21697]                                         | -1.3857841 |
| TMEM121      | transmembrane protein 121 [Source:HGNC Symbol;Acc:HGNC:20511]                                          | 1.663474   |
| TMEM126B     | transmembrane protein 126B [Source:HGNC Symbol;Acc:HGNC:30883]                                         | 1.186125   |
| TMEM135      | transmembrane protein 135 [Source:HGNC Symbol;Acc:HGNC:26167]                                          | 1.2945952  |
| TMEM14A      | transmembrane protein 14A [Source:HGNC Symbol;Acc:HGNC:21076]                                          | 1.132862   |
| TMEM14B      | transmembrane protein 14B [Source:HGNC Symbol;Acc:HGNC:21384]                                          | -1.1426967 |
| TMEM14C      | transmembrane protein 14C [Source:HGNC Symbol;Acc:HGNC:20952]                                          | -1.1689383 |
| TMEM156      | transmembrane protein 156 [Source:HGNC Symbol;Acc:HGNC:26260]                                          | 1.1164584  |
| TMEM158      | transmembrane protein 158 (gene/pseudogene) [Source:HGNC Symbol;Acc:HGNC:30293]                        | -1.2943968 |
| TMEM167A     | transmembrane protein 167A [Source:HGNC Symbol;Acc:HGNC:28330]                                         | -1.1429507 |
| TMEM167B     | transmembrane protein 167B [Source:HGNC Symbol;Acc:HGNC:30187]                                         | -1.4892629 |
| TMEM169      | transmembrane protein 169 [Source:HGNC Symbol;Acc:HGNC:25130]                                          | 1.0994143  |
| TMEM171      | transmembrane protein 171 [Source:HGNC Symbol;Acc:HGNC:27031]                                          | -1.4058913 |
| TMEM173      | transmembrane protein 173 [Source:HGNC Symbol;Acc:HGNC:27962]                                          | -1.2409935 |
| TMEM177      | transmembrane protein 177 [Source:HGNC Symbol;Acc:HGNC:28143]                                          | 1.3067323  |
| TMEM185A     | transmembrane protein 185A [Source:HGNC Symbol;Acc:HGNC:17125]                                         | -1.3029523 |
| TMEM185B     | transmembrane protein 185B [Source:HGNC Symbol;Acc:HGNC:18896]                                         | -1.1686187 |
| TMEM189      | transmembrane protein 189 [Source:HGNC Symbol;Acc:HGNC:16735]                                          | 1.2265846  |
| TMEM191C     | transmembrane protein 191C [Source:HGNC Symbol;Acc:HGNC:33601]                                         | -1.099501  |
| TMEM200B     | transmembrane protein 200B [Source:HGNC Symbol;Acc:HGNC:33785]                                         | -1.0794677 |
| TMEM207      | transmembrane protein 207 [Source:HGNC Symbol;Acc:HGNC:33705]                                          | 1.1245984  |
| TMEM215      | transmembrane protein 215 [Source:HGNC Symbol;Acc:HGNC:33816]                                          | 1.1655358  |
| TMEM217      | transmembrane protein 217 [Source:HGNC Symbol;Acc:HGNC:21238]                                          | -4.6164846 |
| TMEM22       | solute carrier family 35 member G2                                                                     | -1.3441243 |
| TMEM223      | transmembrane protein 223 [Source:HGNC Symbol;Acc:HGNC:28464]                                          | 1.2169384  |
| TMEM225      | transmembrane protein 225 [Source:HGNC Symbol;Acc:HGNC:32390]                                          | 1.1413114  |
| TMEM229B     | transmembrane protein 229B [Source:HGNC Symbol;Acc:HGNC:20130]                                         | -1.1118013 |
| TMEM237      | transmembrane protein 237 [Source:HGNC Symbol;Acc:HGNC:14432]                                          | 1.1738029  |
| TMEM25       | transmembrane protein 25 [Source:HGNC Symbol;Acc:HGNC:25890]                                           | 1.2146704  |
| TMEM35       | transmembrane protein 35A                                                                              | 1.2645749  |
| TMEM38B      | transmembrane protein 38B [Source:HGNC Symbol;Acc:HGNC:25535]                                          | -1.2232078 |
| TMEM39B      | transmembrane protein 39B [Source:HGNC Symbol;Acc:HGNC:25510]                                          | 1.2717906  |
| TMEM40       | transmembrane protein 40 [Source:HGNC Symbol;Acc:HGNC:25620]                                           | -1.3055817 |
| TMEM41A      | transmembrane protein 41A [Source:HGNC Symbol;Acc:HGNC:30544]                                          | -1.1097478 |
| TMEM43       | transmembrane protein 43 [Source:HGNC Symbol;Acc:HGNC:28472]                                           | -1.1273928 |
| TMEM44       | transmembrane protein 44 [Source:HGNC Symbol;Acc:HGNC:25120]                                           | -1.2716272 |
| TMEM50B      | transmembrane protein 50B [Source:HGNC Symbol;Acc:HGNC:1280]                                           | 1.2522484  |
| TMEM55A      | transmembrane protein 55A [Source:HGNC Symbol;Acc:HGNC:25452]                                          | 1.4456233  |
| TMEM61       | transmembrane protein 61 [Source:HGNC Symbol;Acc:HGNC:27296]                                           | -1.0690391 |
| TMEM64       | transmembrane protein 64 [Source:HGNC Symbol;Acc:HGNC:25441]                                           | 1.2531525  |
| TMEM65       | transmembrane protein 65 [Source:HGNC Symbol;Acc:HGNC:25203]                                           | 1.3447341  |
| TMEM67       | transmembrane protein 67 [Source:HGNC Symbol;Acc:HGNC:28396]                                           | 1.1461643  |
| TMEM68       | transmembrane protein 68 [Source:HGNC Symbol;Acc:HGNC:26510]                                           | 1.2308097  |
| TMEM69       | transmembrane protein 69 [Source:HGNC Symbol;Acc:HGNC:28035]                                           | -1.1867077 |
| TMEM71       | transmembrane protein 71 [Source:HGNC Symbol;Acc:HGNC:26572]                                           | -1.3289893 |
| TMEM86A      | transmembrane protein 86A [Source:HGNC Symbol;Acc:HGNC:26890]                                          | 1.0948877  |
| TMEM8C       | transmembrane protein 8C [Source:HGNC Symbol;Acc:HGNC:33778]                                           | -1.2153137 |
| TMEM93       | ER membrane protein complex subunit 6                                                                  | 1.1098008  |
| TMIE         | transmembrane inner ear [Source:HGNC Symbol;Acc:HGNC:30800]                                            | -1.5493641 |
| TMIGD1       | transmembrane and immunoglobulin domain containing 1 [Source:HGNC Symbol;Acc:HGNC:32431]               | 1.0664574  |
| TMOD1        | tropomodulin 1 [Source:HGNC Symbol;Acc:HGNC:11871]                                                     | -1.2055215 |
| TMPPPE       | transmembrane protein with metallophosphoesterase domain [Source:HGNC Symbol;Acc:HGNC:33865]           | -1.2083989 |
| TMPPRSS11E   | transmembrane protease, serine 11E [Source:HGNC Symbol;Acc:HGNC:24465]                                 | 1.0765096  |
| TMPPRSS11F   | transmembrane protease, serine 11F [Source:HGNC Symbol;Acc:HGNC:29994]                                 | 1.0951322  |
| TMPPRSS12    | transmembrane protease, serine 12 [Source:HGNC Symbol;Acc:HGNC:28779]                                  | 1.1629393  |
| TMPPRSS15    | transmembrane protease, serine 15 [Source:HGNC Symbol;Acc:HGNC:9490]                                   | 1.0570371  |
| TMPPRSS2     | transmembrane protease, serine 2 [Source:HGNC Symbol;Acc:HGNC:11876]                                   | -1.1248425 |
| TMX3         | thioredoxin related transmembrane protein 3 [Source:HGNC Symbol;Acc:HGNC:24718]                        | 1.7814785  |
| TNAP         | alkaline phosphatase                                                                                   | -1.2356347 |
| TNC          | tenascin C [Source:HGNC Symbol;Acc:HGNC:5318]                                                          | -1.123085  |
| TNF          | tumor necrosis factor [Source:HGNC Symbol;Acc:HGNC:11892]                                              | -1.5600228 |
| TNFAIP1      | TNF alpha induced protein 1 [Source:HGNC Symbol;Acc:HGNC:11894]                                        | -3.285186  |
| TNFAIP3      | TNF alpha induced protein 3 [Source:HGNC Symbol;Acc:HGNC:11896]                                        | -10.461266 |
| TNFAIP8      | TNF alpha induced protein 8 [Source:HGNC Symbol;Acc:HGNC:17260]                                        | -1.6170085 |
| TNFRSF10B    | TNF receptor superfamily member 10b [Source:HGNC Symbol;Acc:HGNC:11905]                                | -2.246114  |
| TNFRSF11A    | TNF receptor superfamily member 11a [Source:HGNC Symbol;Acc:HGNC:11908]                                | -1.207558  |
| TNFRSF12A    | TNF receptor superfamily member 12A [Source:HGNC Symbol;Acc:HGNC:18152]                                | 1.4738115  |
| TNFRSF14     | TNF receptor superfamily member 14 [Source:HGNC Symbol;Acc:HGNC:11912]                                 | -1.350024  |
| TNFRSF25     | TNF receptor superfamily member 25 [Source:HGNC Symbol;Acc:HGNC:11910]                                 | 1.1280475  |

|              |                                                                                                              |             |
|--------------|--------------------------------------------------------------------------------------------------------------|-------------|
| TNFRSF4      | TNF receptor superfamily member 4 [Source:HGNC Symbol;Acc:HGNC:11918]                                        | -2.6552737  |
| TNFRSF6B     | TNF receptor superfamily member 6b [Source:HGNC Symbol;Acc:HGNC:11921]                                       | -1.38228975 |
| TNFRSF9      | TNF receptor superfamily member 9 [Source:HGNC Symbol;Acc:HGNC:11924]                                        | -3.1794212  |
| TNFSF10      | tumor necrosis factor superfamily member 10 [Source:HGNC Symbol;Acc:HGNC:11925]                              | -2.179855   |
| TNFSF12      | tumor necrosis factor superfamily member 12 [Source:HGNC Symbol;Acc:HGNC:11927]                              | 1.0728955   |
| TNFSF15      | tumor necrosis factor superfamily member 15 [Source:HGNC Symbol;Acc:HGNC:11931]                              | -1.6641451  |
| TNFSF18      | tumor necrosis factor superfamily member 18 [Source:HGNC Symbol;Acc:HGNC:11932]                              | -1.3544971  |
| TNFSF4       | tumor necrosis factor superfamily member 4 [Source:HGNC Symbol;Acc:HGNC:11934]                               | -1.2406721  |
| TNFSF9       | tumor necrosis factor superfamily member 9 [Source:HGNC Symbol;Acc:HGNC:11939]                               | -1.3042388  |
| TNIK         | TRAF2 and NCK interacting kinase [Source:HGNC Symbol;Acc:HGNC:30765]                                         | 1.2649497   |
| TNIP1        | TNFAIP3 interacting protein 1 [Source:HGNC Symbol;Acc:HGNC:16903]                                            | -4.809692   |
| TNIP2        | TNFAIP3 interacting protein 2 [Source:HGNC Symbol;Acc:HGNC:19118]                                            | -1.8379979  |
| TNKS1BP1     | tankyrase 1 binding protein 1 [Source:HGNC Symbol;Acc:HGNC:19081]                                            | -1.4680911  |
| TNNI3K       | TNNI3 interacting kinase [Source:HGNC Symbol;Acc:HGNC:19661]                                                 | 1.1072202   |
| TNPO2        | transportin 2 [Source:HGNC Symbol;Acc:HGNC:19998]                                                            | -1.2568765  |
| TNRC6C       | trinucleotide repeat containing 6C [Source:HGNC Symbol;Acc:HGNC:29318]                                       | -1.3360386  |
| TNS1         | tensin 1 [Source:HGNC Symbol;Acc:HGNC:11973]                                                                 | -1.1917463  |
| TNS3         | tensin 3 [Source:HGNC Symbol;Acc:HGNC:21616]                                                                 | -1.4141543  |
| TNXB         | tenascin XB [Source:HGNC Symbol;Acc:HGNC:11976]                                                              | 1.2142673   |
| TOB2         | transducer of ERBB2, 2 [Source:HGNC Symbol;Acc:HGNC:11980]                                                   | -1.301671   |
| TOB2P1       | transducer of ERBB2, 2 pseudogene 1 [Source:HGNC Symbol;Acc:HGNC:13986]                                      | -1.1989537  |
| TOMM20       | translocase of outer mitochondrial membrane 20 [Source:HGNC Symbol;Acc:HGNC:20947]                           | 1.2529776   |
| TOMM22       | translocase of outer mitochondrial membrane 22 [Source:HGNC Symbol;Acc:HGNC:18002]                           | 1.1044419   |
| TOMM34       | translocase of outer mitochondrial membrane 34 [Source:HGNC Symbol;Acc:HGNC:15746]                           | -1.1401911  |
| TOMM40       | translocase of outer mitochondrial membrane 40 [Source:HGNC Symbol;Acc:HGNC:18001]                           | 1.51621095  |
| TOMM6        | translocase of outer mitochondrial membrane 6 [Source:HGNC Symbol;Acc:HGNC:34528]                            | 1.1691308   |
| TOMM7        | translocase of outer mitochondrial membrane 7 [Source:HGNC Symbol;Acc:HGNC:21648]                            | 1.1434207   |
| TONSL        | tonsoku-like, DNA repair protein [Source:HGNC Symbol;Acc:HGNC:7801]                                          | 1.2066493   |
| TOP1P2       | topoisomerase (DNA) I pseudogene 2                                                                           | 1.4177773   |
| TOPBP1       | topoisomerase (DNA) II binding protein 1 [Source:HGNC Symbol;Acc:HGNC:17008]                                 | 1.4350045   |
| TOR1AIP1     | torsin 1A interacting protein 1 [Source:HGNC Symbol;Acc:HGNC:29456]                                          | 1.1124265   |
| TOR1AIP2     | torsin 1A interacting protein 2 [Source:HGNC Symbol;Acc:HGNC:24055]                                          | 1.0945134   |
| TOR1B        | torsin family 1 member B [Source:HGNC Symbol;Acc:HGNC:11995]                                                 | -1.2010314  |
| TOR3A        | torsin family 3 member A [Source:HGNC Symbol;Acc:HGNC:11997]                                                 | 1.2394414   |
| TOX2         | TOX high mobility group box family member 2 [Source:HGNC Symbol;Acc:HGNC:16095]                              | 1.3213398   |
| TP53         | tumor protein p53 [Source:HGNC Symbol;Acc:HGNC:11998]                                                        | -1.27585    |
| TP53BP2      | tumor protein p53 binding protein 2 [Source:HGNC Symbol;Acc:HGNC:12000]                                      | -1.2665701  |
| TP53INP1     | tumor protein p53 inducible nuclear protein 1 [Source:HGNC Symbol;Acc:HGNC:18022]                            | 1.2099884   |
| TP53INP2     | tumor protein p53 inducible nuclear protein 2 [Source:HGNC Symbol;Acc:HGNC:16104]                            | -1.1525676  |
| TP73-AS1     | TP73 antisense RNA 1 [Source:HGNC Symbol;Acc:HGNC:29052]                                                     | 1.1244515   |
| TPBG         | trophoblast glycoprotein [Source:HGNC Symbol;Acc:HGNC:12004]                                                 | -1.3818378  |
| TPD52        | tumor protein D52 [Source:HGNC Symbol;Acc:HGNC:12005]                                                        | 1.0762159   |
| TPH1         | tryptophan hydroxylase 1 [Source:HGNC Symbol;Acc:HGNC:12008]                                                 | 1.1287633   |
| TPH2         | tryptophan hydroxylase 2 [Source:HGNC Symbol;Acc:HGNC:20692]                                                 | 1.0575708   |
| TPH1P2       | triosephosphate isomerase 1 pseudogene 2 [Source:HGNC Symbol;Acc:HGNC:38069]                                 | -1.1306612  |
| TPM3         | tropomyosin 3 [Source:HGNC Symbol;Acc:HGNC:12012]                                                            | -1.2672457  |
| TPO          | thyroid peroxidase [Source:HGNC Symbol;Acc:HGNC:12015]                                                       | -1.1701678  |
| TPRG1        | tumor protein p63 regulated 1 [Source:HGNC Symbol;Acc:HGNC:24759]                                            | -1.056538   |
| TPRKB        | TP53RK binding protein [Source:HGNC Symbol;Acc:HGNC:24259]                                                   | 1.1895676   |
| TPSD1        | tryptase delta 1 [Source:HGNC Symbol;Acc:HGNC:14118]                                                         | 1.0654223   |
| TPST1        | tyrosylprotein sulfotransferase 1 [Source:HGNC Symbol;Acc:HGNC:12020]                                        | -1.2655418  |
| TPTE2P1      | thymine phosphoinositide 3-phosphatase and tensin homolog 2 pseudogene 1 [Source:HGNC Symbol;Acc:HGNC:12031] | 1.0764427   |
| TRAF1        | TNF receptor associated factor 1 [Source:HGNC Symbol;Acc:HGNC:12031]                                         | -14.809285  |
| TRAF2        | TNF receptor associated factor 2 [Source:HGNC Symbol;Acc:HGNC:12032]                                         | -1.43029035 |
| TRAF3        | TNF receptor associated factor 3 [Source:HGNC Symbol;Acc:HGNC:12033]                                         | -2.0109203  |
| TRAF3IP2-AS1 | TRAF3IP2 antisense RNA 1 [Source:HGNC Symbol;Acc:HGNC:40005]                                                 | -1.1228024  |
| TRAF6        | TNF receptor associated factor 6 [Source:HGNC Symbol;Acc:HGNC:12036]                                         | -1.3785845  |
| TRAF7        | TNF receptor associated factor 7 [Source:HGNC Symbol;Acc:HGNC:20456]                                         | 1.1727204   |
| TRAFD1       | TRAF-type zinc finger domain containing 1 [Source:HGNC Symbol;Acc:HGNC:24808]                                | -1.1418102  |
| TRAK1        | trafficking kinesin protein 1 [Source:HGNC Symbol;Acc:HGNC:29947]                                            | -1.163809   |
| TRAK2        | trafficking kinesin protein 2 [Source:HGNC Symbol;Acc:HGNC:13206]                                            | 1.3494784   |
| TRAM2        | translocation associated membrane protein 2 [Source:HGNC Symbol;Acc:HGNC:16855]                              | 1.5059513   |
| TRAPPC10     | trafficking protein particle complex 10 [Source:HGNC Symbol;Acc:HGNC:11868]                                  | -1.3068522  |
| TRAPP2P1     | trafficking protein particle complex 2B                                                                      | -1.1783549  |
| TRAPP6B      | trafficking protein particle complex 6B [Source:HGNC Symbol;Acc:HGNC:23066]                                  | 1.1573316   |
| TREM1        | triggering receptor expressed on myeloid cells 1 [Source:HGNC Symbol;Acc:HGNC:17760]                         | 1.2303058   |
| TRERF1       | transcriptional regulating factor 1 [Source:HGNC Symbol;Acc:HGNC:18273]                                      | 1.35269     |
| TRIB1        | tribbles pseudokinase 1 [Source:HGNC Symbol;Acc:HGNC:16891]                                                  | -2.284549   |
| TRIL         | TLR4 interactor with leucine rich repeats [Source:HGNC Symbol;Acc:HGNC:22200]                                | 1.5817469   |
| TRIM10       | tripartite motif containing 10 [Source:HGNC Symbol;Acc:HGNC:10072]                                           | -1.0960135  |
| TRIM11       | tripartite motif containing 11 [Source:HGNC Symbol;Acc:HGNC:16281]                                           | -1.2189177  |
| TRIM13       | tripartite motif containing 13 [Source:HGNC Symbol;Acc:HGNC:9976]                                            | 1.27498165  |
| TRIM14       | tripartite motif containing 14 [Source:HGNC Symbol;Acc:HGNC:16283]                                           | -1.2784243  |
| TRIM16L      | tripartite motif containing 16-like [Source:HGNC Symbol;Acc:HGNC:32670]                                      | -2.223522   |
| TRIM21       | tripartite motif containing 21 [Source:HGNC Symbol;Acc:HGNC:11312]                                           | -1.5831492  |
| TRIM25       | tripartite motif containing 25 [Source:HGNC Symbol;Acc:HGNC:12932]                                           | -1.4707078  |
| TRIM27       | tripartite motif containing 27 [Source:HGNC Symbol;Acc:HGNC:9975]                                            | -1.1455419  |
| TRIM32       | tripartite motif containing 32 [Source:HGNC Symbol;Acc:HGNC:16380]                                           | -1.142216   |
| TRIM35       | tripartite motif containing 35 [Source:HGNC Symbol;Acc:HGNC:16285]                                           | -1.3243946  |
| TRIM36       | tripartite motif containing 36 [Source:HGNC Symbol;Acc:HGNC:16280]                                           | 1.0607179   |
| TRIM39       | tripartite motif containing 39 [Source:HGNC Symbol;Acc:HGNC:10065]                                           | -1.1761115  |
| TRIM42       | tripartite motif containing 42 [Source:HGNC Symbol;Acc:HGNC:19014]                                           | -1.0968263  |
| TRIM45       | tripartite motif containing 45 [Source:HGNC Symbol;Acc:HGNC:19018]                                           | 1.335756    |
| TRIM47       | tripartite motif containing 47 [Source:HGNC Symbol;Acc:HGNC:19020]                                           | -2.7629037  |
| TRIM49       | tripartite motif containing 49 [Source:HGNC Symbol;Acc:HGNC:13431]                                           | -1.1847588  |
| TRIM56       | tripartite motif containing 56 [Source:HGNC Symbol;Acc:HGNC:19028]                                           | -1.7186335  |

|         |                                                                                                     |             |
|---------|-----------------------------------------------------------------------------------------------------|-------------|
| TRIM59  | tripartite motif containing 59 [Source:HGNC Symbol;Acc:HGNC:30834]                                  | 1.3179337   |
| TRIM6   | tripartite motif containing 6 [Source:HGNC Symbol;Acc:HGNC:16277]                                   | 1.2045777   |
| TRIM63  | tripartite motif containing 63 [Source:HGNC Symbol;Acc:HGNC:16007]                                  | 1.0726925   |
| TRIM66  | tripartite motif containing 66 [Source:HGNC Symbol;Acc:HGNC:29005]                                  | 1.1645573   |
| TRIO    | trio Rho guanine nucleotide exchange factor [Source:HGNC Symbol;Acc:HGNC:12303]                     | -1.3608733  |
| TRIOBP  | TRIO and F-actin binding protein [Source:HGNC Symbol;Acc:HGNC:17009]                                | -1.3349626  |
| TRIP10  | thyroid hormone receptor interactor 10 [Source:HGNC Symbol;Acc:HGNC:12304]                          | -1.4320321  |
| TRMT112 | tRNA methyltransferase 11-2 homolog (S. cerevisiae) [Source:HGNC Symbol;Acc:HGNC:26940]             | -1.1423287  |
| TRMT5   | tRNA methyltransferase 5 [Source:HGNC Symbol;Acc:HGNC:23141]                                        | 1.1948779   |
| TRNT1   | tRNA nucleotidyl transferase 1 [Source:HGNC Symbol;Acc:HGNC:17341]                                  | -1.0948597  |
| TRO     | trophinin [Source:HGNC Symbol;Acc:HGNC:12326]                                                       | -1.1236232  |
| TRPC6   | transient receptor potential cation channel subfamily C member 6 [Source:HGNC Symbol;Acc:HGNC:1233] | -1.3125032  |
| TRPM2   | transient receptor potential cation channel subfamily M member 2 [Source:HGNC Symbol;Acc:HGNC:1233] | 1.1360066   |
| TRPM8   | transient receptor potential cation channel subfamily M member 8 [Source:HGNC Symbol;Acc:HGNC:1796] | -1.104008   |
| TRPV6   | transient receptor potential cation channel subfamily V member 6 [Source:HGNC Symbol;Acc:HGNC:1400] | -1.1317482  |
| TRUB1   | TruB pseudouridine synthase family member 1 [Source:HGNC Symbol;Acc:HGNC:16060]                     | 1.4186193   |
| TSC22D4 | TSC22 domain family member 4 [Source:HGNC Symbol;Acc:HGNC:21696]                                    | 1.2351038   |
| TSFM    | Ts translation elongation factor, mitochondrial [Source:HGNC Symbol;Acc:HGNC:12367]                 | 1.0869668   |
| TSGL101 | tumor susceptibility 101 [Source:HGNC Symbol;Acc:HGNC:15971]                                        | -1.2770367  |
| TSGA10  | testis specific 10 [Source:HGNC Symbol;Acc:HGNC:14927]                                              | 1.0654902   |
| TSHZ1   | teashirt zinc finger homeobox 1 [Source:HGNC Symbol;Acc:HGNC:10669]                                 | 1.3527504   |
| TSKS    | testis specific serine kinase substrate [Source:HGNC Symbol;Acc:HGNC:30719]                         | 1.0732895   |
| TSKU    | tsukushi, small leucine rich proteoglycan [Source:HGNC Symbol;Acc:HGNC:28850]                       | -1.186316   |
| TSL     | testis-expressed, seven-twelve, leukemia                                                            | -1.1505249  |
| TSLP    | thymic stromal lymphopoietin [Source:HGNC Symbol;Acc:HGNC:30743]                                    | 1.1000466   |
| TSNAX   | translin associated factor X [Source:HGNC Symbol;Acc:HGNC:12380]                                    | 1.2380335   |
| TSpan1  | tetraspanin 1 [Source:HGNC Symbol;Acc:HGNC:20657]                                                   | -1.1788192  |
| TSPAN12 | tetraspanin 12 [Source:HGNC Symbol;Acc:HGNC:21641]                                                  | 1.5059534   |
| TSPAN14 | tetraspanin 14 [Source:HGNC Symbol;Acc:HGNC:23303]                                                  | 1.358315233 |
| TSPAN18 | tetraspanin 18 [Source:HGNC Symbol;Acc:HGNC:20660]                                                  | -1.1542375  |
| TSPYL2  | TSPY like 2 [Source:HGNC Symbol;Acc:HGNC:24358]                                                     | 1.335354    |
| TSPYL5  | TSPY like 5 [Source:HGNC Symbol;Acc:HGNC:29367]                                                     | -1.1418211  |
| TSPYL6  | TSPY like 6 [Source:HGNC Symbol;Acc:HGNC:14521]                                                     | 1.0548588   |
| TTC24   | tetratricopeptide repeat domain 24 [Source:HGNC Symbol;Acc:HGNC:32348]                              | -1.1401285  |
| TTC28   | tetratricopeptide repeat domain 28 [Source:HGNC Symbol;Acc:HGNC:29179]                              | -1.0991809  |
| TTC30B  | tetratricopeptide repeat domain 30B [Source:HGNC Symbol;Acc:HGNC:26425]                             | 1.099937    |
| TTC34   | tetratricopeptide repeat domain 34 [Source:HGNC Symbol;Acc:HGNC:34297]                              | -1.0974952  |
| TTC39A  | tetratricopeptide repeat domain 39A [Source:HGNC Symbol;Acc:HGNC:18657]                             | -1.4693576  |
| TTC39C  | tetratricopeptide repeat domain 39C [Source:HGNC Symbol;Acc:HGNC:26595]                             | -1.23741475 |
| TTC5    | tetratricopeptide repeat domain 5 [Source:HGNC Symbol;Acc:HGNC:19274]                               | 1.3890661   |
| TTC9C   | tetratricopeptide repeat domain 9C [Source:HGNC Symbol;Acc:HGNC:28432]                              | -1.1699338  |
| TTL     | tubulin tyrosine ligase [Source:HGNC Symbol;Acc:HGNC:21586]                                         | -1.1386338  |
| TTL4    | tubulin tyrosine ligase like 4 [Source:HGNC Symbol;Acc:HGNC:28976]                                  | -1.2866039  |
| TTL9    | tubulin tyrosine ligase like 9 [Source:HGNC Symbol;Acc:HGNC:16118]                                  | -1.0868782  |
| TTY13   | testis-specific transcript, Y-linked 13 (non-protein coding) [Source:HGNC Symbol;Acc:HGNC:18494]    | -1.0855936  |
| TTY14   | testis-specific transcript, Y-linked 14 (non-protein coding) [Source:HGNC Symbol;Acc:HGNC:18495]    | -1.3316395  |
| TTY3    | testis-specific transcript, Y-linked 3 (non-protein coding) [Source:HGNC Symbol;Acc:HGNC:16480]     | 1.1542276   |
| TTY4C   | testis-specific transcript, Y-linked 4C (non-protein coding) [Source:HGNC Symbol;Acc:HGNC:31892]    | 1.0599645   |
| TUB     | tubby bipartite transcription factor [Source:HGNC Symbol;Acc:HGNC:12406]                            | 1.1466547   |
| TUBA4A  | tubulin alpha 4a [Source:HGNC Symbol;Acc:HGNC:12407]                                                | 1.180965    |
| TUBA8   | tubulin alpha 8 [Source:HGNC Symbol;Acc:HGNC:12410]                                                 | 1.3726145   |
| TUBAL3  | tubulin alpha like 3 [Source:HGNC Symbol;Acc:HGNC:23534]                                            | 1.0916649   |
| TUBB2A  | tubulin beta 2A class IIa [Source:HGNC Symbol;Acc:HGNC:12412]                                       | -1.3976978  |
| TUBB2B  | tubulin beta 2B class IIb [Source:HGNC Symbol;Acc:HGNC:30829]                                       | -2.0936594  |
| TUBB8   | tubulin beta 8 class VIII [Source:HGNC Symbol;Acc:HGNC:20773]                                       | -1.2128648  |
| TUBBP5  | tubulin beta pseudogene 5 [Source:HGNC Symbol;Acc:HGNC:23674]                                       | -1.1514122  |
| TUBG2   | tubulin gamma 2 [Source:HGNC Symbol;Acc:HGNC:12419]                                                 | -1.1193223  |
| TUBGCP3 | tubulin gamma complex associated protein 3 [Source:HGNC Symbol;Acc:HGNC:18598]                      | 1.0931134   |
| TUBGCP5 | tubulin gamma complex associated protein 5 [Source:HGNC Symbol;Acc:HGNC:18600]                      | 1.2224793   |
| TULP2   | tubby like protein 2 [Source:HGNC Symbol;Acc:HGNC:12424]                                            | 1.1218727   |
| TIW12   | twist family bHLH transcription factor 2 [Source:HGNC Symbol;Acc:HGNC:20670]                        | -1.421087   |
| TIW12NB | TIW12 neighbor [Source:HGNC Symbol;Acc:HGNC:18027]                                                  | 1.4070615   |
| TWSG1   | twisted gastrulation BMP signaling modulator 1 [Source:HGNC Symbol;Acc:HGNC:12429]                  | 1.4226744   |
| TXK     | TXK tyrosine kinase [Source:HGNC Symbol;Acc:HGNC:12434]                                             | 1.2076851   |
| TXLNB   | taxilin beta [Source:HGNC Symbol;Acc:HGNC:21617]                                                    | 1.0959263   |
| TXNDC15 | thioredoxin domain containing 15 [Source:HGNC Symbol;Acc:HGNC:20652]                                | -1.2350338  |
| TXNDC9  | thioredoxin domain containing 9 [Source:HGNC Symbol;Acc:HGNC:24110]                                 | 1.6127372   |
| TXNL4A  | thioredoxin like 4A [Source:HGNC Symbol;Acc:HGNC:30551]                                             | 1.1648793   |
| TYK2    | tyrosine kinase 2 [Source:HGNC Symbol;Acc:HGNC:12440]                                               | -1.2067227  |
| TVSND1  | trypsin domain containing 1 [Source:HGNC Symbol;Acc:HGNC:28531]                                     | 1.2387348   |
| UBA2    | ubiquitin like modifier activating enzyme 2 [Source:HGNC Symbol;Acc:HGNC:30661]                     | 1.27021895  |
| UBA7    | ubiquitin like modifier activating enzyme 7 [Source:HGNC Symbol;Acc:HGNC:12471]                     | -1.2822809  |
| UBAC1   | UBA domain containing 1 [Source:HGNC Symbol;Acc:HGNC:30221]                                         | -1.212058   |
| UBAP1   | ubiquitin associated protein 1 [Source:HGNC Symbol;Acc:HGNC:12461]                                  | -1.1657261  |
| UBAP2   | ubiquitin associated protein 2 [Source:HGNC Symbol;Acc:HGNC:14185]                                  | -1.0620881  |
| UBAP2L  | ubiquitin associated protein 2 like [Source:HGNC Symbol;Acc:HGNC:29877]                             | -1.17111275 |
| UBD     | ubiquitin D [Source:HGNC Symbol;Acc:HGNC:18795]                                                     | -13.445234  |
| UBE2A   | ubiquitin conjugating enzyme E2 A [Source:HGNC Symbol;Acc:HGNC:12472]                               | -1.1870227  |
| UBE2CBP | ubiquitin protein ligase E3D                                                                        | -1.0794846  |
| UBE2D2  | ubiquitin conjugating enzyme E2 D2 [Source:HGNC Symbol;Acc:HGNC:12475]                              | -1.1681869  |
| UBE2D4  | ubiquitin conjugating enzyme E2 D4 (putative) [Source:HGNC Symbol;Acc:HGNC:21647]                   | -1.1512454  |
| UBE2E2  | ubiquitin conjugating enzyme E2 E2 [Source:HGNC Symbol;Acc:HGNC:12478]                              | -1.2058421  |
| UBE2H   | ubiquitin conjugating enzyme E2 H [Source:HGNC Symbol;Acc:HGNC:12484]                               | -1.2265989  |
| UBE2J2  | ubiquitin conjugating enzyme E2 J2 [Source:HGNC Symbol;Acc:HGNC:19268]                              | -1.092073   |
| UBE2L6  | ubiquitin conjugating enzyme E2 L6 [Source:HGNC Symbol;Acc:HGNC:12490]                              | -1.2425293  |
| UBE2O   | ubiquitin conjugating enzyme E2 O [Source:HGNC Symbol;Acc:HGNC:29554]                               | -1.2188761  |

|          |                                                                                                   |              |
|----------|---------------------------------------------------------------------------------------------------|--------------|
| UBE2Q2   | ubiquitin conjugating enzyme E2 Q2 [Source:HGNC Symbol;Acc:HGNC:19248]                            | 1.301491     |
| UBE2S    | ubiquitin conjugating enzyme E2 S [Source:HGNC Symbol;Acc:HGNC:17895]                             | 1.1708115    |
| UBE2T    | ubiquitin conjugating enzyme E2 T [Source:HGNC Symbol;Acc:HGNC:25009]                             | 1.3093588    |
| UBE2Z    | ubiquitin conjugating enzyme E2 Z [Source:HGNC Symbol;Acc:HGNC:25847]                             | -1.199173    |
| UBE3B    | ubiquitin protein ligase E3B [Source:HGNC Symbol;Acc:HGNC:13478]                                  | -1.12858895  |
| UBFD1    | ubiquitin family domain containing 1 [Source:HGNC Symbol;Acc:HGNC:30565]                          | -1.2599049   |
| UBQLN2   | ubiquilin 2 [Source:HGNC Symbol;Acc:HGNC:12509]                                                   | -1.3322608   |
| UBQLN3   | ubiquilin 3 [Source:HGNC Symbol;Acc:HGNC:12510]                                                   | -1.1765635   |
| UBR4     | ubiquitin protein ligase E3 component n-recognin 4 [Source:HGNC Symbol;Acc:HGNC:30313]            | -1.2233404   |
| UBR7     | ubiquitin protein ligase E3 component n-recognin 7 (putative) [Source:HGNC Symbol;Acc:HGNC:20344] | 1.1899208    |
| UBTF     | upstream binding transcription factor, RNA polymerase I [Source:HGNC Symbol;Acc:HGNC:12511]       | 1.3408439    |
| UBXN8    | UBX domain protein 8 [Source:HGNC Symbol;Acc:HGNC:30307]                                          | 1.0647758    |
| UCHL5    | ubiquitin C-terminal hydrolase L5 [Source:HGNC Symbol;Acc:HGNC:19678]                             | 1.34053575   |
| UCMA     | upper zone of growth plate and cartilage matrix associated [Source:HGNC Symbol;Acc:HGNC:25205]    | -1.0508285   |
| UF1D1    | ubiquitin fusion degradation 1 like (yeast) [Source:HGNC Symbol;Acc:HGNC:12520]                   | -1.1013578   |
| UGGT2    | UDP-glucose glycoprotein glucosyltransferase 2 [Source:HGNC Symbol;Acc:HGNC:15664]                | 1.309824     |
| UHRF1BP1 | UHRF1 binding protein 1 [Source:HGNC Symbol;Acc:HGNC:21216]                                       | -1.2545043   |
| ULBP2    | UL16 binding protein 2 [Source:HGNC Symbol;Acc:HGNC:14894]                                        | 1.1818653    |
| ULK4     | unc-51 like kinase 4 [Source:HGNC Symbol;Acc:HGNC:15784]                                          | -1.0974432   |
| UMODL1   | uromodulin like 1 [Source:HGNC Symbol;Acc:HGNC:12560]                                             | -1.227653333 |
| UNC13B   | unc-13 homolog B [Source:HGNC Symbol;Acc:HGNC:12566]                                              | -1.1886598   |
| UNC5D    | unc-5 netrin receptor D [Source:HGNC Symbol;Acc:HGNC:18634]                                       | 1.0867689    |
| UNG      | uracil DNA glycosylase [Source:HGNC Symbol;Acc:HGNC:12572]                                        | 1.2404886    |
| UNKL     | unkempt family like zinc finger [Source:HGNC Symbol;Acc:HGNC:14184]                               | -1.2342783   |
| UPB1     | beta-ureidopropionase 1 [Source:HGNC Symbol;Acc:HGNC:16297]                                       | -1.0942532   |
| UPK3B    | uroplakin 3B [Source:HGNC Symbol;Acc:HGNC:21444]                                                  | -1.1277776   |
| UPP1     | uridine phosphorylase 1 [Source:HGNC Symbol;Acc:HGNC:12576]                                       | -1.43313055  |
| UPRT     | uracil phosphoribosyltransferase homolog [Source:HGNC Symbol;Acc:HGNC:28334]                      | 1.13826065   |
| UQCC     | ubiquinol-cytochrome c reductase complex assembly factor 1                                        | -1.064101    |
| URB1     | URB1 ribosome biogenesis 1 homolog (S. cerevisiae) [Source:HGNC Symbol;Acc:HGNC:17344]            | -1.146531    |
| URGCP    | upregulator of cell proliferation [Source:HGNC Symbol;Acc:HGNC:30890]                             | -1.2461512   |
| USH2A    | usherin [Source:HGNC Symbol;Acc:HGNC:12601]                                                       | 1.1208235    |
| USP11    | ubiquitin specific peptidase 11 [Source:HGNC Symbol;Acc:HGNC:12609]                               | -1.1985438   |
| USP17    | ubiquitin specific peptidase 17-like family member 9, pseudogene                                  | 1.0650381    |
| USP31    | ubiquitin specific peptidase 31 [Source:HGNC Symbol;Acc:HGNC:20060]                               | -1.5834881   |
| USP33    | ubiquitin specific peptidase 33 [Source:HGNC Symbol;Acc:HGNC:20059]                               | 1.1261317    |
| USP36    | ubiquitin specific peptidase 36 [Source:HGNC Symbol;Acc:HGNC:20062]                               | -1.4490665   |
| USP38    | ubiquitin specific peptidase 38 [Source:HGNC Symbol;Acc:HGNC:20067]                               | 1.2359266    |
| USP45    | ubiquitin specific peptidase 45 [Source:HGNC Symbol;Acc:HGNC:20080]                               | 1.1660931    |
| USP49    | ubiquitin specific peptidase 49 [Source:HGNC Symbol;Acc:HGNC:20078]                               | -1.1702685   |
| USP5     | ubiquitin specific peptidase 5 [Source:HGNC Symbol;Acc:HGNC:12628]                                | 1.2452204    |
| USP51    | ubiquitin specific peptidase 51 [Source:HGNC Symbol;Acc:HGNC:23086]                               | 1.1184583    |
| USP54    | ubiquitin specific peptidase 54 [Source:HGNC Symbol;Acc:HGNC:23513]                               | -1.1127272   |
| UVRAG    | UV radiation resistance associated [Source:HGNC Symbol;Acc:HGNC:12640]                            | -1.4342183   |
| VAC14    | Vac14, PIKFYVE complex component [Source:HGNC Symbol;Acc:HGNC:25507]                              | -1.1425991   |
| VAMP7    | vesicle associated membrane protein 7 [Source:HGNC Symbol;Acc:HGNC:11486]                         | 1.380774     |
| VARS2    | valyl-tRNA synthetase 2, mitochondrial [Source:HGNC Symbol;Acc:HGNC:21642]                        | 1.209421     |
| VASH1    | vasohibin 1 [Source:HGNC Symbol;Acc:HGNC:19964]                                                   | 1.2086797    |
| VAT1     | vesicle amine transport 1 [Source:HGNC Symbol;Acc:HGNC:16919]                                     | 1.48712755   |
| VAV2     | vav guanine nucleotide exchange factor 2 [Source:HGNC Symbol;Acc:HGNC:12658]                      | -1.5332677   |
| VAX2     | ventral anterior homeobox 2 [Source:HGNC Symbol;Acc:HGNC:12661]                                   | -1.266751    |
| VCAM1    | vascular cell adhesion molecule 1 [Source:HGNC Symbol;Acc:HGNC:12663]                             | -10.085852   |
| VCY      | variable charge, Y-linked [Source:HGNC Symbol;Acc:HGNC:12668]                                     | -1.1203098   |
| VDAC2    | voltage dependent anion channel 2 [Source:HGNC Symbol;Acc:HGNC:12672]                             | -1.2801745   |
| VDR      | vitamin D (1,25-dihydroxyvitamin D3) receptor [Source:HGNC Symbol;Acc:HGNC:12679]                 | -1.1874926   |
| VEGFA    | vascular endothelial growth factor A [Source:HGNC Symbol;Acc:HGNC:12680]                          | -1.39839035  |
| VGLL4    | vestigial like family member 4 [Source:HGNC Symbol;Acc:HGNC:28966]                                | -1.4039645   |
| VIT      | vitrin [Source:HGNC Symbol;Acc:HGNC:12697]                                                        | -1.2075036   |
| VMA21    | VMA21 vacuolar H+-ATPase homolog (S. cerevisiae) [Source:HGNC Symbol;Acc:HGNC:22082]              | 1.4221191    |
| VNN2     | vanin 2 [Source:HGNC Symbol;Acc:HGNC:12706]                                                       | -1.1859345   |
| VPRBP    | DDB1 and CUL4 associated factor 1                                                                 | -1.1331074   |
| VPS24    | charged multivesicular body protein 3                                                             | 1.1542709    |
| VPS26A   | VPS26, retromer complex component A [Source:HGNC Symbol;Acc:HGNC:12711]                           | 1.2515216    |
| VPS35    | VPS35, retromer complex component [Source:HGNC Symbol;Acc:HGNC:13487]                             | 1.1885247    |
| VPS37A   | VPS37A, ESCRT-I subunit [Source:HGNC Symbol;Acc:HGNC:24928]                                       | -1.2342338   |
| VPS37C   | VPS37C, ESCRT-I subunit [Source:HGNC Symbol;Acc:HGNC:26097]                                       | -1.3744162   |
| VPS37D   | VPS37D, ESCRT-I subunit [Source:HGNC Symbol;Acc:HGNC:18287]                                       | 1.467897     |
| VPS8     | VPS8, CORVET complex subunit [Source:HGNC Symbol;Acc:HGNC:29122]                                  | 1.0975047    |
| VRTN     | vertebrae development associated [Source:HGNC Symbol;Acc:HGNC:20223]                              | 1.0938108    |
| VSIG10   | V-set and immunoglobulin domain containing 10 [Source:HGNC Symbol;Acc:HGNC:26078]                 | 1.2436857    |
| VSTM1    | V-set and transmembrane domain containing 1 [Source:HGNC Symbol;Acc:HGNC:29455]                   | -2.0998054   |
| VSTM2A   | V-set and transmembrane domain containing 2A [Source:HGNC Symbol;Acc:HGNC:28499]                  | 1.0857421    |
| VTI1A    | vesicle transport through interaction with t-SNAREs 1A [Source:HGNC Symbol;Acc:HGNC:17792]        | -1.1884581   |
| WARS     | tryptophanyl-tRNA synthetase [Source:HGNC Symbol;Acc:HGNC:12729]                                  | -1.3721117   |
| WASF2    | WAS protein family member 2 [Source:HGNC Symbol;Acc:HGNC:12733]                                   | -1.462956    |
| WASH1    | WAS protein family homolog 1 [Source:HGNC Symbol;Acc:HGNC:24361]                                  | 1.1659089    |
| WDFY4    | WDFY family member 4 [Source:HGNC Symbol;Acc:HGNC:29323]                                          | 1.26858025   |
| WDHD1    | WD repeat and HMGB-box DNA binding protein 1 [Source:HGNC Symbol;Acc:HGNC:23170]                  | 1.5514395    |
| WDR1     | WD repeat domain 1 [Source:HGNC Symbol;Acc:HGNC:12754]                                            | -1.2626114   |
| WDR17    | WD repeat domain 17 [Source:HGNC Symbol;Acc:HGNC:16661]                                           | 1.0526505    |
| WDR19    | WD repeat domain 19 [Source:HGNC Symbol;Acc:HGNC:18340]                                           | 1.1199018    |
| WDR33    | WD repeat domain 33 [Source:HGNC Symbol;Acc:HGNC:25651]                                           | -1.164613    |
| WDR43    | WD repeat domain 43 [Source:HGNC Symbol;Acc:HGNC:28945]                                           | 1.3135468    |
| WDR45    | WD repeat domain 45 [Source:HGNC Symbol;Acc:HGNC:28912]                                           | -1.1269876   |
| WDR45L   | WD repeat domain 45B                                                                              | -1.2680389   |
| WDR48    | WD repeat domain 48 [Source:HGNC Symbol;Acc:HGNC:30914]                                           | -1.2804276   |

|         |                                                                                                                    |             |
|---------|--------------------------------------------------------------------------------------------------------------------|-------------|
| WDR52   | cilia and flagella associated protein 44                                                                           | 1.0673912   |
| WDR55   | WD repeat domain 55 [Source:HGNC Symbol;Acc:HGNC:25971]                                                            | -1.1077034  |
| WDR59   | WD repeat domain 59 [Source:HGNC Symbol;Acc:HGNC:25706]                                                            | -1.1465641  |
| WDR72   | WD repeat domain 72 [Source:HGNC Symbol;Acc:HGNC:26790]                                                            | 1.1288078   |
| WDR82   | WD repeat domain 82 [Source:HGNC Symbol;Acc:HGNC:28826]                                                            | -1.2486362  |
| WDR83   | WD repeat domain 83 [Source:HGNC Symbol;Acc:HGNC:32672]                                                            | -1.1777533  |
| WDR86   | WD repeat domain 86 [Source:HGNC Symbol;Acc:HGNC:28020]                                                            | 1.0679293   |
| WDR89   | WD repeat domain 89 [Source:HGNC Symbol;Acc:HGNC:20489]                                                            | 1.1597314   |
| WEE2    | WEE1 homolog 2 (S. pombe) [Source:HGNC Symbol;Acc:HGNC:19684]                                                      | -1.0791117  |
| WFD2    | WAP four-disulfide core domain 2 [Source:HGNC Symbol;Acc:HGNC:15939]                                               | -1.1406696  |
| WFD8    | WAP four-disulfide core domain 8 [Source:HGNC Symbol;Acc:HGNC:16163]                                               | -1.1687293  |
| WHAMM   | WASP domain homolog associated with actin, golgi membranes and microtubules [Source:HGNC Symbol;Acc:HGNC:12539296] | -1.2539296  |
| WHSC1L1 | Wolf-Hirschhorn syndrome candidate 1-like 1 [Source:HGNC Symbol;Acc:HGNC:12767]                                    | 1.1519984   |
| WIPF1   | WAS/WASL interacting protein family member 1 [Source:HGNC Symbol;Acc:HGNC:12736]                                   | 1.1068803   |
| WIP2    | WD repeat domain, phosphoinositide interacting 2 [Source:HGNC Symbol;Acc:HGNC:32225]                               | -1.163766   |
| WISP2   | WNT1 inducible signaling pathway protein 2 [Source:HGNC Symbol;Acc:HGNC:12770]                                     | 1.0572568   |
| WISP3   | WNT1 inducible signaling pathway protein 3 [Source:HGNC Symbol;Acc:HGNC:12771]                                     | -1.0808573  |
| WLS     | wntless Wnt ligand secretion mediator [Source:HGNC Symbol;Acc:HGNC:30238]                                          | -1.1506457  |
| WNT1    | Wnt family member 1 [Source:HGNC Symbol;Acc:HGNC:12774]                                                            | -1.09567875 |
| WNT3A   | Wnt family member 3A [Source:HGNC Symbol;Acc:HGNC:15983]                                                           | -1.0637966  |
| WNT5A   | Wnt family member 5A [Source:HGNC Symbol;Acc:HGNC:12784]                                                           | -1.6691802  |
| WTAP    | Wilms tumor 1 associated protein [Source:HGNC Symbol;Acc:HGNC:16846]                                               | -1.129792   |
| WTIP    | Wilms tumor 1 interacting protein [Source:HGNC Symbol;Acc:HGNC:20964]                                              | 1.2016112   |
| WWC1    | WW and C2 domain containing 1 [Source:HGNC Symbol;Acc:HGNC:29435]                                                  | -2.5356345  |
| WWP2    | WW domain containing E3 ubiquitin protein ligase 2 [Source:HGNC Symbol;Acc:HGNC:16804]                             | -1.4202142  |
| XAF1    | XIAP associated factor 1 [Source:HGNC Symbol;Acc:HGNC:30932]                                                       | -1.1740229  |
| XAGE5   | X antigen family member 5 [Source:HGNC Symbol;Acc:HGNC:30930]                                                      | 1.069012    |
| XPB1    | X-box binding protein 1 [Source:HGNC Symbol;Acc:HGNC:12801]                                                        | -1.1260592  |
| XCR1    | X-C motif chemokine receptor 1 [Source:HGNC Symbol;Acc:HGNC:1625]                                                  | -1.2454274  |
| XKR8    | XK related 8 [Source:HGNC Symbol;Acc:HGNC:25508]                                                                   | -1.1272233  |
| XPC     | PC complex subunit, DNA damage recognition and repair factor [Source:HGNC Symbol;Acc:HGNC:12811]                   | -1.2646662  |
| XPNPEP1 | X-prolyl aminopeptidase 1 [Source:HGNC Symbol;Acc:HGNC:12822]                                                      | -1.1657184  |
| XPO5    | exportin 5 [Source:HGNC Symbol;Acc:HGNC:17675]                                                                     | -1.16941175 |
| XYLT1   | xylosyltransferase 1 [Source:HGNC Symbol;Acc:HGNC:15516]                                                           | 1.1594994   |
| YARS2   | tyrosyl-tRNA synthetase 2 [Source:HGNC Symbol;Acc:HGNC:24249]                                                      | -1.1056728  |
| YBX2    | Y-box binding protein 2 [Source:HGNC Symbol;Acc:HGNC:17948]                                                        | -1.1731076  |
| YIPF5   | Yip1 domain family member 5 [Source:HGNC Symbol;Acc:HGNC:24877]                                                    | 1.2504514   |
| YIPF6   | Yip1 domain family member 6 [Source:HGNC Symbol;Acc:HGNC:28304]                                                    | 1.12574     |
| YLPM1   | YLP motif containing 1 [Source:HGNC Symbol;Acc:HGNC:17798]                                                         | 1.209155    |
| YPEL1   | yippee like 1 [Source:HGNC Symbol;Acc:HGNC:12845]                                                                  | -1.205815   |
| YPEL2   | yippee like 2 [Source:HGNC Symbol;Acc:HGNC:18326]                                                                  | -1.8998111  |
| YPEL3   | yippee like 3 [Source:HGNC Symbol;Acc:HGNC:18327]                                                                  | 1.229277    |
| YPEL5   | yippee like 5 [Source:HGNC Symbol;Acc:HGNC:18329]                                                                  | -1.3385253  |
| YRDC    | yrdC N6-threonylcarbamoyltransferase domain containing [Source:HGNC Symbol;Acc:HGNC:28905]                         | 1.1165332   |
| ZADH2   | zinc binding alcohol dehydrogenase domain containing 2 [Source:HGNC Symbol;Acc:HGNC:28697]                         | 1.268781    |
| ZAN     | zonadhesin (gene/pseudogene) [Source:HGNC Symbol;Acc:HGNC:12857]                                                   | -1.1670691  |
| ZBTB17  | zinc finger and BTB domain containing 17 [Source:HGNC Symbol;Acc:HGNC:12936]                                       | -1.2479687  |
| ZBTB24  | zinc finger and BTB domain containing 24 [Source:HGNC Symbol;Acc:HGNC:21143]                                       | 1.2514802   |
| ZBTB3   | zinc finger and BTB domain containing 3 [Source:HGNC Symbol;Acc:HGNC:22918]                                        | -1.0880046  |
| ZBTB4   | zinc finger and BTB domain containing 4 [Source:HGNC Symbol;Acc:HGNC:23847]                                        | 1.1348364   |
| ZBTB40  | zinc finger and BTB domain containing 40 [Source:HGNC Symbol;Acc:HGNC:29045]                                       | -1.0896063  |
| ZBTB45  | zinc finger and BTB domain containing 45 [Source:HGNC Symbol;Acc:HGNC:23715]                                       | 1.2066642   |
| ZBTB46  | zinc finger and BTB domain containing 46 [Source:HGNC Symbol;Acc:HGNC:16094]                                       | -1.5893101  |
| ZBTB49  | zinc finger and BTB domain containing 49 [Source:HGNC Symbol;Acc:HGNC:19883]                                       | -1.1526476  |
| ZBTB5   | zinc finger and BTB domain containing 5 [Source:HGNC Symbol;Acc:HGNC:23836]                                        | -1.4475629  |
| ZBTB80S | zinc finger and BTB domain containing 8 opposite strand [Source:HGNC Symbol;Acc:HGNC:24094]                        | 1.1038494   |
| ZC3H12A | zinc finger CCCH-type containing 12A [Source:HGNC Symbol;Acc:HGNC:26259]                                           | -2.0054114  |
| ZC3H4   | zinc finger CCCH-type containing 4 [Source:HGNC Symbol;Acc:HGNC:17808]                                             | -1.1597759  |
| ZC3H7B  | zinc finger CCCH-type containing 7B [Source:HGNC Symbol;Acc:HGNC:30869]                                            | -2.3005502  |
| ZC3HAV1 | zinc finger CCCH-type containing, antiviral 1 [Source:HGNC Symbol;Acc:HGNC:23721]                                  | -1.2117912  |
| ZCCHC2  | zinc finger CCHC-type containing 2 [Source:HGNC Symbol;Acc:HGNC:22916]                                             | 1.8132063   |
| ZCCHC24 | zinc finger CCHC-type containing 24 [Source:HGNC Symbol;Acc:HGNC:26911]                                            | 1.1488322   |
| ZCCHC5  | zinc finger CCHC-type containing 5 [Source:HGNC Symbol;Acc:HGNC:22997]                                             | 1.1156474   |
| ZCWPW1  | zinc finger CW-type and PWWP domain containing 1 [Source:HGNC Symbol;Acc:HGNC:23486]                               | -1.163759   |
| ZDHH14  | zinc finger DHHC-type containing 14 [Source:HGNC Symbol;Acc:HGNC:20341]                                            | -1.2710094  |
| ZDHH15  | zinc finger DHHC-type containing 15 [Source:HGNC Symbol;Acc:HGNC:20342]                                            | 1.0505561   |
| ZDHH20  | zinc finger DHHC-type containing 20 [Source:HGNC Symbol;Acc:HGNC:20749]                                            | -1.1040993  |
| ZDHH21  | zinc finger DHHC-type containing 21 [Source:HGNC Symbol;Acc:HGNC:20750]                                            | 1.177513    |
| ZDHH23  | zinc finger DHHC-type containing 23 [Source:HGNC Symbol;Acc:HGNC:28654]                                            | -1.123558   |
| ZDHH29  | zinc finger DHHC-type containing 9 [Source:HGNC Symbol;Acc:HGNC:18475]                                             | -1.1001143  |
| ZFAND1  | zinc finger AN1-type containing 1 [Source:HGNC Symbol;Acc:HGNC:25858]                                              | 1.4367543   |
| ZFAND2A | zinc finger AN1-type containing 2A [Source:HGNC Symbol;Acc:HGNC:28073]                                             | -1.5533625  |
| ZFAND3  | zinc finger AN1-type containing 3 [Source:HGNC Symbol;Acc:HGNC:18019]                                              | -1.0846007  |
| ZFAND5  | zinc finger AN1-type containing 5 [Source:HGNC Symbol;Acc:HGNC:13008]                                              | -1.2968843  |
| ZFAT    | zinc finger and AT-hook domain containing [Source:HGNC Symbol;Acc:HGNC:19899]                                      | -1.084601   |
| ZFH2    | zinc finger homeobox 2 [Source:HGNC Symbol;Acc:HGNC:20152]                                                         | -2.465378   |
| ZFP1    | ZFP1 zinc finger protein [Source:HGNC Symbol;Acc:HGNC:23328]                                                       | 1.2775093   |
| ZFP2    | ZFP2 zinc finger protein [Source:HGNC Symbol;Acc:HGNC:26138]                                                       | 1.105657    |
| ZFP36   | ZFP36 ring finger protein [Source:HGNC Symbol;Acc:HGNC:12862]                                                      | -1.1340337  |
| ZFP36L1 | ZFP36 ring finger protein like 1 [Source:HGNC Symbol;Acc:HGNC:1107]                                                | -1.76042705 |
| ZFP37   | ZFP37 zinc finger protein [Source:HGNC Symbol;Acc:HGNC:12863]                                                      | 1.112232    |
| ZFP92   | ZFP92 zinc finger protein [Source:HGNC Symbol;Acc:HGNC:12865]                                                      | -1.1326898  |
| ZFPM2   | zinc finger protein, FOG family member 2 [Source:HGNC Symbol;Acc:HGNC:16700]                                       | -2.0785728  |
| ZFX     | zinc finger protein, X-linked [Source:HGNC Symbol;Acc:HGNC:12869]                                                  | 1.1251149   |
| ZFYVE1  | zinc finger FYVE-type containing 1 [Source:HGNC Symbol;Acc:HGNC:13180]                                             | -1.1824155  |
| ZFYVE21 | zinc finger FYVE-type containing 21 [Source:HGNC Symbol;Acc:HGNC:20760]                                            | 1.1951897   |

|          |                                                                                        |             |
|----------|----------------------------------------------------------------------------------------|-------------|
| ZGLP1    | zinc finger, GATA-like protein 1 [Source:HGNC Symbol;Acc:HGNC:37245]                   | -1.3089877  |
| ZGPAT    | zinc finger CCH-type and G-patch domain containing [Source:HGNC Symbol;Acc:HGNC:15948] | -1.220549   |
| ZHX3     | zinc fingers and homeoboxes 3 [Source:HGNC Symbol;Acc:HGNC:15935]                      | 1.1633196   |
| ZKSCAN5  | zinc finger with KRAB and SCAN domains 5 [Source:HGNC Symbol;Acc:HGNC:12867]           | -1.1033795  |
| ZMIZ2    | zinc finger MIZ-type containing 2 [Source:HGNC Symbol;Acc:HGNC:22229]                  | -1.293919   |
| ZMPSTE24 | zinc metallopeptidase STE24 [Source:HGNC Symbol;Acc:HGNC:12877]                        | 1.3261002   |
| ZMYM3    | zinc finger MYM-type containing 3 [Source:HGNC Symbol;Acc:HGNC:13054]                  | 1.3185234   |
| ZMYND8   | zinc finger MYND-type containing 8 [Source:HGNC Symbol;Acc:HGNC:9397]                  | 1.497675    |
| ZNF117   | zinc finger protein 117 [Source:HGNC Symbol;Acc:HGNC:12897]                            | 1.2713103   |
| ZNF167   | zinc finger with KRAB and SCAN domains 7                                               | 1.1501613   |
| ZNF17    | zinc finger protein 17 [Source:HGNC Symbol;Acc:HGNC:12958]                             | 1.0940615   |
| ZNF175   | zinc finger protein 175 [Source:HGNC Symbol;Acc:HGNC:12964]                            | 1.4543692   |
| ZNF177   | zinc finger protein 177 [Source:HGNC Symbol;Acc:HGNC:12966]                            | 1.1073717   |
| ZNF18    | zinc finger protein 18 [Source:HGNC Symbol;Acc:HGNC:12969]                             | 1.2079582   |
| ZNF182   | zinc finger protein 182 [Source:HGNC Symbol;Acc:HGNC:13001]                            | 1.294628    |
| ZNF187   | zinc finger and SCAN domain containing 26                                              | 1.1880366   |
| ZNF2     | zinc finger protein 2 [Source:HGNC Symbol;Acc:HGNC:12991]                              | -1.1179156  |
| ZNF211   | zinc finger protein 211 [Source:HGNC Symbol;Acc:HGNC:13003]                            | 1.1110598   |
| ZNF212   | zinc finger protein 212 [Source:HGNC Symbol;Acc:HGNC:13004]                            | -1.1992812  |
| ZNF226   | zinc finger protein 226 [Source:HGNC Symbol;Acc:HGNC:13019]                            | -1.197759   |
| ZNF227   | zinc finger protein 227 [Source:HGNC Symbol;Acc:HGNC:13020]                            | 1.1459317   |
| ZNF229   | zinc finger protein 229 [Source:HGNC Symbol;Acc:HGNC:13022]                            | 1.073163    |
| ZNF236   | zinc finger protein 236 [Source:HGNC Symbol;Acc:HGNC:13028]                            | -1.1066201  |
| ZNF239   | zinc finger protein 239 [Source:HGNC Symbol;Acc:HGNC:13031]                            | 1.1393025   |
| ZNF253   | zinc finger protein 253 [Source:HGNC Symbol;Acc:HGNC:13497]                            | 1.0887128   |
| ZNF254   | zinc finger protein 254 [Source:HGNC Symbol;Acc:HGNC:13047]                            | 1.089705    |
| ZNF257   | zinc finger protein 257 [Source:HGNC Symbol;Acc:HGNC:13498]                            | 1.0890805   |
| ZNF259   | ZPR1 zinc finger                                                                       | -1.0642402  |
| ZNF273   | zinc finger protein 273 [Source:HGNC Symbol;Acc:HGNC:13067]                            | 1.1399068   |
| ZNF274   | zinc finger protein 274 [Source:HGNC Symbol;Acc:HGNC:13068]                            | -1.0999728  |
| ZNF275   | zinc finger protein 275 [Source:HGNC Symbol;Acc:HGNC:13069]                            | -1.2076259  |
| ZNF276   | zinc finger protein 276 [Source:HGNC Symbol;Acc:HGNC:23330]                            | -1.0509992  |
| ZNF28    | zinc finger protein 28 [Source:HGNC Symbol;Acc:HGNC:13073]                             | -1.1353784  |
| ZNF280C  | zinc finger protein 280C [Source:HGNC Symbol;Acc:HGNC:25955]                           | 1.2936234   |
| ZNF280D  | zinc finger protein 280D [Source:HGNC Symbol;Acc:HGNC:25953]                           | 1.1883162   |
| ZNF3     | zinc finger protein 3 [Source:HGNC Symbol;Acc:HGNC:13089]                              | -1.08778295 |
| ZNF30    | zinc finger protein 30 [Source:HGNC Symbol;Acc:HGNC:13090]                             | 1.5336546   |
| ZNF317   | zinc finger protein 317 [Source:HGNC Symbol;Acc:HGNC:13507]                            | -1.1925534  |
| ZNF32    | zinc finger protein 32 [Source:HGNC Symbol;Acc:HGNC:13095]                             | 1.1484997   |
| ZNF322A  | zinc finger protein 322                                                                | 1.2514639   |
| ZNF323   | zinc finger and SCAN domain containing 31                                              | 1.1024401   |
| ZNF334   | zinc finger protein 334 [Source:HGNC Symbol;Acc:HGNC:15806]                            | 1.0934173   |
| ZNF347   | zinc finger protein 347 [Source:HGNC Symbol;Acc:HGNC:16447]                            | 1.1871732   |
| ZNF362   | zinc finger protein 362 [Source:HGNC Symbol;Acc:HGNC:18079]                            | 1.2028642   |
| ZNF365   | zinc finger protein 365 [Source:HGNC Symbol;Acc:HGNC:18194]                            | 1.0663108   |
| ZNF366   | zinc finger protein 366 [Source:HGNC Symbol;Acc:HGNC:18316]                            | 1.210234    |
| ZNF378P  | zinc finger protein 378, pseudogene [Source:HGNC Symbol;Acc:HGNC:13103]                | 1.2542553   |
| ZNF385C  | zinc finger protein 385C [Source:HGNC Symbol;Acc:HGNC:33722]                           | -1.1461304  |
| ZNF385D  | zinc finger protein 385D [Source:HGNC Symbol;Acc:HGNC:26191]                           | -1.2046355  |
| ZNF391   | zinc finger protein 391 [Source:HGNC Symbol;Acc:HGNC:18779]                            | -1.1383842  |
| ZNF394   | zinc finger protein 394 [Source:HGNC Symbol;Acc:HGNC:18832]                            | -1.168117   |
| ZNF395   | zinc finger protein 395 [Source:HGNC Symbol;Acc:HGNC:18737]                            | 1.9529835   |
| ZNF396   | zinc finger protein 396 [Source:HGNC Symbol;Acc:HGNC:18824]                            | -1.1696907  |
| ZNF397   | zinc finger protein 397 [Source:HGNC Symbol;Acc:HGNC:18818]                            | 1.0773748   |
| ZNF416   | zinc finger protein 416 [Source:HGNC Symbol;Acc:HGNC:20645]                            | -1.0952274  |
| ZNF419   | zinc finger protein 419 [Source:HGNC Symbol;Acc:HGNC:20648]                            | 1.1647815   |
| ZNF420   | zinc finger protein 420 [Source:HGNC Symbol;Acc:HGNC:20649]                            | 1.1686157   |
| ZNF43    | zinc finger protein 43 [Source:HGNC Symbol;Acc:HGNC:13109]                             | 1.134512    |
| ZNF436   | zinc finger protein 436 [Source:HGNC Symbol;Acc:HGNC:20814]                            | -1.1847205  |
| ZNF454   | zinc finger protein 454 [Source:HGNC Symbol;Acc:HGNC:21200]                            | 1.1095998   |
| ZNF461   | zinc finger protein 461 [Source:HGNC Symbol;Acc:HGNC:21629]                            | 1.0850588   |
| ZNF469   | zinc finger protein 469 [Source:HGNC Symbol;Acc:HGNC:23216]                            | -1.4216908  |
| ZNF471   | zinc finger protein 471 [Source:HGNC Symbol;Acc:HGNC:23226]                            | 1.0641251   |
| ZNF474   | zinc finger protein 474 [Source:HGNC Symbol;Acc:HGNC:23245]                            | 1.0878664   |
| ZNF492   | zinc finger protein 492 [Source:HGNC Symbol;Acc:HGNC:23707]                            | 1.2333165   |
| ZNF501   | zinc finger protein 501 [Source:HGNC Symbol;Acc:HGNC:23717]                            | -1.0514839  |
| ZNF503   | zinc finger protein 503 [Source:HGNC Symbol;Acc:HGNC:23589]                            | 1.64230455  |
| ZNF512B  | zinc finger protein 512B [Source:HGNC Symbol;Acc:HGNC:29212]                           | 1.297833    |
| ZNF516   | zinc finger protein 516 [Source:HGNC Symbol;Acc:HGNC:28990]                            | -1.1448478  |
| ZNF521   | zinc finger protein 521 [Source:HGNC Symbol;Acc:HGNC:24605]                            | 1.52741565  |
| ZNF525   | zinc finger protein 525 [Source:HGNC Symbol;Acc:HGNC:29423]                            | 1.129231    |
| ZNF528   | zinc finger protein 528 [Source:HGNC Symbol;Acc:HGNC:29384]                            | 1.2033653   |
| ZNF540   | zinc finger protein 540 [Source:HGNC Symbol;Acc:HGNC:25331]                            | 1.0857469   |
| ZNF541   | zinc finger protein 541 [Source:HGNC Symbol;Acc:HGNC:25294]                            | -1.2774128  |
| ZNF557   | zinc finger protein 557 [Source:HGNC Symbol;Acc:HGNC:28632]                            | -1.1254169  |
| ZNF561   | zinc finger protein 561 [Source:HGNC Symbol;Acc:HGNC:28684]                            | 1.1797386   |
| ZNF562   | zinc finger protein 562 [Source:HGNC Symbol;Acc:HGNC:25950]                            | 1.1203179   |
| ZNF564   | zinc finger protein 564 [Source:HGNC Symbol;Acc:HGNC:31106]                            | 1.1938845   |
| ZNF568   | zinc finger protein 568 [Source:HGNC Symbol;Acc:HGNC:25392]                            | 1.1080962   |
| ZNF569   | zinc finger protein 569 [Source:HGNC Symbol;Acc:HGNC:24737]                            | 1.1405696   |
| ZNF57    | zinc finger protein 57 [Source:HGNC Symbol;Acc:HGNC:13125]                             | 1.2452599   |
| ZNF570   | zinc finger protein 570 [Source:HGNC Symbol;Acc:HGNC:26416]                            | -1.2491958  |
| ZNF572   | zinc finger protein 572 [Source:HGNC Symbol;Acc:HGNC:26758]                            | 1.16986     |
| ZNF575   | zinc finger protein 575 [Source:HGNC Symbol;Acc:HGNC:27606]                            | 1.2544311   |
| ZNF594   | zinc finger protein 594 [Source:HGNC Symbol;Acc:HGNC:29392]                            | 1.1630619   |
| ZNF597   | zinc finger protein 597 [Source:HGNC Symbol;Acc:HGNC:26573]                            | -1.1273812  |

|         |                                                                                                    |             |
|---------|----------------------------------------------------------------------------------------------------|-------------|
| ZNF598  | zinc finger protein 598 [Source:HGNC Symbol;Acc:HGNC:28079]                                        | 1.081171    |
| ZNF599  | zinc finger protein 599 [Source:HGNC Symbol;Acc:HGNC:26408]                                        | 1.095206    |
| ZNF613  | zinc finger protein 613 [Source:HGNC Symbol;Acc:HGNC:25827]                                        | 1.1972141   |
| ZNF630  | zinc finger protein 630 [Source:HGNC Symbol;Acc:HGNC:28855]                                        | 1.0816106   |
| ZNF641  | zinc finger protein 641 [Source:HGNC Symbol;Acc:HGNC:31834]                                        | -1.46716195 |
| ZNF642  | ZFP69 zinc finger protein                                                                          | 1.1753061   |
| ZNF646  | zinc finger protein 646 [Source:HGNC Symbol;Acc:HGNC:29004]                                        | 1.0626562   |
| ZNF658  | zinc finger protein 658 [Source:HGNC Symbol;Acc:HGNC:25226]                                        | 1.2106973   |
| ZNF660  | zinc finger protein 660 [Source:HGNC Symbol;Acc:HGNC:26720]                                        | 1.077062    |
| ZNF664  | zinc finger protein 664                                                                            | -1.9485675  |
| ZNF665  | zinc finger protein 665 [Source:HGNC Symbol;Acc:HGNC:25885]                                        | -1.1918615  |
| ZNF670  | zinc finger protein 670 [Source:HGNC Symbol;Acc:HGNC:28167]                                        | -1.2311835  |
| ZNF680  | zinc finger protein 680 [Source:HGNC Symbol;Acc:HGNC:26897]                                        | -1.0838039  |
| ZNF69   | zinc finger protein 69 [Source:HGNC Symbol;Acc:HGNC:13138]                                         | 1.1241014   |
| ZNF692  | zinc finger protein 692 [Source:HGNC Symbol;Acc:HGNC:26049]                                        | 1.360567    |
| ZNF696  | zinc finger protein 696 [Source:HGNC Symbol;Acc:HGNC:25872]                                        | -1.1619598  |
| ZNF697  | zinc finger protein 697 [Source:HGNC Symbol;Acc:HGNC:32034]                                        | -1.7919658  |
| ZNF701  | zinc finger protein 701 [Source:HGNC Symbol;Acc:HGNC:25597]                                        | 1.0940293   |
| ZNF703  | zinc finger protein 703 [Source:HGNC Symbol;Acc:HGNC:25883]                                        | 1.6431783   |
| ZNF705A | zinc finger protein 705A [Source:HGNC Symbol;Acc:HGNC:32281]                                       | 1.1490581   |
| ZNF708  | zinc finger protein 708 [Source:HGNC Symbol;Acc:HGNC:12945]                                        | 1.1125325   |
| ZNF71   | zinc finger protein 71 [Source:HGNC Symbol;Acc:HGNC:13141]                                         | -2.4892387  |
| ZNF718  | zinc finger protein 718 [Source:HGNC Symbol;Acc:HGNC:26889]                                        | 1.155425    |
| ZNF746  | zinc finger protein 746 [Source:HGNC Symbol;Acc:HGNC:21948]                                        | 1.1012286   |
| ZNF766  | zinc finger protein 766 [Source:HGNC Symbol;Acc:HGNC:28063]                                        | 1.2957864   |
| ZNF767  | zinc finger family member 767, pseudogene                                                          | -1.1369865  |
| ZNF772  | zinc finger protein 772 [Source:HGNC Symbol;Acc:HGNC:33106]                                        | -1.0790421  |
| ZNF773  | zinc finger protein 773 [Source:HGNC Symbol;Acc:HGNC:30487]                                        | -1.0893824  |
| ZNF780B | zinc finger protein 780B [Source:HGNC Symbol;Acc:HGNC:33109]                                       | 1.1300204   |
| ZNF782  | zinc finger protein 782 [Source:HGNC Symbol;Acc:HGNC:33110]                                        | 1.061037    |
| ZNF790  | zinc finger protein 790 [Source:HGNC Symbol;Acc:HGNC:33114]                                        | 1.1636827   |
| ZNF791  | zinc finger protein 791 [Source:HGNC Symbol;Acc:HGNC:26895]                                        | -1.0760626  |
| ZNF792  | zinc finger protein 792 [Source:HGNC Symbol;Acc:HGNC:24751]                                        | 1.24532705  |
| ZNF8    | zinc finger protein 8 [Source:HGNC Symbol;Acc:HGNC:13154]                                          | -1.137526   |
| ZNF813  | zinc finger protein 813 [Source:HGNC Symbol;Acc:HGNC:33257]                                        | -1.0545633  |
| ZNF827  | zinc finger protein 827 [Source:HGNC Symbol;Acc:HGNC:27193]                                        | -1.1240923  |
| ZNF830  | zinc finger protein 830 [Source:HGNC Symbol;Acc:HGNC:28291]                                        | -1.1392071  |
| ZNF835  | zinc finger protein 835 [Source:HGNC Symbol;Acc:HGNC:34332]                                        | -1.1577439  |
| ZNF836  | zinc finger protein 836 [Source:HGNC Symbol;Acc:HGNC:34333]                                        | 1.0537889   |
| ZNF839  | zinc finger protein 839 [Source:HGNC Symbol;Acc:HGNC:20345]                                        | 1.0736257   |
| ZNF847P | zinc finger protein 847, pseudogene [Source:HGNC Symbol;Acc:HGNC:34384]                            | -1.1288737  |
| ZNFX1   | zinc finger NFX1-type containing 1 [Source:HGNC Symbol;Acc:HGNC:29271]                             | -1.55281055 |
| ZNHIT3  | zinc finger HIT-type containing 3 [Source:HGNC Symbol;Acc:HGNC:12309]                              | 1.1586044   |
| ZNRF1   | zinc and ring finger 1, E3 ubiquitin protein ligase [Source:HGNC Symbol;Acc:HGNC:18452]            | -1.2286729  |
| ZNRF2   | zinc and ring finger 2, E3 ubiquitin protein ligase [Source:HGNC Symbol;Acc:HGNC:22316]            | 1.0593784   |
| ZRANB1  | zinc finger RANBP2-type containing 1 [Source:HGNC Symbol;Acc:HGNC:18224]                           | 1.1078862   |
| ZRANB2  | zinc finger RANBP2-type containing 2 [Source:HGNC Symbol;Acc:HGNC:13058]                           | 1.5242678   |
| ZRSR2   | c finger CCCH-type, RNA binding motif and serine/arginine rich 2 [Source:HGNC Symbol;Acc:HGNC:230: | -1.1459846  |
| ZSCAN1  | zinc finger and SCAN domain containing 1 [Source:HGNC Symbol;Acc:HGNC:23712]                       | -1.1390978  |
| ZSCAN2  | zinc finger and SCAN domain containing 2 [Source:HGNC Symbol;Acc:HGNC:20994]                       | -1.1851785  |
| ZSCAN22 | zinc finger and SCAN domain containing 22 [Source:HGNC Symbol;Acc:HGNC:4929]                       | -1.1985495  |
| ZSCAN23 | zinc finger and SCAN domain containing 23 [Source:HGNC Symbol;Acc:HGNC:21193]                      | 1.0932422   |
| ZSCAN5A | zinc finger and SCAN domain containing 5A [Source:HGNC Symbol;Acc:HGNC:23710]                      | -1.1876063  |
| ZSCAN5D | zinc finger and SCAN domain containing 5D [Source:HGNC Symbol;Acc:HGNC:37706]                      | -1.0571538  |
| ZSWIM4  | zinc finger SWIM-type containing 4 [Source:HGNC Symbol;Acc:HGNC:25704]                             | -3.5101073  |
| ZSWIM6  | zinc finger SWIM-type containing 6 [Source:HGNC Symbol;Acc:HGNC:29316]                             | 1.5237813   |
| ZWINT   | ZW10 interacting kinetochore protein [Source:HGNC Symbol;Acc:HGNC:13195]                           | 1.0930071   |
| ZYG11A  | zyg-11 family member A, cell cycle regulator [Source:HGNC Symbol;Acc:HGNC:32058]                   | 1.0674232   |
| ZYG11B  | zyg-11 family member B, cell cycle regulator [Source:HGNC Symbol;Acc:HGNC:25820]                   | 1.3063971   |
| ZYX     | zyxin [Source:HGNC Symbol;Acc:HGNC:13200]                                                          | 1.231796    |

Supplemental table S3: Genes differentially expressed by mixture of flavanol metabolites

| Gene symbol | Gene name                                                                   | Fold-change |
|-------------|-----------------------------------------------------------------------------|-------------|
| PKIG        | protein kinase (cAMP-dependent, catalytic) inhibitor gamma                  | -1.2039772  |
| MEGF8       | multiple EGF-like-domains 8                                                 | -1.1590909  |
| TACC3       | transforming, acidic coiled-coil containing protein 3                       | -1.1565661  |
| MGAT1       | mannosyl (alpha-1,3-)-glycoprotein beta-1,2-N-acetylglucosaminyltransferase | -1.1540344  |
| EIF3C       | eukaryotic translation initiation factor 3, subunit C                       | -1.140174   |
| EXOC7       | exocyst complex component 7                                                 | -1.1356474  |
| WDR6        | WD repeat domain 6                                                          | -1.1273559  |
| HDGF        | hepatoma-derived growth factor                                              | -1.1193913  |
| TOX2        | TOX high mobility group box family member 2                                 | -1.114275   |
| EEF2        | eukaryotic translation elongation factor 2                                  | -1.1134382  |
| PTTG1IP     | pituitary tumor-transforming 1 interacting protein                          | -1.1110272  |
| KANSL3      | KAT8 regulatory NSL complex subunit 3                                       | -1.1076162  |
| TCF25       | transcription factor 25 (basic helix-loop-helix)                            | -1.107239   |
| TFE1        | transducin-like enhancer of split 1 (E(sp1) homolog, Drosophila)            | -1.106483   |
| CBX2        | chromobox homolog 2                                                         | -1.1029116  |
| COL27A1     | collagen, type XXVII, alpha 1                                               | -1.1007673  |
| VWCE        | von Willebrand factor C and EGF domains                                     | -1.0966772  |
| DBF4B       | DBF4 zinc finger B                                                          | -1.0953798  |
| CCR9        | chemokine (C-C motif) receptor 9                                            | -1.0949962  |
| ADAMTSL1    | ADAMTS-like 1                                                               | -1.0930561  |
| ST8SIA3     | ST8 alpha-N-acetyl-neuraminidase alpha-2,8-sialyltransferase 3              | -1.0924023  |
| HIP1        | huntingtin interacting protein 1                                            | -1.0882293  |
| PRMT1       | protein arginine methyltransferase 1                                        | -1.0881253  |
| PBDC1       | polysaccharide biosynthesis domain containing 1                             | -1.0875945  |
| SLC26A1     | solute carrier family 26 (anion exchanger), member 1                        | -1.0874616  |
| ADARB1      | adenosine deaminase, RNA-specific, B1                                       | -1.0856616  |
| AGO3        | argonaute 3, RISC catalytic component                                       | -1.085366   |
| NME2        | NME/NM23 nucleoside diphosphate kinase 2                                    | -1.0847706  |
| SNRPB       | small nuclear ribonucleoprotein polypeptides B and B1                       | -1.0840416  |
| COL26A1     | collagen type XXVI alpha 1 chain                                            | -1.0809991  |
| FDXR        | ferredoxin reductase                                                        | -1.0809367  |
| TUBA1C      | tubulin, alpha 1c                                                           | -1.0806866  |
| IP6K3       | inositol hexakisphosphate kinase 3                                          | -1.0805348  |
| NCAPD2      | non-SMC condensin I complex, subunit D2                                     | -1.0796225  |
| LRG_105     | serpin peptidase inhibitor, clade G (C1 inhibitor), member 1                | -1.079115   |
| GJB4        | gap junction protein, beta 4, 30.3kDa                                       | -1.078994   |
| RHOC        | ras homolog family member C                                                 | -1.07842    |
| ARHGAP27    | Rho GTPase activating protein 27                                            | -1.0766033  |
| BLK         | BLK proto-oncogene, Src family tyrosine kinase                              | -1.0765917  |
| FAM187B     | family with sequence similarity 187, member B                               | -1.0760257  |
| FAM150B     | family with sequence similarity 150, member B                               | -1.0758936  |
| HIRA        | histone cell cycle regulator                                                | -1.0755848  |
| HM13        | histocompatibility (minor) 13                                               | -1.0755416  |
| PIGL        | phosphatidylinositol glycan anchor biosynthesis, class L                    | -1.0751199  |
| CADM4       | cell adhesion molecule 4                                                    | -1.0731615  |
| PABPN1L     | poly(A) binding protein, nuclear 1-like (cytoplasmic)                       | -1.0730269  |
| CERK        | ceramide kinase                                                             | -1.072039   |
| DEFA4       | defensin, alpha 4, corticostatin                                            | -1.0709122  |
| CAPNS1      | calpain, small subunit 1                                                    | -1.0708506  |
| PHLPP2      | PH domain and leucine rich repeat protein phosphatase 2                     | -1.0708393  |
| GDPD4       | glycerophosphodiester phosphodiesterase domain containing 4                 | -1.0702958  |
| TMEM26      | transmembrane protein 26                                                    | -1.0695992  |
| RAPGEF3     | Rap guanine nucleotide exchange factor (GEF) 3                              | -1.0691727  |
| CEP250      | centrosomal protein 250kDa                                                  | -1.0681767  |
| TMEM44      | transmembrane protein 44                                                    | -1.06778215 |
| LRG_669     | protein kinase C, gamma                                                     | -1.0676694  |
| RGS4        | regulator of G-protein signaling 4                                          | -1.0674753  |
| MN1         | meningioma (disrupted in balanced translocation) 1                          | -1.0669563  |
| RTN3        | reticulon 3                                                                 | -1.0665742  |
| MMP25       | matrix metalloproteinase 25                                                 | -1.0661955  |
| DTHD1       | death domain containing 1                                                   | -1.0660564  |
| FAM71B      | family with sequence similarity 71, member B                                | -1.0654712  |
| CELSR2      | cadherin, EGF LAG seven-pass G-type receptor 2                              | -1.0653684  |
| EMG1        | EMG1 N1-specific pseudouridine methyltransferase                            | -1.065288   |
| TTC28       | tetratricopeptide repeat domain 28                                          | -1.0643384  |
| JAKMIP3     | Janus kinase and microtubule interacting protein 3                          | -1.0639915  |
| LOC254057   | uncharacterized LOC254057                                                   | -1.063947   |
| GDAP1L1     | ganglioside induced differentiation associated protein 1-like 1             | -1.0631312  |

|           |                                                                          |            |
|-----------|--------------------------------------------------------------------------|------------|
| T         | T, brachyury homolog                                                     | -1.0625863 |
| HMG20B    | high mobility group 20B                                                  | -1.0624989 |
| TMPRSS11B | transmembrane protease, serine 11B                                       | -1.0623791 |
| MTCH1     | mitochondrial carrier 1                                                  | -1.0619674 |
| LHX9      | LIM homeobox 9                                                           | -1.0619392 |
| PIDD1     | p53-induced death domain protein 1                                       | -1.0614755 |
| CBX6      | chromobox homolog 6                                                      | -1.0612999 |
| LOC647983 | uncharacterized LOC647983                                                | -1.0612423 |
| PPIL2     | peptidylprolyl isomerase (cyclophilin)-like 2                            | -1.0612197 |
| TLE4      | transducin-like enhancer of split 4                                      | -1.060471  |
| COLGALT1  | collagen beta(1-O)galactosyltransferase 1                                | -1.0604488 |
| PHLDB3    | pleckstrin homology-like domain, family B, member 3                      | -1.060153  |
| SYNDIG1   | synapse differentiation inducing 1                                       | -1.0595171 |
| OR56B1    | olfactory receptor, family 56, subfamily B, member 1                     | -1.0592353 |
| ZNF781    | zinc finger protein 781                                                  | -1.0592027 |
| FAM157A   | family with sequence similarity 157, member A                            | -1.0589517 |
| PHC2      | polyhomeotic homolog 2                                                   | -1.0589206 |
| PSAP      | prosaposin                                                               | -1.0588593 |
| LINC00028 | long intergenic non-protein coding RNA 28                                | -1.0588303 |
| FRS3      | fibroblast growth factor receptor substrate 3                            | -1.0587405 |
| CDC20B    | cell division cycle 20B                                                  | -1.0580913 |
| OLFM1     | olfactomedin 1                                                           | -1.0579987 |
| SORCS1    | sortilin-related VPS10 domain containing receptor 1                      | -1.0578002 |
| PPM1G     | protein phosphatase, Mg <sup>2+</sup> /Mn <sup>2+</sup> dependent, 1G    | -1.0577452 |
| C5AR2     | complement component 5a receptor 2                                       | -1.0574327 |
| REM1      | RAS (RAD and GEM)-like GTP-binding 1                                     | -1.0573826 |
| TMEM236   | transmembrane protein 236                                                | -1.0570358 |
| C3orf33   | chromosome 3 open reading frame 33                                       | -1.0569599 |
| C5orf56   | chromosome 5 open reading frame 56                                       | -1.0569204 |
| ARHGEF35  | Rho guanine nucleotide exchange factor (GEF) 35                          | -1.0566783 |
| EMX2OS    | EMX2 opposite strand/antisense RNA                                       | -1.056536  |
| EXOC3L4   | exocyst complex component 3-like 4                                       | -1.0563222 |
| GPR6      | G protein-coupled receptor 6                                             | -1.0563198 |
| DTX2P1    | DTX2 pseudogene 1                                                        | -1.0559713 |
| ZFR2      | zinc finger RNA binding protein 2                                        | -1.055905  |
| LGALS16   | lectin, galactoside-binding, soluble, 16                                 | -1.0553133 |
| P2RX1     | purinergic receptor P2X, ligand gated ion channel, 1                     | -1.0552719 |
| CDH5      | cadherin 5, type 2 (vascular endothelium)                                | -1.0550908 |
| HIPK2     | homeodomain interacting protein kinase 2                                 | -1.0549743 |
| MYBPC2    | myosin binding protein C, fast type                                      | -1.0549695 |
| NCAM1     | neural cell adhesion molecule 1                                          | -1.0546328 |
| PREX1     | phosphatidylinositol-3,4,5-trisphosphate-dependent Rac exchange factor 1 | -1.0545554 |
| SCARNA6   | small Cajal body-specific RNA 6                                          | -1.054547  |
| IL23R     | interleukin 23 receptor                                                  | -1.0544063 |
| GSTO1     | glutathione S-transferase omega 1                                        | -1.0542344 |
| ZDHHC14   | zinc finger, DHHC-type containing 14                                     | -1.053888  |
| OR51A7    | olfactory receptor, family 51, subfamily A, member 7                     | -1.0536222 |
| GLI2      | GLI family zinc finger 2                                                 | -1.053356  |
| NCR1      | natural cytotoxicity triggering receptor 1                               | -1.0533184 |
| MAP2      | microtubule-associated protein 2                                         | -1.0531723 |
| HOXD4     | homeobox D4                                                              | -1.0530685 |
| CDRT7     | CMT1A duplicated region transcript 7 (non-protein coding)                | -1.0529283 |
| SEMG2     | semenogelin II                                                           | -1.0528218 |
| PRKCG     | protein kinase C, gamma                                                  | -1.0528005 |
| AFF2      | AF4/FMR2 family, member 2                                                | -1.0527471 |
| FTCD      | formimidoyltransferase cyclodeaminase                                    | -1.0527433 |
| SERPING1  | serpin peptidase inhibitor, clade G (C1 inhibitor), member 1             | -1.0526729 |
| PSMD2     | proteasome (prosome, macropain) 26S subunit, non-ATPase, 2               | -1.0525974 |
| ZMIZ1-AS1 | ZMIZ1 antisense RNA 1                                                    | -1.0517846 |
| LENEP     | lens epithelial protein                                                  | -1.0517696 |
| PCNXL2    | pecanex-like 2 (Drosophila)                                              | -1.0517497 |
| NPHP3-AS1 | NPHP3 antisense RNA 1                                                    | -1.0516611 |
| MAGEB16   | melanoma antigen family B16                                              | -1.0516213 |
| OR2T10    | olfactory receptor, family 2, subfamily T, member 10                     | -1.0515475 |
| MORC2-AS1 | MORC2 antisense RNA 1                                                    | -1.0513216 |
| TRIQQ     | triple QxxK/R motif containing                                           | -1.0512347 |
| RBP7      | retinol binding protein 7, cellular                                      | -1.051118  |
| ZDHHC8    | zinc finger, DHHC-type containing 8                                      | -1.0511082 |
| ANKRD65   | ankyrin repeat domain 65                                                 | -1.0510427 |
| RASGRP3   | RAS guanyl releasing protein 3 (calcium and DAG-regulated)               | -1.0505981 |
| LOC728073 | uncharacterized LOC728073                                                | -1.0505474 |

|           |                                                                             |            |
|-----------|-----------------------------------------------------------------------------|------------|
| INF2      | inverted formin, FH2 and WH2 domain containing                              | -1.050537  |
| CNTFR-AS1 | CNTFR antisense RNA 1                                                       | -1.0504599 |
| RUFY1     | RUN and FYVE domain containing 1                                            | 1.0502021  |
| SOX10     | SRY (sex determining region Y)-box 10                                       | 1.0502113  |
| LMBR1     | limb development membrane protein 1                                         | 1.0503908  |
| AGTR1     | angiotensin II receptor, type 1                                             | 1.0504216  |
| LRG_47    | complement factor H                                                         | 1.0505482  |
| UBA5      | ubiquitin-like modifier activating enzyme 5                                 | 1.050722   |
| SELV      | selenoprotein V                                                             | 1.0509702  |
| L2HGDH    | L-2-hydroxyglutarate dehydrogenase                                          | 1.0511317  |
| SIAH2     | siah E3 ubiquitin protein ligase 2                                          | 1.0512342  |
| IGSF3     | immunoglobulin superfamily, member 3                                        | 1.0512369  |
| LRG_271   | SRY (sex determining region Y)-box 10                                       | 1.0512419  |
| SSX8      | synovial sarcoma, X breakpoint 8                                            | 1.0512534  |
| CLRN3     | clarin 3                                                                    | 1.0513512  |
| TMEM229B  | transmembrane protein 229B                                                  | 1.0515218  |
| TXNDC5    | thioredoxin domain containing 5 (endoplasmic reticulum)                     | 1.0516245  |
| LRP11     | low density lipoprotein receptor-related protein 11                         | 1.0524752  |
| AS3MT     | arsenite methyltransferase                                                  | 1.0525384  |
| CCDC43    | coiled-coil domain containing 43                                            | 1.052739   |
| FLJ22447  | uncharacterized LOC400221                                                   | 1.0529289  |
| SLC34A2   | solute carrier family 34 (type II sodium/phosphate cotransporter), member 2 | 1.0529337  |
| C3orf33   | chromosome 3 open reading frame 33                                          | 1.0529912  |
| AP1S2     | adaptor-related protein complex 1, sigma 2 subunit                          | 1.0530529  |
| PREX2     | phosphatidylinositol-3,4,5-trisphosphate-dependent Rac exchange factor 2    | 1.0540205  |
| OVGP1     | oviductal glycoprotein 1, 120kDa                                            | 1.0540551  |
| TP53AIP1  | tumor protein p53 regulated apoptosis inducing protein 1                    | 1.0542524  |
| ZEB2      | zinc finger E-box binding homeobox 2                                        | 1.0542524  |
| SLC44A1   | solute carrier family 44 (choline transporter), member 1                    | 1.0544792  |
| ZNF235    | zinc finger protein 235                                                     | 1.0547124  |
| GJC3      | gap junction protein, gamma 3, 30.2kDa                                      | 1.054886   |
| DIRAS1    | DIRAS family, GTP-binding RAS-like 1                                        | 1.0549461  |
| MATN3     | matrilin 3                                                                  | 1.0552053  |
| ADCY10    | adenylate cyclase 10 (soluble)                                              | 1.0560186  |
| ZMYND11   | zinc finger, MYND-type containing 11                                        | 1.0565411  |
| TRPC3     | transient receptor potential cation channel, subfamily C, member 3          | 1.0565642  |
| PTPRT     | protein tyrosine phosphatase, receptor type, T                              | 1.0569792  |
| OR2M2     | olfactory receptor, family 2, subfamily M, member 2                         | 1.0570612  |
| GRK4      | G protein-coupled receptor kinase 4                                         | 1.057197   |
| RXFP4     | relaxin/insulin-like family peptide receptor 4                              | 1.0578506  |
| LRG_754   | son of sevenless homolog 1                                                  | 1.0581787  |
| IQCG      | IQ motif containing G                                                       | 1.0596243  |
| CCDC170   | coiled-coil domain containing 170                                           | 1.0603614  |
| ADGRA1A   | adhesion G protein-coupled receptor A1                                      | 1.0605998  |
| ST7L      | suppression of tumorigenicity 7 like                                        | 1.0606669  |
| IKZF5     | IKAROS family zinc finger 5                                                 | 1.0610611  |
| LCN10     | lipocalin 10                                                                | 1.0628414  |
| INMT      | indolethylamine N-methyltransferase                                         | 1.0630426  |
| PLCD4     | phospholipase C, delta 4                                                    | 1.0641334  |
| CDON      | cell adhesion associated, oncogene regulated                                | 1.0641468  |
| PPP1R12B  | protein phosphatase 1, regulatory subunit 12B                               | 1.0644135  |
| APOL6     | apolipoprotein L, 6                                                         | 1.0648336  |
| SEC23B    | Sec23 homolog B (S. cerevisiae)                                             | 1.0651723  |
| EXOSC3    | exosome component 3                                                         | 1.0654143  |
| LOC257396 | uncharacterized LOC257396                                                   | 1.0658379  |
| FNBP1     | formin binding protein 1                                                    | 1.0667115  |
| MOB1A     | MOB kinase activator 1B                                                     | 1.0672476  |
| RRN3P2    | RNA polymerase I transcription factor homolog (S. cerevisiae) pseudogene 2  | 1.0685875  |
| SPDYE8P   | speedy/RINGO cell cycle regulator family member E8, pseudogene              | 1.0697902  |
| CDX1      | caudal type homeobox 1                                                      | 1.0699176  |
| GALK2     | galactokinase 2                                                             | 1.070527   |
| LINC00051 | long intergenic non-protein coding RNA 51                                   | 1.0709138  |
| OS9       | osteosarcoma amplified 9, endoplasmic reticulum lectin                      | 1.071141   |
| SLC35A1   | solute carrier family 35 (CMP-sialic acid transporter), member A1           | 1.0716475  |
| XBP1      | X-box binding protein 1                                                     | 1.0724787  |
| DEDD      | death effector domain containing                                            | 1.0731583  |
| KCNAB1    | potassium channel, voltage gated subfamily A regulatory beta subunit 1      | 1.073209   |
| ATG4C     | autophagy related 4C, cysteine peptidase                                    | 1.0734856  |
| GNRHR     | gonadotropin-releasing hormone receptor                                     | 1.0735542  |
| TNIP3     | TNFAIP3 interacting protein 3                                               | 1.074055   |
| TAB3      | TGF-beta activated kinase 1/MAP3K7 binding protein 3                        | 1.0742283  |

|            |                                                                                                |           |
|------------|------------------------------------------------------------------------------------------------|-----------|
| CTAGE1     | cutaneous T-cell lymphoma-associated antigen 1                                                 | 1.0762799 |
| ZNF701     | zinc finger protein 701                                                                        | 1.0768218 |
| INSIG2     | insulin induced gene 2                                                                         | 1.0777742 |
| CFH        | complement factor H                                                                            | 1.0777941 |
| PDE1C      | phosphodiesterase 1C, calmodulin-dependent 70kDa                                               | 1.0783639 |
| ZNF253     | zinc finger protein 253                                                                        | 1.0792263 |
| ABCC5      | ATP-binding cassette, sub-family C (CFTR/MRP), member 5                                        | 1.0793691 |
| PPY2P      | pancreatic polypeptide 2, pseudogene                                                           | 1.0809271 |
| THNSL1     | threonine synthase-like 1 (S. cerevisiae)                                                      | 1.0811859 |
| CCDC174    | coiled-coil domain containing 174                                                              | 1.0819297 |
| PLAU       | plasminogen activator, urokinase                                                               | 1.0830336 |
| CYB5R4     | cytochrome b5 reductase 4                                                                      | 1.0843542 |
| SNRNP48    | small nuclear ribonucleoprotein 48kDa (U11/U12)                                                | 1.0867411 |
| CD274      | CD274 molecule                                                                                 | 1.0878695 |
| DUS4L      | dihydrouridine synthase 4-like (S. cerevisiae)                                                 | 1.0881691 |
| RSU1       | Ras suppressor protein 1                                                                       | 1.0903277 |
| SGMS2      | sphingomyelin synthase 2                                                                       | 1.0916607 |
| ARHGAP42   | Rho GTPase activating protein 42                                                               | 1.0928626 |
| ZNF136     | zinc finger protein 136                                                                        | 1.0934138 |
| SOS1       | son of sevenless homolog 1 (Drosophila)                                                        | 1.0946532 |
| TLK1       | tousled-like kinase 1                                                                          | 1.0948888 |
| MLLT3      | myeloid/lymphoid or mixed-lineage leukemia                                                     | 1.0973772 |
| ZNF542     | zinc finger protein 542                                                                        | 1.0977765 |
| NEIL3      | nei endonuclease VIII-like 3                                                                   | 1.0986665 |
| LAMP3      | lysosomal-associated membrane protein 3                                                        | 1.100084  |
| NRBF2      | nuclear receptor binding factor 2                                                              | 1.1025711 |
| METTL3     | methyltransferase like 3                                                                       | 1.103495  |
| CTAGE4     | CTAGE family, member 4                                                                         | 1.1087644 |
| ATF2       | activating transcription factor 2                                                              | 1.1094769 |
| TMEM87B    | transmembrane protein 87B                                                                      | 1.1123282 |
| PAM        | peptidylglycine alpha-amidating monooxygenase                                                  | 1.1157597 |
| SRGAP2     | SLIT-ROBO Rho GTPase activating protein 2                                                      | 1.11683   |
| CLDN11     | claudin 11                                                                                     | 1.1180185 |
| CDKL1      | cyclin-dependent kinase-like 1 (CDC2-related kinase)                                           | 1.1208974 |
| C5orf56    | chromosome 5 open reading frame 56                                                             | 1.1229732 |
| ABHD3      | abhydrolase domain containing 3                                                                | 1.1268681 |
| CDKN2B-AS1 | CDKN2B antisense RNA 1                                                                         | 1.1276822 |
| CYP20A1    | cytochrome P450, family 20, subfamily A, polypeptide 1                                         | 1.1291639 |
| TMEM68     | transmembrane protein 68                                                                       | 1.1453892 |
| LAMC2      | laminin, gamma 2                                                                               | 1.1746995 |
| TUBE1      | tubulin, epsilon 1                                                                             | 1.1888752 |
| IFRD1      | interferon-related developmental regulator 1                                                   | 1.2011763 |
| HERPUD1    | homocysteine-inducible, endoplasmic reticulum stress-inducible, ubiquitin-like domain member 1 | 1.2108529 |

**Supplemental table S4:** The binding scores expressed in Glide docking Scores (kcal/mol) and Induced fit docking (IFD) scores between biotransformed variants of epicatechin in p38 MAPK active site (Pdb id: 4F9Y model)

| <b>Epicatechin metabolites</b>                                 | <b>Glide docking scores</b> | <b>Residues involved in H-bonding</b>                     |
|----------------------------------------------------------------|-----------------------------|-----------------------------------------------------------|
| 4'-O-methyl(-)-epicatechin-7- $\beta$ -D-glucuronide (4'MEC7G) | -10.242                     | Ser-32, Lys-53, His-107, Met-109, Ser-154, <b>Glu-178</b> |
| 3'-O-methyl(-)-epicatechin (3'MEC)                             | -7.246                      | Met-109, Ala-111, <b>Glu-178</b>                          |
| (-)-epicatechin-4'-sulfate (EC4'S)                             | -7.822                      | Gly-36, Lys-53, His-107, Met-109                          |

Supplemental table S5: Differentially expressed miRNA by TNF and by mixture of flavanol metabolites

| <b>TNF/control</b> |           | <b>Mix</b>     |            |
|--------------------|-----------|----------------|------------|
| <i>miRNA</i>       | <i>FC</i> | <i>miRNA</i>   | <i>FC</i>  |
| hsa-let-7f         | 1,0998023 | hsa-let-7a     | -1,0882393 |
| hsa-miR-1246       | 1,2011293 | hsa-let-7f     | -1,0843385 |
| hsa-miR-139-5p     | 1,1791074 | hsa-miR-10a    | -1,1383361 |
| hsa-miR-146a       | 2,0559123 | hsa-miR-10b    | -1,1306673 |
| hsa-miR-148a       | 1,5927936 | hsa-miR-1290   | -1,1568191 |
| hsa-miR-155        | 1,3901024 | hsa-miR-130b   | -1,0858847 |
| hsa-miR-195        | 1,2252228 | hsa-miR-134    | -1,2618986 |
| hsa-miR-199a-3p    | 1,3397902 | hsa-miR-181a*  | -1,177034  |
| hsa-miR-199a-5p    | 1,3601944 | hsa-miR-221*   | -1,1774971 |
| hsa-miR-214        | 1,2171185 | hsa-miR-224    | -1,1127338 |
| hsa-miR-221*       | 1,2703397 | hsa-miR-30a*   | -1,1222104 |
| hsa-miR-29b-1*     | 1,6904817 | hsa-miR-30c    | -1,1183422 |
| hsa-miR-369-5p     | 1,2240878 | hsa-miR-30e*   | -1,1639618 |
| hsa-miR-455-3p     | 1,2339121 | hsa-miR-320a   | -1,0500371 |
| hsa-miR-574-5p     | 1,1925792 | hsa-miR-320c   | -1,0795624 |
| hsa-miR-575        | 1,0906901 | hsa-miR-320d   | -1,0846931 |
| hsa-miR-584        | 1,2825359 | hsa-miR-361-5p | -1,1056353 |
| hsa-miR-638        | 1,1496371 | hsa-miR-365    | -1,1605713 |
| hsa-miR-98         | 1,1357678 | hsa-miR-543    | -1,1083959 |
|                    |           | hsa-miR-769-5p | 1,2960966  |

Supplemental table S6: Epigenetic effect of flavanol mixture

| Probe_ID   | MeanBeta_TN | MeanBeta_TNF+M | Delta_Beta    | P.Value  | UCSC_Ref_Single | UCSC_Ref_Gene_Name                                             | UCSC_RefGene_Accession                                        | UCSC_RefGene_Group                      | Relation_to_UCSC_CpG_Island |
|------------|-------------|----------------|---------------|----------|-----------------|----------------------------------------------------------------|---------------------------------------------------------------|-----------------------------------------|-----------------------------|
| cg2387845  | 0.9438847   | 0.773139183    | -0.170715517  | 2.03E-07 | GOLGA8          | GOLGA8                                                         | NR_027409                                                     | Body                                    |                             |
| cg0333020  | 0.968259319 | 0.846259319    | -0.12207795   | 3.38E-07 | EPC1            | EPC1                                                           | NR_002929                                                     | Body                                    |                             |
| cg10685961 | 0.927738469 | 0.765691393    | -0.162047076  | 7.70E-07 | EPC1            | EPC1                                                           | NR_002509                                                     | 3UTR                                    | S_Shelf                     |
| cg15047610 | 0.092728026 | 0.253693661    | 0.158415635   | 7.96E-07 |                 |                                                                |                                                               |                                         |                             |
| cg22045055 | 0.946624257 | 0.83534257     | -0.111332427  | 8.47E-07 |                 |                                                                |                                                               |                                         |                             |
| cg07741992 | 0.967675467 | 0.826701822    | -0.140973645  | 9.83E-07 | MPZL1           | MPZL1,MPZL1,MPZL1                                              | NM_001146191;NM_003953;NM_024569                              | Body;Body;Body                          |                             |
| cg12797711 | 0.933620565 | 0.780730575    | -0.15288999   | 1.01E-06 | NME7            | NME7,NME7                                                      | NM_013330;NM_197972                                           | Body;Body                               |                             |
| cg23441030 | 0.946399141 | 0.755399141    | -0.191395251  | 1.06E-06 | RABGAP1L        | RABGAP1,RABGAP1L                                               | NM_00103233;NM_0014857                                        | Body;Body                               |                             |
| cg09096169 | 0.933007617 | 0.783423603    | -0.154584015  | 1.89E-06 | AP2A2           | AP2A2                                                          | NM_012305                                                     | Body                                    | N_Shore                     |
| cg01861402 | 0.958245062 | 0.819079834    | -0.139165228  | 2.07E-06 |                 |                                                                |                                                               |                                         |                             |
| cg18417772 | 0.951160266 | 0.814206166    | -0.1369546    | 2.47E-06 |                 |                                                                |                                                               |                                         |                             |
| cg07707687 | 0.974573953 | 0.844545487    | -0.130928466  | 2.77E-06 |                 |                                                                |                                                               |                                         | N_Shore                     |
| cg26489875 | 0.047387156 | 0.169427132    | 0.122084975   | 3.10E-06 | MALAT1          | MALAT1                                                         | NR_002819                                                     | Body                                    |                             |
| cg15031299 | 0.953664817 | 0.822356334    | -0.131328483  | 3.15E-06 | NOTCH4          | NOTCH4                                                         | NM_004552                                                     | Body                                    |                             |
| cg24528904 | 0.072320662 | 0.209364515    | 0.136133852   | 3.74E-06 | PICALM          | PICALM,PICALM                                                  | NM_00100866;NM_007166                                         | Body;Body                               | N_Shore                     |
| cg14299369 | 0.952908973 | 0.812634576    | -0.140274397  | 3.75E-06 | TGM5            | TGM5,TGM5                                                      | NM_004245;NM_021631                                           | TS1500;TS1500                           |                             |
| cg01145686 | 0.823565334 | 0.921168349    | 0.097612155   | 4.14E-06 | FGFR2           | FGFR2,FGFR2,FGFR2,FGFR2,FGFR2,FGFR2,FGFR2,FGFR2                | NM_001144914;NM_001144915;NM_022970;NM_001144913;NM_001144912 | Body;Body;Body;Body;Body;Body;Body;Body | N_Shore                     |
| cg15388550 | 0.904693849 | 0.748331815    | -0.156352024  | 4.48E-06 | MGMR            | MGMR                                                           |                                                               |                                         |                             |
| cg11918049 | 0.946600988 | 0.839472488    | -0.1071285    | 4.59E-06 | MAP4K4          | MAP4K4,MAP4K4,MAP4K4                                           | NM_145687;NM_004834;NM_145686                                 | Body;Body;Body                          |                             |
| cg24121906 | 0.952801963 | 0.845371973    | -0.107429991  | 4.69E-06 | SLC35F1         | SLC35F1                                                        | NM_001029585                                                  | Body                                    |                             |
| cg18484878 | 0.935448127 | 0.819332877    | -0.116115941  | 4.76E-06 | PF21A           | PF21A,PF21A                                                    | NM_016621;NM_001101802                                        | Body;Body                               |                             |
| cg04987857 | 0.882089516 | 0.730077894    | -0.152011622  | 5.67E-06 | FRS2            | FRS2,FRS2                                                      | NM_006654;NM_01042555                                         | TS1500;TS1500                           |                             |
| cg19329294 | 0.937381057 | 0.821778549    | -0.115602508  | 5.87E-06 | IQCH            | IQCH,IQCH                                                      | NM_00103171;NM_001027784                                      | Body;Body                               |                             |
| cg16426510 | 0.932981513 | 0.777001355    | -0.155940157  | 6.25E-06 | PRF1A           | PRF1A,PRF1A                                                    | NM_001045125;NM_013446                                        | Body;Body                               |                             |
| cg20631969 | 0.03373974  | 0.14753296     | 0.114158985   | 6.45E-06 | MKRN1           | MKRN1,MKRN1                                                    | NM_000527                                                     | Body                                    | N_Shelf                     |
| cg10115321 | 0.906684935 | 0.788924457    | -0.117759937  | 1.11E-05 | CSNK2B          | CSNK2B                                                         | NR_001320                                                     | Body                                    | S_Shore                     |
| cg12819873 | 0.800569114 | 0.62869214     | -0.1718768    | 1.11E-05 | PKCZ            | PKCZ                                                           | NM_000429                                                     | Body                                    |                             |
| cg02186748 | 0.792179854 | 0.912450485    | 0.120270613   | 1.22E-05 | COL1A1          | COL1A1                                                         | NM_000088                                                     | TS1500                                  | S_Shore                     |
| cg16851127 | 0.925989746 | 0.683497393    | -0.242532353  | 1.22E-05 | RNF19A          | RNF19A,RNF19A                                                  | NM_015435;NM_183419                                           | TS1500;SUTR                             |                             |
| cg16174678 | 0.967091781 | 0.819011187    | -0.1480806    | 1.26E-05 |                 |                                                                |                                                               |                                         | Island                      |
| cg11361658 | 0.903909124 | 0.747699113    | -0.156210011  | 1.27E-05 |                 |                                                                |                                                               |                                         |                             |
| cg16244394 | 0.932812565 | 0.750490406    | -0.182318519  | 1.28E-05 | CDC42SE2        | CDC42SE2,CDC42SE2                                              | NM_00103870;NM_020240                                         | Body;Body                               |                             |
| cg05091929 | 0.932315087 | 0.821065554    | -0.111989747  | 1.32E-05 | ERCC2           | ERCC2                                                          | NR_001576                                                     | Body                                    |                             |
| cg14574951 | 0.097124624 | 0.216814796    | 0.119690172   | 1.42E-05 | PW1             | PW1                                                            | NM_0004764                                                    | Body                                    | S_Shelf                     |
| cg14887500 | 0.896707877 | 0.756806991    | -0.139900885  | 1.62E-05 | ERCC1           | ERCC1                                                          | NR_001576                                                     | Body                                    |                             |
| cg15170640 | 0.743314907 | 0.87433789     | 0.131025191   | 1.65E-05 |                 |                                                                |                                                               |                                         |                             |
| cg15226336 | 0.100282712 | 0.234546573    | 0.134263861   | 1.73E-05 | RASSF1          | RASSF1,RASSF1,RASSF1,RASSF1                                    | NM_170713;NM_170714;NM_007182;NM_170712                       | TS2500;Body;Body;SUTR                   | Island                      |
| cg27027668 | 0.867127994 | 0.706892168    | -0.157098826  | 1.75E-05 | C16orf45        | C16orf45                                                       | NM_033201                                                     | Body                                    |                             |
| cg04495887 | 0.96155668  | 0.849155668    | -0.112401117  | 1.77E-05 |                 |                                                                |                                                               |                                         |                             |
| cg09052626 | 0.103324094 | 0.278491297    | 0.175167203   | 1.96E-05 |                 |                                                                |                                                               |                                         |                             |
| cg19561453 | 0.943028837 | 0.715075044    | -0.227953793  | 1.98E-05 | HSF2            | HSF2,HSF2                                                      | NM_001135564;NM_004506                                        | Body;Body                               |                             |
| cg24672610 | 0.861699002 | 0.700469002    | -0.161493982  | 1.98E-05 | PFKP            | PFKP                                                           | NM_000262                                                     | Body                                    | N_Shelf                     |
| cg01766943 | 0.759148065 | 0.86671778     | 0.107569715   | 1.99E-05 | SPTN1           | SPTN1,SPTN1                                                    | NM_178313;NM_003128                                           | Body;Body                               | N_Shore                     |
| cg13088660 | 0.944501982 | 0.818091762    | -0.12641022   | 2.04E-05 | SPTN1           | SPTN1                                                          | NM_003128                                                     | 3UTR                                    |                             |
| cg00036999 | 0.900743661 | 0.656820422    | -0.243923239  | 2.04E-05 | PTPN14          | PTPN14                                                         | NM_005401                                                     | Body                                    |                             |
| cg10316056 | 0.963870596 | 0.854115577    | -0.109755019  | 2.07E-05 |                 |                                                                |                                                               |                                         |                             |
| cg18468725 | 0.940170355 | 0.783958571    | -0.1563184964 | 2.12E-05 | ZSCAN1B         | ZSCAN1B;ZSCAN1B;ZSCAN1B;ZSCAN1B                                | NM_001145544;NM_001145542;NM_001145543;NM_023926              | TS1500;Body;TS1500;TS1500               | Island                      |
| cg15498379 | 0.801294981 | 0.620645091    | -0.18064989   | 2.12E-05 | ABO             | ABO                                                            | NM_002469                                                     | Body                                    | S_Shore                     |
| cg14632621 | 0.770123812 | 0.893935188    | 0.123811376   | 2.21E-05 | CAACNA1C        | CAACNA1C;CAACNA1C;CAACNA1C;CAACNA1C;CAACNA1C;CAACNA1C;CAACNA1C | NM_001129844;NM_001129827;NM_001129839;NM_00112983            | Body;Body;Body;Body;Body;Body;Body      |                             |
| cg09890339 | 0.960574478 | 0.910669086    | -0.04987306   | 2.26E-05 |                 |                                                                |                                                               |                                         |                             |
| cg20644539 | 0.781259822 | 0.649135668    | -0.132124154  | 2.32E-05 | TRM2            | TRM2                                                           | NM_015271;NM_001130067                                        | 3UTR;SUTR                               |                             |
| cg03724962 | 0.952536229 | 0.84427022     | -0.108683408  | 2.39E-05 | CD6C            | CD6C                                                           | NM_0011254                                                    | Body                                    |                             |
| cg09657431 | 0.941911027 | 0.778327736    | -0.163583291  | 2.50E-05 | CD6C            | CD6C                                                           | NM_001094                                                     | Body                                    | S_Shelf                     |
| cg24672610 | 0.861699002 | 0.700469002    | -0.161493982  | 2.50E-05 | EHM2            | EHM2,EHM2                                                      | NM_000299;NM_025256                                           | Body;Body                               |                             |
| cg01766943 | 0.759148065 | 0.86671778     | 0.107569715   | 2.50E-05 | SPTN1           | SPTN1,SPTN1                                                    | NM_178313;NM_003128                                           | Body;Body                               | N_Shore                     |
| cg13088660 | 0.944501982 | 0.818091762    | -0.12641022   | 2.50E-05 | SPTN1           | SPTN1                                                          | NM_003128                                                     | 3UTR                                    |                             |
| cg00036999 | 0.900743661 | 0.656820422    | -0.243923239  | 2.50E-05 | PTPN14          | PTPN14                                                         | NM_005401                                                     | Body                                    |                             |
| cg10316056 | 0.963870596 | 0.854115577    | -0.109755019  | 2.07E-05 |                 |                                                                |                                                               |                                         |                             |
| cg18468725 | 0.940170355 | 0.783958571    | -0.1563184964 | 2.12E-05 |                 |                                                                |                                                               |                                         |                             |
| cg15498379 | 0.801294981 | 0.620645091    | -0.18064989   | 2.12E-05 |                 |                                                                |                                                               |                                         |                             |
| cg14632621 | 0.770123812 | 0.893935188    | 0.123811376   | 2.21E-05 |                 |                                                                |                                                               |                                         |                             |
| cg09890339 | 0.960574478 | 0.910669086    | -0.04987306   | 2.26E-05 |                 |                                                                |                                                               |                                         |                             |
| cg20644539 | 0.781259822 | 0.649135668    | -0.132124154  | 2.32E-05 |                 |                                                                |                                                               |                                         |                             |
| cg03724962 | 0.952536229 | 0.84427022     | -0.108683408  | 2.39E-05 |                 |                                                                |                                                               |                                         |                             |
| cg09657431 | 0.941911027 | 0.778327736    | -0.163583291  | 2.50E-05 |                 |                                                                |                                                               |                                         |                             |
| cg24672610 | 0.861699002 | 0.700469002    | -0.161493982  | 2.50E-05 |                 |                                                                |                                                               |                                         |                             |
| cg01766943 | 0.759148065 | 0.86671778     | 0.107569715   | 2.50E-05 |                 |                                                                |                                                               |                                         |                             |
| cg13088660 | 0.944501982 | 0.818091762    | -0.12641022   | 2.50E-05 |                 |                                                                |                                                               |                                         |                             |
| cg00036999 | 0.900743661 | 0.656820422    | -0.243923239  | 2.50E-05 |                 |                                                                |                                                               |                                         |                             |
| cg10316056 | 0.963870596 | 0.854115577    | -0.109755019  | 2.07E-05 |                 |                                                                |                                                               |                                         |                             |
| cg18468725 | 0.940170355 | 0.783958571    | -0.1563184964 | 2.12E-05 |                 |                                                                |                                                               |                                         |                             |
| cg15498379 | 0.801294981 | 0.620645091    | -0.18064989   | 2.12E-05 |                 |                                                                |                                                               |                                         |                             |
| cg14632621 | 0.770123812 | 0.893935188    | 0.123811376   | 2.21E-05 |                 |                                                                |                                                               |                                         |                             |
| cg09890339 | 0.960574478 | 0.910669086    | -0.04987306   | 2.26E-05 |                 |                                                                |                                                               |                                         |                             |
| cg20644539 | 0.781259822 | 0.649135668    | -0.132124154  | 2.32E-05 |                 |                                                                |                                                               |                                         |                             |
| cg03724962 | 0.952536229 | 0.84427022     | -0.108683408  | 2.39E-05 |                 |                                                                |                                                               |                                         |                             |
| cg09657431 | 0.941911027 | 0.778327736    | -0.163583291  | 2.50E-05 |                 |                                                                |                                                               |                                         |                             |
| cg24672610 | 0.861699002 | 0.700469002    | -0.161493982  | 2.50E-05 |                 |                                                                |                                                               |                                         |                             |
| cg01766943 | 0.759148065 | 0.86671778     | 0.107569715   | 2.50E-05 |                 |                                                                |                                                               |                                         |                             |
| cg13088660 | 0.944501982 | 0.818091762    | -0.12641022   | 2.50E-05 |                 |                                                                |                                                               |                                         |                             |
| cg00036999 | 0.900743661 | 0.656820422    | -0.243923239  | 2.50E-05 |                 |                                                                |                                                               |                                         |                             |
| cg10316056 | 0.963870596 | 0.854115577    | -0.109755019  | 2.07E-05 |                 |                                                                |                                                               |                                         |                             |
| cg18468725 | 0.940170355 | 0.783958571    | -0.1563184964 | 2.12E-05 |                 |                                                                |                                                               |                                         |                             |
| cg15498379 | 0.801294981 | 0.620645091    | -0.18064989   | 2.12E-05 |                 |                                                                |                                                               |                                         |                             |
| cg14632621 | 0.770123812 | 0.893935188    | 0.123811376   | 2.21E-05 |                 |                                                                |                                                               |                                         |                             |
| cg09890339 | 0.960574478 | 0.910669086    | -0.04987306   | 2.26E-05 |                 |                                                                |                                                               |                                         |                             |
| cg20644539 | 0.781259822 | 0.649135668    | -0.132124154  | 2.32E-05 |                 |                                                                |                                                               |                                         |                             |
| cg03724962 | 0.952536229 | 0.84427022     | -0.108683408  | 2.39E-05 |                 |                                                                |                                                               |                                         |                             |
| cg09657431 | 0.941911027 | 0.778327736    | -0.163583291  | 2.50E-05 |                 |                                                                |                                                               |                                         |                             |
| cg24672610 | 0.861699002 | 0.700469002    | -0.161493982  | 2.50E-05 |                 |                                                                |                                                               |                                         |                             |
| cg01766943 | 0.759148065 | 0.86671778     | 0.107569715   | 2.50E-05 |                 |                                                                |                                                               |                                         |                             |
| cg13088660 | 0.944501982 | 0.818091762    | -0.12641022   | 2.50E-05 |                 |                                                                |                                                               |                                         |                             |
| cg00036999 | 0.900743661 | 0.656820422    | -0.243923239  | 2.50E-05 |                 |                                                                |                                                               |                                         |                             |
| cg10316056 | 0.963870596 | 0.854115577    | -0.109755019  | 2.07E-05 |                 |                                                                |                                                               |                                         |                             |
| cg18468725 | 0.940170355 | 0.783958571    | -0.1563184964 | 2.12E-05 |                 |                                                                |                                                               |                                         |                             |





|            |             |             |              |             |             |                                  |                                                |                           |         |
|------------|-------------|-------------|--------------|-------------|-------------|----------------------------------|------------------------------------------------|---------------------------|---------|
| cg13539397 | 0.748953148 | 0.517519468 | -0.23143368  | 0.000350459 | RADS1L1     | RADS1L1;RADS1L1;RADS1L1          | NM_133509NM_002877NM_133510                    | Body;Body;Body            | N_Shelf |
| cg25496153 | 0.82209795  | 0.68070575  | -0.15808193  | 0.00053675  | C3orf31     |                                  | NM_138891                                      | Body                      | N_Shelf |
| cg24212438 | 0.164470004 | 0.254882271 | 0.108512267  | 0.000351746 | AGAP1       | AGAP1;AGAP1                      | NM_014914NM_00103711                           | Body;Body                 | N_Shelf |
| cg19168192 | 0.693421038 | 0.818924276 | 0.125514518  | 0.000394977 | GPX5        | GPX5;GPX5                        | NM_003996NM_001509                             | Body;Body                 | N_Shelf |
| cg07298482 | 0.91470005  | 0.84562222  | -0.14356232  | 0.000355493 | SUNC1       | SUNC1;SUNC1                      | NM_152782NM_001030019                          | TSS200;TSS200             | N_Shelf |
| cg04806571 | 0.665515587 | 0.774673008 | 0.109157421  | 0.00035621  | LLR8A       | LLR8A;LLR8A                      | NM_006847NM_001081438                          | TSS1500;TSS1500           | Island  |
| cg15404544 | 0.071847293 | 0.147363215 | 0.10382715   | 0.000356726 | ER2         | ER2;TSTX10                       | NM_004907NM_0003765                            | SUTR;TSS1500              | N_Shelf |
| cg13784878 | 0.943524989 | 0.975682483 | -0.147842506 | 0.000358019 | PHACTR4     | PHACTR4                          | NM_001041813                                   | SUTR                      | N_Shelf |
| cg01569875 | 0.761022821 | 0.867786314 | 0.106763494  | 0.000359293 | SYT17       | SYT17                            | NM_0116524                                     | Body                      | N_Shelf |
| cg24621858 | 0.75074462  | 0.85227446  | 0.000359425  | 0.000359425 | BLCL1L14    | BLCL1L14;BLCL1L14;BLCL1L14       | NM_138273NM_001139723NM_138273                 | SUTR;TSS1500              | N_Shelf |
| cg21171115 | 0.128135025 | 0.255093938 | 0.127074313  | 0.000362218 | KAP2        | KAP2;PALM2;KAP2;PALM2;KAP2;KAP2  | NM_00104065NM_137150NM_007203NM_00136562       | Body;Body;Body;SUTR       | N_Shelf |
| cg12058189 | 0.161972305 | 0.371307121 | 0.209334816  | 0.000362947 |             |                                  |                                                |                           | N_Shelf |
| cg15689180 | 0.87403782  | 0.87403782  | -0.1303222   | 0.000365046 |             |                                  |                                                |                           | N_Shelf |
| cg26360197 | 0.750237986 | 0.869021325 | 0.105783337  | 0.000366225 | RPTOR       | RPTOR;RPTOR                      | NM_001163034NM_020761                          | Body;Body                 | N_Shelf |
| cg15202609 | 0.800247067 | 0.638534421 | -0.161712646 | 0.000366654 | ABCC4       | ABCC4;ABCC4                      | NM_001142505NM_022169                          | TSS1500;SUTR              | N_Shelf |
| cg22138302 | 0.660350976 | 0.772468173 | 0.112117197  | 0.000367729 | MYOT        | MYOT;MYOT;MYOT;MYOT              | NM_006790NM_006790NM_01135940NM_01135940       | 1stExon;SUTR;1stExon;SUTR | N_Shelf |
| cg04963362 | 0.537590722 | 0.6953517   | -0.139255462 | 0.000370063 | MEI1        | MEI1                             | NM_002398                                      | Body                      | N_Shelf |
| cg18604354 | 0.103261916 | 0.214913692 | 0.111651775  | 0.000370399 | TMEM100     | TMEM100;TMEM100                  | NM_0182826NM_001099640                         | TSS1500;SUTR              | N_Shelf |
| cg22278087 | 0.253907273 | 0.175144692 | -0.150632255 | 0.000373739 | C1orf45     | C1orf45                          | NM_032933                                      | Body                      | N_Shelf |
| cg15283212 | 0.915458386 | 0.76482613  | -0.171468736 | 0.000374745 | NEBL        | NEBL                             | NM_213569                                      | Body                      | N_Shelf |
| cg00645742 | 0.857986134 | 0.666517398 | -0.176469397 | 0.000375919 | SYNPR       | SYNPR;SYNPR                      | NM_144642NM_001130003                          | Body;Body                 | N_Shelf |
| cg25664319 | 0.93235432  | 0.808254932 | -0.1240705   | 0.000376118 | STAG2       | STAG2;STAG2;STAG2;STAG2;STAG2    | NM_001042749NM_001042751NM_001042749NM_006603N | 1stExon;TSS1500;SUTR;TSS  | N_Shelf |
| cg01518188 | 0.316715827 | 0.441540968 | 0.24825142   | 0.000377185 | RN2         | RN2                              | NM_001042749NM_001042751NM_001042749NM_006603N | 1stExon;TSS1500;SUTR;TSS  | N_Shelf |
| cg16255729 | 0.78397311  | 0.589295537 | -0.19467553  | 0.000378771 | SLAMF6      | SLAMF6                           | NM_052931                                      | Body                      | N_Shelf |
| cg24119500 | 0.728017471 | 0.847794717 | 0.191872425  | 0.000379357 | BA3         | BA3                              | NM_00117074                                    | Body                      | N_Shelf |
| cg24399951 | 0.07110886  | 0.19010886  | 0.11814945   | 0.000379891 | DYRK3       | DYRK3;DYRK3                      | NM_00100402NM_003582                           | TSS1500;TSS1500           | N_Shelf |
| cg13226861 | 0.811310053 | 0.811310053 | -0.103685587 | 0.00038034  | SUCLA2      | SUCLA2                           | NM_003850                                      | Body                      | N_Shelf |
| cg17533142 | 0.935456033 | 0.745566272 | -0.18988976  | 0.000380762 | TC7C8       | TC7C8                            | NM_00101084                                    | Body                      | N_Shelf |
| cg10308950 | 0.818186927 | 0.62808987  | -0.19132729  | 0.00038115  | GRIN        | GRIN;GRIN                        | NM_00102086NM_01024218                         | TSS1500;TSS1500           | N_Shelf |
| cg15824062 | 0.947848791 | 0.818676493 | -0.129172298 | 0.000381591 | GRIN        | GRIN;GRIN                        |                                                |                           | N_Shelf |
| cg15744108 | 0.941056084 | 0.831167445 | -0.10988864  | 0.000382408 | DPF6        | DPF6                             |                                                |                           | N_Shelf |
| cg16147794 | 0.95236126  | 0.83550823  | -0.14916928  | 0.000383178 | DPF6        | DPF6                             |                                                |                           | N_Shelf |
| cg19565425 | 0.891653476 | 0.764645526 | -0.12700795  | 0.000385558 |             |                                  |                                                |                           | N_Shelf |
| cg18173184 | 0.152820027 | 0.267144158 | 0.1434215    | 0.00038846  | WWOX        | WWOX                             | NM_024949                                      | Body                      | N_Shelf |
| cg01191157 | 0.77452207  | 0.808466356 | 0.123941329  | 0.000388641 | WWC2        | WWC2                             | NM_198464                                      | Body                      | N_Shelf |
| cg07855449 | 0.956729482 | 0.848265437 | -0.10846404  | 0.000390135 | T-SPI       | T-SPI                            | NM_198464                                      | Body                      | N_Shelf |
| cg03145322 | 0.702798512 | 0.805310672 | 0.102512159  | 0.000390169 | ACTN1       | ACTN1;ACTN1;ACTN1                | NM_001130004NM_00110224NM_001130005            | Body;Body;Body            | N_Shelf |
| cg02542710 | 0.862282475 | 0.71371456  | -0.14827519  | 0.000391172 | HLA-E       | HLA-E                            | NM_005516                                      | Body                      | N_Shelf |
| cg21297314 | 0.974970882 | 0.856052584 | -0.118918299 | 0.000394132 | WWOX        | WWOX                             | NM_016373                                      | Body                      | N_Shelf |
| cg04600055 | 0.120999756 | 0.237489622 | 0.116489896  | 0.000397585 | WWOX        | WWOX                             |                                                |                           | N_Shelf |
| cg26700469 | 0.866566943 | 0.740111943 | -0.1264957   | 0.000398271 | WWOX        | WWOX                             |                                                |                           | N_Shelf |
| cg01183860 | 0.909795639 | 0.77253355  | -0.13254284  | 0.000398332 |             |                                  |                                                |                           | N_Shelf |
| cg06836933 | 0.773632923 | 0.877468616 | 0.103890393  | 0.000398701 | NLK         | NLK                              | NM_0116231                                     | TSS200                    | N_Shelf |
| cg02668694 | 0.108394301 | 0.248282475 | 0.139755397  | 0.000399172 | NSMAF       | NSMAF;NSMAF                      | NM_003580NM_001144772                          | Body;Body                 | N_Shelf |
| cg25874872 | 0.703408813 | 0.81166365  | 0.108256838  | 0.000400528 | USP28       | USP28                            | NM_020886                                      | Body                      | N_Shelf |
| cg13604623 | 0.835830584 | 0.184873195 | 0.126522191  | 0.000400689 | CD44        | CD44;CD44;CD44;CD44;CD44         | NM_001001389NM_00101390NM_000610NM_00101391N   | 3UTR;3UTR;3UTR;3UTR       | N_Shelf |
| cg14991562 | 0.94393628  | 0.670061974 | -0.164514622 | 0.000402085 | SCARN3L     | SCARN3L                          | NM_023358NM_001412                             | TSS200;Body               | N_Shelf |
| cg04999227 | 0.054576596 | 0.760695154 | -0.10910586  | 0.000403155 | TSFM        | TSFM                             | NM_025782                                      | Body                      | N_Shelf |
| cg15399342 | 0.95860016  | 0.84764943  | -0.10910586  | 0.000403155 | TSFM        | TSFM                             | NM_025782                                      | Body                      | N_Shelf |
| cg00774300 | 0.93263129  | 0.83550823  | -0.175764523 | 0.000404734 | TPSNA8      | TPSNA8                           | NM_004616                                      | Body                      | N_Shelf |
| cg13530552 | 0.89981887  | 0.722309119 | -0.176672268 | 0.000404734 |             |                                  |                                                |                           | N_Shelf |
| cg03890198 | 0.941700341 | 0.835400116 | -0.106300226 | 0.000406075 | PSMD7       | PSMD7                            | NM_002811                                      | Body                      | N_Shelf |
| cg02543101 | 0.933080809 | 0.789651179 | -0.1434347   | 0.000406631 | PSMD7       | PSMD7                            |                                                |                           | N_Shelf |
| cg02030661 | 0.892193794 | 0.718238061 | -0.173955732 | 0.00040726  | CDKAL1      | CDKAL1                           | NM_0117774                                     | TSS200                    | N_Shelf |
| cg07564108 | 0.110215961 | 0.222519025 | 0.112303065  | 0.000408666 | RNASENKASEN | RNASENKASEN                      | NM_013235NM_001100412                          | TSS200                    | N_Shelf |
| cg18303947 | 0.87089878  | 0.728017471 | -0.13969551  | 0.000409544 | ID3         | ID3                              | NM_002167                                      | Body                      | N_Shelf |
| cg02485144 | 0.16041675  | 0.285735088 | 0.25318338   | 0.0004091   | ZNF509      | ZNF509                           | NM_145291                                      | Body                      | N_Shelf |
| cg10735211 | 0.62672034  | 0.757142058 | 0.130421718  | 0.000409288 | DLG4        | DLG4;DLG4                        | NM_001365NM_001128827                          | Body;Body                 | N_Shelf |
| cg17107626 | 0.936843114 | 0.816948135 | -0.113906179 | 0.000409544 | DLG4        | DLG4;DLG4                        | NM_001365NM_001128827                          | Body;Body                 | N_Shelf |
| cg0515217  | 0.90635467  | 0.6953517   | -0.10928494  | 0.000412113 | USP7        | USP7                             | NM_177602                                      | TSS200;SUTR               | N_Shelf |
| cg03547797 | 0.695724584 | 0.809967007 | 0.114242423  | 0.000412484 | GAS2        | GAS2;GAS2                        | NM_177553NM_001148380                          | TSS200;SUTR               | N_Shelf |
| cg06867786 | 0.723929914 | 0.831321807 | 0.107391894  | 0.00041239  | USP7        | USP7                             | NM_003470                                      | Body                      | N_Shelf |
| cg25496365 | 0.823130583 | 0.44842385  | -0.17834121  | 0.000414218 | HMBX1       | HMBX1;HMBX1                      | NM_001135726NM_024567                          | SUTR;SUTR                 | N_Shelf |
| cg16799737 | 0.109727123 | 0.220082482 | 0.112120309  | 0.000415553 | TRM5        | TRM5                             | NM_173088                                      | Body                      | N_Shelf |
| cg02095937 | 0.067622416 | 0.167665551 | 0.124935335  | 0.000415616 | UBE2H       | UBE2H;UBE2H                      | NM_003344NM_182697                             | Body;Body                 | N_Shelf |
| cg02007664 | 0.154261493 | 0.309871493 | 0.309871493  | 0.000416507 | ASRL1       | ASRL1;ASRL1                      | NM_001083926NM_025080                          | Body;Body                 | N_Shelf |
| cg08626382 | 0.930244111 | 0.806979249 | -0.123265162 | 0.000418554 | LKMTA       | LKMTA                            | NM_177398                                      | Body                      | N_Shelf |
| cg16524049 | 0.949308783 | 0.429642212 | 0.180334449  | 0.00041887  | RAS3B       | RAS3B                            | NM_001037954                                   | Body                      | N_Shelf |
| cg19992375 | 0.921193487 | 0.8706017   | -0.1870601   | 0.000420271 | NAA11       | NAA11                            | NM_032693                                      | TSS1500                   | N_Shelf |
| cg20073882 | 0.916284588 | 0.809311628 | -0.106972959 | 0.000422669 | DDX1        | DDX1                             | NM_001037954                                   | Body                      | N_Shelf |
| cg11471799 | 0.961854546 | 0.819205359 | -0.293750939 | 0.000426123 | TPN6        | TPN6                             | NM_001043353NM_153649NM_001159484NM_001043353N | 3UTR;3UTR;3UTR;3UTR       | N_Shelf |
| cg11718162 | 0.101182963 | 0.202869623 | 0.129375093  | 0.000426123 | TPN6        | TPN6                             |                                                |                           | N_Shelf |
| cg13997788 | 0.844035405 | 0.713337735 | -0.13049767  | 0.000430331 | EPAS1       | EPAS1                            | NM_001430                                      | Body                      | N_Shelf |
| cg07274480 | 0.785464835 | 0.892921419 | 0.107457034  | 0.000430331 | GRN143      | GRN143                           | NM_000273                                      | Body                      | N_Shelf |
| cg08123701 | 0.64453928  | 0.61053292  | 0.11636078   | 0.000430626 | MTB1        | MTB1                             | NM_021080                                      | Body                      | N_Shelf |
| cg02672530 | 0.050002961 | 0.17923058  | 0.192276119  | 0.00043143  | ADRB2       | ADRB2;ADRB2                      | NM_000024NM_000024                             | 1stExon;SUTR              | N_Shelf |
| cg08370787 | 0.884264602 | 0.7349081   | -0.49356503  | 0.000431679 | ZKSCAN3     | ZKSCAN3;ZKSCAN3;ZKSCAN3;ZKSCAN3  | NM_024493NM_00132158NM_024493NM_145909         | 1stExon;SUTR              | N_Shelf |
| cg09154723 | 0.121123187 | 0.268861161 | -0.131475355 | 0.000433062 | PINK1       | PINK1                            | NM_032409                                      | Body                      | N_Shelf |
| cg24608458 | 0.920339516 | 0.885401616 | -0.109365725 | 0.000433062 | SMO2C       | SMO2C;SMO2C                      | NM_0221336NM_001166412                         | TSS1500                   | N_Shelf |
| cg11298535 | 0.94459391  | 0.835070208 | -0.109365725 | 0.000433062 | WNT1        | WNT1                             | NM_011798                                      | Body                      | N_Shelf |
| cg26693220 | 0.700393183 | 0.515803383 | -0.190179527 | 0.000433684 | KIAA1370    | KIAA1370                         | NM_019600                                      | Body                      | N_Shelf |
| cg22715398 | 0.915402717 | 0.771540276 | -0.143862441 | 0.000436754 | MEM175      | MEM175                           | NM_032326                                      | SUTR                      | N_Shelf |
| cg08776219 | 0.921789445 | 0.785303313 | -0.136875633 | 0.000438103 | MAP4K4      | MAP4K4;MAP4K4;MAP4K4             | NM_145687NM_004894NM_145686                    | Body;Body;Body            | N_Shelf |
| cg25242328 | 0.741242328 | 0.84508235  | 0.84508235   | 0.00043932  | NPAS2       | NPAS2                            | NM_002518                                      | SUTR                      | N_Shelf |
| cg05878952 | 0.937515373 | 0.774601251 | -0.162914123 | 0.000439462 | NPAS2       | NPAS2                            |                                                |                           | N_Shelf |
| cg27471156 | 0.947169486 | 0.840610626 | -0.10655886  | 0.000442066 | NPAS2       | NPAS2                            |                                                |                           | N_Shelf |
| cg09192225 | 0.161234927 | 0.28829392  | 0.117282939  | 0.000445209 | NPAS2       | NPAS2                            |                                                |                           | N_Shelf |
| cg26526443 | 0.91003883  | 0.688446577 | -0.221592256 | 0.00044866  |             |                                  |                                                |                           | N_Shelf |
| cg00469814 | 0.164790537 | 0.292709798 | 0.129719262  | 0.000452019 | PAFAH1B3    | PAFAH1B3;PRR19;PAFAH1B3;PAFAH1B3 | NM_002573NM_199285NM_001145939NM_001145940     | TSS1500;SUTR;TSS1500;TSS  | N_Shelf |
| cg13915576 | 0.710089156 | 0.812907056 | 0.102918267  | 0.000453069 |             |                                  |                                                |                           | N_Shelf |
| cg22995255 | 0.904680111 | 0.778140465 | -0.126539646 | 0.000453069 |             |                                  |                                                |                           | N_Shelf |
| cg06828256 | 0.945665096 | 0.718858253 | 0.132917435  | 0.000453109 |             |                                  |                                                |                           | N_Shelf |
| cg01580574 | 0.714032897 | 0.47458937  | -0.29445277  | 0.000454146 |             |                                  |                                                |                           | N_Shelf |
| cg15462372 | 0.919845399 | 0.74902408  | -0.170821319 | 0.000457324 |             |                                  |                                                |                           | N_Shelf |
| cg23935225 | 0.888023118 | 0.75108     |              |             |             |                                  |                                                |                           |         |





|            |             |             |              |             |             |                          |                                                |                      |         |
|------------|-------------|-------------|--------------|-------------|-------------|--------------------------|------------------------------------------------|----------------------|---------|
| q001166299 | 0.928079084 | 0.782379815 | -0.145699269 | 0.001104503 | BANP        | BANP/BANP                | NM_017869NM_074837                             | Body/Body            |         |
| q12630147  | 0.071261614 | 0.199661614 | 0.199421161  | 0.127052398 | TE11        | TE1                      | NM_030625                                      | SUTR                 | S_Shore |
| q18376163  | 0.063106171 | 0.164322    | 0.101215829  | 0.001108754 | KIFC2       | KIFC2;CYHR1;RPLC1;CYHR1  | NM_145754NM_00112988NM_138496NM_032687         | TS1500;TS200;TS1500; | Island  |
| q18751231  | 0.07739416  | 0.188029314 | 0.110699154  | 0.001113813 | SCHP1       | SCHP1                    | NM_014575                                      | Body                 | N_Shelf |
| q01874309  | 0.900728946 | 0.758928946 | 0.148528907  | 0.001113831 | HEATRA      | HEATRA                   | NM_203209NM_014575                             | Body                 | N_Shelf |
| q10440852  | 0.079908808 | 0.224048294 | 0.144139486  | 0.001119371 | AAAS        | AAAS                     | NM_015665                                      | TS1500               | S_Shore |
| q26452811  | 0.910217565 | 0.76185077  | 0.134032488  | 0.001120679 | GEDC3       | GEDC3                    | NM_004884                                      | Body                 | N_Shelf |
| q14787753  | 0.92124589  | 0.755212458 | 0.145328007  | 0.001121044 | STK39       | STK39                    | NM_013233                                      | Body                 | N_Shelf |
| q03846960  | 0.88822617  | 0.73540428  | 0.152821928  | 0.001123598 | JARID2      | JARID2                   | NM_004973                                      | TS1500               | Island  |
| q17600863  | 0.842855143 | 0.720056502 | -0.122798641 | 0.001123886 | LOC10188947 | LOC10188947              | NR_024467                                      | TS1500               | Island  |
| q06501366  | 0.232926002 | 0.188929122 | -0.120512832 | 0.001123882 | BHM2        | BHM2                     | NM_0176143NM_0273391                           | Body;TS1500          | Island  |
| q03688085  | 0.847281222 | 0.666756302 | -0.18052892  | 0.001125779 | KIAA1751    | KIAA1751                 | NM_001080484                                   | Body                 | N_Shelf |
| q1741302   | 0.893708127 | 0.780071265 | 0.113636861  | 0.001125956 | RND3        | RND3                     | NM_005166                                      | Body                 | N_Shore |
| q26784822  | 0.071212904 | 0.17720886  | 0.137099621  | 0.001133044 | RND3        | RND3                     | NM_005166                                      | Body                 | N_Shore |
| q08197287  | 0.05487631  | 0.185562271 | 0.130685901  | 0.001133476 | AFF1        | AFF1;AFF1                | NM_00116669NM_005935                           | Body/Body            | N_Shelf |
| q16314254  | 0.71827532  | 0.821356402 | 0.1030987    | 0.001134269 | GALNT2      | GALNT2                   | NM_004481                                      | Body/Body            | N_Shelf |
| q26275986  | 0.0632465   | 0.17397907  | 0.11065442   | 0.001135508 | FAM110A     | FAM110A                  | NM_207121NM_001042353                          | SUTR;SUTR            | Island  |
| q05385401  | 0.929737845 | 0.82515234  | 0.10493458   | 0.001135689 | GABRR1      | GABRR1                   | NR_002938                                      | TS200                | Island  |
| q16021939  | 0.905088893 | 0.795456835 | -0.09631858  | 0.001137545 | LOC284379   | LOC284379                | NR_002938                                      | Body                 | N_Shelf |
| q001766599 | 0.116513791 | 0.257508455 | 0.140994662  | 0.001139588 | DNAH7       | DNAH7                    | NM_018897                                      | Body                 | N_Shelf |
| q000054572 | 0.911863013 | 0.726900012 | 0.163865     | 0.001139968 |             |                          |                                                | Body                 | N_Shore |
| q05292788  | 0.946100563 | 0.807379009 | -0.138721554 | 0.001143244 | GABRR1      | GABRR1;GABRR1            | NM_021904NM_021903NM_001470                    | Body/Body;Body       | S_Shelf |
| q23549061  | 0.629104986 | 0.737323426 | 0.10842644   | 0.001143769 | PAK3        | PAK3;PAK3                | NM_001128167NM_001128166                       | TS1500;TS1500        | N_Shelf |
| q14283313  | 0.689097898 | 0.800743567 | 0.117829769  | 0.001145614 | CACNA2D3    | CACNA2D3                 | NM_019392                                      | Body                 | N_Shelf |
| q03920152  | 0.698725433 | 0.575470771 | -0.123254662 | 0.001146722 |             |                          |                                                | Body                 | N_Shelf |
| q16445317  | 0.945080282 | 0.79028815  | -0.154792132 | 0.00114681  | UNC1198     | UNC1198                  | NM_001080533                                   | TS200                | N_Shore |
| q007401745 | 0.938334614 | 0.843693952 | 0.104470649  | 0.001151264 | NRIF5A      | NRIF5A                   | NM_002495                                      | Body                 | N_Shore |
| q27456203  | 0.250830946 | 0.376891518 | 0.26060571   | 0.00115134  | WWP2        | WWP2;WWP2                | NM_199423NM_007014                             | Body/Body            | N_Shore |
| q05878332  | 0.88437256  | 0.768615524 | -0.15761731  | 0.00115146  |             |                          |                                                | Body                 | N_Shore |
| q27480957  | 0.921153016 | 0.81456943  | -0.16011539  | 0.001153699 | AXIN1       | AXIN1;AXIN1              | NM_003502NM_181050                             | Body/Body            | N_Shore |
| q05163325  | 0.960921516 | 0.804956617 | -0.155285339 | 0.001168356 | SNX9        | SNX9                     | NM_016224                                      | Body                 | N_Shore |
| q05940236  | 0.068594888 | 0.23489595  | 0.166301062  | 0.001168154 | DDX3        | DDX3;DDX3                | NM_001122665NM_004660                          | Body                 | Island  |
| q23403607  | 0.65889781  | 0.78935395  | 0.172085007  | 0.001172312 | BLCAP       | BLCAP                    | NM_001167821NM_001167822NM_01167822NM_006698   | SUTR;SUTR;SUTR;TS1   | Island  |
| q21498161  | 0.916440599 | 0.811371692 | 0.105088907  | 0.001172737 | SPEF2       | SPEF2                    | NM_024867                                      | Body                 | N_Shelf |
| q25116020  | 0.953114663 | 0.824731    | -0.126583663 | 0.001175624 | TRIM25      | TRIM25                   | NM_005082                                      | 3UTR                 | N_Shelf |
| q098380440 | 0.770387845 | 0.65141236  | -0.123254662 | 0.001176892 |             |                          |                                                | Body                 | N_Shore |
| q26963790  | 0.205235191 | 0.312773455 | 0.107448263  | 0.00117785  | ZMYND11     | ZMYND11                  | NM_212479NM_001161482NM_006624                 | TS1500;TS1500;TS1500 | N_Shore |
| q04737950  | 0.154848173 | 0.333028002 | 0.178179829  | 0.001178446 | ZNF578      | ZNF578                   | NM_001095964                                   | SUTR                 | N_Shore |
| q2692818   | 0.22018484  | 0.328118484 | 0.154864197  | 0.001186412 | KALRN       | KALRN;KALRN              | NM_001024660NM_003947                          | Body/Body            | N_Shelf |
| q02130098  | 0.873647967 | 0.720452232 | -0.153195735 | 0.001186422 | ZNF578      | ZNF578                   | NM_001095964                                   | SUTR                 | N_Shelf |
| q19404291  | 0.924751942 | 0.729900138 | -0.194851804 | 0.001187724 | FOX1        | FOX1                     | NM_002029                                      | TS1500               | N_Shelf |
| q25110145  | 0.20764450  | 0.312773455 | 0.181348692  | 0.00118995  | ZNF346      | ZNF346                   | NM_012279                                      | TS1500               | N_Shore |
| q00127036  | 0.901689161 | 0.273037853 | 0.100984331  | 0.001193344 | HDAC4       | HDAC4                    | NM_006037                                      | Body                 | N_Shelf |
| q17156828  | 0.677825349 | 0.7780968   | -0.15697575  | 0.001193483 |             |                          |                                                | Body                 | N_Shelf |
| q14160911  | 0.808428352 | 0.886759736 | 0.105673718  | 0.001194242 |             |                          |                                                | Body                 | N_Shelf |
| q12404044  | 0.781086018 | 0.886759736 | 0.105673718  | 0.001194242 |             |                          |                                                | Body                 | N_Shelf |
| q16081992  | 0.938673912 | 0.698359116 | -0.240314796 | 0.001196832 | SON         | SON                      | NM_032195NM_138927                             | 3UTR/Body            | N_Shore |
| q23537560  | 0.872000048 | 0.681959589 | -0.191245131 | 0.001199739 | SON         | SON                      | NM_032195NM_138927                             | 3UTR/Body            | N_Shore |
| q001471111 | 0.716558127 | 0.833217027 | 0.116658899  | 0.001200332 | SLC6A13     | SLC6A13                  | NM_016615                                      | TS1500               | N_Shore |
| q14969891  | 0.907103511 | 0.231221355 | 0.134117794  | 0.001200746 | TMC2C       | TMC2C                    | NM_014858                                      | TS1500               | N_Shore |
| q00210015  | 0.825398499 | 0.720589499 | -0.104072908 | 0.001200788 | KIAA0748    | KIAA0748                 | NM_001068815NM_001136030                       | Body                 | N_Shelf |
| q13434757  | 0.903096377 | 0.713513579 | -0.189582797 | 0.001206894 | SLC22A1     | SLC22A1                  | NM_003057NM_153181                             | TS1500;TS1500        | N_Shelf |
| q09152949  | 0.91266845  | 0.77612368  | -0.13656277  | 0.001213117 | TBCD        | TBCD                     | NM_005993                                      | Body                 | N_Shelf |
| q04563998  | 0.474441131 | 0.61266845  | 0.177285462  | 0.001213227 | ARHGEP3     | ARHGEP3                  | NM_001473353NM_0181727                         | SUTR;TS1500          | N_Shelf |
| q15698945  | 0.95916261  | 0.852198412 | -0.106964198 | 0.00121618  | TAAR9       | TAAR9                    | NM_175057                                      | Body                 | N_Shelf |
| q000973424 | 0.939171785 | 0.747872896 | -0.191304289 | 0.001220159 |             |                          |                                                | Body                 | N_Shore |
| q001726890 | 0.641275744 | 0.747872896 | -0.191304289 | 0.001220159 |             |                          |                                                | Body                 | N_Shore |
| q14470998  | 0.057083954 | 0.166440617 | 0.109356663  | 0.001223903 | TFAP2B      | TFAP2B                   | NM_003221                                      | 3UTR                 | N_Shore |
| q13116601  | 0.91595598  | 0.792906085 | -0.123048955 | 0.001225265 | PAG1        | PAG1                     | NM_018440                                      | SUTR                 | N_Shelf |
| q19995850  | 0.854809386 | 0.8213339   | -0.1213339   | 0.001226235 | SCOC        | SCOC                     | NM_032547                                      | SUTR                 | N_Shelf |
| q06775361  | 0.90605273  | 0.802835967 | -0.103216763 | 0.001229695 | SCOC        | SCOC                     | NM_032547                                      | SUTR                 | N_Shelf |
| q14766621  | 0.85841544  | 0.756355132 | -0.102106412 | 0.001229742 | MYT1L       | MYT1L                    | NM_015025                                      | Body                 | N_Shelf |
| q00547068  | 0.91174952  | 0.613059713 | -0.198655239 | 0.001231108 | FAM196B     | FAM196B;DOCK2            | NM_001128691NM_004946                          | Body/Body            | N_Shore |
| q02821961  | 0.70518919  | 0.822000938 | 0.11744784   | 0.001231202 | OR6B2       | OR6B2                    | NM_001003853                                   | Body                 | N_Shore |
| q16701938  | 0.876363338 | 0.726008038 | -0.1437625   | 0.001231336 | FOD3        | FOD3;FOD3                | NM_00146595NM_201559                           | Body/Body            | N_Shore |
| q11940381  | 0.956508574 | 0.865304343 | -0.100204222 | 0.001232755 | FOD3        | FOD3;FOD3                | NM_00146595NM_201559                           | Body/Body            | N_Shore |
| q22276811  | 0.87787816  | 0.7237816   | -0.154084161 | 0.001232922 | PSD3        | PSD3;PSD3                | NM_020509NM_015310                             | Body                 | N_Shore |
| q24034992  | 0.276967302 | 0.176418999 | -0.100548304 | 0.001235861 | YIPF6       | YIPF6                    | NM_173834                                      | Body                 | Island  |
| q05736633  | 0.94533971  | 0.808355662 | -0.134178308 | 0.001236094 | WDR20       | WDR20                    | NM_173834                                      | Body                 | N_Shore |
| q18412884  | 0.81161135  | 0.868167135 | -0.100548304 | 0.001236094 | WDR20       | WDR20;WDR20;WDR20;PS90A1 | NM_181291NM_181308NM_144574NM_181302NM_0010179 | TS1500;TS1500;TS1500 | N_Shore |
| q08073874  | 0.883009772 | 0.695900341 | -0.187109431 | 0.00124799  | STT3A       | STT3A                    | NM_152713                                      | Body                 | N_Shore |
| q14802591  | 0.938636364 | 0.821641173 | -0.16895191  | 0.001247166 | STT3A       | STT3A                    | NM_152713                                      | Body                 | N_Shore |
| q11147252  | 0.88942352  | 0.799584844 | -0.14687318  | 0.001247451 | ATP10A      | ATP10A                   | NM_024490                                      | Body                 | N_Shelf |
| q24133724  | 0.658959955 | 0.60913434  | -0.101953499 | 0.00124989  | ATP10A      | ATP10A                   | NM_024490                                      | Body                 | N_Shelf |
| q26266968  | 0.12161793  | 0.42386438  | 0.12072534   | 0.001249897 | LZT52       | LZT52                    | NM_032429                                      | TS200                | N_Shore |
| q05347985  | 0.960456249 | 0.855264827 | -0.105191422 | 0.001251105 | AK5         | AK5                      | NM_174858NM_012093                             | Body;SUTR            | N_Shelf |
| q27409870  | 0.926993094 | 0.744339966 | -0.152532127 | 0.001251857 | AK5         | AK5                      | NM_174858NM_012093                             | Body;SUTR            | N_Shelf |
| q00764981  | 0.910000000 | 0.723552598 | -0.174473942 | 0.001251946 | ITGAM       | ITGAM;ITGAM              | NM_00114580NM_006632                           | 3UTR;SUTR            | N_Shelf |
| q10062617  | 0.147277853 | 0.277614281 | 0.130336427  | 0.001252067 | TSSC4       | TSSC4                    | NM_005706                                      | TS1500               | N_Shelf |
| q05000275  | 0.95111809  | 0.79357212  | -0.154575597 | 0.001252278 | SURF6       | SURF6                    | NM_006753                                      | Body                 | N_Shore |
| q17181168  | 0.64491194  | 0.75300194  | -0.117049291 | 0.001253547 | STRG1A1     | STRG1A1                  | NM_003034                                      | Body                 | N_Shore |
| q02059980  | 0.840591415 | 0.665358275 | -0.1842314   | 0.00125432  | SSH1        | SSH1;SSH1;SSH1           | NM_001161331NM_001161330NM_018984              | Body/Body;Body       | N_Shore |
| q1552603   | 0.924294332 | 0.617639926 | -0.106654406 | 0.001256069 | PITPNP      | PITPNP;PITPNP;PITPNP     | NM_002847NM_130842NM_130843                    | Body/Body;Body       | N_Shore |
| q10038523  | 0.91040098  | 0.723552598 | -0.174473942 | 0.001256701 | WPS13D      | WPS13D                   | NM_015327NM_015156                             | Body                 | N_Shore |
| q24041453  | 0.125976872 | 0.242023654 | 0.116046782  | 0.001259191 | CDCD11      | CDCD11                   | NM_145520                                      | 1stExon              | N_Shore |
| q24408205  | 0.907939312 | 0.16898611  | -0.101946799 | 0.001259227 | SF3B4       | SF3B4                    | NM_008000                                      | TS1500               | N_Shore |
| q22825550  | 0.868396018 |             |              |             |             |                          |                                                |                      |         |



|            |             |             |              |              |          |                             |              |                                                  |  |                         |         |
|------------|-------------|-------------|--------------|--------------|----------|-----------------------------|--------------|--------------------------------------------------|--|-------------------------|---------|
| cg22657404 | 0.271712277 | 0.39132006  | 0.11961929   | 0.001793456  | RNF114   | RNF114                      |              | NM_0018683                                       |  | TSS1500                 | N_Shore |
| cg06880515 | 0.17419623  | 0.81479223  | -0.12758941  | 0.00195956   | GRIN2A   | GRIN2A;GRIN2A;GRIN2A        | NM_001134407 | NM_000833;NM_001134408                           |  | Body;Body               | S_Shelf |
| cg09202689 | 0.94459212  | 0.840703635 | -0.10388845  | 0.001801699  |          |                             |              |                                                  |  |                         |         |
| cg22582187 | 0.78646798  | 0.49250861  | -0.29359337  | 0.001805248  |          |                             |              |                                                  |  |                         |         |
| cg24627258 | 0.12139163  | 0.23019163  | 0.10670142   | 0.001805649  | NDFUSE   | NDFUSE;MBRL36               |              | NM_0045533M;032479                               |  | TSS1500;TSS1500         | Island  |
| cg13965224 | 0.931576399 | 0.820118686 | -0.111457714 | 0.001806471  | CTBP1    | CTBP1;CTBP1                 |              | NM_001328;NM_001021614                           |  | Body;Body               | N_Shore |
| cg09595415 | 0.15623048  | 0.285760252 | 0.129330028  | 0.001806487  | SKY      | SKY                         |              | NM_003140                                        |  | TSS200                  | N_Shore |
| cg16531222 | 0.94048822  | 0.45448822  | -0.105216455 | 0.001806531  | ETV6     | ETV6                        |              | NM_0011987                                       |  | Body                    | S_Shelf |
| cg10827754 | 0.92296215  | 0.781852498 | -0.141116177 | 0.001820919  |          |                             |              |                                                  |  |                         |         |
| cg16198930 | 0.66864051  | 0.488593811 | -0.18004674  | 0.001824293  |          |                             |              |                                                  |  |                         |         |
| cg19325487 | 0.76755579  | 0.85770352  | 0.06770352   | 0.001825596  |          |                             |              |                                                  |  |                         |         |
| cg13950362 | 0.639831685 | 0.745282421 | 0.105451136  | 0.001828022  | DEFB123  | DEFB123                     |              | NM_153324                                        |  | TSS1500                 | S_Shore |
| cg27386614 | 0.915575334 | 0.814314729 | -0.101260265 | 0.001828286  | AQR      | AQR                         |              | NM_0014691                                       |  | TSS1500                 | N_Shore |
| cg12700701 | 0.670829561 | 0.70309561  | 0.118306201  | 0.001830117  | GRP32    | GRP32                       |              | NM_0011506                                       |  | 1stExon                 | N_Shore |
| cg08648584 | 0.741317697 | 0.846914801 | 0.105597104  | 0.001833431  | LFXN     | LFXN;LFXN                   |              | NM_001143995;NM_004811                           |  | 3UTR;3UTR               | N_Shore |
| cg26719638 | 0.925568034 | 0.795134579 | -0.130433455 | 0.001837619  |          |                             |              |                                                  |  |                         |         |
| cg11053489 | 0.9095009   | 0.201415838 | 0.101914957  | 0.001838484  | ENTPD5   | ENTPD5;C14orf45             |              | NM_001249;NM_025057                              |  | SUTR;TSS1500            | N_Shore |
| cg13759786 | 0.935113942 | 0.57611233  | -0.17806271  | 0.001841931  |          |                             |              |                                                  |  |                         |         |
| cg22795059 | 0.876840105 | 0.666081485 | -0.210758621 | 0.001841558  |          |                             |              |                                                  |  |                         |         |
| cg02739700 | 0.103622541 | 0.204373521 | 0.10075098   | 0.001844196  | SPTBN4   | SPTBN4                      |              | NM_025213;NM_020971                              |  | TSS200;Body             | N_Shore |
| cg11988783 | 0.73295539  | 0.56326219  | -0.171871339 | 0.001844619  |          |                             |              |                                                  |  |                         |         |
| cg27565550 | 0.719824537 | 0.587830995 | -0.131993542 | 0.001847062  | SNP1     | SNP1                        |              | NM_024700                                        |  | TSS1500                 | N_Shore |
| cg20768399 | 0.70514168  | 0.822097664 | 0.12583496   | 0.001847474  | EYAZ2    | EYAZ2;EYAZ2                 |              | NM_172110;NM_005244                              |  | SUTR;SUTR               | S_Shelf |
| cg03060911 | 0.90895958  | 0.66103395  | -0.12325495  | 0.001849031  | NXP1     | NXP1                        |              | NM_152745                                        |  | Body                    | S_Shelf |
| cg02614372 | 0.894403443 | 0.753851933 | -0.14055151  | 0.001850493  |          |                             |              |                                                  |  |                         |         |
| cg17371020 | 0.271096338 | 0.37301897  | 0.10192342   | 0.001853349  | TRM2     | TRM2;TRM2                   |              | NM_015271;NM_001130067                           |  | TSS200;SUTR             | N_Shore |
| cg18764240 | 0.841587912 | 0.701789304 | -0.13980208  | 0.001857758  | FAM47C   | FAM47C                      |              | NM_001013736                                     |  | 1stExon                 | Island  |
| cg04320632 | 0.967509732 | 0.782068427 | -0.185441305 | 0.001867361  |          |                             |              |                                                  |  |                         |         |
| cg13764979 | 0.212452378 | 0.348461327 | 0.136080948  | 0.001868375  |          |                             |              |                                                  |  |                         |         |
| cg03068577 | 0.70315119  | 0.804272939 | 0.084272939  | 0.001874142  | KRT5     | KRT5                        |              | NM_000424                                        |  | TSS1500                 | N_Shore |
| cg01441127 | 0.894212146 | 0.78267777  | -0.11543746  | 0.001875509  | MR1      | MR1                         |              | NM_001531                                        |  | TSS1500                 | N_Shore |
| cg25972924 | 0.114139006 | 0.227592816 | 0.1327381    | 0.00187674   | FOXM1    | FOXM1                       |              | NM_000424                                        |  | TSS1500                 | N_Shore |
| cg25306491 | 0.844323343 | 0.68423018  | -0.10638788  | 0.001883664  |          |                             |              |                                                  |  |                         |         |
| cg04337937 | 0.859488355 | 0.695959861 | -0.138888674 | 0.001883879  | SACS     | SACS                        |              | NM_014363                                        |  | TSS1500                 | N_Shore |
| cg03211132 | 0.144705857 | 0.28765843  | 0.42925574   | 0.001884125  | SELE     | SELE                        |              | NM_000450                                        |  | TSS1500                 | N_Shore |
| cg03069911 | 0.90895958  | 0.66103395  | -0.12325495  | 0.001890031  | MTF3     | MTF3;MTF3;MTF3              |              | NM_001166262;NM_152924;NM_001166261;NM_001166263 |  | Body;Body;Body;Body     | N_Shore |
| cg00082656 | 0.835067218 | 0.683323932 | -0.149543286 | 0.001886107  | SRPK2    | SRPK2                       |              | NM_182692                                        |  | Body                    | N_Shore |
| cg16379462 | 0.087898875 | 0.221119926 | 0.33221051   | 0.00189139   | SAMD4A   | SAMD4A;SAMD4A               |              | NM_00116157;NM_00115589                          |  | Body;Body               | N_Shore |
| cg16167782 | 0.852195789 | 0.683323932 | -0.26939933  | 0.001902008  | TSK1     | TSK1                        |              | NM_005786                                        |  | SUTR                    | N_Shore |
| cg19112757 | 0.910325909 | 0.801901807 | -0.108424101 | 0.001903402  |          |                             |              |                                                  |  |                         |         |
| cg10332321 | 0.679698618 | 0.793619868 | 0.1392125    | 0.001904407  | CAMT1A   | CAMT1A                      |              | NM_015215                                        |  | Body                    | N_Shore |
| cg13729203 | 0.933913512 | 0.81479223  | -0.16150417  | 0.001905672  | C14orf19 | C14orf19                    |              | NM_020397                                        |  | Body                    | N_Shore |
| cg0685839  | 0.864033308 | 0.735626187 | -0.128409122 | 0.001907975  | KIRREL   | KIRREL                      |              | NM_018240                                        |  | Body                    | N_Shore |
| cg19290808 | 0.978495327 | 0.858614897 | -0.119880431 | 0.001909672  |          |                             |              |                                                  |  |                         |         |
| cg05356778 | 0.743491574 | 0.61479223  | -0.104670554 | 0.001911535  | WSCR17   | WSCR17                      |              | NM_022479                                        |  | Body                    | N_Shore |
| cg11085062 | 0.914855295 | 0.803479836 | -0.111375459 | 0.001917823  | ZNF280D  | ZNF280D;ZNF280D;ZNF280D     |              | NM_001002844;NM_00102843;NM_017661               |  | SUTR;SUTR;SUTR          | N_Shore |
| cg16754015 | 0.913283868 | 0.772209356 | -0.14119012  | 0.001918614  | ADAR2    | ADAR2                       |              | NM_018702                                        |  | Body                    | N_Shore |
| cg04530597 | 0.533196563 | 0.208379656 | 0.10318474   | 0.001919252  | SH3BP4   | SH3BP4                      |              | NM_014521                                        |  | SUTR                    | N_Shore |
| cg24029640 | 0.904531927 | 0.80401256  | -0.110519367 | 0.00192631   |          |                             |              |                                                  |  |                         |         |
| cg08614769 | 0.95586663  | 0.818646325 | -0.137202305 | 0.001927183  | GMS5     | GMS5                        |              | NM_001500                                        |  | Body                    | N_Shore |
| cg04942616 | 0.91321959  | 0.729321959 | -0.16597393  | 0.00192901   | GMS4     | GMS4                        |              | NM_000840                                        |  | SUTR                    | N_Shore |
| cg08080848 | 0.944292044 | 0.837446785 | -0.106845259 | 0.001929717  |          |                             |              |                                                  |  |                         |         |
| cg10475690 | 0.954892204 | 0.846768154 | -0.10812405  | 0.001935835  | MTCF1NB  | MTCF1NB;MTCF1               |              | NM_001018024;NM_001018025                        |  | SUTR;Body               | N_Shore |
| cg22189125 | 0.91842228  | 0.78267777  | -0.12782228  | 0.001937082  | ZNF302   | ZNF302;ZNF302               |              | NM_001012328;NM_018443                           |  | Body;Body               | N_Shore |
| cg15734483 | 0.907755114 | 0.689798178 | -0.217956936 | 0.001935924  | MADP7D   | MADP7D;MADP7D;MADP7D;MADP7D |              | NM_001168465;NM_001168467;NM_152780;NM_001168469 |  | TSS1500;TSS1500;TSS1500 | Island  |
| cg27049690 | 0.947501351 | 0.81479223  | -0.127049690 | 0.001937082  | TNRC2C   | TNRC2C;TNRC2C;TNRC2C        |              | NM_001098529;NM_001098529;NM_001098529           |  | Body;Body;Body          | N_Shore |
| cg00704226 | 0.324421919 | 0.45748838  | 0.133046461  | 0.001958238  | ABL1M1   | ABL1M1;ABL1M1;ABL1M1        |              | NM_001003408;NM_001003407;NM_0002313             |  | Body;Body               | N_Shore |
| cg03051777 | 0.150952833 | 0.29936014  | 0.14898318   | 0.001959014  |          |                             |              |                                                  |  |                         |         |
| cg01710889 | 0.121926618 | 0.231926618 | 0.10318474   | 0.001962208  | PDLIM2   | PDLIM2                      |              | NM_176871                                        |  | 3UTR                    | N_Shore |
| cg21842031 | 0.872703388 | 0.727194373 | -0.145509014 | 0.001962208  |          |                             |              |                                                  |  |                         |         |
| cg24338491 | 0.148663271 | 0.264901895 | 0.16238785   | 0.001963939  | SH3BP5   | SH3BP5                      |              | NM_001099289                                     |  | Body                    | N_Shore |
| cg25707877 | 0.833077151 | 0.690200576 | -0.142876576 | 0.00196451   | EFNA5    | EFNA5                       |              | NM_00119629                                      |  | Body                    | N_Shore |
| cg10178939 | 0.951191309 | 0.853389001 | -0.106338901 | 0.001964763  |          |                             |              |                                                  |  |                         |         |
| cg13496119 | 0.887708866 | 0.746232341 | -0.163076525 | 0.001967924  |          |                             |              |                                                  |  |                         |         |
| cg15742123 | 0.888205072 | 0.766714059 | -0.101491013 | 0.0019698917 | C7orf50  | C7orf50;C7orf50;C7orf50     |              | NM_001134395;NM_023250;NM_001134396              |  | Body;Body;Body          | N_Shore |
| cg14158769 | 0.94195878  | 0.771145897 | -0.116839008 | 0.001974788  | MIR592   | MIR592                      |              | NM_0303233;NM_001172323;NM_028041;NM_000845      |  | Body;Body;Body          | N_Shore |
| cg01479664 | 0.859253363 | 0.70060616  | -0.159465203 | 0.00197149   | TEPP     | TEPP;TEPP                   |              | NM_199456;NM_199046                              |  | Body;Body               | N_Shore |
| cg09617135 | 0.168927124 | 0.328598621 | 0.160031498  | 0.001975491  |          |                             |              |                                                  |  |                         |         |
| cg12115103 | 0.947403666 | 0.842684666 | -0.104372982 | 0.001976788  |          |                             |              |                                                  |  |                         |         |
| cg14778264 | 0.864126647 | 0.75604201  | -0.108084637 | 0.001979527  |          |                             |              |                                                  |  |                         |         |
| cg01709551 | 0.81801476  | 0.621965899 | -0.196048662 | 0.001981138  |          |                             |              |                                                  |  |                         |         |
| cg21818480 | 0.930858564 | 0.840865504 | -0.116982405 | 0.001983845  |          |                             |              |                                                  |  |                         |         |
| cg22449330 | 0.531820195 | 0.396067065 | -0.13575313  | 0.001987357  |          |                             |              |                                                  |  |                         |         |
| cg05584692 | 0.873176121 | 0.769896327 | -0.195297994 | 0.001995708  |          |                             |              |                                                  |  |                         |         |
| cg00849358 | 0.94486327  | 0.847198327 | -0.14714763  | 0.00199987   |          |                             |              |                                                  |  |                         |         |
| cg13485061 | 0.930484561 | 0.774923258 | -0.155692202 | 0.002014003  | AMPD1    | AMPD1                       |              | NM_000036                                        |  | Body                    | S_Shelf |
| cg01982489 | 0.88538868  | 0.761934526 | -0.106604341 | 0.002016415  |          |                             |              |                                                  |  |                         |         |
| cg09439749 | 0.848032949 | 0.745308979 | -0.145653774 | 0.002018101  | ZNF470   | ZNF470                      |              | NM_001001668                                     |  | 3UTR                    | N_Shore |
| cg08915024 | 0.932690893 | 0.797888502 | -0.134802391 | 0.002020390  | TSPANS   | TSPANS                      |              | NM_005723                                        |  | Body                    | N_Shore |
| cg07394259 | 0.912138651 | 0.749097909 | -0.163040651 | 0.002024378  | FAM110B  | FAM110B                     |              | NM_147189                                        |  | SUTR                    | N_Shore |
| cg12432313 | 0.27482282  | 0.39362882  | 0.118796914  | 0.002043719  | RND5     | RND5                        |              | NM_001045                                        |  | Body                    | N_Shore |
| cg07296597 | 0.68296544  | 0.786485836 | -0.103579292 | 0.00204472   |          |                             |              |                                                  |  |                         |         |
| cg20806296 | 0.493497927 | 0.306618178 | -0.128360659 | 0.002050691  |          |                             |              |                                                  |  |                         |         |
| cg20192995 | 0.743032589 | 0.684947515 | -0.103400002 | 0.002052923  | SLC6A4   | SLC6A4                      |              | NM_00101548                                      |  | 3UTR                    | N_Shore |
| cg11937778 | 0.726955809 | 0.604895304 | -0.122606504 | 0.002055504  | SLC37A2  | SLC37A2;SLC37A2             |              | NM_0011                                          |  |                         |         |





|            |              |             |              |              |                         |                                         |                                                                                           |           |
|------------|--------------|-------------|--------------|--------------|-------------------------|-----------------------------------------|-------------------------------------------------------------------------------------------|-----------|
| cg03588007 | 0.952665487  | 0.845075979 | -0.107589508 | 0.003547758  | TRM14;TRM14;TRM14;TRM14 | NM_033220;NM_033219;NM_014788;NM_033221 | 3UTR;3UTR;3UTR;3UTR                                                                       | N_Shore   |
| cg21513537 | 0.83613258   | 0.642126241 | -0.119271775 | -0.166189406 | 0.003551019             |                                         |                                                                                           | N_Shore   |
| cg15612847 | 0.808315646  | 0.621798713 | -0.16142169  | 0.003555878  | MITO1                   | MITO1;MRPL30                            | Body;TSS1500                                                                              | N_Shore   |
| cg14962025 | 0.911940882  | 0.750798713 | -0.105777474 | 0.003557336  | ZMAT1                   | ZMAT1                                   | SUTR                                                                                      | Island    |
| cg26142661 | 0.516001903  | 0.265853374 | -0.128393107 | 0.003558492  | SMYD3                   | SMYD3;SMYD3                             | Body;Body                                                                                 | N_Shore   |
| cg09016610 | 0.827158166  | 0.66538961  | -0.116768555 | 0.003568791  | GMAP7                   | GMAP7                                   | SUTR                                                                                      | N_Shore   |
| cg21657334 | 0.901633949  | 0.771886692 | -0.141532737 | 0.003573699  | PHH                     | PHH;PHH                                 | SUTR;Body                                                                                 | N_Shelf   |
| cg04221681 | 0.930581897  | 0.69689165  | -0.203690247 | 0.003573974  | DLG5                    | DLG5                                    | SUTR                                                                                      | S_Shore   |
| cg11063088 | 0.750428115  | 0.601850114 | -0.153243101 | 0.003575659  |                         |                                         |                                                                                           | N_Shelf   |
| cg10171307 | 0.696300482  | 0.86038074  | -0.103080259 | 0.003579821  |                         |                                         |                                                                                           | S_Shore   |
| cg04265964 | 0.916003384  | 0.807862953 | -0.108140431 | 0.003583004  |                         |                                         |                                                                                           | N_Shore   |
| cg21156970 | 0.815800192  | 0.715440894 | -0.105293259 | 0.003586062  |                         |                                         |                                                                                           | N_Shore   |
| cg09674502 | 0.898744846  | 0.791338299 | -0.107460447 | 0.003590728  | GF11                    | GF11                                    | NM_005263                                                                                 | S_Shore   |
| cg25493764 | 0.906577379  | 0.800061962 | -0.106495416 | 0.003590907  | KLHL3                   | KLHL3                                   | NM_017415                                                                                 | N_Shore   |
| cg26303996 | 0.88842044   | 0.785825543 | -0.105016501 | 0.003595225  | ZNF264                  | ZNF264                                  | NM_003417                                                                                 | S_Shore   |
| cg09002746 | 0.934938963  | 0.817010938 | -0.117928024 | 0.003597982  | HMC4                    | HMC4;HMC3;HMC6                          | NM_014620;NR_003084;NM_153693                                                             | N_Shore   |
| cg02372283 | 0.925333021  | 0.78107502  | -0.144278    | 0.003600865  | RELL1                   | RELL1;Korf19;Zc4orf19                   | NM_001085;S99;NM_018302;NM_104629                                                         | N_Shore   |
| cg19892287 | 0.057742552  | 0.20543666  | -0.147694108 | 0.003604005  |                         |                                         |                                                                                           | N_Shore   |
| cg13077660 | 0.626898749  | 0.508090997 | -0.119739663 | 0.003611116  | USP42                   | USP42                                   | NM_0032172                                                                                | S_Shelf   |
| cg07582862 | 0.143270311  | 0.250545201 | -0.107274889 | 0.003605995  |                         |                                         |                                                                                           | S_Shelf   |
| cg27221055 | 0.080995238  | 0.214737049 | -0.13374181  | 0.003609454  |                         |                                         |                                                                                           | S_Shelf   |
| cg17031362 | 0.820493921  | 0.620458192 | -0.109292176 | 0.003615521  |                         |                                         |                                                                                           | S_Shelf   |
| cg11333568 | 0.850332958  | 0.711436926 | -0.138896032 | 0.003635251  |                         |                                         |                                                                                           | S_Shelf   |
| cg13730905 | 0.914493989  | 0.795290676 | -0.11948693  | 0.003637455  | FTTL                    | FTTL                                    | NM_001010987                                                                              | S_Shelf   |
| cg14516231 | 0.708574387  | 0.812420734 | -0.103584947 | 0.003639033  | MYT3                    | MYT3;MYT3;MYT3                          | NM_001099413;NM_01099412;NM_006766                                                        | S_Shelf   |
| cg25174844 | 0.696947504  | 0.813507145 | -0.116559641 | 0.003638609  |                         |                                         |                                                                                           | S_Shelf   |
| cg02898665 | 0.745195499  | 0.596122694 | -0.147072805 | 0.003639028  | EXOC2                   | EXOC2;HUS1B                             | NM_018303;NM_148959                                                                       | S_Shelf   |
| cg0237313  | 0.86805131   | 0.651587818 | -0.2295746   | 0.003639142  | ZNF548                  | ZNF548                                  | NM_152909                                                                                 | S_Shelf   |
| cg21288315 | 0.948460084  | 0.841798707 | -0.106661376 | 0.003639383  |                         |                                         |                                                                                           | S_Shelf   |
| cg18932635 | 0.907213442  | 0.782767724 | -0.124453618 | 0.003639528  | SH3BP2                  | SH3BP2;SH3BP2;SH3BP2;SH3BP2             | NM_001122681;NM_00114585;NM_003023;NM_00114586                                            | S_Shelf   |
| cg26159036 | 0.844308942  | 0.715410894 | -0.192523419 | 0.003639761  | PLEHA7                  | PLEHA7                                  | NM_175058                                                                                 | S_Shelf   |
| cg03000989 | 0.937226611  | 0.754203192 | -0.192523419 | 0.003639761  | KIAA1267                | KIAA1267                                | NM_015443                                                                                 | S_Shelf   |
| cg07368127 | 0.921147485  | 0.801769353 | -0.119378132 | 0.003703685  | MAML3                   | MAML3                                   | NR_024358                                                                                 | S_Shelf   |
| cg09896726 | 0.918493896  | 0.742128068 | -0.247129784 | 0.003709909  | NCRNAA0028              | NCRNAA0028                              | NM_005540                                                                                 | S_Shelf   |
| cg24544594 | 0.883293191  | 0.731023782 | -0.152269409 | 0.003711475  | NPfS                    | NPfS                                    | NM_005525                                                                                 | S_Shelf   |
| cg09122414 | 0.937512236  | 0.82321352  | -0.114298716 | 0.003712375  | NPfS                    | NPfS                                    | NM_005525                                                                                 | S_Shelf   |
| cg03915012 | 0.759145162  | 0.686570251 | -0.110405241 | 0.003714882  |                         |                                         |                                                                                           | S_Shelf   |
| cg17100390 | 0.884324383  | 0.71906581  | -0.112417802 | 0.003715923  |                         |                                         |                                                                                           | S_Shelf   |
| cg16241309 | 0.885388924  | 0.730530161 | -0.154858763 | 0.00372139   | Ctorf94                 | Ctorf94                                 | NM_00113474;NM_0032884                                                                    | S_Shelf   |
| cg01176915 | 0.938467466  | 0.854746666 | -0.103741842 | 0.003721842  | DSG4                    | DSG4;DSG4                               | NM_177866;NM_001134453                                                                    | S_Shelf   |
| cg06599575 | 0.854901925  | 0.75187809  | -0.103023835 | 0.003734712  | KIAA1009                | KIAA1009                                | NM_014895                                                                                 | S_Shelf   |
| cg20964082 | 0.918227617  | 0.808466755 | -0.109760862 | 0.003740018  | EROL1B                  | EROL1B                                  | NM_019891                                                                                 | S_Shelf   |
| cg01555458 | 0.881574937  | 0.747742585 | -0.146534623 | 0.003741603  |                         |                                         |                                                                                           | S_Shelf   |
| cg15291905 | 0.860948297  | 0.75298852  | -0.103649444 | 0.003744147  | INHBA                   | INHBA;LOC285954;LOC285954               | NM_002192;NR_027118;NR_027119                                                             | S_Shelf   |
| cg2581610  | 0.908010952  | 0.798932407 | -0.109078546 | 0.003746449  | DSCRB                   | DSCRB;DSCRB;DSCRB;DSCRB;DSCRB;DSCRB     | NR_026838;NR_026840;NR_026841;NR_026842;NR_026839;NM_001085;NM_001086;NM_001087;NM_001088 | S_Shelf   |
| cg09339057 | 0.933471612  | 0.807994111 | -0.107994111 | 0.003746449  | ZSCAN1                  | ZSCAN1                                  | NM_182572                                                                                 | S_Shelf   |
| cg2548436  | 0.35208168   | 0.25084065  | -0.102027518 | 0.003749147  |                         |                                         |                                                                                           | S_Shelf   |
| cg10623600 | 0.174859236  | 0.29044446  | -0.115858224 | 0.003749826  |                         |                                         |                                                                                           | S_Shelf   |
| cg13117439 | 0.860170028  | 0.748770028 | -0.104489248 | 0.003752338  | pspTPE22                | pspTPE22                                | NR_001591                                                                                 | S_Shelf   |
| cg12832162 | 0.963981257  | 0.859291201 | -0.104489248 | 0.003752338  | PTK2B                   | PTK2B;PTK2B;PTK2B;PTK2B                 | NM_173175;NM_04103;NM_173174;NM_173176                                                    | S_Shelf   |
| cg19175386 | 0.180600508  | 0.307604487 | -0.12700398  | 0.003761747  |                         |                                         |                                                                                           | S_Shelf   |
| cg12468495 | 0.837263025  | 0.665830025 | -0.17152512  | 0.003762354  | HPK2                    | HPK2;HPK2                               | NM_022740;NM_001113239                                                                    | S_Shelf   |
| cg06578871 | 0.765982782  | 0.610057107 | -0.155925674 | 0.003764777  |                         |                                         |                                                                                           | S_Shelf   |
| cg01922700 | 0.923241552  | 0.79650844  | -0.126733112 | 0.003773921  | CRB1                    | CRB1                                    | NM_00121253                                                                               | S_Shelf   |
| cg0252871  | 0.900335382  | 0.78861882  | -0.115896939 | 0.003775919  | PNPLA4                  | PNPLA4                                  | NM_0012329;NM_004650                                                                      | S_Shelf   |
| cg20817228 | 0.900853482  | 0.77861882  | -0.122234662 | 0.003775916  | LOC728855               | LOC728855                               | NR_024510                                                                                 | S_Shelf   |
| cg02747612 | 0.873717635  | 0.674117818 | -0.199599817 | 0.003777371  | ZNF91                   | ZNF91                                   | NM_003430                                                                                 | S_Shelf   |
| cg17465894 | 0.891919142  | 0.79294714  | -0.107385011 | 0.003785071  | CDK16                   | CDK16                                   | NM_033018                                                                                 | S_Shelf   |
| cg08319412 | 0.8255094    | 0.721182949 | -0.104326451 | 0.003789963  |                         |                                         |                                                                                           | S_Shore   |
| cg18031861 | 0.774501821  | 0.653326223 | -0.121175598 | 0.003791833  |                         |                                         |                                                                                           | S_Shore   |
| cg17860366 | 0.91791427   | 0.7274929   | -0.100578629 | 0.003796371  | ABHD2                   | ABHD2;ABHD2                             | NM_152924;NM_007011                                                                       | S_Shelf   |
| cg21000368 | 0.84601566   | 0.681051566 | -0.146534623 | 0.003798759  | RBM47                   | RBM47                                   | NM_00109864                                                                               | S_Shelf   |
| cg13027369 | 0.8682729106 | 0.68683716  | -0.142341985 | 0.003799245  | KPNA4                   | KPNA4                                   | NM_002268                                                                                 | S_Shelf   |
| cg04150100 | 0.141303228  | 0.263804364 | -0.12201136  | 0.003799887  | SKZ                     | SKZ                                     | NM_015191                                                                                 | S_Shelf   |
| cg13227162 | 0.811490899  | 0.64019899  | -0.10696541  | 0.00381114   | RTL1                    | RTL1                                    | NM_00118408                                                                               | S_Shelf   |
| cg20431441 | 0.816835152  | 0.710138611 | -0.10696541  | 0.00381114   |                         |                                         |                                                                                           | S_Shelf   |
| cg07236562 | 0.92605743   | 0.825188621 | -0.124286809 | 0.003813532  |                         |                                         |                                                                                           | S_Shelf   |
| cg09638499 | 0.802132699  | 0.680689699 | -0.124286809 | 0.003813532  |                         |                                         |                                                                                           | S_Shelf   |
| cg02532821 | 0.935284922  | 0.727945564 | -0.207339358 | 0.003816698  | MED13L                  | MED13L                                  | NM_015335                                                                                 | S_Shelf   |
| cg02599019 | 0.846610379  | 0.727223918 | -0.119386461 | 0.003820117  | CTBP2                   | CTBP2;CTBP2                             | NM_00108591;NM_0013129                                                                    | S_Shelf   |
| cg21151541 | 0.906957835  | 0.807472385 | -0.10230673  | 0.003824507  | UBAP2                   | UBAP2                                   | NM_00109864                                                                               | S_Shore   |
| cg17311921 | 0.913562903  | 0.804263768 | -0.108939135 | 0.003828491  | UMC1                    | UMC1                                    | NM_016290                                                                                 | S_Shelf   |
| cg15110917 | 0.919798992  | 0.819068861 | -0.100730059 | 0.003832418  |                         |                                         |                                                                                           | S_Shelf   |
| cg09636727 | 0.919137992  | 0.83850844  | -0.139252422 | 0.003839892  | STGALNACS               | STGALNACS                               | NM_003965                                                                                 | S_Shelf   |
| cg00569673 | 0.200356898  | 0.35472519  | -0.154368292 | 0.003840846  | GSP3                    | GSP3                                    | NM_002107                                                                                 | S_Shelf   |
| cg13650965 | 0.867707893  | 0.697570255 | -0.170137638 | 0.003854327  | TPS20                   | TPS20;TPS20                             | NM_001159726;NM_00101087                                                                  | S_Shelf   |
| cg19472302 | 0.820101012  | 0.688605319 | -0.131598111 | 0.003856983  | ACAP2                   | ACAP2                                   | NM_012287                                                                                 | S_Shelf   |
| cg03029291 | 0.102565589  | 0.209904528 | -0.107339939 | 0.003861865  |                         |                                         |                                                                                           | S_Shelf   |
| cg17492395 | 0.131923801  | 0.243459561 | -0.11533576  | 0.003862052  |                         |                                         |                                                                                           | S_Shelf   |
| cg02614999 | 0.929326102  | 0.667091016 | -0.16233123  | 0.003865523  | POLR1B                  | POLR1B;POLR1B                           | NM_019014;NM_001137604                                                                    | S_Shelf   |
| cg16001323 | 0.61454671   | 0.730249293 | -0.115947821 | 0.003873413  | ADH1B                   | ADH1B                                   | NM_000668                                                                                 | S_Shelf   |
| cg22576545 | 0.117389516  | 0.227167816 | -0.1097783   | 0.003875835  | KNP2C                   | KNP2C;KNP2C;KNP2C;KNP2C;KNP2C;KNP2C     | NM_173195;NM_173191;NM_173193;NM_173194;NM_173192;NM_173196                               | S_Shelf   |
| cg20055837 | 0.939136493  | 0.69915602  | -0.169913662 | 0.003879899  | W4BP1                   | W4BP1                                   | NM_015111                                                                                 | S_Shelf   |
| cg06033194 | 0.900768994  | 0.74903112  | -0.125865862 | 0.003886272  | DPY19L1                 | DPY19L1                                 | NM_015283                                                                                 | S_Shelf   |
| cg05320533 | 0.72589544   | 0.607754169 | -0.18115375  | 0.003888715  | ANKRD11                 | ANKRD11                                 | NM_013275                                                                                 | S_Shelf   |
| cg26679158 | 0.93049824   | 0.821298027 | -0.10918887  | 0.00390009   | Csof1f86                | Csof1f86                                | NM_001123364                                                                              | S_Shelf   |
| cg24786705 | 0.908087141  | 0.799182646 | -0.10890495  | 0.003890977  |                         |                                         |                                                                                           | S_Shelf   |
| cg19915181 | 0.92987112   | 0.811259613 | -0.118567499 | 0.003891081  |                         |                                         |                                                                                           | S_Shelf   |
| cg23662002 | 0.121333333  | 0.24845859  | -0.125349371 | 0.00393308   | BDKRB1                  | BDKRB1                                  | NM_000710                                                                                 | S_Shelf   |
| cg07917797 | 0.899707851  | 0.77320836  | -0.126499491 | 0.003895398  | PWIL3                   | PWIL3;PWIL3                             | NM_001008496;NM_001008496                                                                 | S_Shelf   |
| cg08222514 | 0.147525389  | 0.24671404  | -0.102899046 | 0.003903005  | SENP6                   | SENP6;SENP6                             | NM_015571;NM_001100409                                                                    | S_Shelf   |
| cg22304239 | 0.280469412  | 0.308099412 | -0.108947491 | 0.003903463  | DAPK3                   | DAPK3                                   | NM_00113474                                                                               | S_Shelf   |
| cg08818829 | 0.598031531  | 0.714315159 | -0.116283627 | 0.003910446  | DNAH5                   | DNAH5                                   | NM_001369                                                                                 | S_Shelf   |
| cg18409895 | 0.71711966   | 0.823512695 | -0.106340728 | 0.003922502  | ATP1A1                  | ATP1A1;ATP1A1                           | NM_015205;NM_032189                                                                       | S_Shelf</ |

|            |             |              |               |             |          |                                 |                                                               |                                         |         |
|------------|-------------|--------------|---------------|-------------|----------|---------------------------------|---------------------------------------------------------------|-----------------------------------------|---------|
| cg18119394 | 0.821790664 | 0.71705499   | -0.104735674  | 0.004387782 | ILIRAPL2 | ILIRAPL2;TEX13A                 | NM_017416;NM_031274                                           | Body;SUTR                               |         |
| cg02175309 | 0.94413075  | 0.78913075   | -0.15485478   | 0.004390988 | NURPL    | NURPL                           | NM_025152                                                     | Body                                    |         |
| cg02728321 | 0.776509521 | 0.637597351  | -0.13891217   | 0.004396353 | NURPL    | NURPL                           | NM_025152                                                     | Body                                    |         |
| cg02022454 | 0.974239855 | 0.838905741  | -0.10833414   | 0.004407    | TMCO3    | TMCO3                           | NM_017905                                                     | Body                                    | N_Shore |
| cg02021400 | 0.913732533 | 0.80525473   | -0.11687808   | 0.00441164  | TBR2     | TBR2                            | NM_159047                                                     | Body                                    | N_Shore |
| cg18198306 | 0.088140346 | 0.190883047  | 0.102849001   | 0.00441718  | FBXO5    | FBXO5;FBXO5                     | NM_00114252;NM_012177                                         | SUTR;Body                               | N_Shore |
| cg19198148 | 0.853833001 | 0.96934745   | -0.160389556  | 0.004423101 | BCL6     | BCL6;BCL6;BCL6                  | NM_001706;NM_01130845;NM_001134738                            | SUTR;SUTR;SUTR                          | N_Shelf |
| cg13628937 | 0.945139346 | 0.875854546  | -0.16349724   | 0.00442445  | FLJ34503 | FLJ34503                        | NM_015102                                                     | Body                                    |         |
| cg09136597 | 0.61265407  | 0.737646298  | 0.106200891   | 0.004455773 | NHP4A    | NHP4A                           | NM_027060                                                     | Body                                    |         |
| cg02094531 | 0.503129615 | 0.612768103  | 0.109368487   | 0.004457448 | FLJ34503 | FLJ34503                        | NM_015102                                                     | Body                                    |         |
| cg07479270 | 0.943989412 | 0.825808142  | -0.115388049  | 0.004468327 | SRP22    | SRP22;SRP22                     | NM_014467;NM_014467                                           | 1stExon;SUTR                            | S_Shore |
| cg19905504 | 0.884025137 | 0.773491317  | -0.110533819  | 0.00446868  | ESGAT1   | ESGAT1                          | NM_00116689;NM_00116689                                       | Body;Body;Body                          |         |
| cg02466876 | 0.41199332  | 0.520192335  | 0.108199014   | 0.00447418  | SRP22    | SRP22;SRP22                     | NM_014467;NM_014467                                           | 1stExon;SUTR                            | S_Shore |
| cg10389997 | 0.098961205 | 0.2044661205 | 0.105780008   | 0.004482445 | ESGAT1   | ESGAT1                          | NM_00116689;NM_00116689                                       | Body;Body;Body                          |         |
| cg18910703 | 0.171949558 | 0.296735156  | 0.124785598   | 0.004468691 | KCNMA1   | KCNMA1;KCNMA1;KCNMA1;KCNMA1     | NM_001161353;NM_001161352;NM_002247;NM_001014797              | Body;Body;Body;Body                     | Island  |
| cg13683424 | 0.192703383 | 0.33998832   | 0.136695449   | 0.004471949 | TLL2     | TLL2                            | NM_013149                                                     | TS1500                                  |         |
| cg21970438 | 0.727378793 | 0.875325964  | 0.101574171   | 0.004479708 | EML1     | EML1;EML1                       | NM_00100870;NM_0040434                                        | Body;Body                               | S_Shelf |
| cg09247557 | 0.926305329 | 0.826305329  | -0.16549729   | 0.004493943 | ZNF605   | ZNF605                          | NM_1832338;NM_01164715                                        | Body;Body                               | N_Shore |
| cg17217741 | 0.86544369  | 0.762636524  | -0.102807166  | 0.004486003 | CNR8     | CNR8                            | NM_00117926                                                   | Body;Body                               | N_Shore |
| cg11807290 | 0.870770648 | 0.705345391  | -0.165425257  | 0.004489227 | ZNF605   | ZNF605                          | NM_1832338;NM_01164715                                        | Body;Body                               | N_Shore |
| cg07244927 | 0.711917831 | 0.78515873   | 0.102899761   | 0.004495446 | CNR8     | CNR8                            | NM_00117926                                                   | Body;Body                               | N_Shore |
| cg00598866 | 0.941436121 | 0.78961715   | -0.115764371  | 0.004496973 | NHP4B    | NHP4B;NHP4B                     | NM_003866;NM_001101669                                        | Body;Body                               | N_Shore |
| cg02094291 | 0.511202599 | 0.61578436   | 0.10458176    | 0.00451098  | CAS21    | CAS21;CAS21                     | NM_00107984;NM_00117766                                       | SUTR;SUTR                               |         |
| cg24661860 | 0.874645912 | 0.798787029  | 0.124140117   | 0.004502784 | NUP210L  | NUP210L;NUP210L                 | NM_00115948;NM_207308                                         | Body;Body                               |         |
| cg26373922 | 0.898245127 | 0.79211247   | -0.106132657  | 0.004506462 | NUP210L  | NUP210L;NUP210L                 | NM_00115948;NM_207308                                         | Body;Body                               | Island  |
| cg12136632 | 0.722142398 | 0.827896881  | 0.105547383   | 0.004509566 | GJB6     | GJB6;GJB6;GJB6;GJB6             | NM_001110220;NM_001110221;NM_001110222;NM_006763              | SUTR;SUTR;SUTR;SUTR                     |         |
| cg14373111 | 0.832766406 | 0.712866244  | -0.124897763  | 0.004512316 | GJB6     | GJB6;GJB6;GJB6;GJB6             | NM_001110220;NM_001110221;NM_001110222;NM_006763              | SUTR;SUTR;SUTR;SUTR                     |         |
| cg19462116 | 0.875133217 | 0.705094629  | -0.144538858  | 0.004517288 | DP2C     | DP2C                            | NM_014974                                                     | SUTR;SUTR;SUTR;SUTR                     |         |
| cg26390924 | 0.814601244 | 0.712962787  | -0.110163845  | 0.004518063 | GABPB1   | GABPB1;GABPB1;GABPB1;GABPB1     | NM_016655;NM_002524;NM_016654;NM_002041;NM_181427             | SUTR;SUTR;SUTR;SUTR                     |         |
| cg04451988 | 0.92084988  | 0.81818688   | -0.11818688   | 0.004519232 | AF1      | AF1                             | NM_00116689;NM_003535                                         | Body;Body                               |         |
| cg10669424 | 0.847788742 | 0.841796009  | -0.105992733  | 0.004528475 | VGLL4    | VGLL4                           | NM_014667                                                     | TS1500                                  | S_Shore |
| cg04173714 | 0.702023116 | 0.181504342  | 0.111271162   | 0.004534719 | AKAP13   | AKAP13;AKAP13                   | NM_00702700;NM_006738                                         | Body;Body                               |         |
| cg07387734 | 0.947315874 | 0.815215874  | -0.1215874    | 0.004540232 | NFYC     | NFYC;NFYC;NFYC;NFYC             | NM_001142589;NM_014223;NM_001142587;NM_001142588;NM_001142589 | Body;Body;Body;Body                     | TS15    |
| cg16859420 | 0.235182424 | 0.370216719  | 0.135034295   | 0.004550518 | AC1      | AC1                             | NM_001142589;NM_014223;NM_001142587;NM_001142588;NM_001142589 | Body;Body;Body;Body                     | TS15    |
| cg25728188 | 0.137546682 | 0.248505588  | 0.10751176    | 0.004562752 | RMNDS4   | RMNDS4                          | NM_022780                                                     | 3UTR                                    |         |
| cg14152778 | 0.89856794  | 0.760516576  | -0.11477769   | 0.004562752 | SLC30A6  | SLC30A6                         | NM_017964                                                     | 3UTR                                    |         |
| cg10277836 | 0.865971285 | 0.760516576  | -0.105457009  | 0.004564669 | SLC30A6  | SLC30A6                         | NM_017964                                                     | 3UTR                                    |         |
| cg09638516 | 0.904584016 | 0.720989098  | -0.183589318  | 0.004567551 | AD1      | AD1                             | NM_018269                                                     | 3UTR                                    | N_Shelf |
| cg14152778 | 0.89856794  | 0.760516576  | -0.11477769   | 0.004562752 | SLC30A6  | SLC30A6                         | NM_017964                                                     | 3UTR                                    |         |
| cg19471111 | 0.883058262 | 0.713067108  | -0.169991154  | 0.004576066 | TNXB     | TNXB                            | NM_019105                                                     | SUTR                                    |         |
| cg00997853 | 0.804152202 | 0.160487512  | 0.1893351     | 0.004583533 | ITPR2    | ITPR2                           | NM_002223                                                     | Body                                    |         |
| cg20323865 | 0.959465912 | 0.78465912   | -0.1611771    | 0.004590323 | PARD3B   | PARD3B;PARD3B;PARD3B            | NM_152526;NM_0011773;NM_205863                                | Body;Body;Body                          |         |
| cg06746362 | 0.876588859 | 0.656552027  | -0.220016832  | 0.004586572 | PTPN21   | PTPN21                          | NM_007039                                                     | Body                                    | S_Shore |
| cg00832547 | 0.83750074  | 0.711418185  | -0.26358854   | 0.00459028  | RAGE     | RAGE                            | NM_014226                                                     | Body                                    |         |
| cg2547520  | 0.13262083  | 0.13262083   | -0.124183091  | 0.004594317 | SMAD3    | SMAD3;SMAD3;SMAD3               | NM_005902;NM_001145103;NM_001145102                           | Body;Body;SUTR                          |         |
| cg07938847 | 0.63279562  | 0.513096472  | -0.124183091  | 0.004594317 | PKR2G    | PKR2G                           | NM_006259                                                     | TS2200                                  |         |
| cg14861497 | 0.925639454 | 0.806399595  | -0.119059859  | 0.004595192 | KLF5     | KLF5                            | NM_0011730                                                    | Body                                    |         |
| cg26207102 | 0.962069537 | 0.849321237  | -0.118287203  | 0.004600323 | TEAD1    | TEAD1                           | NM_002361                                                     | SUTR                                    |         |
| cg11835978 | 0.918459626 | 0.780411894  | -0.138047731  | 0.004607349 | SEMA5A   | SEMA5A                          | NM_000986                                                     | 3UTR                                    |         |
| cg02097294 | 0.639714215 | 0.740193424  | 0.100479209   | 0.004608089 | OPCML    | OPCML                           | NM_001012393                                                  | Body                                    |         |
| cg00671224 | 0.952355207 | 0.852355207  | -0.084964681  | 0.004608353 | OPCML    | OPCML                           | NM_001012393                                                  | Body                                    |         |
| cg06379478 | 0.833440558 | 0.715807928  | -0.11763613   | 0.004612099 | LMF1     | LMF1                            | NM_022773                                                     | Body                                    | Island  |
| cg24068761 | 0.952463732 | 0.847038634  | -0.109425098  | 0.004615215 | KCNAB2   | KCNAB2;KCNAB2                   | NM_003636;NM_172130                                           | Body;Body                               |         |
| cg02042186 | 0.908496912 | 0.748131976  | -0.151224208  | 0.004605847 | TSPAN2   | TSPAN2                          | NM_001012970                                                  | Body                                    |         |
| cg19763774 | 0.90400848  | 0.748131976  | -0.162176503  | 0.004622022 | TSPAN2   | TSPAN2                          | NM_005725                                                     | Body                                    |         |
| cg23011899 | 0.842362886 | 0.711431147  | -0.130931738  | 0.004622894 | CDE3     | CDE3;CDE3                       | NM_00104003;NM_0011780                                        | 3UTR;SUTR                               | N_Shelf |
| cg22472764 | 0.918929254 | 0.828168889  | -0.129366045  | 0.004607035 | RRM2B    | RRM2B                           | NM_015713                                                     | Body                                    | N_Shore |
| cg13225596 | 0.905746553 | 0.19694985   | 0.101203297   | 0.004640244 | BA3      | BA3                             | NM_0011704                                                    | TS1500                                  | N_Shore |
| cg07170824 | 0.29186815  | 0.41396815   | 0.114740391   | 0.004646334 | ACVR1    | ACVR1;ACVR1                     | NM_000200;NM_0010020                                          | 1stExon;SUTR                            | N_Shore |
| cg00155622 | 0.127707983 | 0.242448374  | 0.114740391   | 0.004646334 | RTF1     | RTF1                            | NM_015138                                                     | Body                                    | Island  |
| cg08998414 | 0.88514815  | 0.639184714  | -0.245957101  | 0.004648406 | UBE2H    | UBE2H                           | NM_003344;NM_182697                                           | Body;Body                               |         |
| cg10628801 | 0.90483277  | 0.79657537   | -0.20826833   | 0.004648406 | PTPN22   | PTPN22;PTPN22;PTPN22            | NM_002847;NM_130842;NM_130843                                 | Body;Body;Body                          | N_Shore |
| cg17171388 | 0.84943725  | 0.84153725   | -0.10136145   | 0.004648406 | GUC1C    | GUC1C                           | NM_00100636;NM_00116629                                       | TS1500                                  |         |
| cg21887097 | 0.11265249  | 0.217885834  | 0.105233344   | 0.004656402 | LAMB1    | LAMB1                           | NM_002291                                                     | Body                                    |         |
| cg2458292  | 0.911561488 | 0.783136391  | -0.128424897  | 0.004659322 | MAP1B    | MAP1B                           | NM_005909                                                     | Body                                    | N_Shelf |
| cg22828922 | 0.611571488 | 0.248878959  | 0.130146632   | 0.004664049 | IRF6     | IRF6                            | NM_006147                                                     | SUTR                                    | N_Shore |
| cg07538191 | 0.92340001  | 0.799710265  | -0.12629736   | 0.004665003 | MAP1B    | MAP1B                           | NM_005909                                                     | Body                                    |         |
| cg23748584 | 0.909462826 | 0.758526801  | -0.150396026  | 0.004678274 | IRF6     | IRF6                            | NM_006147                                                     | SUTR                                    | N_Shore |
| cg11570233 | 0.882545001 | 0.783136391  | -0.109228048  | 0.004678274 | OLA1     | OLA1;OLA1                       | NM_013341;NM_001101708                                        | Body;Body                               |         |
| cg20795500 | 0.899441913 | 0.737876462  | -0.16067251   | 0.004683979 | VN1R4    | VN1R4                           | NM_013341;NM_001101708                                        | Body;Body                               |         |
| cg11791507 | 0.973268482 | 0.73032122   | -0.10629372   | 0.004683979 | VN1R4    | VN1R4                           | NM_013341;NM_001101708                                        | Body;Body                               |         |
| cg21831183 | 0.81384208  | 0.78968294   | -0.140158928  | 0.004702356 | ZFYF1    | ZFYF1;ZFYF1                     | NM_021260;NM_178441                                           | Body;SUTR                               |         |
| cg02229100 | 0.945933034 | 0.840838373  | -0.10539462   | 0.004704151 | TFNFI8   | TFNFI8                          | NM_00100897                                                   | Body                                    |         |
| cg05335876 | 0.81659772  | 0.682659899  | -0.14034173   | 0.004714874 | NKXAR5   | NKXAR5;NKPAP1                   | NM_0015092                                                    | Body                                    |         |
| cg20450284 | 0.94949698  | 0.834749698  | -0.11616898   | 0.004719172 | NKXAR5   | NKXAR5;NKPAP1                   | NM_0015092                                                    | Body                                    |         |
| cg27511525 | 0.862096622 | 0.725490401  | -0.136579101  | 0.004717275 | ADAMTS17 | ADAMTS17                        | NM_139057                                                     | Body                                    |         |
| cg25294196 | 0.871544664 | 0.682882993  | -0.108661671  | 0.004732638 | PML      | PML;PML;PML;PML;PML;PML;PML;PML | NM_033247;NM_033244;NM_002675;NM_033238;NM_033246             | Body;Body;Body;Body;Body;Body;Body;Body | N_Shore |
| cg01947066 | 0.0744662   | 0.12774862   | 0.10774862    | 0.004732638 | FAM58B   | FAM58B                          | NM_182495                                                     | Body                                    |         |
| cg03397616 | 0.855029126 | 0.745510676  | -0.1070465    | 0.00473844  | FAM58B   | FAM58B                          | NM_182495                                                     | Body                                    |         |
| cg18100746 | 0.895209115 | 0.667459629  | -0.2227603286 | 0.00474258  | KIAA1024 | KIAA1024                        | NM_015206                                                     | TS1500                                  | N_Shore |
| cg05139694 | 0.123232533 | 0.23286945   | 0.11601078    | 0.004748797 | PCP2     | PCP2                            | NM_015206                                                     | Body;Body;Body;Body                     | N_Shelf |
| cg16095660 | 0.883398175 | 0.752184052  | -0.131213923  | 0.004748797 | SLC16A1  | SLC16A1                         | NM_001145438;NM_001145439;NM_027017;NM_02717;NR_02            | Body;Body;Body;Body                     |         |
| cg07527909 | 0.209382186 | 0.32981032   | 0.13598846    | 0.004762301 | CALLU    | CALLU;CALLU                     | NM_00116649;NM_003051                                         | Body;Body;Body                          |         |
| cg07989042 |             |              |               |             |          |                                 |                                                               |                                         |         |
